# Supplementary material for: Species-Specificity of Transcriptional Regulation and the Response to Lipopolysaccharide in Mammalian Macrophages
Source: PubMed Central journal article supplement (PMC7386301; doi:10.3389/fcell.2020.00661), 2020-07-21
Supplement: Image_2.pdf [file Image_2.pdf]

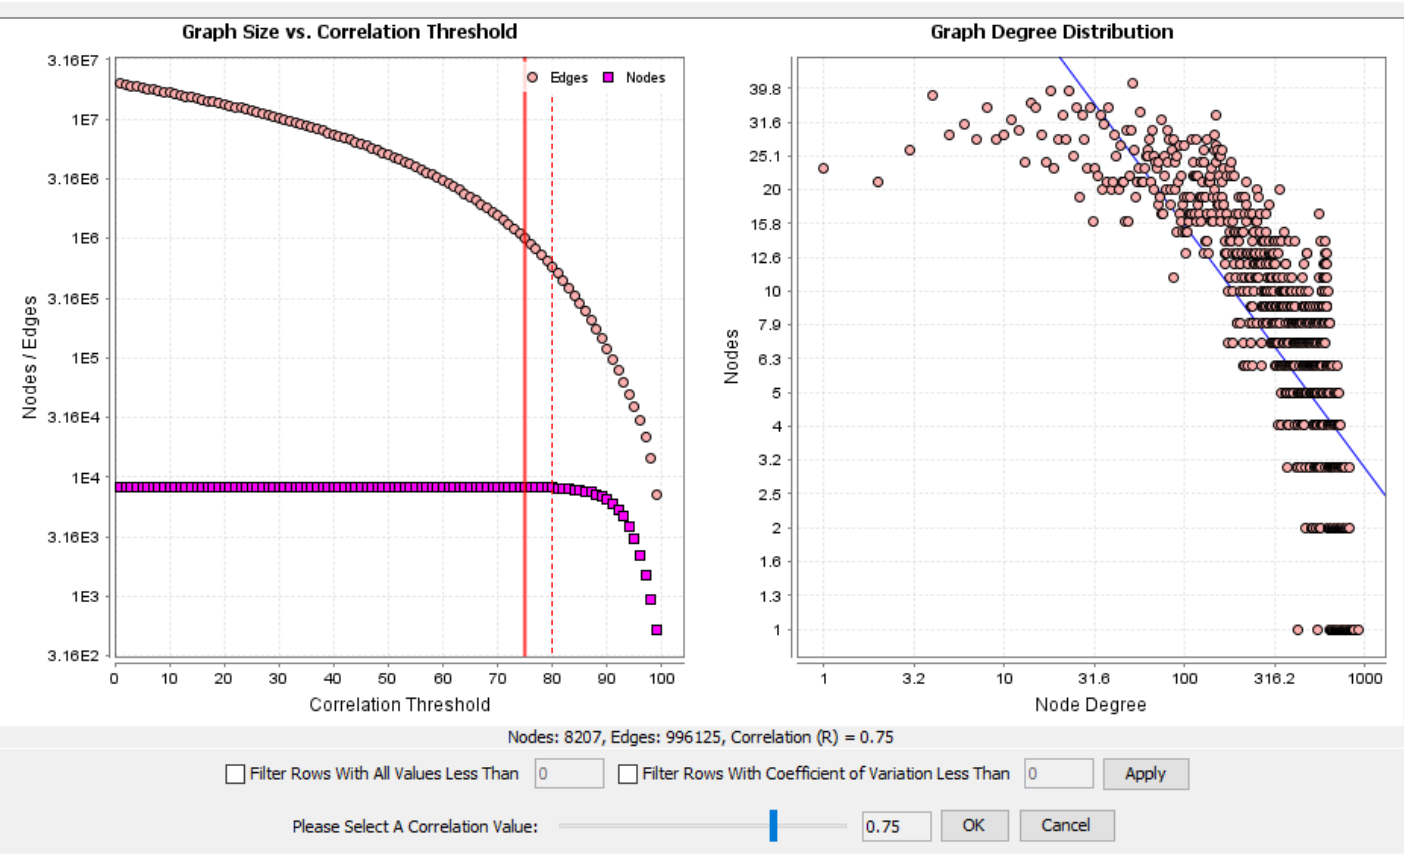

Supplementary Figure S2. Graph size vs correlation threshold for nine species BMDM treated with LPS. The correlation threshold chosen was 0.8 (broken line), which included 8,129 nodes making 575,702 edges.
