# Supplementary material for: Species-Specificity of Transcriptional Regulation and the Response to Lipopolysaccharide in Mammalian Macrophages
Source: Front Cell Dev Biol. 2020 Jul 21;8:661. doi: 10.3389/fcell.2020.00661 (PMC7386301; doi:10.3389/fcell.2020.00661)
Supplement: Supplementary file 7 [file Table_5.xlsx]

## Sheet: Supplementary Table S5
Supplementary Table S5. Expression in sheep BMDM after LPS stimulation.
Gene name ( shown as 'gene name/gene ID' if multiple genes have the same name)	Gene ID (Ensembl if available, else NCBI)	Transcript IDs (Ensembl and/or NCBI)	Description	Coordinates	0h | ERS2107085	2h | ERS2107482	4h | ERS2107384	7h | ERS2107479	24h | ERS2107393	0h | ERS2107265	2h | ERS2107501	4h | ERS2107461	7h | ERS2107495	24h | ERS2107488	0h | ERS2107212	2h | ERS2107465	4h | ERS2107390	7h | ERS2107486	24h | ERS2107462	0h | ERS2107181	2h | ERS2107389	4h | ERS2107503	7h | ERS2107383	24h | ERS2107392	0h | ERS2107109	2h | ERS2107386	4h | ERS2107484	7h | ERS2107413	24h | ERS2107499	0h | ERS2107469	2h | ERS2107399	4h | ERS2107505	7h | ERS2107385	24h | ERS2107409
Time post-LPS					0h	2h	4h	7h	24h	0h	2h	4h	7h	24h	0h	2h	4h	7h	24h	0h	2h	4h	7h	24h	0h	2h	4h	7h	24h	0h	2h	4h	7h	24h
SRA sample ID					ERS2107085	ERS2107482	ERS2107384	ERS2107479	ERS2107393	ERS2107265	ERS2107501	ERS2107461	ERS2107495	ERS2107488	ERS2107212	ERS2107465	ERS2107390	ERS2107486	ERS2107462	ERS2107181	ERS2107389	ERS2107503	ERS2107383	ERS2107392	ERS2107109	ERS2107386	ERS2107484	ERS2107413	ERS2107499	ERS2107469	ERS2107399	ERS2107505	ERS2107385	ERS2107409
BioProject ID					PRJEB19199	PRJEB19199	PRJEB19199	PRJEB19199	PRJEB19199	PRJEB19199	PRJEB19199	PRJEB19199	PRJEB19199	PRJEB19199	PRJEB19199	PRJEB19199	PRJEB19199	PRJEB19199	PRJEB19199	PRJEB19199	PRJEB19199	PRJEB19199	PRJEB19199	PRJEB19199	PRJEB19199	PRJEB19199	PRJEB19199	PRJEB19199	PRJEB19199	PRJEB19199	PRJEB19199	PRJEB19199	PRJEB19199	PRJEB19199
Sex					Male	Male	Male	Male	Male	Male	Male	Male	Male	Male	Male	Male	Male	Male	Male	Female	Female	Female	Female	Female	Female	Female	Female	Female	Female	Female	Female	Female	Female	Female
Individual no.					male 1	male 1	male 1	male 1	male 1	male 2	male 2	male 2	male 2	male 2	male 3	male 3	male 3	male 3	male 3	female 1	female 1	female 1	female 1	female 1	female 2	female 2	female 2	female 2	female 2	female 3	female 3	female 3	female 3	female 3
LOC105605702	105605702	XM_012107807	uncharacterized LOC105605702	X:80274531-80275217:-1	3.212	7.087	2.841	0.869	5.664	1.38	7.214	5.003	1.779	9.737	2.035	4.307	2.537	1.094	2.321	1.377	7.858	10.001	2.821	5.252	3.144	8.894	5.999	2.487	5.511	2.621	5.362	4.096	0.615	6.711
TFB1M	ENSOARG00000004216	ENSOART00000004587.1, XM_012183173	transcription factor B1, mitochondrial	8:78483687-78545137:-1	5.95	2.365	1.966	4.379	4.552	4.902	2.48	5.524	10.001	6.303	5.517	2.031	1.587	4.381	2.638	4.262	3.223	3.116	6.443	4.564	5.87	3.629	4.895	7.682	4.865	6.406	2.665	3.232	6.569	5.58
C5H19orf38	101115789	XM_012177903, XM_012177904, XM_012177905, XM_012177906, XM_012177907, XM_012177908, XM_012177910	chromosome 5 open reading frame, human C19orf38	5:12981491-12988506:1	5.235	4.545	1.976	1.132	2.912	8.183	6.164	3.263	1.899	6.306	6.822	5.676	1.981	2.218	3.541	7.734	8.703	7.771	4.747	10.004	8.751	7.441	2.749	2.7	7.017	6.949	3.718	3.911	1.839	6.584
SIAE	ENSOARG00000010527	ENSOART00000011454.1, ENSOART00000011455.1, XM_004019503, XM_004019504, XM_012101832, XM_012101833, XM_012101834, XM_012101835, XM_012101836	sialic acid acetylesterase	21:27340698-27378870:-1	9.361	4.762	4.934	7.079	4.446	8.709	6.262	5.853	8.474	6.894	8.527	4.867	4.112	6.371	3.778	9.283	8.06	7.11	9.28	7.47	10.007	7.08	5.944	9.233	6.923	9.697	6.362	5.608	8.333	6.74
SMIM24	101117756	XM_004008618	small integral membrane protein 24	5:17989104-17992624:1	4.059	1.483	1.083	2.751	1.413	6.476	1.463	3.009	4.443	1.956	6.415	2.101	0.996	3.286	0.636	5.108	1.906	2.774	6.077	1.981	10.009	4.422	1.672	8.07	3.741	9.306	4.717	3.527	4.639	2.611
ZDHHC15	ENSOARG00000018250	ENSOART00000019862.1	zinc finger DHHC-type containing 15	X:64017411-64110527:1	6.782	2.679	2.277	3.428	3.918	7.087	2.856	3.132	4.441	5.479	7.361	3.846	3.034	2.599	1.814	6.88	4.092	3.353	6.498	6.329	10.013	5.357	3.9	7.85	6.977	9.498	5.27	3.236	5.956	7.116
ENSOARG00000014457	ENSOARG00000014457	ENSOART00000015740.1	no description available	5:5009157-5012267:-1	8.513	2.278	6.591	5.01	2.595	3.93	2.679	5.747	7.27	3.551	5.263	4.47	4.284	2.405	1.831	5.711	4.443	3.444	5.787	0	6.408	3.61	10.015	6.163	5.472	5.278	3.177	3.294	6.437	2.889
TRIM59	101105795	XM_004003205, XM_012100416, XM_012100426	tripartite motif containing 59	1:225065641-225080879:1	7.875	2.13	2.521	4.339	3.472	6.269	2.506	3.335	6.357	5.983	9.013	1.96	1.489	6.016	2.044	4.072	0.007	1.417	4.05	4.16	8.711	3.771	4.327	7.514	5.123	10.024	1.866	4.953	6.572	6.535
L2HGDH	ENSOARG00000020633	ENSOART00000022479.1	L-2-hydroxyglutarate dehydrogenase	7:40246418-40290279:-1	7.909	3.126	1.952	3.4	3.48	7.67	3.662	3.575	6.604	4.999	6.146	3.115	1.872	3.441	0.919	7.033	3.501	3.381	6.73	5.619	10.03	4.477	4.531	7.2	6.424	9.456	4.769	3.584	7.199	6.674
GTPBP1	ENSOARG00000015877	ENSOART00000017291.1, XM_012175662, XM_012175663	GTP binding protein 1	3:214320486-214332111:1	6.209	7.406	6.428	5.434	7.647	6.222	7.944	8.397	6.376	8.841	6.007	6.629	7.628	7.095	5.649	5.777	8.449	10.033	7.945	8.08	6.767	7.685	9.308	6.997	8.342	6.473	7.541	8.553	6.006	7.174
NDUFAF2	101107993	XM_004016952	NADH dehydrogenase (ubiquinone) complex I, assembly factor 2	16:18238020-18412342:-1	7.231	4.316	3.458	4.414	7.923	7.669	2.944	3.322	6.179	8.288	10.034	4.644	3.463	4.447	3.417	6.098	5.355	4.277	5.07	6.043	8.179	3.53	2.672	7.125	5.049	8.911	5.514	5.451	6.306	6.89
ENSOARG00000018044	ENSOARG00000018044	ENSOART00000019638.1	transmembrane protein 45A	1:163369993-163476213:1	1.293	1.212	0.816	1.121	5.363	1.996	0.848	0.688	0.837	3.722	2.467	1.974	0.824	1.48	10.049	1.542	1.268	1.654	1.644	2.94	3.6	2.525	2.306	3.933	5.894	3.831	1.233	1.052	2.538	3.894
ZP3	ENSOARG00000013902	ENSOART00000015135.1, XM_004020981	zona pellucida glycoprotein 3 (sperm receptor)	24:34352402-34360065:1	10.061	4.022	4.288	8.934	3.611	7.849	4.249	5.881	7.944	4.046	7.648	3.836	4.508	7.679	3.801	7.061	4.056	4.265	7.315	3.297	6.401	3.397	3.339	5.833	3.162	6.545	4.365	4.454	7.74	4.161
DCXR	ENSOARG00000017409	ENSOART00000018949.1, XM_012186403, XM_012186404, XM_012186405	dicarbonyl/L-xylulose reductase	11:50014548-50022353:1	9.707	10.066	6.346	6.839	6.706	8.769	6.272	5.122	5.761	5.491	6.765	5.247	3.015	4.916	3.403	9.173	8.287	7.249	5.94	5.078	5.813	4.974	3.216	4.807	6.972	5.826	5.213	3.722	3.665	4.299
EFTUD1	101112350	XM_004017779, XM_012098550	elongation factor Tu GTP binding domain containing 1	18:23448337-23559718:1	9.673	4.604	4.048	5.769	8.047	7.255	3.42	5.046	10.069	7.625	8.605	3.883	2.122	5.576	5.321	7.778	3.46	1.998	6.982	5.798	7.665	5.594	4.647	7.941	5.139	9.539	5.638	4.795	8.368	7.755
ENSOARG00000015844	ENSOARG00000015844	ENSOART00000017254.1, ENSOART00000017255.1	CXADR Ig-like cell adhesion molecule	1:137831616-137895592:-1	0.325	0	0	1.339	4.457	0.35	0	0	0.359	5.793	2.702	1.361	0.426	1.549	10.069	0.372	0.432	0	0.556	1.598	1.806	0	0.477	4.079	3.783	1.993	0.316	0.881	2.659	4.431
ATP6V0E2	ENSOARG00000001047	ENSOART00000001120.1	ATPase H+ transporting V0 subunit e2 [Source:VGNC Symbol;Acc:VGNC:26315] (assigned to orthologue: ENSBTAG00000006022)	4:112088014-112091049:1	5.633	4.091	3.526	1.91	4.615	2.967	8.246	4.385	1.987	3.399	7.196	9.08	4.336	1.34	1.988	3.035	7	7.356	2.402	5.039	5.587	9.4	8.703	4.732	8.444	6.619	6.799	7.218	6.113	10.07
ZNF852	101119762	XM_012099478, XM_012099479, XM_012099480, XM_012099481, XM_012099482, XM_012099484	zinc finger protein 852	19:16264333-16280854:-1	6.937	3.029	2.809	3.992	3.884	4.372	1.892	3.588	4.404	5.7	8.089	3.48	4.903	10.071	3.846	4.143	2.491	2.324	4.403	2.93	4.881	2.343	2.1	4.682	3.66	5.634	2.341	3.566	4.336	4.084
NCOA6	ENSOARG00000010365	ENSOART00000011280.1, XM_004014510, XM_004014511, XM_012189100, XM_012189101, XM_012189102, XM_012189103, XM_012189104, XM_012189105, XM_012189107, XM_012189108, XM_012189109, XM_012189110	nuclear receptor coactivator 6	13:63617021-63659112:-1	3.512	7.036	6.882	2.395	7.523	3.052	8.76	8.657	2.013	10.073	3.598	6.945	6.838	2.527	7.205	2.433	8.833	8.645	2.182	5.878	2.846	6.922	7.656	2.377	6.774	2.881	7.618	8.022	2.018	8.548
WASL	ENSOARG00000000995	ENSOART00000001066.1	WASP like actin nucleation promoting factor	4:87993675-88031409:-1	6.188	4.988	5.842	4.904	6.367	7.091	6.844	8.641	6.593	10.073	6.276	4.933	5.138	5.398	6.433	5.472	5.282	6.713	5.887	7.294	6.084	6.109	6.613	7.019	6.646	6.358	4.811	6.392	6.309	8.469
ENSOARG00000004297	ENSOARG00000004297	ENSOART00000004679.1	no description available	11:26424471-26424557:-1	2.632	0	3.973	0	0	0	0	10.074	3.469	0	0	0	0	5.272	3.162	4.186	0	4.586	6.259	3.987	2.242	4.088	0	3.184	2.675	4.048	0	0	0	0
RPS6KA4	ENSOARG00000007576	ENSOART00000008251.1, XM_012102099	ribosomal protein S6 kinase, 90kDa, polypeptide 4	21:41957539-41967906:1	7.463	7.853	5.275	3.674	6.955	6.686	7.844	5.697	5.682	10.076	8.003	9.504	4.098	3.559	4.653	6.389	6.329	5.047	4.843	8.688	6.523	7.347	6.651	4.927	7.781	8.47	8.489	4.752	4.198	9.562
ZNF317	101108483	XM_004008500	zinc finger protein 317	5:11525248-11539241:1	9.717	5.804	5.247	8.615	4.177	8.942	5.885	7.415	10.077	5.613	8.131	4.278	5.104	7.215	3.471	8.685	5.251	6.433	9.169	4.335	7.836	4.972	6.282	8.103	4.281	9.374	4.315	6.348	8.691	4.722
ZNF354A	ENSOARG00000006794	ENSOART00000007386.1	zinc finger protein 354A [Source:NCBI gene;Acc:524106] (assigned to orthologue: ENSBTAG00000006428)	5:37246190-37270513:-1	9.892	3.765	3.356	6.211	4.601	8.614	3.338	4.662	8.161	6.556	9.931	3.422	2.239	4.4	3.134	8.424	4.145	4.045	10.079	4.614	8.677	4.216	4.332	7.697	4.124	8.775	3.019	3.001	7.235	5.253
SRM	ENSOARG00000004158	ENSOART00000004519.1, XM_012187935	spermidine synthase	12:40689899-40709330:1	6.256	4.581	4.69	3.487	5.307	3.497	3.676	4.495	8.852	6.591	7.404	5.68	3.119	3.861	2.798	2.955	3.383	2.887	3.277	5.004	7.019	7.17	7.073	7.849	7.702	8.992	10.08	8.857	7.939	9.142
MGST2	ENSOARG00000012987	ENSOART00000014117.1, XM_004017241, XM_012097459	microsomal glutathione S-transferase 2	17:17698751-17732805:-1	0.772	0.862	0.956	0.247	0.28	0.624	0.163	0	0.871	0.749	8.767	5.315	3.214	3.526	10.081	1.489	1.639	1.253	1.097	3.389	5.225	8.71	1.62	3.838	4.959	5.398	1.684	1.713	1.929	2.551
ABCA5	ENSOARG00000013972	ENSOART00000015224.1, XM_004013149, XM_012186612, XM_012186613, XM_012186614, XM_012186615, XM_012186616	ATP-binding cassette, sub-family A (ABC1), member 5	11:60200317-60246311:1	6.801	4.244	2.837	2.935	2.26	10.083	6.129	4.465	3.861	8.091	6.917	5.183	3.142	2.521	1.815	7.32	5.458	4.741	4.905	4.62	8.022	6.15	4.268	4.379	6.042	7.307	4.914	4.004	3.65	5.065
NOP14	ENSOARG00000014516	ENSOART00000015805.1, ENSOART00000015806.1	NOP14 nucleolar protein	6:115206734-115220471:1	6.685	5.401	5.518	6.278	3.957	6.036	5.783	6.929	10.089	7.018	7.442	4.785	3.691	3.348	2.27	5.919	3.785	4.242	4.248	4.996	6.425	5.75	7.314	7.087	5.15	7.045	6.59	5.955	7.383	5.645
ACOX3	ENSOARG00000012922	ENSOART00000014052.1	acyl-CoA oxidase 3, pristanoyl	6:114055342-114103630:-1	8.558	7.078	5.539	4.555	5.905	7.381	7.623	5.608	5.323	9.175	8.156	6.793	4.673	4.49	4.024	8.133	6.262	7.011	6.748	8.342	7.878	8.241	7.768	7.231	8.955	9.647	8.622	6.752	5.993	10.09
EIF4A2/ENSOARG00000018462	ENSOARG00000018462	ENSOART00000020094.1	eukaryotic translation initiation factor 4A2 [Source:HGNC Symbol;Acc:HGNC:3284] (assigned to orthologue: ENSCHIG00000012317)	X:25080742-25081965:1	5.137	4.313	3.84	4.685	2.163	5.876	4.475	6.209	10.1	3.511	7.158	4.642	4.056	5.268	2.614	6.424	3.943	3.548	5.224	2.814	4.802	3.767	5.01	6.228	3.701	5.643	4.578	3.456	7.411	2.996
HEATR5B	ENSOARG00000009946	ENSOART00000010833.1, XM_012173552	HEAT repeat containing 5B	3:86893266-86980959:1	9.71	2.792	1.886	5.212	4.466	10.102	2.025	2.906	7.094	6.911	9.086	3.767	1.809	5.338	2.944	10.062	3.808	3.034	9.144	5.442	10.004	3.636	3.135	8.821	6.056	9.107	2.868	1.862	6.537	5.627
SMARCA2	ENSOARG00000013265	ENSOART00000014434.1, XM_004004345	SWI/SNF related, matrix associated, actin dependent regulator of chromatin, subfamily a, member 2	2:69764239-69941691:1	10.105	6.569	2.755	1.85	5.702	8.599	6.258	2.769	2.359	8.833	9.896	8.028	2.8	2.694	3.707	9.174	9.737	4.286	3.807	8.399	8.54	7.566	3.249	3.323	8.565	7.517	5.697	2.197	2.015	7.636
ENSOARG00000014150	ENSOARG00000014150	ENSOART00000015410.1	no description available	19:49208404-49209057:-1	2.003	5.218	3.124	2.748	5.029	3.825	2.582	6.79	4.55	5.818	3.896	5.028	5.843	3.376	1.171	5.264	8.092	6.13	3.63	3.291	4.134	10.107	7.729	4.173	5.434	4.301	5.545	4.463	4.924	4.029
SLC35B3	ENSOARG00000016835	ENSOART00000018338.1, ENSOART00000018340.1, XM_012101315	solute carrier family 35 (adenosine 3'-phospho 5'-phosphosulfate transporter), member B3	20:46141728-46160988:1	4.359	4.162	3.654	3.25	4.408	4.134	5.889	6.613	4.284	7.825	4.449	5.245	4.807	4.529	4.426	10.108	7.11	6.476	8.696	8.05	4.221	6.46	6.447	4.741	6.37	8.486	5.44	4.602	7.497	8.714
SCLT1	ENSOARG00000014865	ENSOART00000016177.1, XM_012097482, XM_012097483, XM_012097484, XM_012097485	sodium channel and clathrin linker 1	17:28524268-28717789:1	9.752	5.173	3.371	5.344	3.566	7.221	4.61	3.785	4.727	4.678	10.11	6.893	4.239	6.95	2.565	5.848	5.441	7.333	6.029	3.101	7.453	5.592	3.697	6.054	3.698	7.361	4.171	2.657	4.318	3.653
GLMN	ENSOARG00000016209	ENSOART00000017666.1, XM_012176213	glomulin, FKBP associated protein	1:68700326-68746402:-1	8.951	4.72	4.372	5.687	6.055	6.376	4.769	4.546	7.453	5.614	9.783	5.358	4.316	4.77	4.13	6.42	5.172	3.92	6.097	7.718	9.505	6.394	5.906	9.15	7.285	10.117	6.859	5.062	6.888	8.175
MSANTD2	ENSOARG00000010700	ENSOART00000011646.1, XM_004019508	Myb/SANT-like DNA-binding domain containing 2	21:27466696-27475979:-1	5.611	6.422	7.477	6.491	7.809	4.694	6.165	8.794	9.205	7.787	6.782	7.151	9.014	8.06	4.336	4.837	8.113	9.052	8.465	5.63	6.998	7.554	7.835	10.119	7.41	7.562	9.4	8.911	7.992	7.952
SOCS7	ENSOARG00000008919	ENSOART00000009715.1	suppressor of cytokine signaling 7	11:38576815-38603368:1	10.134	6.223	6.222	7.283	5.588	8.403	5.553	6.591	8.563	6.107	8.462	4.418	4.47	7.497	4.386	8.228	5.803	6.175	7.943	4.717	7.653	5.675	6.629	7.104	4.363	8.477	5.754	6.221	8.051	6.068
PLEKHG3	ENSOARG00000021153	ENSOART00000023050.1, XM_012181834	pleckstrin homology domain containing, family G (with RhoGef domain) member 3	7:73786447-73796180:1	6.929	4.56	4.043	3.601	7.404	7.167	4.986	3.471	3.971	10.138	8.93	3.658	2.252	3.263	6.339	6.321	4.524	3.343	4.372	6.738	7.211	4.326	5.937	6.007	6.605	9.43	4.293	5.575	5.634	8.884
DYSF	ENSOARG00000011500	ENSOART00000012517.1, XM_004006058, XM_004006059, XM_004006060, XM_004006061, XM_004006062, XM_004006063, XM_004006065, XM_012173618, XM_012173619, XM_012173620, XM_012173621, XM_012173623, XM_012173624, XM_012173625, XM_012173626, XM_012173627, XM_012173628	dysferlin	3:93294497-93502263:1	2.419	4.334	2.826	1.502	4.035	1.871	3.761	6.555	1.955	3.058	1.608	2.25	2.987	2.85	1.711	3.273	10.146	9.253	6.105	6.809	3.421	6.797	7.549	3.947	8.665	1.994	5.391	5.035	2.328	4.246
TBL3	ENSOARG00000017059	ENSOART00000018576.1, XM_004023246	transducin (beta)-like 3	24:1509433-1521363:1	6.781	7.017	5.404	5.416	5.946	5.065	6.782	7.309	7.371	8.543	7.294	6.867	3.537	2.579	4.071	6.205	6.229	5.262	3.984	7.748	7.007	8.217	10.15	7.875	7.776	6.792	8.356	6.988	6.334	7.63
NSUN6	ENSOARG00000013212	ENSOART00000014368.1, XM_004014257, XM_012188457, XM_012188458	NOP2/Sun domain family, member 6	13:32076532-32153198:-1	8.679	4.593	2.431	4.341	3.885	9.001	3.695	3.136	7.149	6.185	10.157	5.001	2.24	4.085	2.159	6.504	3.7	2.029	4.641	4.591	9.372	4.572	3.374	7.521	5.225	9.33	4.551	2.798	6.384	5.549
ENSOARG00000011359	ENSOARG00000011359	ENSOART00000012354.1	no description available	X:93845133-93873886:1	10.16	1.326	1.073	2.007	1.47	5.75	1.709	0.968	1.859	2.981	7.98	2.266	1.246	1.805	1.604	4.394	1.701	0.988	2.122	2.052	5.816	1.781	0.926	2.44	2.456	6.484	1.37	0.718	1.903	1.994
ARMCX2	ENSOARG00000010134	ENSOART00000011025.1	armadillo repeat containing X-linked 2	X:125818791-125820620:-1	3.425	2.47	1.769	3.242	2.585	3.816	2.715	2.107	3.42	4.478	3.965	2.351	2.372	5.389	1.765	4.564	4.148	4.744	10.166	4.566	5.92	2.508	2.138	4.901	4.745	4.674	2.03	1.372	3.221	4.048
CASD1	ENSOARG00000002097	ENSOART00000002268.1, XM_012176343, XM_012176344, XM_012176345	CAS1 domain containing 1	4:11777362-11822394:1	8.193	3.822	4.072	4.483	3.091	7.148	3.718	4.257	6.023	5.931	10.168	5.363	3.982	4.735	3.526	6.744	3.427	3.825	6.59	4.568	6.31	3.326	3.315	5.771	3.463	7.639	4.403	4.427	6.191	5.753
SUGP2	ENSOARG00000009811	ENSOART00000010676.1, XM_012179083	SURP and G patch domain containing 2	5:3955123-3984657:1	7.318	4.102	3.548	3.683	5.319	8.123	4.432	4.218	4.644	10.142	10.171	4.092	2.828	4.775	4.02	5.855	3.815	3.74	5.462	5.069	8.037	4.863	4.49	4.915	6.591	6.255	3.255	3.064	4.224	6.313
POLR3A	ENSOARG00000009656	ENSOART00000010525.1, XM_004021506, XM_012105399	polymerase (RNA) III (DNA directed) polypeptide A, 155kDa	25:33539596-33583960:-1	6.231	6.427	9.294	6.491	7.679	4.896	5.646	10.179	7.679	8.21	6.941	4.347	6.545	5.146	4.77	4.544	5.292	6.291	4.933	6.306	4.784	6.087	9.739	4.709	5.955	5.93	6.679	9.747	6.464	7.257
KCNMB4	ENSOARG00000020198	ENSOART00000021991.1, XM_004006463	potassium channel subfamily M regulatory beta subunit 4	3:149092281-149169278:-1	0.321	1.053	2.686	2.872	0.391	0.372	1.034	1.533	2.209	0.484	0.878	1.057	6.32	10.185	0.455	0.552	1.891	1.565	1.967	0.609	0.531	0.261	0.532	0.583	0.53	0.961	0.577	0.861	0.585	0.823
ENSOARG00000005887	ENSOARG00000005887	ENSOART00000006400.1	no description available	13:73708849-73710858:-1	10.19	6.933	5.847	6.935	7.056	9.43	6.657	8.288	9.052	9.294	10.014	7.879	5.056	5.664	3.99	9.974	8.093	6.623	7.439	7.448	9.104	7.565	8.148	8.922	7.033	9.744	7.768	6.878	8.874	9.193
KLF3	ENSOARG00000010144	ENSOART00000011036.1	Kruppel like factor 3	6:57915094-57933985:1	10.199	6.164	5.353	5.081	6.784	9.313	8.246	7.817	5.819	10.015	9.969	8.348	7.286	8.892	9.454	7.892	5.747	5.732	8.347	10.186	7.834	4.753	5.713	5.722	8.566	9.303	6.805	6.569	5.294	9.997
FAM118A	ENSOARG00000019370	ENSOART00000021095.1, XM_012175768, XM_012175770	family with sequence similarity 118, member A	3:219745813-219763571:1	5.407	2.974	2.641	5.149	5.789	10.187	4.927	5.485	6.421	10.207	8.076	2.852	1.701	5.657	9.205	7.757	4.776	4.108	6.981	5.952	4.584	4.603	5.934	4.756	4.829	7.663	4.458	3.334	5.805	7.498
ENSOARG00000007322	ENSOARG00000007322	ENSOART00000007966.1	T-cell surface glycoprotein CD1a	1:107485344-107488515:1	0.782	1.176	0.285	0.256	0.206	6.09	2.337	2.377	2.19	0.119	0.665	0.406	0.344	0.044	0	10.043	8.476	5.942	6.792	1.659	10.208	6.178	6.468	6.655	5.59	5.923	4.063	3.239	4.068	1.695
EIF2AK4	ENSOARG00000020101	ENSOART00000021888.1, XM_004010439, XM_012181188, XM_012181189, XM_012181190	eukaryotic translation initiation factor 2 alpha kinase 4	7:32644215-32713776:1	10.211	5.032	5.435	7.614	6.293	6.971	5.452	5.801	8.368	7.69	9.468	5.648	5.123	6.401	4.922	6.631	4.989	5.193	8.022	6.505	8.619	6.243	6.489	8.872	6.91	9.227	6.025	5.812	8.669	6.984
DOCK9	ENSOARG00000003624	ENSOART00000003953.1, XM_012184879, XM_012184880, XM_012184881, XM_012184882, XM_012184883, XM_012184884, XM_012184885, XM_012184886, XM_012184887, XM_012184888, XM_012184889, XM_012184890, XM_012184891, XM_012184892, XM_012184893, XM_012184894, XM_012184895, XM_012184896, XM_012184897, XM_012184898, XM_012184899, XM_012184900	dedicator of cytokinesis 9	10:75062861-75238653:-1	3.966	1.732	1.986	3.523	4.575	2.623	1.527	1.51	3.471	2.49	3.243	1.627	0.96	1.529	10.213	2.07	2.084	1.892	3.041	2.45	2.92	1.853	1.949	3.422	1.854	5.773	3.888	2.42	4.64	3.568
MTF1	ENSOARG00000019896	ENSOART00000021664.1, XM_012100061, XM_012100119	metal-regulatory transcription factor 1	1:12380796-12422386:-1	7.198	5.208	7.321	8.843	7.878	7.654	5.971	8.702	9.066	7.148	8.194	5.794	7.278	10.214	7.299	6.943	7.899	7.167	8.053	5.024	6.953	5.632	7.29	7.867	5.707	8.125	4.734	6.244	7.755	6.241
ARMH4	ENSOARG00000021107	ENSOART00000022996.1	armadillo like helical domain containing 4	7:67233591-67381578:-1	7.239	4.316	3.434	6.257	2.616	10.218	5.067	5.837	7.361	5.191	7.597	3.769	3.097	4.903	1.894	5.857	3.563	2.53	5.323	2.518	8.664	4.508	3.012	6.185	3.392	7.311	4.148	3.007	5.519	2.521
FAM189B	ENSOARG00000003954	ENSOART00000004294.1, XM_012182732, XM_012182739, XM_012182744, XM_012182751	family with sequence similarity 189, member B	1:103997314-104002756:-1	2.97	6.681	3.84	1.747	9.996	1.34	5.04	3.225	0.988	10.22	2.576	6.29	2.897	0.984	5.018	1.34	4.57	3.695	1.304	6.918	2.437	6.466	5.15	2.269	7.162	1.559	6.765	3.655	1.283	8.451
PTGFRN	ENSOARG00000020252	ENSOART00000022050.1, XM_012179359	prostaglandin F2 receptor inhibitor	1:93395630-93525818:1	2.629	3.305	2.289	1.441	5.495	3.746	5.409	3.974	2.901	8.187	3.431	3.102	2.016	1.905	10.225	2.614	2.462	1.765	2.333	4.171	5.781	6.591	5.359	4.202	5.199	5.804	6.766	4.586	2.876	5.582
LIPT1	ENSOARG00000016529	ENSOART00000017998.1, XM_004006144, XM_012173794	lipoyltransferase 1	3:102076571-102079649:-1	3.878	2.409	3.179	5.216	2.356	4.965	2.162	6.681	10.229	3.902	4.214	1.403	1.799	2.971	0.947	5.585	2.489	2.322	4.64	3.148	6.079	4.045	5.129	7.608	4.646	6.069	2.849	5.374	8.577	4.54
GSTZ1	ENSOARG00000002420	ENSOART00000002627.1, ENSOART00000002630.1, XM_004010812, XM_004010813, XM_012182132, XM_012182133	glutathione S-transferase zeta 1	7:85487601-85497024:1	5.681	4.935	4.122	4.553	5.088	5.445	4.953	4.717	5.665	7.352	5.22	5.267	5.621	7.526	4.072	6.426	5.829	10.23	9.303	5.485	6.37	6.035	5.675	6.998	7.417	6.458	7.85	6.752	5.531	5.808
ENSOARG00000017045	ENSOARG00000017045	ENSOART00000018557.1	no description available	10:34182052-34182276:1	0.861	2.415	1.558	1.733	1.36	0.522	10.243	2.291	3.105	0.799	1.554	1.188	2.264	2.358	0	2.37	2.751	1.74	1.516	1.086	1.943	1.442	3.023	1.072	0.302	0.885	0.47	1.139	0.537	0.476
NRF1	ENSOARG00000004714	ENSOART00000005136.1, ENSOART00000005137.1, XM_004008056, XM_012177109, XM_012177110, XM_012177111, XM_012177112, XM_012177113, XM_012177114	nuclear respiratory factor 1	4:93535358-93626610:1	8.551	4.864	7.48	7.164	5.719	8.097	6.657	8.269	7.952	7.676	10.243	4.801	6.293	7.745	4.294	7.1	5.214	6.754	7.041	5.731	7.083	6.482	7.309	7.494	6.099	9.504	5.694	6.854	7.972	6.929
ACYP1	101109618	XM_004010797, XM_012182065	acylphosphatase 1, erythrocyte (common) type	7:83213229-83218947:-1	4.532	2.754	1.066	5.737	2.614	9.624	7.078	4.99	4.253	1.636	4.195	8.231	2.274	2.86	1.79	3.947	3.991	0	6.3	4.09	6.821	2.905	1.153	1.867	3.796	10.244	4.577	2.202	3.437	3.131
ZDHHC13	ENSOARG00000008938	ENSOART00000009742.1, XM_004019455, XM_012101780	zinc finger, DHHC-type containing 13	21:25112107-25161791:-1	9.416	6.465	5.172	6.832	4.758	8.139	5.66	6.546	9.991	6.364	8.567	5.275	5.245	10.245	3.856	7.717	5.296	6.79	10.151	6.647	7.68	6.131	6.535	7.289	5.904	8.501	4.687	4.909	7.165	5.04
ADCK5	ENSOARG00000013738	ENSOART00000014950.1, XM_012183435	aarF domain containing kinase 5	9:13517990-13531577:-1	6.491	8.139	5.638	4.472	6.668	7.179	8.291	7.123	5.89	10.192	6.498	6.247	4.469	3.381	4.517	5.9	5.758	6.478	5.193	7.96	7.126	8.227	8.557	5.925	8.032	7.343	10.251	6.45	6.058	8.081
CEP128	ENSOARG00000002847	ENSOART00000003090.1, XM_012182167, XM_012182168, XM_012182169, XM_012182170, XM_012182171	centrosomal protein 128kDa	7:89020138-89236278:-1	8.594	4.039	5.366	10.256	5.252	8.21	3.695	4.12	6.359	5.358	8.659	4.45	4.97	9.646	3.588	6.754	2.969	3.951	7.701	4.057	8.115	4.957	4.015	7.059	5.04	8.752	4.004	4.793	7.557	4.941
ENSOARG00000001910	ENSOARG00000001910	ENSOART00000002055.1	no description available	25:42998614-43009627:-1	3.115	5.225	0.992	1.533	0	10.256	4.682	0.375	3.789	3.682	4.443	6.531	1.747	4.181	0.313	5.211	4.993	3.15	4.633	3.773	7.209	1.849	3.956	2.261	0.314	6.477	3.249	2.054	1.269	2.433
PHF2	ENSOARG00000008012	ENSOART00000008730.1, XM_012115903	PHD finger protein 2	2:27764306-27852487:-1	6.709	5.558	4.555	3.757	6.141	7.002	6.119	5.354	3.759	10.256	7.516	5.63	2.682	3.5	5.101	6.172	5.965	5.109	4.673	6.389	6.579	6.962	6.028	5.049	7.456	6.147	6.51	4.493	3.64	8.305
ENSOARG00000014961	ENSOARG00000014961	ENSOART00000016283.1	no description available	13:80696093-80701623:-1	10.259	1.779	4.36	7.516	7.295	8.938	4.351	6.059	6.595	9.16	9.714	2.307	4.355	7.907	8.204	9.639	4.242	8.379	10.222	8.835	8.475	2.217	6.244	8.385	8.335	8.68	2.337	6.104	6.582	8.128
PAK4	ENSOARG00000005985	ENSOART00000006506.1, XM_012095033	p21 protein (Cdc42/Rac)-activated kinase 4	14:48066596-48071255:1	4.156	6.771	6.764	3.745	8.592	4.521	9.167	8.128	4.331	10.261	4.745	6.391	6.174	5.13	6.46	2.59	7.688	9.087	4.117	8.587	4.385	9.067	9.601	5.993	8.295	4.51	7.273	9.286	4.5	8.442
ENSOARG00000018601	ENSOARG00000018601	ENSOART00000020246.1	no description available	AMGL01128528.1:98-514:1	9.698	8.325	4.544	5.08	5.787	6.474	6.122	4.408	6.182	8.583	8.483	4.831	8.473	3.978	3.905	6.528	3.828	5.888	5.396	3.714	8.141	10.265	6.717	7.09	6.871	7.033	5.503	5.346	4.867	5.155
ERAL1	ENSOARG00000004456	ENSOART00000004853.1, XM_004012510	Era-like 12S mitochondrial rRNA chaperone 1	11:19859666-19863934:1	8.016	7.19	6.212	5.649	6	7.171	8.256	9.151	8.506	10.172	8.816	6.765	6.197	5.182	4.372	7.568	9.09	8.99	6.736	8.994	8.257	9.714	10.265	7.758	8.309	8.894	8.686	8.369	6.953	9.271
PPRC1	ENSOARG00000017509	ENSOART00000019059.1, XM_012102833, XM_012102834, XM_012102835, XM_012102836, XM_012102837, XM_012102838, XM_012102839	peroxisome proliferator-activated receptor gamma, coactivator-related 1	22:21980014-21993697:1	3.76	5.886	6.315	2.731	4.521	3.328	5.33	10.266	3.93	8.562	5.056	2.764	2.979	1.329	2.3	3.285	2.898	3.746	2.618	4.815	3.289	5.914	8.649	3.262	5.276	3.923	5.269	8.315	2.97	6.761
ENSOARG00000001201	ENSOARG00000001201	ENSOART00000001276.1	no description available	JH923582.1:21-1910:1	6.717	7.665	2.813	2.635	5.447	7.34	9.171	5.171	4.071	10.267	6.434	4.805	2.042	1.404	4.502	5.412	5.073	4.545	4.663	5.608	6.953	6.644	6.137	5.95	5.446	5.954	5.612	3.423	3.919	6.986
FBXL20	ENSOARG00000010799	ENSOART00000011747.1, XM_004012838, XM_012186029	F-box and leucine-rich repeat protein 20	11:39315731-39409423:-1	9.086	2.02	1.222	3.204	4.187	10.268	2.212	3.308	6.247	5.121	7.459	2.199	1.522	4.532	3.619	9.468	3.396	2.634	7.9	5.532	9.226	2.675	3.001	7.454	6.785	8.397	2.326	2.143	4.557	5.111
NNAT	101122618	XM_004014828	neuronatin	13:66031381-66034468:1	5.785	6.266	5.347	4.486	3.633	5.637	7.26	5.428	3.141	4.431	9.249	10.268	8.632	6.266	3.136	3.568	6.143	6.784	4.752	4.218	7.304	8.714	7.255	6.749	9.861	3.579	4.427	2.752	2.782	4.203
ENSOARG00000016441	ENSOARG00000016441	ENSOART00000017903.1	no description available	15:29897938-29900669:-1	1.732	1.436	1.772	4.373	3.293	2.134	2.715	6.223	8.012	0.471	2.071	2.203	3.259	6.056	0.887	1.311	1.435	2.301	2.572	0.568	1.6	2.594	4.6	7.616	1.066	1.571	2.09	4.949	10.272	0.872
PIANP	ENSOARG00000006918	ENSOART00000007521.1, XM_012175511, XM_012175512	PILR alpha associated neural protein	3:207692990-207696088:1	0	0.045	0	0	0.138	0.274	1.503	1.438	0.149	0.17	0	0	0.062	0	0.047	0.673	10.274	6.782	0.756	1.057	0.488	3.982	2.634	0.35	3.92	0.099	0.246	0.172	0.118	0.276
SUPV3L1	ENSOARG00000005389	ENSOART00000005874.1	Suv3 like RNA helicase	25:25349230-25371374:1	9.603	4.493	3.527	6.167	4.727	8.304	4.659	6.952	10.275	7.307	9.542	4.381	3.051	4.78	2.194	8.089	9.361	7.601	8.639	7.395	8.358	5.616	6.334	9.531	6.906	9.786	4.953	5.363	9.633	8.182
LOC101119987	101119987	XM_012178100, XM_012178101	zinc finger protein 77-like	5:18362406-18380629:-1	5.181	2.89	3.147	3.627	2.663	3.894	3.263	6.683	10.276	4.159	4.616	1.315	3.352	4.682	1.955	2.649	1.585	2.649	2.811	2.686	4.754	3.238	3.477	4.702	3.08	4.932	2.706	4.755	6.149	3.865
SLC12A9	ENSOARG00000015749	ENSOART00000017149.1, XM_004021004	solute carrier family 12, member 9	24:35673727-35683938:-1	3.637	7.345	3.837	2.774	6.123	6.589	10.279	6.754	3.014	9.941	4.689	7.245	4.324	2.778	6.63	5.559	8.737	7.676	4.369	9.699	3.907	8.409	6.585	3.654	8.115	3.771	7.388	3.911	2.52	7.731
ZCCHC7	ENSOARG00000011504	ENSOART00000012505.1	zinc finger CCHC-type containing 7	2:51076086-51317595:-1	7.279	3.841	4.34	6.311	7.018	8.722	5.636	7.928	9.271	7.653	7.237	4.365	4.774	6.733	6.563	10.282	6.66	6.605	8.752	8.463	7.983	5.286	6.698	8.134	6.484	8.748	4.904	6.195	8.464	6.768
PNOC	ENSOARG00000014922	ENSOART00000016244.1, XM_004004438, XM_012128493, XM_012128504	prepronociceptin	2:101577627-101606702:1	10.286	2.702	1.934	8.55	2.718	5.988	3.974	2.611	4.291	4.181	5.368	2.125	1.861	3.156	2.939	5.327	3.13	2.821	3.979	3.112	5.026	2.715	2.893	3.58	3.218	5.399	2.184	2.005	3.994	4.302
CCDC66	ENSOARG00000015275	ENSOART00000016626.1, ENSOART00000016628.1, XM_004018375, XM_012099867, XM_012099868, XM_012099869	coiled-coil domain containing 66	19:44400950-44450897:-1	10.287	2.779	2.377	5.507	4.169	7.805	2.992	3.592	7.038	5.491	9.656	2.51	2	5.478	2.931	6.541	2.409	2.943	6.532	4.401	9.197	2.863	3.459	7.794	4.951	9.687	2.698	2.661	6.383	5.335
ZNF652	ENSOARG00000006129	ENSOART00000006663.1, XM_004012791	zinc finger protein 652	11:36780978-36846838:1	10.046	2.203	0.69	2.077	4.403	9.527	1.851	1.213	3.758	8.164	10.287	2.604	0.324	2.284	3.607	8.742	4.003	1.85	5.185	5.463	8.267	2.311	1.744	4.781	5.56	8.762	1.608	0.787	2.651	6.853
ZSWIM7	ENSOARG00000017433	ENSOART00000018974.1	zinc finger SWIM-type containing 7	11:33029867-33038377:1	7.424	4.701	4.851	5.86	5.885	9.422	6.848	6.019	8.565	8.082	7.174	6.155	5.465	6.62	4.828	9.179	6.879	8.081	9.189	8.983	8.858	7.523	5.904	10.299	10.123	8.172	5.71	5.541	5.276	9.502
BTD	ENSOARG00000015230	ENSOART00000016573.1, XM_012108712	biotinidase	1:270723230-270724375:1	7.89	5.438	5.716	4.176	5.719	5.553	5.997	4.734	5.285	7.534	10.302	8.598	7.958	7.16	8.068	5.818	3.774	4.027	4.214	6.76	4.371	3.615	3.33	3.483	4.95	4.383	3.678	2.31	2.379	4.724
IMMP2L	101113581	XM_004007885, XM_012176789, XM_012176790	IMP2 inner mitochondrial membrane peptidase-like (S. cerevisiae)	4:56849809-57733773:1	6.198	6.114	6.148	3.429	4.491	7.573	8.802	10.304	6.355	6.034	6.434	7.586	5.04	4.435	2.326	7.874	8.828	8.997	7.608	7.791	8.429	9.762	9.128	6.619	9.236	5.246	9.412	7.862	5.851	6.282
TTC38	ENSOARG00000019450	ENSOART00000021183.1, XM_004007658	tetratricopeptide repeat domain 38	3:220712794-220734344:1	10.305	9.269	5.664	4.383	6.762	6.299	5.855	2.506	2.376	8.977	9.778	9.06	4.735	2.465	4.877	4.85	2.41	2.745	2.155	6.399	4.905	5.209	2.693	2.655	4.587	6.291	3.975	2.546	2.441	5.99
UBE2D3	101107195	XM_012179604, XM_012179605, XM_012179607	ubiquitin-conjugating enzyme E2D 3	6:22119906-22147805:1	7.185	3.465	3.609	6.804	1.884	8.225	3.401	2.745	9.221	2.42	8.374	2.15	3.028	8.88	2.543	7.069	2.635	4.933	8.861	2.478	6.516	1.163	0.931	8.202	2.976	10.307	3.921	3.027	7.229	2.913
SCGB2A2	101110371	XM_004019597	secretoglobin, family 2A, member 2	21:40097732-40101002:1	4.335	0.592	4.477	5.657	10.308	0.325	0.994	0.711	2.676	0	0.972	0	0	1.841	1.708	0.446	2.256	1.064	1.901	1.633	1.364	0	1.853	2.475	4.469	0.661	0	1.044	1.464	2.896
CALCB	ENSOARG00000006323	ENSOART00000006876.1, NM_001130155	calcitonin-related polypeptide beta	15:37370861-37374102:-1	0	0	0	0	0	0	0.195	0	0	0	0	0	0.215	0.075	0	0	10.309	10.264	7.326	1.555	0.183	0.185	0	0	0.115	0.085	0	0	0.07	0
SLC25A32	101121687	XM_004011797	solute carrier family 25 (mitochondrial folate carrier), member 32	9:73679300-73713996:1	5.131	3.785	5.639	6.448	4.202	6.748	5.664	8.361	9.897	6.803	5.617	3.756	4.537	6.03	2.494	6.477	5.06	6.071	5.901	4.62	6.597	4.069	4.8	7.715	2.827	5.966	3.778	6.417	10.309	5.392
FLT3LG	ENSOARG00000013140	ENSOART00000014281.1, NM_001078660	fms-related tyrosine kinase 3 ligand	14:54962717-54971093:1	4.03	3.833	6.296	7.113	8.413	4.496	4.3	6.496	6.358	10.312	5.196	3.428	4.111	6.821	3.836	3.883	3.761	3.685	4.299	6.47	5.301	6.211	8.626	5.953	8.202	5.331	7.499	7.151	7.727	7.788
ENSOARG00000006501	ENSOARG00000006501	ENSOART00000007066.1	no description available	10:5130187-5252428:-1	8.558	1.532	1.598	7.164	1.302	7.752	1.982	2.508	7.132	1.397	8.697	1.559	1.852	7.283	1.463	7.307	2.64	1.958	8.424	1.624	8.473	1.815	2.567	8.68	2.252	10.315	2.483	2.861	7.857	2.478
LEAP2	ENSOARG00000013269	ENSOART00000014426.1	liver enriched antimicrobial peptide 2	5:41851283-41852034:1	6.518	2.736	3.438	2.581	2.572	10.044	6.121	0.542	4.043	3.023	10.091	4.49	1.071	6.136	0.889	10.318	5.194	2.19	8.401	0.513	8.271	3.178	3.424	6.932	1.426	6.915	4.887	2.152	5.422	0.898
OGG1	ENSOARG00000006210	ENSOART00000006757.1, XM_012099510, XM_012099511	8-oxoguanine DNA glycosylase	19:16857777-16864841:-1	7.337	5.081	3.43	2.857	5.246	7.96	4.924	2.915	4.069	8.435	10.325	4.791	2.739	4.122	3.233	6.035	3.874	3.643	3.917	6.365	7.719	5.602	4.13	4.573	5.893	9.58	5.455	4.465	4.204	5.917
PAFAH2	ENSOARG00000005679	ENSOART00000006187.1, ENSOART00000006188.1, XM_004005102, XM_012151667, XM_012151676	platelet-activating factor acetylhydrolase 2, 40kDa	2:239973482-240010914:1	7.038	3.764	1.787	3.317	4.496	7.447	3.475	3.08	6.564	5.761	8.249	3.136	1.864	2.343	2.661	6.465	3.12	2.845	5.362	6.352	9.736	5.789	4.127	8.226	7.675	10.33	5.934	3.449	7.517	7.783
SLC37A4	ENSOARG00000012381	ENSOART00000013457.1, ENSOART00000013458.1, XM_012095558	solute carrier family 37 (glucose-6-phosphate transporter), member 4	15:29081952-29088254:-1	5.596	3.934	2.687	3.228	3.598	7.696	6.626	4.81	5.632	10.335	8.251	5.537	3.46	4.072	3.584	5.816	3.546	4.089	4.828	4.787	7.438	6.838	6.732	6.49	8.206	7.825	7.467	5.188	5.062	7.343
OMA1	ENSOARG00000008359	ENSOART00000009099.1, XM_004002018, XM_012155871, XM_012155936	OMA1 zinc metallopeptidase	1:32970137-33032630:-1	7.207	3.921	2.759	3.849	5.175	8.136	3.836	2.907	6.836	6.854	6.558	4.957	2.377	4.099	2.793	7.706	4.458	4.018	7.306	6.976	10.336	5.881	5.016	8.387	9.373	10.29	5.875	2.922	5.565	8.193
ENSOARG00000006099	ENSOARG00000006099	ENSOART00000006632.1	no description available	9:49938963-49962088:-1	6.877	2.71	7.608	9.119	0.644	2.896	0	0	5.014	0	0	0	0.793	6.401	3.072	4.149	2.218	0	6.169	1.587	10.339	4.891	5.348	6.397	0	7.87	0	4.4	4.073	1.558
TTC32	ENSOARG00000016954	ENSOART00000018465.1, XM_012165112	tetratricopeptide repeat domain 32	3:27668867-27676824:-1	7.731	3.293	2.39	1.962	4.665	10.339	3.266	2.582	6.569	5.908	7.785	2.789	0.797	2.443	3.068	9.291	9.92	5.231	6.906	8.021	9.057	5.471	4.593	5.392	6.54	8.698	4.407	2.428	5.025	7.423
FAM206A	101115428	XM_004004026	family with sequence similarity 206, member A	2:14284581-14291146:-1	10.347	0	0.426	2.291	0	3.567	0	0.048	0.808	0.07	1.835	0	0	5.254	0	2.351	2.413	1.331	1.018	0	1.107	1.051	2.403	2.407	0.462	3.615	0	0	5.48	0
NPRL3	ENSOARG00000010749	ENSOART00000011697.1, XM_012104685	nitrogen permease regulator-like 3 (S. cerevisiae)	24:86922-120950:-1	2.428	5.885	4.09	1.922	7.18	2.324	5.637	4.913	2.057	10.347	2.836	5.841	3.469	1.97	5.383	2.04	5.488	4.426	2.192	6.058	2.673	6.928	5.761	2.641	7.807	1.88	5.262	3.747	1.118	5.499
SYNGR1	105614926	XM_012176159	synaptogyrin 1	3:214767843-214788422:1	1.274	1.248	2.164	2.88	5.542	0.431	1.15	2.41	5.043	3.486	1.735	1.608	3.437	6.786	10.351	0.414	0.882	1.745	2.492	3.29	0.747	1.443	2.115	1.944	1.817	0.446	0.617	1.489	1.188	1.599
LOC101109692	101109692	XM_004007226	splicing factor 3B subunit 5-like	3:33164411-33175627:1	9.82	4.919	4.031	7.127	3.882	8.891	3.234	3.957	6.539	3.402	10.355	5.221	4.045	7.371	1.829	7.964	3.732	3.966	7.773	5.794	6.882	4.773	4.913	7.872	4.701	6.626	5.416	3.527	7.672	5.896
MDM4	ENSOARG00000002783	ENSOART00000003016.1, XM_012186937	MDM4, p53 regulator	12:1540709-1578908:1	9.063	4.429	4.527	10.281	3.083	7.045	5.531	7.596	10.355	4.356	9.165	3.917	5.203	9.811	3.513	7.744	4.553	4.928	9.707	3.455	8.84	4.878	6.523	8.151	4.259	10.287	5.391	5.155	9.166	4.881
CENPJ	ENSOARG00000014560	ENSOART00000015853.1, XM_004012312, XM_012184729, XM_012184731, XM_012184732, XM_012184733	centromere protein J	10:36679817-36712062:1	9.565	1.904	1.986	6.411	4.22	7.999	1.766	2.354	6.933	5.594	10.359	1.603	1.587	6.997	2.951	6.297	1.504	1.549	6.093	2.941	8.564	1.994	3.456	9.35	4.01	9.941	2.104	2.771	7.768	5.13
HAO1	ENSOARG00000000053	ENSOART00000000057.1, ENSOART00000000058.1, XM_004014354	hydroxyacid oxidase (glycolate oxidase) 1	13:50002878-50062765:-1	8.211	7.127	3.352	2.039	6.812	7.946	7.048	2.098	2.06	8.426	7.344	4.917	1.51	1.13	4.275	7.579	7.716	3.58	3.244	10.371	6.564	8.271	6.472	4.76	9.092	6.206	6.096	3.547	2.341	10.083
ENSOARG00000015148	ENSOARG00000015148	ENSOART00000016487.1	no description available	14:14267784-14287616:1	8.913	7.319	5.928	6.807	6.035	4.88	5.676	5.136	4.934	8.362	10.373	7.478	7.24	4.816	4.225	5.315	5.042	5.275	4.36	5.984	5.997	7.136	5.932	5.092	6.005	9.308	7.107	5.265	5.535	6.379
U2AF1L4	101120185	XM_004015183, XM_012190194	U2 small nuclear RNA auxiliary factor 1-like 4	14:45578262-45580545:-1	4.61	6.491	7.21	3.804	7.614	8.544	6.21	6.832	6.127	9.26	9.868	6.489	4.264	6.273	4.896	9.34	6.218	6.2	8.036	8.993	9.352	6.565	3.657	7.99	10.374	7.305	4.161	6.546	6.547	9.348
ENDOG	ENSOARG00000009369	ENSOART00000010192.1	endonuclease G	3:7521740-7525266:-1	9.303	4.245	3.041	3.2	3.822	9.503	5.442	5.143	5.313	7.906	9.427	4.221	2.366	2.741	1.422	7.554	4.153	3.087	3.87	5.862	10.384	6.686	6.028	6.295	7.619	9.606	6.036	4.779	5.578	6.069
LOC105612775	105612775	XM_012181737, XM_012181739, XM_012181740	potassium channel subfamily K member 16-like	7:68195820-68218285:1	10.384	2.154	4.178	5.647	2.435	8.684	4.523	3.834	6.085	7.674	6.933	4.331	2.867	4.352	2.457	9.191	2.632	2.097	6.585	4.27	7.261	3.514	3.096	6.11	3.256	8.227	3.329	2.606	4.975	5.095
ENSOARG00000009458	ENSOARG00000009458	ENSOART00000010297.1, ENSOART00000010299.1	aquaporin 7	2:37548787-37564903:1	8.374	6.762	4.471	4.679	5.377	8.731	4.947	4.243	5.06	10.386	9.155	6.137	3.716	4.129	5.392	7.843	5.55	4.593	4.644	6.096	7.482	5.943	5.518	5.512	7.415	8.378	6.48	3.36	4.521	9.244
PWWP2A	ENSOARG00000013222	ENSOART00000014375.1, XM_012179303	PWWP domain containing 2A	5:69008189-69028273:-1	6.353	10.388	6.987	6.184	3.172	6.416	8.352	7.776	6.202	5.513	7.081	8.659	7.729	6.866	3.197	5.75	7.416	6.415	5.925	3.997	5.265	7.534	4.784	5.152	3.927	6.441	8.516	6.114	5.403	4.853
PLA2G6	ENSOARG00000015125	ENSOART00000016461.1, ENSOART00000016465.1, XM_004006987, XM_012175632, XM_012175633, XM_012175634, XM_012175635, XM_012175636	phospholipase A2, group VI (cytosolic, calcium-independent)	3:213880306-213936288:-1	5.89	7.457	3.222	1.974	4.818	7.065	8.483	5.067	2.639	9.393	3.165	4.8	2.114	1.429	2.419	6.181	9.075	5.352	2.844	6.311	5.838	10.392	7.369	3.475	6.52	5.652	9.744	5.816	2.823	7.416
KCNK6	ENSOARG00000005574	ENSOART00000006071.1	potassium two pore domain channel subfamily K member 6	14:47318447-47326683:1	3.201	2.513	1.499	1.148	6.734	2.6	2.803	2.31	2.77	10.394	3.866	2.837	0.962	1.452	6.512	1.87	3.264	3.323	4.365	5.866	2.966	3.002	2.521	3.863	9.803	2.665	2.138	0.945	1.378	5.87
ENSOARG00000010785	ENSOARG00000010785	ENSOART00000011731.1	no description available	JH923649.1:113-3679:1	2.993	7.799	6.477	3.574	6.938	2.302	10.4	8.051	2.55	8.26	2.747	5.962	5.965	2.55	6.816	1.909	4.773	7.801	3.448	5.672	2.893	6.224	8.454	3	5.807	2.084	5.31	5.501	2.383	5.948
KIAA1109	ENSOARG00000000316	ENSOART00000000336.1, XM_004017275, XM_012097536, XM_012097537, XM_012097538, XM_012097539, XM_012097540, XM_012097541, XM_012097542, XM_012097543	KIAA1109 ortholog	17:35025242-35229375:-1	10.325	5.07	4.09	10.403	4.216	8.362	4.282	3.266	7.514	3.727	10.272	4.943	3.572	9.257	3.55	7.077	4.734	4.43	8.202	2.84	7.253	2.754	2.502	6.39	2.907	8.377	3.57	3.182	8.969	4.397
APAF1	ENSOARG00000013137	ENSOART00000014284.1, XM_004006637, XM_012174845, XM_012174846, XM_012174848, XM_012174849, XM_012174850, XM_012174851, XM_012174852	apoptotic peptidase activating factor 1	3:167840782-167896181:1	8.99	2.49	2.543	7.069	3.165	9.468	2.835	4.206	7.587	4.022	9.876	2.744	1.95	8.605	3.335	9.233	3.627	3.686	10.404	4.118	8.778	3.694	4.447	7.858	4.436	9.872	2.458	3.087	7.49	4.563
GPR158	ENSOARG00000003825	ENSOART00000004158.1, XM_004014228	G protein-coupled receptor 158	13:25018562-25322147:1	0.256	1.518	1.099	0.511	0.083	3.117	6.494	10.408	7.912	0.438	0.145	0.549	0.786	0.76	0.01	1.729	2.574	1.677	1.514	0.175	3.098	4.88	5.087	2.067	0.204	3.591	6.081	5.9	2.454	0.284
PMEPA1	ENSOARG00000017358	ENSOART00000018894.1, XM_012189439	prostate transmembrane protein, androgen induced 1	13:57772343-57834556:1	4.128	8.01	6.213	2.919	8.528	4.399	10.027	10.408	6.733	6.573	2.248	3.279	2.687	1.871	1.372	1.466	3.044	4.161	2.355	2.238	4.052	6.656	7.962	6.448	4.481	1.714	4.692	4.846	3.168	3.306
ARL14EPL	ENSOARG00000016507	ENSOART00000017975.1	ADP ribosylation factor like GTPase 14 effector protein like [Source:NCBI gene;Acc:616348] (assigned to orthologue: ENSBTAG00000039618)	7:4727770-4735605:1	0	0.395	3.119	1.598	0.249	0	0.879	2.133	2.35	0	0	0.169	10.411	5.652	0.376	0	0	1.273	0.253	0	0.07	0	0.998	0.952	0.084	0	0.137	0.474	0.58	0.124
ITPR3	ENSOARG00000010180	ENSOART00000011087.1, XM_012101413	inositol 1,4,5-trisphosphate receptor, type 3	20:7863918-7918764:1	5.558	7.125	5.486	2.511	7.468	2.984	4.442	2.797	1.063	7.41	6.02	7.826	4.339	1.634	6.002	2.206	3.027	1.821	1.129	4.088	5.229	8.681	6.249	3.887	10.412	2.45	3.138	2.197	1.285	3.545
ENSOARG00000020168	ENSOARG00000020168	ENSOART00000021957.1	no description available	9:31920127-31920345:1	1.217	1.025	0.551	0	0.963	4.426	2.859	5.463	4.731	3.386	2.586	0	0	1.46	0	7.531	3.898	7.389	5.047	10.413	2.315	2.037	1.284	0.756	0.641	0.937	2.492	1.21	1.517	0.503
GASK1B	ENSOARG00000006033	ENSOART00000006555.1	golgi associated kinase 1B	17:40532415-40599100:1	1.928	1.109	1.077	0.911	0.986	6.892	2.499	1.385	3.813	3.093	8.038	3.152	1.624	4.797	1.3	3.398	1.444	1.209	1.438	2.164	8.544	3.943	2.235	3.065	5.042	9.377	3.437	2.023	4.545	10.414
ENSOARG00000004529	ENSOARG00000004529	ENSOART00000004926.1	no description available	X:43187759-43188362:1	8.189	4.246	4.436	3.26	6.285	8.431	4.343	5.377	3.159	9.799	4.335	3.932	5.523	3.11	2.1	7.452	6.784	4.613	2.764	6.693	10.418	6.315	6.619	7.357	7.701	8.805	4.668	7.922	5.936	8.935
TMEM42	ENSOARG00000011385	ENSOART00000012374.1, XM_012100374	transmembrane protein 42	19:54172944-54177129:-1	7.242	4.028	3.478	3.886	5.61	6.028	4.663	4.27	6.783	8.676	7.781	4.372	2.153	4.663	6.892	6.454	4.689	6.181	9.004	9.754	8.546	6.035	4.861	7.712	10.42	8.009	4.615	4.621	4.819	7.087
ENSOARG00000012610	ENSOARG00000012610	ENSOART00000013708.1	no description available	10:32843693-32845526:-1	1.173	0.848	0	3.173	0.394	2.683	4.168	3.874	10.421	0	3.367	4.964	0.94	6.754	0.705	1.878	0.791	0	4.244	0.447	3.037	1.428	1.115	3.696	0	1.851	0.448	0.51	5.015	0.785
B3GALT4	ENSOARG00000009145	ENSOART00000009955.1, XM_012100475, XM_012100476	UDP-Gal:betaGlcNAc beta 1,3-galactosyltransferase, polypeptide 4	20:7549192-7551786:1	6.908	4.778	2.055	1.428	6.114	8.675	5.254	2.885	2.34	8.149	7.121	4.68	0.908	1.938	5.457	9.405	6.659	4.193	5.126	7.851	8.366	5.548	3.573	3.977	10.424	6.992	4.762	2.355	2.243	8.115
CDC6	ENSOARG00000014063	ENSOART00000015318.1, XM_004012860, XM_004012861, XM_012186065	cell division cycle 6	11:40114705-40125785:1	7.454	3.346	0.865	1.813	3.795	9.134	2.926	1.353	1.885	7.839	10.1	2.652	0.978	3.216	2.351	5.767	2.904	0.589	1.987	5.269	8.411	2.544	2.479	2.919	5.673	10.425	2.987	1.701	2.727	5.511
HSPB8	ENSOARG00000001872	ENSOART00000002011.1, XM_004017375	heat shock 22kDa protein 8	17:55713533-55727025:-1	0.219	1.764	0.889	0.425	1.158	0.285	2.754	1.381	0.61	1.144	0.08	0.419	0.209	0.144	0.318	1.921	8.116	10.425	3.354	4.269	1.21	3.017	2.659	2.052	3.649	1.026	3.234	4.356	2.466	1.791
RCBTB2	ENSOARG00000008336	ENSOART00000009069.1, XM_012184434, XM_012184435, XM_012184436, XM_012184437, XM_012184438, XM_012184439, XM_012184440, XM_012184441, XM_012184442, XM_012184443, XM_012184444, XM_012184445, XM_012184446, XM_012184447	regulator of chromosome condensation (RCC1) and BTB (POZ) domain containing protein 2	10:18567068-18589772:-1	7.601	3.183	4.03	6.941	7.333	5.774	3.796	4.902	9.204	9.594	9.361	5.533	4.429	9.71	10.425	4.447	2.887	4.544	9.428	5.4	5.874	4.796	5.995	8.633	5.45	7.009	3.835	5.205	6.26	6.189
FLAD1	ENSOARG00000003310	ENSOART00000003589.1, XM_012182562, XM_012182563, XM_012182568, XM_012182577, XM_012182586, XM_012182591, XM_012182592, XM_012182596	flavin adenine dinucleotide synthetase 1	1:103777947-103783749:1	9.456	6.994	4.862	6.613	8.066	8.829	6.713	6.048	8.526	10.433	9.19	5.096	3.474	6.578	5.808	7.937	6.233	7.386	8.766	9.061	10.111	8.326	8.46	9.187	9.993	8.422	7.135	5.613	7.189	7.19
LAYN	ENSOARG00000014248	ENSOART00000015523.1, XM_012095435	layilin	15:21290866-21311718:1	10.115	5.75	3.025	2.723	1.655	8.58	4.2	3.25	2.508	3.42	3.701	1.908	3.283	2.587	0.981	10.438	5.343	5.38	5.495	3.862	8.293	4.65	3.893	2.989	4.252	6.389	3.562	2.149	1.58	2.698
PEX1	ENSOARG00000018309	ENSOART00000019929.1, XM_012177412	peroxisomal biogenesis factor 1	4:9694053-9758953:-1	10.438	3.712	2.414	4.199	5.06	7.846	3.235	2.693	6.252	7.247	10.01	4.254	1.706	4.243	3.314	7.98	5.16	3.228	6.243	5.386	8.605	4.15	3.71	6.321	5.328	5.216	2.361	1.671	3.419	3.302
DENND1A	101113668	XM_004007180, XM_012163241, XM_012163251, XM_012163255, XM_012163262, XM_012163265, XM_012163283	DENN/MADD domain containing 1A	3:11820669-12313882:1	2.093	5.269	2.443	0.982	7.78	1.759	5.575	2.221	0.681	10.446	3.154	5.837	2.406	0.977	5.981	2.087	4.731	3.104	1.656	8.132	1.795	6.81	4.013	2.161	8.979	1.842	6.412	3.15	0.872	8.925
GCFC2	ENSOARG00000001034	ENSOART00000001114.1, XM_004005926, XM_012170683, XM_012170688, XM_012170693, XM_012170696, XM_012170703, XM_012170716	GC-rich sequence DNA-binding factor 2	3:62660754-62705430:-1	8.135	3.709	3.167	8.738	2.476	8.126	3.649	4.983	9.763	3.829	9.063	2.906	4.603	10.448	3.818	8.001	2.408	3.775	8.794	3.03	6.105	3.48	4.641	8.522	2.517	7.041	2.441	3.147	8.253	3.569
MAP4K5	ENSOARG00000020647	ENSOART00000022494.1, XM_012181324, XM_012181325, XM_012181326, XM_012181327	mitogen-activated protein kinase kinase kinase kinase 5	7:40390160-40458578:-1	7.254	4.553	4.282	6.656	6.26	7.732	5.322	6.583	10.453	9.861	9.003	5.478	3.703	5.569	5.526	6.976	4.82	3.387	6.523	6.127	7.663	5.736	6.479	7.961	5.96	8.747	5.818	5.47	7.852	8.892
PHF12	ENSOARG00000005023	ENSOART00000005472.1, XM_004012512, XM_012185409	PHD finger protein 12	11:19902622-19940299:-1	4.432	2.493	3.747	3.251	8.306	3.539	2.274	4.782	3.019	10.453	5.269	2.022	2.516	3.435	10.216	2.94	2.897	3.711	3.803	8.412	4.052	3.459	5.759	4.736	8.002	3.588	2.87	4.187	2.877	8.574
ENSOARG00000009552	ENSOARG00000009552	ENSOART00000010410.1	no description available	20:27016476-27019529:1	0.844	0.842	0.708	0.845	1.456	3.848	4.346	4.778	3.177	6.654	4.69	3.946	6.103	5.734	4.137	7.958	2.271	4.326	10.367	3.791	5.81	3.165	2.556	7.023	3.67	10.459	4.305	3.816	10.396	6.18
LOC101121820	101121820	XM_004003552, XM_012159182	cytochrome P450 2J2-like	1:34499165-34526183:-1	2.817	2.228	5.486	6.072	1.106	3.354	3.17	1.062	6.084	3.614	3.791	3.665	8.733	9.689	1.686	4.312	2.908	6.35	10.46	2.797	6.427	3.498	4.537	8.863	5.791	5.01	2.505	2.768	4.062	2.684
VPRBP	101117795	XM_012099989, XM_012099990, XM_012099991, XM_012099992, XM_012099994, XM_012099995, XM_012099996, XM_012099997	Vpr (HIV-1) binding protein	19:49257300-49330020:1	9.122	7.189	7.176	5.817	7.635	6.767	6.714	10.047	7.567	10.462	9.754	6.755	5.496	5.16	6.544	7.349	7.764	6.468	6.061	7.349	6.28	6.66	8.65	6.685	7.571	8.473	8.165	8.811	6.455	9.096
FAM173A	101111148	XM_012103929, XM_012103930	family with sequence similarity 173, member A	24:566703-568172:1	6.408	2.757	1.845	3.639	2.65	9.656	3.117	3.254	5.702	9.251	7.258	2.238	0.976	2.746	2.838	7.494	5.601	6.609	6.358	7.343	9.106	6.653	6.356	10.465	9.079	8.158	4.526	6.518	5.379	7.636
TRIM36	ENSOARG00000016302	ENSOART00000017752.1, ENSOART00000017756.1, XM_012180631	tripartite motif containing 36	7:3738703-3769884:-1	6.696	9.674	8.341	7.638	5.327	6.454	8.04	6.067	5.324	5.718	7.605	10.05	10.077	10.467	7.225	4.038	3.423	3.339	4.883	2.867	5.35	7.776	4.08	4.959	4.183	5.299	7.889	6.687	5.763	3.867
DDX28	ENSOARG00000003313	ENSOART00000003593.1, XM_004015599	DEAD (Asp-Glu-Ala-Asp) box polypeptide 28	14:34816909-34818806:-1	9.046	4.672	4.496	6.635	5.417	9.145	4.924	6.394	9.686	6.566	10.388	3.541	3.794	7.167	4.081	10.472	5.451	6.537	8.375	6.138	9.087	4.671	5.775	8.774	6.813	8.936	3.535	5.135	7.957	5.624
WDR6	ENSOARG00000015805	ENSOART00000017206.1, XM_012100081, XM_012100082	WD repeat domain 6	19:50923344-50931598:-1	4.008	3.122	1.421	1.333	7.053	4.28	2.601	1.855	1.948	10.473	6.963	3.502	0.884	1.306	5.05	3.441	2.974	1.564	1.576	5.963	4.542	3.953	2.446	2.714	6.779	4.252	3.108	1.804	1.481	6.582
C1H1orf123	101118570	XM_012147200	chromosome 1 open reading frame, human C1orf123	1:27499461-27504803:-1	5.186	3.866	4.22	2.492	1.257	8.025	10.476	7.05	6.4	5.731	7.695	4.558	1.747	3.574	2.699	6.019	8.345	2.161	4.377	3.043	3.221	2.846	5.193	4.163	3.776	6.401	4.337	2.55	3.551	4.967
MTRR	ENSOARG00000014485	ENSOART00000015772.1, XM_012097173	5-methyltetrahydrofolate-homocysteine methyltransferase reductase	16:65201872-65232144:-1	8.325	5.111	4.535	6.351	6.309	6.502	5.102	8.107	10.476	8.05	9.066	4.455	3.068	6.378	4.477	6.042	4.886	5.11	7.648	6.055	7.628	5.3	7.174	8.492	5.928	7.818	4.423	6.016	8.526	8.029
PPP1R12C	101122546	XM_012094774, XM_012094775, XM_012094776	protein phosphatase 1, regulatory subunit 12C	14:59572224-59575615:1	4.873	6.04	3.147	0.727	7.193	6.263	5.74	6.011	4.924	10.491	6.064	4.625	1.452	3.391	5.445	2.707	5.971	5.585	4.403	4.404	5.625	5.735	6.722	6.268	6.447	5.861	4.615	5.05	4.603	7.617
FITM2	ENSOARG00000003850	ENSOART00000004184.1	fat storage inducing transmembrane protein 2	13:72307620-72310929:-1	5.257	5.379	5.646	5.069	6.129	3.825	6.498	10.496	7.94	8.291	5.411	3.255	3.437	2.512	3.686	3.835	4.466	6.099	4.746	5.018	4.42	7.013	9.615	5.902	5.286	5.812	7.755	8.188	6.39	6.782
ENSOARG00000014427	ENSOARG00000014427	ENSOART00000015706.1	no description available	21:6700669-6702504:-1	7.16	6.669	6.419	6.421	4.442	1.085	1.847	1.417	0.114	0	2.024	1.611	0.156	1.544	0.602	2.484	10.342	10.482	10.5	1.129	3.201	4.519	2.992	3.697	1.024	5.126	8.789	6.005	6.064	5.049
FAN1	ENSOARG00000016093	ENSOART00000017531.1, XM_012098588	FANCD2/FANCI-associated nuclease 1	18:26391939-26413687:1	9.964	4.624	2.224	3.971	5.26	8.635	4.128	2.965	5.878	7.076	9.505	3.904	1.014	3.286	2.389	9.787	5.573	3.701	6.735	7.687	10.5	5.856	4.479	7.824	7.92	8.705	4.04	2.178	5.002	6.387
CEP170B	105603316	XM_012099204	centrosomal protein 170B	18:68056948-68057697:1	8.186	8.214	6.023	4.292	10.247	5.925	8.686	3.849	2.727	10.501	8.215	8.019	2.612	2.672	7.754	5.526	4.017	4.77	3.655	5.845	6.134	8.388	5.263	4.114	5.159	4.151	6.592	3.472	3.267	9.449
NCDN	ENSOARG00000019499	ENSOART00000021237.1, XM_004003475	neurochondrin	1:10300724-10309556:1	3.262	5.447	8.132	5.071	5.517	2.503	5.094	8.277	5.114	5.905	4.002	5.721	5.297	3.45	4.361	2.748	6.324	6.46	4.458	4.869	3.738	7.329	10.505	5.789	5.655	4.572	9.403	9.691	5.653	5.868
RGP1	ENSOARG00000011797	ENSOART00000012830.1, ENSOART00000012832.1, XM_012121397	RGP1 retrograde golgi transport homolog (S. cerevisiae)	2:52481224-52485096:-1	5.596	6.649	5.713	4.704	10.512	5.586	7.838	9.072	7.286	9.074	7.021	6.986	5.007	5.189	7.683	5.807	10.106	9.286	7.133	8.234	5.757	7.672	9.093	7.749	9.107	5.511	7.59	6.799	6.161	9.033
LOC101106844	101106844	XM_004009328	EGF-like module-containing mucin-like hormone receptor-like 4	5:15141817-15183298:-1	2.517	0.614	1.549	3.17	0.522	2.195	0.241	0.745	2.418	0	2.302	1.717	5.423	10.516	1.837	2.259	1.653	3.494	6.652	0.826	2.355	0.44	0.904	2.147	1.029	1.972	0.461	1.256	2.845	0.56
TMED8	ENSOARG00000002443	ENSOART00000002650.1, XM_012182351	transmembrane emp24 protein transport domain containing 8	7:85515023-85529082:-1	8.436	4.268	2.626	5.349	5.545	8.099	4.805	3.892	5.595	9.623	9.731	4.772	1.989	3.919	4.969	7.055	3.794	5.022	5.972	5.415	8.435	3.722	4.723	5.254	6.18	10.516	3.801	3.128	4.88	7.879
LOC101116994	101116994	XM_012182246	uncharacterized protein C15orf43 homolog	7:100002909-100070837:1	8.618	3.71	4.985	8.208	4.179	8.237	5.164	3.875	9.298	2.801	10.131	4.098	6.319	10.522	2.891	6.121	4.188	5.141	8.885	3.499	7.587	2.544	3.326	6.591	2.366	8.825	1.577	2.513	7.902	2.591
ZNF292	ENSOARG00000013132	ENSOART00000014272.1, XM_012182812, XM_012182813, XM_012182814, XM_012182815	zinc finger protein 292	8:49750281-49772242:-1	8.274	3.157	3.747	7.915	5.209	10.522	3.163	5.045	8.501	6.337	10.121	2.75	3.113	8.556	6.559	9.089	3.046	3.492	8.704	4.771	8.928	4.185	5.349	8.928	5.396	8.903	2.506	4.26	8.367	6.808
FBXO31	ENSOARG00000011734	ENSOART00000012763.1, XM_012189650, XM_012189651, XM_012189652, XM_012189653	F-box protein 31	14:12415517-12430050:-1	6.827	5.206	3.879	3.873	6.698	6.262	4.627	5.807	6.416	10.525	6.689	3.885	2.974	2.218	2.57	6.101	5.881	4.657	4.372	5.362	7.082	7.421	7.349	6.866	7.508	7.965	7.366	4.655	5.324	7.208
ZNF234	ENSOARG00000008999	ENSOART00000009799.1	zinc finger protein 234	14:51188443-51195154:1	8.336	3.756	4.372	7.127	3.232	8.816	4.982	7.472	10.525	5.531	8.095	2.045	2.747	5.723	2.731	6.47	4.01	3.941	7.035	3.122	5.616	3.57	5.236	6.718	4.265	8.669	2.856	4.639	8.406	4.94
LCLAT1	ENSOARG00000019640	ENSOART00000021388.1, XM_004005798, XM_012167334	lysocardiolipin acyltransferase 1	3:37227566-37358751:1	7.077	6.223	5.093	5.997	3.282	7.855	8.352	9.648	10.531	6.38	9.694	7.903	7.4	9.354	2.954	7.847	5.641	6.755	8.28	6.172	7.536	7.048	6.797	8.165	5.747	9.677	6.224	6.301	10.025	7.862
CLEC12A	101119973	XM_004006880, XM_012175413	C-type lectin domain family 12, member A	3:204585692-204598966:1	3.113	2.242	1.164	2.639	2.05	5.011	2.891	2.127	3.64	5.023	10.532	3.762	3.868	2.991	2.115	3.012	1.862	2.063	1.89	3.319	6.211	3.711	3.058	6.408	7.067	9.623	5.56	4.609	7.529	8.204
ENSOARG00000010879	ENSOARG00000010879	ENSOART00000011832.1	no description available	6:85209776-85214908:1	7.625	7.767	8.663	10.537	7.299	4.57	8.417	8.82	8.462	7.46	5.119	9.989	9.992	9.799	6.043	3.922	7.613	4.553	6.092	2.921	4.409	6.255	6.395	6.308	3.153	6.424	8.411	8.904	10.249	6.007
NARFL	101104879	XM_012103935	nuclear prelamin A recognition factor-like	24:576109-581740:-1	6.795	3.79	3.139	3.949	4.428	8.583	4.259	5.505	6.915	10.537	8.808	4.094	2.548	3.497	2.541	6.87	2.205	3.745	6.295	4.482	7.983	5.307	5.044	6.181	5.784	7.288	3.72	3.375	5.456	5.597
TACSTD2	ENSOARG00000008349	ENSOART00000009081.1, ENSOART00000009082.1, XM_004023556	tumor-associated calcium signal transducer 2	1:33053385-33055232:-1	8.179	4.249	3.4	6.779	3.593	10.537	6.573	5.147	7.86	5.308	8.391	4.662	4.984	6.422	2.907	7.253	4.748	4.763	7.55	3.576	8.104	4.18	4.121	7.037	4.129	7.69	3.871	3.505	6.162	4.18
ENSOARG00000018199	ENSOARG00000018199	ENSOART00000019801.1	no description available	4:106421225-106433714:-1	2.25	1.021	2.942	4.12	7.111	0.159	0.245	1.382	1.673	0.734	1.571	0.743	1.957	2.923	3.546	0.801	0.596	4.32	3.331	1.435	1.278	1.031	7.278	10.54	4.004	0.282	0.205	1.805	2.847	1.191
ASH1L	ENSOARG00000004448	ENSOART00000004848.1, XM_004002591, XM_012182855, XM_012182863, XM_012182871, XM_012182882, XM_012182890, XM_012182899, XM_012182906	ash1 (absent, small, or homeotic)-like (Drosophila)	1:104080148-104203180:-1	10.177	5.193	7.161	9.38	6.673	10.376	5.937	8.696	9.8	8.704	10.543	5.09	6.308	8.766	6.119	10.477	5.977	6.283	10.214	6.303	8.779	6.15	8.615	8.057	5.918	10.291	6.107	7.779	9.088	6.88
CYREN	ENSOARG00000008220	ENSOART00000008947.1	cell cycle regulator of NHEJ	4:98788726-98791452:-1	4.537	4.419	3.778	3.35	6.504	5.44	6.763	5.823	5.63	9.849	7.269	4.301	3.306	3.693	6.61	5.032	9.941	8.936	5.659	8.92	5.035	6.078	7.936	4.852	8.631	5.93	7.396	6.594	3.842	10.548
IGIP	ENSOARG00000013639	ENSOART00000014839.1	IgA inducing protein	5:48704500-48704640:1	10.548	0	1.609	0.746	2.763	4.343	0	1.808	3.007	5.013	9.091	1.84	0	1.227	5.677	3.646	0	3.698	2.709	5.008	7.57	1.513	0	2.188	5.759	8.932	2.86	1.773	1.635	5.502
LOC101123118	101123118	XM_004009129	ADP-ribosylation factor 1-like	5:2716979-2717539:-1	6.813	4.663	3.187	4.804	4.133	7.293	4.358	1.656	3.549	4.941	6.958	8.055	4.191	4.812	4.401	9.869	4.535	2.057	5.911	4.09	10.549	2.983	4.528	7.286	8.504	8.024	6.399	3.711	5.086	6.48
FOXP4	ENSOARG00000002055	ENSOART00000002216.1	forkhead box P4	20:15472349-15510472:1	2.114	7.359	5.707	1.386	4.027	1.738	10.551	6.069	0.994	8.938	2.02	5.923	3.29	0.642	2.706	1.573	4.68	4.271	0.751	5.47	1.785	6.975	5.692	1.468	5.254	1.664	7.311	4.574	0.731	5.814
UFD1L	101121123	XM_012098113, XM_012098114, XM_012098115, XM_012098116, XM_012098117, XM_012098118	ubiquitin fusion degradation 1 like (yeast)	17:71890576-71898323:-1	5.464	9.36	6.864	6.773	7.258	7.64	8.645	10.138	6.485	10.554	6.75	7.013	5.313	4.125	6.265	7.036	6.649	7.85	4.749	8.84	5.033	8.743	10.443	5.418	8.41	5.599	7.682	6.03	4.782	6.09
VSTM4	ENSOARG00000001870	ENSOART00000002012.1	V-set and transmembrane domain containing 4	25:42880833-42952961:-1	0.499	1.274	0.69	0.595	0.647	3.701	10.555	7.906	8.815	3.149	1.34	1.503	1.836	2.645	1.326	1.326	0.929	1.973	2.769	1.816	1.078	1.318	1.111	0.791	0.477	1.231	1.146	0.709	0.585	1.541
OCEL1	ENSOARG00000017721	ENSOART00000019283.1, ENSOART00000019285.1, XM_012177718, XM_012177719	occludin/ELL domain containing 1	5:5607725-5609846:-1	8.661	10.558	4.3	2.903	4.505	8.971	8.524	5.561	3.23	6.442	5.088	6.469	2.618	1.377	3.688	8.027	5.272	4.014	4.257	7.402	7.122	7.055	5.406	3.36	4.325	4.135	3.747	3.236	1.891	4.175
ENSOARG00000014825	ENSOARG00000014825	ENSOART00000016133.1	no description available	22:13149226-13149429:-1	1.064	1.807	0.644	0	0	0	4.657	9.239	0.961	1.982	0.275	0	2.11	0.487	0	1.171	3.433	7.256	1.339	1.36	2.105	4.773	10.565	3.533	2.642	0.821	2.912	2.13	0.884	1.179
METTL18	ENSOARG00000005115	ENSOART00000005570.1	methyltransferase like 18	12:35601642-35602763:-1	6.166	2.179	3.473	5.789	2.983	6.931	3.737	7.631	10.572	4.744	6.882	3.118	3.628	5.974	2.56	6.447	3.996	5.087	8.238	5.771	9.549	5.033	5.916	10.2	5.733	8.414	2.557	6.164	9.363	5.62
RAB40C	ENSOARG00000012511	ENSOART00000013604.1, XM_012104698	RAB40C, member RAS oncogene family	24:458298-470358:1	8.624	4.856	3.401	6.783	8.756	8.672	6.404	7.077	10.055	9.21	8.472	3.027	3.191	7.064	7.822	6.012	3.925	5.45	8.324	6.828	7.947	5.257	8.183	10.575	6.406	8.505	4.715	6.341	9.044	6.398
LNP1	ENSOARG00000018021	ENSOART00000019615.1, XM_004002881, XM_012188696, XM_012188703, XM_012188706, XM_012188710, XM_012188723, XM_012188727, XM_012188733, XM_012188739, XM_012188749	leukemia NUP98 fusion partner 1	1:163197663-163204921:1	7.003	4.677	1.93	2.729	5.109	3.519	1.96	1.68	2.903	5.024	5.273	3.126	1.559	1.186	1.342	4.682	3.501	2.377	3.174	4.898	10.576	5.6	5.359	7.498	7.95	7.331	5.456	4.65	4.7	7.509
LOC101119765	101119765	XM_012100191	39S ribosomal protein L15, mitochondrial	19:53985923-53991137:1	8.321	8.286	4.022	7.446	6.453	6.931	5.252	6.586	7.253	10.579	6.691	3.978	4.282	3.761	5.5	9.099	7.338	6.984	5.842	8.584	6.033	6.664	8.34	7.589	6.873	8.637	8.354	2.912	8.423	8.28
THTPA	ENSOARG00000019278	ENSOART00000020994.1, XM_012180966, XM_012180967, XM_012180968, XM_012180969	thiamine triphosphatase	7:21006347-21007755:-1	8.986	5.955	4.41	6.142	8.125	8.982	5.976	6.49	9.415	8.749	9.446	4.759	3.736	7.466	6.981	7.406	6.961	7.223	9.244	7.273	8.776	9.127	7.161	10.585	7.679	8.259	4.895	5.872	6.827	6.869
KIF27	ENSOARG00000008971	ENSOART00000009775.1, XM_004004112, XM_012117516, XM_012117525, XM_012117535, XM_012117552, XM_012117564, XM_012117569, XM_012117580, XM_012117587, XM_012117598	kinesin family member 27	2:35605653-35688171:1	10.587	2.766	1.696	4.024	3.465	9.22	2.686	2.257	4.421	3.625	6.608	2.78	1.666	3.54	1.534	6.426	2.409	1.961	5.139	2.824	7.828	2.863	1.829	4.25	3.191	8.385	2.421	1.9	4.487	4.08
CNNM4	ENSOARG00000013780	ENSOART00000014994.1, ENSOART00000014995.1, ENSOART00000014997.1, XM_012173827	cyclin and CBS domain divalent metal cation transport mediator 4	3:103639304-103675903:-1	5.989	6.992	3.561	2.622	5.92	5.968	6.938	4.042	3.428	10.588	7.577	8.438	3.767	2.455	4.213	5.451	5.534	4.335	4.048	6.759	6.012	7.353	5.08	4.337	8.113	6.329	6.449	3.348	3.022	7.948
SFXN2	ENSOARG00000001822	ENSOART00000001957.1, XM_004020149, XM_012102861, XM_012102862	sideroflexin 2	22:22468822-22486728:1	5.791	3.993	1.865	2.309	4.02	7.061	3.87	3.289	5.215	7.205	7.768	4.378	1.322	1.802	1.685	6.509	3.642	3.01	2.711	5.751	6.982	4.988	3.936	5.47	6.543	10.593	5.655	4.179	4.792	8.18
ALS2	ENSOARG00000017445	ENSOART00000018995.1, XM_012142690	amyotrophic lateral sclerosis 2 (juvenile)	2:202925505-202986999:-1	7.9	4.346	3.363	3.338	4.297	9.321	6.322	5.35	4.689	10.596	10.131	6.48	3.868	3.824	3.942	7.732	3.477	2.992	4.882	6.533	6.583	4.844	3.963	4.964	5.408	9.155	5.522	5.026	5.143	7.862
TRIM3	ENSOARG00000018257	ENSOART00000019866.1, XM_012095887	tripartite motif containing 3	15:45990086-46007118:1	4.366	3.511	1.822	1.46	5.717	5.488	4.041	1.725	1.642	10.596	4.156	2.761	0.711	0.856	3.837	3.361	2.32	0.833	1.401	4.742	4.206	3.626	2.213	1.916	4.292	2.694	2.04	0.698	0.76	3.872
TCFL5	ENSOARG00000012065	ENSOART00000013125.1, XM_012188858	transcription factor-like 5 (basic helix-loop-helix)	13:53839432-53855800:1	10.599	5.302	3.326	5.242	5.947	9.489	5.092	3.169	6.102	8.117	10.284	5.25	2.931	3.035	3.921	8.058	4.095	3.03	6.871	7.938	9.588	6.21	6.804	8.292	7.906	8.057	5.214	3.711	6.272	6.557
DUS4L	ENSOARG00000005713	ENSOART00000006220.1	dihydrouridine synthase 4 like	4:48599948-48609713:1	7.392	4.232	4.856	6.624	4.379	6.168	4.504	6.802	10.6	6.677	7.676	4.138	4.638	5.784	4.1	5.829	4.118	5.074	6.846	6.224	8.08	4.889	5.397	7.808	6.469	9.529	5.12	5.043	8.928	7.202
PDDC1	101102104	XM_012102413	Parkinson disease 7 domain containing 1	21:49351502-49358007:1	5.197	5.412	3.336	4.039	4.889	5.451	6.366	4.941	4.556	10.601	5.86	4.275	2.836	2.777	4.993	4.829	3.775	4.566	4.135	5.65	6.005	7.28	8.37	5.182	7.155	4.835	5.311	3.237	4.29	7.998
DFFB	ENSOARG00000014597	ENSOART00000015890.1	DNA fragmentation factor subunit beta	12:47346448-47358957:-1	6.521	3.802	2.816	4.843	5.598	8.246	4.8	6.274	10.608	8.111	6.463	2.437	1.663	3.735	2.733	5.473	2.6	2.791	5.189	4.759	7.351	5.073	7.455	8.956	5.699	7.296	3.302	4.162	6.997	5.767
ENSOARG00000004667	ENSOARG00000004667	ENSOART00000005075.1	60S ribosomal protein L6	17:56669722-56670585:-1	5.334	4.197	4.13	5.857	2.803	5.246	2.496	5.335	5.662	4.704	5.909	3.544	5.157	3.869	2.642	3.66	2.172	2.39	3.894	1.123	6.75	10.608	5.654	5.551	5.955	5.893	3.299	2.6	7.058	2.694
EHBP1	ENSOARG00000020108	ENSOART00000021893.1, ENSOART00000021895.1, XM_004005849	EH domain binding protein 1	3:45067845-45423479:-1	3.602	4.031	2.026	2.636	5.402	6.161	5.569	4.541	10.612	7.473	2.51	2.795	1.558	2.578	2.415	4.587	3.243	1.221	2.566	2.61	5.829	6.077	4.8	5.283	4.105	6.476	7.41	3.659	4.115	4.103
DUS2	ENSOARG00000003325	ENSOART00000003611.1	dihydrouridine synthase 2	14:34822682-34850831:1	9.226	6.315	4.472	6.4	7.178	8.498	5.472	5.483	8.914	9.285	8.063	5.713	3.336	5.438	4.343	7.445	5.707	4.995	7.487	7.775	10.624	7.018	7.185	9.233	9.327	10.22	7.495	4.396	6.988	8.13
RBMS2	ENSOARG00000008570	ENSOART00000009327.1, ENSOART00000009328.1, XM_004006575, XM_012174727, XM_012174729, XM_012174730, XM_012174731, XM_012174732, XM_012174733, XM_012174734	RNA binding motif, single stranded interacting protein 2	3:162762116-162823200:-1	4.448	8.419	6.156	2.814	8.72	6.323	10.625	9.947	3.716	10.386	4.482	4.434	5.594	3.817	3.619	4.86	6.316	9.191	4.951	6.565	4.369	7.658	5.894	3.046	6.273	4.308	7.358	6.437	2.426	6.782
ENSOARG00000006430	ENSOARG00000006430	ENSOART00000006986.1	no description available	26:5925842-5929696:-1	10.634	3.226	3.449	2.275	6.044	4.157	4.262	0	2.056	1.062	6.77	1.579	0.752	2.602	3.15	1.564	1.226	1.557	1.434	0.73	0.965	0.64	0	1.416	1.616	1.757	2.492	0	2.36	0.628
ADIG	ENSOARG00000019100	ENSOART00000020796.1	adipogenin	13:67064926-67070255:1	5.388	10.636	6.17	4.882	5	4.005	7.788	5.359	2.152	1.359	3.409	4.035	5.782	2.01	2.784	4.856	5.444	5.394	6.653	6.414	4.552	2.452	4.096	4.732	3.071	1.513	1.6	3.368	2.293	2.82
CCDC9	ENSOARG00000010972	ENSOART00000011932.1	coiled-coil domain containing 9	14:53327344-53337291:1	4.241	10.636	7.157	5.347	5.651	4.453	10.384	7.807	3.841	6.014	4.889	9.735	7.533	3.452	5.165	4.865	8.412	7.882	3.97	5.506	3.459	7.666	6.435	3.333	5.275	3.922	8.514	6.667	3.125	5.257
LEMD3	ENSOARG00000003051	ENSOART00000003306.1, XM_012176059	LEM domain containing 3	3:154427167-154498643:-1	9.273	5.31	5.236	8.419	4.324	8.305	4.979	6.818	10.639	6.169	9.337	3.965	4.938	8.957	5.77	7.819	4.984	5.8	9.84	4.728	7.345	5.106	6.724	8.547	5.502	8.06	4.156	5.495	9.312	5.16
CXorf38	ENSOARG00000001464	ENSOART00000001569.1	chromosome X open reading frame 38	X:37848692-37873799:-1	3.295	2.707	1.1	1.684	2.284	10.65	6.159	3.944	4.688	5.448	3.933	2.388	0.815	1.792	1.833	5.012	2.574	2.015	3.412	2.909	5.496	2.112	2.232	3.463	3.207	6.043	3.751	2.147	3.337	3.563
RCOR1	ENSOARG00000004898	ENSOART00000005334.1, XM_004018158	REST corepressor 1	18:66107875-66145325:1	7.35	9.548	10.659	10.058	6.237	6.76	9.802	7.042	6.07	7.218	9.013	7.195	8.141	9.492	6.505	5.279	3.621	5.608	6.547	5.699	7.12	6.726	6.648	7.538	5.035	6.858	4.708	7.41	5.259	6.966
MRNIP	ENSOARG00000002543	ENSOART00000002755.1	MRN complex interacting protein	5:1102455-1119431:1	10.661	6.15	3.972	5.119	7.675	9.341	3.829	4.597	7.226	8.772	7.833	4.087	2.657	4.223	3.049	9.128	5.653	4.345	5.698	8.045	7.555	4.247	3.321	6.935	7.376	6.757	3.693	1.619	3.904	6.576
BARD1	ENSOARG00000019275	ENSOART00000020989.1, XM_012145490	BRCA1 associated RING domain 1	2:215691771-215776097:-1	7.563	2.303	1.716	2.822	3.03	6.412	1.703	1.433	2.342	4.748	10.664	3.383	1.853	4.563	1.804	4.613	1.918	2.215	2.401	3.186	6.127	1.756	1.84	2.473	3.756	9.141	1.683	1.6	2.945	4.364
IGFBP2	ENSOARG00000019417	ENSOART00000021146.1, ENSOART00000021147.1, NM_001009436	insulin-like growth factor binding protein 2, 36kDa	2:217608006-217637005:1	5.428	10.664	6.421	10.23	5.954	1.957	9.977	6.287	2.101	5.81	2.917	4.453	3.914	2.004	4.754	3.467	2.263	3.675	2.738	2.115	3.105	7.615	8.99	2.956	5.852	3.511	8.617	4.043	4.304	5.011
KIF1BP	ENSOARG00000005316	ENSOART00000005795.1	KIF1 binding protein	25:25071795-25129833:1	7.283	9.497	4.962	8.025	8.86	8.432	6.828	10.664	5.757	7.114	9.028	8.672	9.683	7.3	5.041	9.208	3.595	10.42	9.389	6.598	7.628	7.757	6.626	7.625	5.622	8.434	9.278	9.253	7.836	10.37
NOL6	ENSOARG00000009424	ENSOART00000010268.1, XM_004004141	nucleolar protein 6 (RNA-associated)	2:37482612-37494741:1	2.501	5.071	5.661	3.168	6.525	1.729	3.991	8.488	4.639	8.193	3.325	4.695	3.785	1.75	3.432	1.903	4.019	4.261	2.366	5.536	2.995	6.745	10.664	4.18	6.218	2.623	7.649	7.238	3.465	7.14
ENSOARG00000004904	ENSOARG00000004904	ENSOART00000005337.1	no description available	13:73107307-73108440:-1	1.865	0	3.404	4.145	0	0.815	1.84	2.734	4.897	0	0.811	4.865	10.665	6.411	0.578	2.979	5.5	9.917	5.451	0	2.701	2.383	1.596	3.209	3.032	1.769	2.592	4.2	5.646	0
FAM107B	101108149	XM_012188404, XM_012188405	family with sequence similarity 107, member B	13:28246361-28283463:-1	7.531	2.098	1.217	1.185	1.002	1.962	0.666	0.255	0.394	0	10.668	4.398	3.677	3.58	1.315	3.009	0	0.534	2.529	0.24	0.153	0.014	0.174	0.007	1.007	0.351	0	0	0.897	1.623
TAF1B	ENSOARG00000015201	ENSOART00000016543.1, XM_004007205	TATA box binding protein (TBP)-associated factor, RNA polymerase I, B, 63kDa	3:18905668-19023810:1	7.809	4.675	4.357	7.537	5.218	6.233	5.725	6.683	10.668	6.38	9.292	4.11	4.981	8.76	3.637	6.105	4.755	7.185	9.126	5.078	8.493	5.826	7.075	9.189	5.524	10.496	5.605	6.634	9.95	6.262
TMEM240	ENSOARG00000003061	ENSOART00000003313.1, ENSOART00000003314.1, XM_004023327	transmembrane protein 240	12:49148368-49153905:1	7.323	7.356	6.029	5.035	6.727	6.629	5.243	5.051	7.305	7.173	9.696	4.249	3.937	2.938	3.351	7.612	6.982	7.014	3.714	7.888	6.884	7.244	9.152	9.117	8.123	8.857	6.55	6.83	7.342	10.668
PICK1	ENSOARG00000014944	ENSOART00000016271.1, XM_012176153	protein interacting with PRKCA 1	3:213820389-213839823:1	8.194	6.78	4.783	5.34	7.295	6	5.42	5.02	5.218	6.332	8.644	6.858	4.396	4.839	4.99	6.5	6.5	5.972	6.083	7.066	10.036	8.602	8.371	8.85	9.046	10.676	8.309	6.901	7.278	8.671
ENSOARG00000001214	ENSOARG00000001214	ENSOART00000001297.1	no description available	13:37779127-37780135:-1	5.348	4.382	3.232	4.381	3.268	10.678	10.015	4.477	7.774	8.088	5.674	2.476	2.311	4.487	2.921	4.502	2.738	3.489	5.618	3.197	6.981	5.758	5.169	6.138	4.601	7.5	5.297	4.498	4.661	4.878
LINS	101116177	XM_004017713, XM_012098327, XM_012098328, XM_012098329, XM_012098330, XM_012098331, XM_012098332, XM_012098333, XM_012098334, XM_012098335, XM_012098336, XM_012098337, XM_012098338	lines homolog (Drosophila)	18:5160412-5172217:1	9.86	2.454	2.634	4.86	4.91	9.114	2.732	3.229	6.583	7.041	9.817	2.729	2.357	3.381	2.296	6.895	3.179	2.564	5.876	5.31	10.678	3.82	4.354	8.815	6.662	7.709	2.96	2.953	6.778	6.274
POLI	ENSOARG00000004784	ENSOART00000005211.1, XM_012103721, XM_012103723	polymerase (DNA directed) iota	23:53886528-53907027:1	3.682	4.468	3.29	5.532	3.655	4.085	4.998	6.007	10.68	3.996	3.134	2.211	2.608	5.113	3.156	3.7	1.865	5.209	7.628	2.524	4.067	4.181	4.212	5.449	2.733	4.485	2.508	2.325	5.973	3.813
NFYB/ENSOARG00000000468	ENSOARG00000000468	ENSOART00000000498.1	nuclear transcription factor Y subunit beta [Source:HGNC Symbol;Acc:HGNC:7805] (assigned to orthologue: ENSCHIG00000024741)	10:56250347-56254919:1	9.707	5.906	6.755	8.757	4.789	8.962	6.159	6.65	10.106	5.015	10.466	6.002	6.007	9.777	4.047	8.389	5.065	6.083	9.387	4.041	8.852	5.288	5.827	8.227	5.248	10.681	5.941	6.073	8.825	6.304
OCM	101114841	XM_012104626	oncomodulin	24:37826929-37834431:1	2.58	5.561	4.071	3.734	3.686	4.38	10.687	4.262	5.6	5.076	3.633	3.86	2.77	3.122	3.337	3.511	6.753	4.72	6.391	2.322	5.516	7.538	7.141	5.431	4.21	5.473	8.686	9.009	5.988	3.657
GCDH	ENSOARG00000010163	ENSOART00000011061.1, XM_012177832	glutaryl-CoA dehydrogenase	5:10739177-10746054:-1	5.756	6.814	5.615	4.734	2.66	5.163	8.23	5.926	5.087	2.424	3.994	10.688	7.777	5.724	3.053	5.639	8.328	7.841	7.609	2.374	2.871	1.511	1.269	2.288	1.434	4.452	7.145	7.318	4.803	3.091
CHD8	ENSOARG00000019643	ENSOART00000021394.1, XM_004010367	chromodomain helicase DNA binding protein 8	7:22947491-23004593:1	9.482	5.384	6.325	6.714	7.68	7.862	6.188	9.427	7.237	10.685	10.689	4.608	6.118	7.826	6.793	7.895	6.362	7.243	7.451	7.489	7.914	6.55	8.521	7.898	8.464	9.25	4.998	7.452	6.663	9.636
GTPBP8	ENSOARG00000019364	ENSOART00000021088.1, XM_004002923	GTP-binding protein 8 (putative)	1:176073983-176089563:1	8.683	4.417	3.04	6.524	4.232	10.296	6.803	6.718	10.69	7.332	8.19	3.578	3.235	6.563	4.256	7.29	3.725	4.469	9.825	4.872	10.463	5.178	5.584	8.341	6.517	8.91	4.398	4.186	8.067	5.878
ZFP69	ENSOARG00000020260	ENSOART00000022059.1, XM_004001842, XM_012105162, XM_012105219, XM_012105269, XM_012105352, XM_012105401, XM_012105445, XM_012105514, XM_012105582, XM_012105610, XM_012105643	ZFP69 zinc finger protein	1:14836092-14843671:1	9.88	3.199	4.089	8.042	4.591	8.34	2.997	4.438	8.912	6.35	8.266	2.621	2.337	7.035	4.204	8.997	3.899	4.994	10.692	8.166	8.146	3.645	5.253	8.783	5.77	9.068	3.776	4.709	8.778	5.723
PDE4A	ENSOARG00000016237	ENSOART00000017688.1	phosphodiesterase 4A	5:12632550-12672972:1	6.935	5.798	5.748	4.532	10.693	3.653	3.229	2.577	1.528	7.723	8.154	8.392	4.131	3.289	10.064	3.573	4.165	2.451	2.085	7.345	4.011	4.738	3.54	2.826	5.821	2.352	3.546	2.479	1.724	4.798
CEP135	ENSOARG00000003002	ENSOART00000003266.1, XM_012179988	centrosomal protein 135kDa	6:71379274-71449244:1	6.887	3.293	4.051	6.282	2.664	4.837	3.266	3.573	6.808	3.093	8.725	4.766	4.668	8.402	3.294	4.718	1.643	2.685	6.863	2.834	6.193	4.339	4.449	6.618	2.479	10.694	5.129	4.764	8.727	4.672
ENSOARG00000013927	ENSOARG00000013927	ENSOART00000015167.1	ras-related protein Rap-2c-like	18:66561182-66561784:-1	5.937	6.088	1.588	1.397	3.917	4.003	3.113	0.492	0.591	1.334	10.698	6.81	1.729	1.053	4.647	1.694	0.602	0.366	0.449	0.736	1.047	1.55	0.383	0.509	0.794	2.086	0.93	0.181	0.253	1.353
ENSOARG00000019752	ENSOARG00000019752	ENSOART00000021509.1	no description available	3:223825056-223830358:1	7.066	6.493	4.125	3.874	6.606	8.865	7.849	4.148	4.808	10.658	7.436	6.654	2.964	2.881	5.548	10.387	7.292	6.861	6.293	10.698	7.333	6.781	5.202	4.886	8.438	6.585	6.047	4.24	4.004	8.194
TMEM205	ENSOARG00000018172	ENSOART00000019774.1	transmembrane protein 205	5:13418209-13420578:-1	7.781	7.264	6.554	3.584	4.084	9.124	8.039	6.565	6.979	8.539	4.558	4.291	3.423	3.122	1.097	9.396	8.253	6.64	6.618	7.044	10.492	8.981	8.335	7.078	8.268	10.699	6.945	5.711	5.902	9.634
LOC105615587	105615587	XM_012180552	formin-like protein 5	6:116485341-116489895:-1	5.637	8.767	3.652	2.933	5.822	7.559	8.302	3.838	2.132	10.708	6.274	7.252	5.441	1.908	3.677	6.897	7.367	5.679	3.354	8.357	4.492	8.195	6.495	3.789	6.773	5.099	5.815	3.976	2.186	7.259
NDUFAF5	ENSOARG00000011254	ENSOART00000012238.1, XM_004014164	NADH dehydrogenase (ubiquinone) complex I, assembly factor 5	13:6872904-6905212:1	6.748	5	5.96	6.324	4.427	6.699	5.122	8.252	10.708	3.428	7.554	4.812	4.353	6.918	2.664	7.258	7.707	7.957	9.188	6.986	9.689	7.396	5.809	9.163	5.862	8.699	6.232	6.471	10.295	5.326
SUGP1	ENSOARG00000008152	ENSOART00000008873.1, XM_012177666	SURP and G patch domain containing 1	5:3726597-3759400:1	8.215	8.109	6.733	7.103	8.213	8.836	7.844	8.651	8.96	10.708	9.566	8.159	5.744	8.691	7.913	7.746	7.798	8.053	7.787	8.013	9.445	9.028	8.777	9.288	9.016	9.636	6.751	7.004	7.718	9.292
ENSOARG00000007886	ENSOARG00000007886	ENSOART00000008582.1	no description available	19:60222245-60288886:-1	3.884	5.946	2.423	1.463	2.21	10.081	10.712	6.54	5.565	4.28	4.267	4.475	3.603	2.252	3.56	9.919	6.117	10.163	6.4	5.91	7.581	7.803	7.094	5.853	6.413	5.851	4.784	3.949	4.371	4.727
RAD52	ENSOARG00000012465	ENSOART00000013558.1, XM_012175585, XM_012175586, XM_012175587, XM_012175588	RAD52 homolog (S. cerevisiae)	3:211706264-211716493:-1	8.339	4.573	3.059	5.105	5.887	9.644	4.719	4.682	8.83	8.808	10.714	3.605	2.932	5.866	6.013	8.353	3.996	3.968	7.252	6.555	7.107	3.649	3.978	7.909	5.823	6.923	3.203	2.784	5.29	5.079
NACC2	ENSOARG00000004768	ENSOART00000005192.1	NACC family member 2	3:3275515-3312889:1	4.935	8.911	4.892	4.245	7.044	7.988	10.716	6.508	4.548	10.365	6.827	5.929	3.814	2.428	5.757	7.061	6.565	5.905	5.477	8.021	6.095	7.883	7.128	6.471	9.674	6.178	6.677	5.169	4.31	9.736
LOC101121806	101121806	XM_012099017	60S acidic ribosomal protein P1-like	18:59974120-59975701:-1	4.811	0.724	0.259	10.718	0	1.356	0.464	0	1.086	0	3.373	0.525	0.509	1.322	0.222	1.973	0.998	0	3.394	0.226	4.375	0.708	0.339	7.45	0.268	1.116	0.207	0.558	1.163	0.673
GLRB	ENSOARG00000006474	ENSOART00000007035.1, ENSOART00000007037.1, XM_004017291, XM_012097585	glycine receptor, beta	17:41763572-41858701:-1	10.722	2.885	1.549	8.84	1.612	1.777	3.949	2.077	1.869	1.424	1.468	0.802	1.057	1.378	2.249	1.912	1.452	2.881	1.678	0.971	1.867	1.838	2.743	1.551	1.641	1.697	0.778	0.651	2.747	1.814
CEP85L	ENSOARG00000008594	ENSOART00000009358.1, XM_012182517, XM_012182518	centrosomal protein 85kDa-like	8:19468383-19548801:1	10.723	2.37	1.664	5.116	2.473	7.549	3.002	2.908	5.522	2.826	8.796	1.507	1.602	5.334	1.563	6.59	1.261	1.801	6.957	2.622	7.807	3.742	3.159	6.842	3.01	8.336	2.239	1.906	5.466	3.017
LOC105601884	105601884	XM_012184858, XM_012184859	multidrug resistance-associated protein 4-like	10:71664026-71671122:-1	3.918	0.601	1.341	2.499	2.296	10.723	6.302	5.152	6.131	1.055	4.356	0.694	0.709	1.971	0	1.568	3.693	0.726	1.37	1.339	0.923	1.297	1.072	0.933	1.183	2.025	2.173	0	0.466	1.723
LOC101107770	101107770	XM_004022900	squalene synthase-like	AMGL01122942.1:392-2919:1	4.885	0	0	0	0	5.795	0	4.86	2.41	9.944	1.145	0	0	0	0	10.73	0	0	0	4.664	5.579	1.056	1.765	0.153	2.001	7.989	0	8.168	7.791	10.073
CDC14B	101110906	XM_012116340, XM_012116349, XM_012116359, XM_012116369, XM_012116379, XM_012116390, XM_012116399, XM_012116403, XM_012116407, XM_012116425	cell division cycle 14B	2:29482389-29533516:1	10.171	5.049	2.215	4.487	6.833	9.45	3.028	3.157	7.699	6.542	9.66	3.548	1.314	4.797	5.318	10.366	3.367	4.616	9.882	6.306	8.054	4.472	3.998	7.151	5.645	10.731	4.358	2.352	5.854	5.809
SHBG	ENSOARG00000015191	ENSOART00000016531.1, XM_004012668, XM_012185674, XM_012185675, XM_012185676	sex hormone-binding globulin	11:26905230-26909276:1	10.192	10.283	7.003	3.964	6.6	9.906	9.549	7.174	4.348	9.36	7.228	8.919	4.392	2.694	2.759	10.28	9.391	6.564	4.883	7.835	8.685	10.735	9.093	5.894	9.386	7.656	8.217	6.307	3.36	7.457
SUMF2	101109064	XM_004020940, XM_012104417, XM_012104418	sulfatase modifying factor 2	24:27719813-27730992:1	3.903	5.6	5.254	3.966	9.509	7.413	4.888	5.726	5.734	8.063	7.372	6.275	6.213	4.945	4.116	8.519	7.128	5.579	7.299	7.27	7.79	6.356	6.973	7.51	7.195	9.446	8.193	6.545	6.498	10.735
ENSOARG00000014595	ENSOARG00000014595	ENSOART00000015887.1	no description available	4:76776885-76778281:-1	8.858	8.733	5.328	5.086	3.535	8.283	7.605	6.205	10.455	6.977	9.173	9.852	5.62	4.761	2.998	8.366	2.4	4.84	4.89	5.242	6.271	5.993	4.512	5.881	4.308	9.596	10.744	5.891	6.701	3.665
RPS27A	100135694	XM_004005944	ribosomal protein S27a	3:68703868-68706344:-1	4.48	5.104	6.042	6.417	7.311	2.414	5.865	2.829	4.346	5.692	3.661	3.175	5.08	5.4	2.725	5.476	6.434	4.422	5.391	7.229	5.625	4.437	5.131	8.526	8.043	7.297	10.746	6.315	9.624	8.669
ADAL	ENSOARG00000009801	ENSOART00000010667.1, XM_004017927, XM_012098894	adenosine deaminase-like	18:54041174-54071909:1	7.598	3.284	2.695	3.447	3.292	7.406	2.83	3.775	6.098	4.616	8.186	3.792	2.281	3.211	2.683	6.71	3.648	3.484	5.227	3.105	5.201	3.228	2.765	5.24	3.634	10.749	3.503	4.367	6.417	5.127
LOC105606043	105606043	XM_012108279	UBX domain-containing protein 11-like	AMGL01127363.1:11-1383:1	2.892	4.898	1.731	1.504	2.401	4.386	6.317	5.302	2.668	6.456	3.62	2.917	1.109	1.595	0.847	7.346	9.173	10.751	5.28	3.017	6.312	7.344	4.773	4.215	5.151	3.058	5.066	1.421	2.914	2.928
ANAPC2	ENSOARG00000002388	ENSOART00000002591.1	anaphase promoting complex subunit 2	3:1760353-1771880:-1	8.029	8.038	5.323	5.643	6.051	8.756	7.921	5.731	6.562	8.318	10.757	7.685	5.36	5.237	3.945	8.336	8.203	8.01	6.708	7.316	8.554	9.507	8.425	7.281	8.195	8.912	8.408	6.513	6.514	8.018
TMEM186	ENSOARG00000010665	ENSOART00000011599.1, XM_012104083	transmembrane protein 186	24:7650899-7654828:-1	9.647	5.311	3.829	6.138	7.451	9.472	5.864	6.318	10.758	7.285	10.176	2.773	2.568	6.492	4.799	9.853	5.771	5.427	8.911	7.644	10.167	6.358	8.043	9.192	7.264	9.408	5.523	5.916	10.691	8.088
TMEM161A	ENSOARG00000009460	ENSOART00000010301.1, XM_012179082	transmembrane protein 161A	5:3872196-3888944:1	5.539	5.429	2.704	2.855	5.211	5.513	6.062	3.767	3.611	10.76	7.043	5.25	3.499	2.476	4.135	4.799	3.967	3.93	4.097	7.476	5.559	6.178	5.197	4.742	6.018	5.581	6.093	3.738	3.227	5.973
ENSOARG00000004854	ENSOARG00000004854	ENSOART00000005291.1, ENSOART00000005292.1	cytidine monophosphate-N-acetylneuraminic acid hydroxylase	20:31500643-31683584:1	1.671	0.979	0.532	0.737	1.77	6.209	2.122	1.207	2.007	6.544	1.112	0.245	0.317	0.498	0.341	5.34	2.235	1.893	3.607	8.887	5.525	1.588	1.666	3.516	4.367	7.176	2.107	1.095	3.029	10.764
LOC101102895	101102895	XM_012176165	lethal(3)malignant brain tumor-like protein 2	3:216384147-216392615:1	8.455	4.92	4.823	6.224	6.053	6.918	5.01	5.19	8.125	8.875	9.465	5.062	3.351	6.216	3.693	7.001	5.888	6.457	8.932	7.637	7.82	6.409	7.537	9.462	7.202	10.764	5.958	5.928	8.343	7.834
ATG9A	ENSOARG00000019940	ENSOART00000021708.1, XM_004004944, XM_012146540, XM_012146543, XM_012146554, XM_012146564	autophagy related 9A	2:220146535-220155582:-1	5.232	5.636	3.865	2.517	7.646	5.315	6.016	4.813	2.629	10.766	5.77	5.018	2.404	2.906	5.333	4.923	8.667	7.487	3.889	8.123	5.333	7.625	6.433	3.939	8.954	5.89	8.386	5.367	2.828	7.931
KCNT1	ENSOARG00000004942	ENSOART00000005396.1, XM_012175881	potassium channel, sodium activated subfamily T, member 1	3:3448675-3488548:-1	5.624	3.65	3.061	4.001	10.771	3.024	2.397	1.157	1.096	6.662	6.504	4.679	1.972	1.402	8.581	2.598	2.383	1.619	1.219	7.89	2.499	1.944	1.531	2.407	5.785	1.643	1.311	0.915	1.158	6.675
ENSOARG00000000057	ENSOARG00000000057	ENSOART00000000061.1	no description available	AMGL01126330.1:1205-6780:-1	8.878	2.004	3.786	10.705	2.322	7.374	2.386	1.949	8.595	0.733	8.101	2.405	4.25	10.775	3.862	6.076	2.753	2.254	7.42	1.302	7.633	1.479	1.754	7.572	1.434	9.899	2.393	3.347	8.903	3.073
SPOUT1	ENSOARG00000009282	ENSOART00000010106.1	SPOUT domain containing methyltransferase 1	3:7513096-7522042:1	6.202	6.414	7.384	6.692	6.592	6.731	6.749	9.693	8.994	8.102	7.163	3.734	4.114	5.8	4.293	5.35	5.323	6.604	5.458	5.948	6.484	6.528	10.776	7.271	6.683	7.727	5.12	8.655	8.372	6.682
TMEM241	ENSOARG00000008070	ENSOART00000008784.1, XM_004020478, XM_012103486, XM_012103487, XM_012103488, XM_012103489, XM_012103490	transmembrane protein 241	23:33466726-33545499:1	8.622	5.939	3.36	3.5	6.004	7.495	5.634	4.783	6.083	8.94	8.602	5.059	3.051	3.439	4.153	7.907	6.719	5.432	6.993	7.393	10.777	9.29	8.286	8.914	8.259	9.656	7.592	5.567	5.333	6.512
BRE	101121412	XM_004005781, XM_012166941, XM_012166947, XM_012166956, XM_012166964	brain and reproductive organ-expressed (TNFRSF1A modulator)	3:34766481-35083758:1	9.351	0.006	2.848	2.502	2.396	10.625	1.107	3.746	4.454	2.759	8.56	6.948	0.153	4.254	1.163	7.742	0.018	3.334	7.8	6.483	9.79	6.825	2.602	4.391	0.002	10.782	1.718	0	3.083	4.822
SHPRH	ENSOARG00000002073	ENSOART00000002241.1, ENSOART00000002242.1	SNF2 histone linker PHD RING helicase	8:70105818-70179567:-1	10.779	2.281	1.633	5.347	4.207	10.17	2.589	2.95	8.401	5.451	10.782	2.689	1.331	5.932	2.753	8.848	2.929	2.695	8.252	3.961	10.579	3.368	3.347	8.864	4.796	10.776	2.542	2.229	7.322	5.128
ENSOARG00000013095	ENSOARG00000013095	ENSOART00000014231.1	no description available	4:103603282-103620960:-1	8.48	4.668	3.736	4.984	5.224	5.947	4.903	4.336	4.818	6.829	10.785	5.918	4.182	5.02	7.403	7.555	7.89	9.203	8.279	8.802	3.593	3.223	3.954	2.839	2.88	4.552	3.428	2.618	2.743	4.449
SPECC1	ENSOARG00000017557	ENSOART00000019112.1, XM_004013322	sperm antigen with calponin homology and coiled-coil domains 1	11:33077833-33223888:-1	7.82	5.936	2.099	2.474	6.122	5.74	8.035	6.227	6.251	5.892	7.796	7.143	3.716	4.398	6.319	9.319	6.814	3.331	5.438	4.822	8.448	10.785	8.305	8.323	5.337	7.611	9.605	7.823	6.343	4.652
B4GALT4	ENSOARG00000019700	ENSOART00000021453.1, ENSOART00000021454.1, XM_004002940	UDP-Gal:betaGlcNAc beta 1,4- galactosyltransferase, polypeptide 4	1:182332649-182360206:-1	7.049	5.161	2.655	2.188	2.795	7.31	5.535	4.216	4.53	5.984	10.786	5.225	2.317	3.698	4.574	8.272	4.267	3.604	5.381	7.408	6.684	3.856	2.635	3.58	3.874	7.724	3.083	2.856	2.803	4.517
NUDCD1	ENSOARG00000014426	ENSOART00000015705.1, XM_004011783, XM_012183961	NudC domain containing 1	9:67751901-67842922:1	9.782	5.228	5.598	6.842	7.419	9.252	5.681	5.86	9.675	10.789	8.924	6.161	4.441	4.679	4.797	7.44	6.782	4.315	7.743	7.883	9.635	7.007	7.634	9.607	8.831	9.744	6.983	7.108	9.484	10.351
SIRT5	ENSOARG00000013531	ENSOART00000014713.1	sirtuin 5	20:42004435-42021717:-1	9.419	6.923	3.783	4.261	8.33	8.591	6.173	4.119	5.192	9.639	10.124	6.497	2.732	5.233	7.954	7.996	7.984	4.821	6.18	10.794	7.368	7.705	3.979	5.321	9.457	7.17	5.553	3.203	3.907	8.093
ENSOARG00000000441	ENSOARG00000000441	ENSOART00000000469.1	no description available	X:67091542-67092195:1	8.578	3.993	5.345	3.423	6.651	10.68	8.096	5.291	3.154	8.19	7.787	5.461	2.17	3.328	7.772	10.795	7.445	6.074	7.819	6.721	6.787	4.333	4.177	5.456	5.763	8.056	6.13	5.224	4.804	7.852
VPS13A	ENSOARG00000012433	ENSOART00000013534.1	vacuolar protein sorting 13 homolog A	2:58887500-59119502:-1	8.961	2.023	1.984	5.049	2.154	10.797	2.499	2.563	7.855	4.596	9.069	2.726	1.609	3.81	1.498	8.73	2.55	1.64	5.238	2.377	8.396	2.459	2.483	6.811	2.46	9.753	2.439	2.378	6.871	4.141
GEMIN5	ENSOARG00000010195	ENSOART00000011107.1, XM_004009008, XM_012178843, XM_012178844, XM_012178845, XM_012178846	gem (nuclear organelle) associated protein 5	5:63601785-63637434:-1	6.369	2.405	3.918	5.819	2.379	4.97	2.661	6.999	10.801	4.466	7.291	2.093	2.788	4.02	1.151	4.637	2.176	2.508	5.206	3.171	6.204	3.034	5.675	6.632	3.801	8.38	2.653	5.038	8.568	4.698
SAP130	ENSOARG00000015968	ENSOART00000017389.1, ENSOART00000017391.1, XM_012130369, XM_012130376, XM_012130382, XM_012130390	Sin3A-associated protein, 130kDa	2:116330499-116395057:1	5.738	3.506	2.367	3.146	8.112	4.946	2.34	3.468	2.698	10.801	7.252	4.403	2.337	3.466	8.092	4.886	4.416	4.235	3.581	7.529	4.998	3.965	4.617	4.256	7.999	5.555	3.701	3.654	3.049	8.777
GOLGA1	ENSOARG00000013170	ENSOART00000014322.1, XM_012162984, XM_012162993, XM_012163002	golgin A1	3:10918440-10964062:1	10.802	4.931	3.329	6.108	5.258	9.786	4.281	5.888	8.876	7.777	10.235	5.553	2.738	7.128	4.248	9.004	5.726	5.103	8.87	6.279	8.678	4.918	5.15	8.734	6.353	9.775	4.697	3.983	6.728	7.134
ZC2HC1B	ENSOARG00000001734	ENSOART00000001865.1, ENSOART00000001866.1, XM_012183033, XM_012183034, XM_012183035, XM_012183036, XM_012183037	zinc finger, C2HC-type containing 1B	8:68258873-68273042:1	4.779	5.424	6.56	4.414	4.274	3.096	9.572	10.808	6.617	4.514	4.025	5.822	8.417	4.873	2.925	2.283	3.057	4.539	3.67	2.696	3.728	5.187	4.716	4.893	3.994	3.359	4.522	4.75	2.934	4.023
SLC8A1/101116716	101116716	XM_012173073, XM_012173077, XM_012173085, XM_012173093, XM_012173100, XM_012173106, XM_012173112, XM_012173115, XM_012173120, XM_012173125, XM_012173133, XM_012173136, XM_012173139, XM_012173145, XM_012173147, XM_012173153, XM_012173157, XM_012173165, XM_012173170, XM_012173175	solute carrier family 8 (sodium/calcium exchanger), member 1	3:83938866-84033297:1	1.013	2.566	0.673	0.637	0	8.303	7.261	2.146	1.832	1.974	3.341	4.606	2.746	1.506	0.138	10.817	4.593	1.986	2.032	0.886	3.845	2.641	2.162	0.981	0.548	3.149	1.228	0.734	0.702	1.15
MON1B	ENSOARG00000007309	ENSOART00000007951.1, XM_012094949	MON1 secretory trafficking family member B	14:3791599-3799666:1	9.006	8.035	8.588	8.368	7.7	6.513	6.83	10.818	8.528	8.427	8.049	5.91	7.274	8.127	5.599	7.719	7.549	10.141	8.001	6.628	6.144	7.392	8.542	7.117	7.203	6.304	6.522	7.014	6.439	6.815
PLSCR4	ENSOARG00000005630	ENSOART00000006132.1	phospholipid scramblase 4	1:240332163-240351917:1	4.434	1.605	1.662	2.086	2.476	1.138	0.276	0.262	0.347	1.065	9.912	4.498	2.595	4.056	10.821	0.286	0	0.351	0.388	1.253	1.463	0.598	0.908	1.212	2.822	1.865	0.619	0.31	0.948	1.365
LOC101104176	101104176	XM_012096029	cytochrome c oxidase assembly factor 4 homolog, mitochondrial	15:51526262-51529298:-1	6.824	5.433	5.039	8.04	8.013	6.063	4.488	6.71	9.615	5.52	7.82	4.958	4.492	8.053	4.213	4.917	3.188	5.839	6.111	4.904	5.576	5.618	7.901	10.822	8.265	9.146	4.997	6.797	9.51	5.091
KCNJ2	ENSOARG00000013847	ENSOART00000015068.1, XM_004013146	potassium channel, inwardly rectifying subfamily J, member 2	11:59474656-59485614:-1	0.791	0.624	1.932	1.846	0.319	0.729	0.358	1.183	1.534	0.602	1.17	4.384	10.829	7.304	0.467	1.305	1.414	1.678	1.094	0.699	0.277	0.276	0.885	0.917	0.313	0.175	0.7	0.763	0.306	0.114
FCN1	ENSOARG00000002004	ENSOART00000002157.1	ficolin 1	3:1352687-1360833:1	2.009	2.454	2.045	2.002	0.667	3.337	5.704	3.589	2.12	3.838	2.297	1.636	0.534	0.918	1.526	10.834	9.76	9.296	7.351	6.136	1.076	2.265	2.024	1.187	1.937	3.969	4.272	5.25	2.572	4.206
KIF3B	ENSOARG00000003470	ENSOART00000003772.1	kinesin family member 3B	13:61077629-61092454:1	7.193	2.762	4.182	7.094	5.586	6.242	4.18	6.712	9.423	7.008	7.395	2.238	3.342	9.333	4.917	5.271	3.793	6.066	10.834	4.888	8.538	4.705	6.233	8.121	6.125	8.555	3.591	4.49	8.174	5.918
MOCS3	ENSOARG00000014079	ENSOART00000015323.1, XM_004014636	molybdenum cofactor synthesis 3	13:78401202-78403972:1	6.221	10.23	6.393	6.666	5.168	4.741	10.159	10.834	8.006	5.442	5.76	5.699	5.682	3.796	3.509	6.181	6.17	5.794	5.703	4.912	5.532	9.308	9.943	5.855	4.522	5.901	7.673	6.391	7.408	5.345
CHST12	ENSOARG00000018018	ENSOART00000019609.1	carbohydrate sulfotransferase 12	24:40683955-40685205:-1	4.733	4.157	1.679	2.413	10.835	3.917	3.918	2.266	2.532	8.812	6.275	4.577	0.768	2.088	10.269	4.291	4.054	2.588	3.06	6.362	5.965	5.087	4.455	5.699	8.431	3.491	3.781	2.496	2.696	5.287
CTTN	ENSOARG00000000456	ENSOART00000000493.1, ENSOART00000000496.1, XM_012102213	cortactin	21:46818545-46839248:1	1.2	1.629	1.252	1.752	5.733	1.136	2.48	5.443	4.521	4.081	1.411	1.072	1.054	2.308	3.785	3.262	7.279	8.984	7.557	5.413	7.579	9.743	10.861	9.836	8.403	5.59	7.551	6.109	7.108	4.583
MKRN1	100499498	XM_012177242	makorin ring finger protein 1	4:103603217-103622769:-1	8.882	6.557	5.327	3.296	8.212	5.595	5.691	7.98	5.739	10.864	10.652	7.381	6.26	6.813	7.8	5.245	5.413	6.054	7.25	8.511	6.787	5.671	5.536	6.644	9.962	6.96	6.205	5.25	5.411	7.654
PPOX	ENSOARG00000009648	ENSOART00000010509.1	protoporphyrinogen oxidase [Source:VGNC Symbol;Acc:VGNC:33219] (assigned to orthologue: ENSBTAG00000021894)	1:110716493-110719899:1	7.856	6.597	6.208	7.993	8.986	7.924	6.74	7.326	10.622	8.857	9.569	4.763	4.087	7.142	6.06	6.666	5.231	5.229	8.987	7.934	10.865	8.005	8.103	10.214	10.595	9.26	6.737	7.095	8.856	9.017
TNS2	ENSOARG00000016737	ENSOART00000018234.1, XM_012176023	tensin 2	3:133237309-133255742:-1	5.212	6.904	5.096	3.614	10.874	4.581	6.51	4.223	2.511	7.07	5.904	6.217	2.924	2.086	6.483	4.797	5.689	4.308	3.535	9.229	3.779	4.595	6.279	4.19	7.631	4	4.715	4.819	3.44	9.689
DVL1	ENSOARG00000004051	ENSOART00000004407.1, XM_012187959	dishevelled segment polarity protein 1	12:49251682-49263814:1	9.446	5.639	3.31	5.001	9.871	8.671	5.058	3.371	5.979	10.883	9.725	5.122	1.593	3.705	6.978	8.336	5.125	4.38	6.641	8.712	8.984	6.79	6.266	9.26	8.954	8.887	6.756	3.434	6.024	7.996
ENSOARG00000002549	ENSOARG00000002549	ENSOART00000002760.1	no description available	JH921724.1:3848-6164:-1	2.297	7.449	4.194	2.768	6.222	3.097	10.526	7.093	2.128	6.918	2.536	10.162	5.949	2.153	10.053	2.482	10.884	9.181	4.224	6.679	3.252	6.826	5.658	1.669	5.932	2.402	9.075	10.322	2.356	8.4
PBX4	ENSOARG00000007632	ENSOART00000008311.1, XM_012179075	pre-B-cell leukemia homeobox 4	5:3467401-3533935:1	3.639	7.342	4.611	4.354	10.745	4.179	6.799	3.672	3.757	7.292	5.01	8.879	4.944	4.864	10.885	4.127	6.271	5.743	5.078	9.102	5.831	9.982	8.215	6.22	9.327	4.953	7.565	5.148	4.005	9.083
TCP11L1	ENSOARG00000017136	ENSOART00000018655.1, ENSOART00000018656.1, XM_012096185, XM_012096186, XM_012096187	t-complex 11, testis-specific-like 1	15:61887794-61912017:1	6.168	3.73	2.885	3.663	5.685	5.961	3.284	3.058	4.643	7.497	7.986	5.007	3.45	3.503	6.146	5.516	4.585	2.903	4.706	6.303	10.887	7.662	7.36	8.279	8.227	9.091	6.46	5.052	7.168	9.176
PPP3CC	ENSOARG00000010306	ENSOART00000011216.1, ENSOART00000011219.1, XM_004004194, XM_012119466, XM_012119469, XM_012119477, XM_012119485, XM_012119495, XM_012119503	protein phosphatase 3, catalytic subunit, gamma isozyme	2:42851206-42930139:-1	5.12	6.78	3.948	3.575	4.388	7.128	7.659	4.985	6.416	6.005	4.908	5.1	2.768	4.475	4.467	9.859	10.714	8.58	9.823	7.656	10.889	9.652	7.494	8.975	7.973	8.249	8.331	4.697	5.893	6.799
SHLD2	ENSOARG00000000827	ENSOART00000000885.1	shieldin complex subunit 2	25:41250449-41354115:1	9.866	3.045	2.782	6.333	5.318	10.33	0.522	2.572	10.105	6.855	10.895	3.455	1.844	8.867	4.902	9.982	3.623	1.819	9.872	5.645	5.033	0.547	2.692	6.01	4.629	9.98	2.964	3.54	8.826	8.075
LOC101121920	101121920	XM_012107852	leukocyte immunoglobulin-like receptor subfamily A member 6	JH921588.1:1309-5608:1	6.916	10.905	7.629	7.271	9.182	2.537	2.693	3.127	1.217	3.325	8.389	9.417	8.464	4.979	5.657	1.883	3.299	2.88	1.651	3.459	2.036	3.856	3.224	1.358	2.516	5.402	6.012	4.257	3.216	3.253
STMP1	ENSOARG00000009351	ENSOART00000010177.1	short transmembrane mitochondrial protein 1	4:99249556-99251056:1	4.72	2.017	2.09	5.352	6.589	8.649	10.905	2.243	5.573	0	4.671	4.536	2.261	5.85	1.721	4.46	4.121	5.405	7.808	4.028	3.521	6.545	0	4.941	2.681	5.635	3.601	2.181	3.364	3.388
TSC2	ENSOARG00000017283	ENSOART00000018821.1, XM_012103962	tuberous sclerosis 2	24:1574776-1604595:1	8.109	9.235	7.8	6.147	10.076	6.271	8.045	6.195	4.73	10.912	8.778	9.415	6.495	4.969	5.91	6.284	7.604	7.05	5.479	7.787	7.201	9.52	8.292	6.589	9.001	5.72	8.003	6.07	4.359	8.44
ENSOARG00000014567	ENSOARG00000014567	ENSOART00000015856.1	no description available	9:50347631-50347933:-1	7.579	2.895	6.83	10.013	9.67	3.303	2.641	5.609	10.915	3.5	7.1	2.292	2.781	9.119	9.085	2.311	1.971	1.556	3.396	2.311	4.001	2.621	4.228	6.912	3.268	4.154	3.114	4.015	6.097	4.884
KLF11	ENSOARG00000015319	ENSOART00000016669.1, XM_004005679, XM_012164475	Kruppel-like factor 11	3:19123200-19133438:1	6.913	3.677	2.356	2.384	6.111	1.944	2.357	1.625	3.131	6.156	10.919	4.811	1.271	2.773	8.267	2.103	1.871	1.429	5.185	6.871	3.814	3.206	2.618	3.997	4.88	6.764	4.064	2.819	2.746	6.075
PANK1	ENSOARG00000015307	ENSOART00000016657.1, XM_012102530, XM_012102531, XM_012102532	pantothenate kinase 1	22:10990260-11048591:-1	8.103	6.949	6.522	4.932	3.109	10.058	10.31	9.326	5.352	7.775	7.743	7.216	6.039	4.518	3.009	10.923	8.355	5.944	7.266	6.047	7.564	8.035	6.684	5.969	5.59	7.541	8.873	8.959	6.486	5.891
RICTOR	ENSOARG00000009682	ENSOART00000010557.1, XM_004017029, XM_012097017, XM_012097018	RPTOR independent companion of MTOR, complex 2	16:35304244-35420256:1	10.183	5.022	4.547	6.116	3.762	10.195	4.902	4.89	7.067	6.026	10.924	4.714	7.569	9.107	3.361	9.739	5.18	6.089	7.54	5.119	7.851	4.713	4.788	6.347	4.582	8.742	3.968	4.156	5.792	6.346
CCBL1	101117485	XM_004005591, XM_012161587, XM_012161594, XM_012161602, XM_012161603, XM_012161620, XM_012161628, XM_012161636, XM_012161641, XM_012161649	cysteine conjugate-beta lyase, cytoplasmic	3:7496211-7506550:1	3.524	5.679	5.058	3.076	10.935	3.192	5.625	6.042	1.941	6.875	3.296	4.183	3.007	1.021	5.575	3.141	3.596	5.096	2.01	6.693	2.739	4.55	6.099	2.012	7.774	3.986	5.531	6.68	2.542	6.593
RNF34	ENSOARG00000014491	ENSOART00000015775.1, XM_012097773	ring finger protein 34, E3 ubiquitin protein ligase	17:53355396-53376466:-1	9.725	2.384	2.434	3.734	4.462	10.431	2.757	4.983	7.902	8.805	10.937	3.502	2.632	7.537	4.499	9.113	4.189	3.415	8.014	7.452	7.722	2.334	3.704	8.532	7.704	8.898	1.878	2.909	6.316	6.798
ENSOARG00000009908	ENSOARG00000009908	ENSOART00000010782.1, ENSOART00000010785.1	cyclin B3	X:51894390-51938870:-1	9.729	3.15	3.977	8.124	4.463	6.531	2.353	3.745	7.382	5.451	10.939	4.221	3.274	9.199	0.909	3.657	2.087	1.907	3.974	3.419	8.22	5.279	6.219	9.376	5.692	9.347	3.219	5.63	10.535	7.234
WDR92	ENSOARG00000019929	ENSOART00000021697.1, XM_004005827	WD repeat domain 92	3:39942324-40058750:1	8.545	5.961	3.727	5.406	5.907	8.564	5.236	6.543	10.087	10.03	9.846	4.264	2.947	4.721	4.085	7.584	4.844	5.166	6.43	6.789	10.126	6.782	6.15	8.891	7.612	10.94	5.184	5.245	8.593	8.574
CDKAL1	ENSOARG00000009595	ENSOART00000010443.1, XM_012101218, XM_012101219, XM_012101221, XM_012101222, XM_012101223, XM_012101224, XM_012101225, XM_012101226, XM_012101227	CDK5 regulatory subunit associated protein 1-like 1	20:35755229-36363138:-1	10.031	4.685	3.142	7.504	4.549	9.118	4.54	3.439	10.944	5.918	10.595	5.165	3.614	7.574	3.954	8.745	3.464	3.534	8.385	6.261	9.022	4.978	4.132	9.406	5.89	10.228	4.692	3.898	9.994	6.391
LOC105610139	105610139	XM_012141554	60S ribosomal protein L19-like	2:199134922-199135606:1	4.526	4.95	3.431	3.035	1.969	3.303	3.691	4.899	10.946	4.051	4.36	5.691	3.554	4.084	1.705	4.501	1.934	2.163	3.438	3.285	5.063	2.531	3.283	4.714	3.238	5.689	5.203	6.927	7.051	2.093
LOC101118019	101118019	XM_004008777, XM_012178453, XM_012178454	PWWP domain-containing protein MUM1	5:41185760-41199463:1	5.674	4.974	3.305	1.944	8.955	7.262	3.38	3.93	3.667	10.95	7.455	4.229	1.947	3.496	7.308	6.42	4.569	3.646	5.914	8.35	6.908	5.675	5.837	5.543	8.49	6.832	5.048	3.761	2.213	9.042
KIAA1279	101107066	XM_004021421	KIAA1279 ortholog	25:25071796-25130279:1	10.074	0.65	4.328	2.753	3.035	5.358	4.231	1.922	8.313	6.756	9.379	1.965	2.9	10.954	4.03	3.101	5.697	2.394	7.511	5.456	8.003	5.096	6.634	7.667	7.245	9.965	3.975	2.239	7.023	4.38
INSR	ENSOARG00000000285	ENSOART00000000304.1, ENSOART00000000306.1, XM_004008549, XM_004008550, XM_012177947, XM_012177948	insulin receptor	5:13730631-13878994:-1	3.753	2.604	2.07	3.584	2.77	3.913	3.992	5.695	6.41	3.119	4.614	2.139	2.9	6.573	2.022	4.748	6.068	5.786	6.597	3.339	5.353	7.115	10.97	10.352	4.34	5.183	6.904	8.415	9.547	3.396
RRM2B	ENSOARG00000018014	ENSOART00000019607.1, XM_004011804, XM_012184037, XM_012184038, XM_012184039, XM_012184040, XM_012184041	ribonucleotide reductase M2 B (TP53 inducible)	9:74765568-74791830:1	10.474	5.766	5.877	6.076	7.499	8.903	5.923	5.666	6.219	8.296	9.57	5.026	3.334	4.383	3.793	8.708	6.249	5.596	9.415	8.392	10.571	6.883	6.138	9.059	8.313	10.972	6.673	5.65	7.089	8.715
KANK2	ENSOARG00000017799	ENSOART00000019366.1, XM_012177918, XM_012177920	KN motif and ankyrin repeat domains 2	5:13265483-13287876:-1	2.052	4.117	1.065	0.423	2.414	8.567	6.619	2.033	1.439	4.685	0.725	0.495	0.103	0.123	0.25	10.973	4.687	1.934	2.254	4.271	8.393	5.952	2.162	3.256	5.867	5.966	4.493	1.566	1.266	7.919
DHRS12	ENSOARG00000008965	ENSOART00000009771.1, XM_012184496	dehydrogenase/reductase (SDR family) member 12	10:21514502-21546827:-1	6.647	7.496	3.83	4.259	3.586	8.817	6.826	6.615	4.659	6.313	6.586	5.997	4.642	3.97	5.7	10.927	10.977	7.522	6.962	8.135	9.511	7.104	6.919	6.466	9.501	10.778	8.641	7.47	6.995	9.466
ENSOARG00000010868	ENSOARG00000010868	ENSOART00000011822.1	testis expressed 10	2:47260425-47305577:1	10.249	4.831	5.638	6.628	4.536	8.108	4.3	5.817	8.703	6.55	10.977	4.284	4.088	6.222	3.575	7.179	2.981	3.246	5.086	4.726	7.721	5.978	5.781	7.385	5.478	8.108	5.611	5.653	6.859	5.484
ENSOARG00000000348	ENSOARG00000000348	ENSOART00000000366.1	no description available	6:21961277-21961624:1	10.979	7.063	2.011	3.54	9.702	6.517	4.573	4.028	3.028	7.126	8.7	4.642	2.455	3.172	3.578	9.061	3.587	2.982	4.18	4.723	7.884	6.139	2.85	4.723	5.878	9.805	6.828	3.153	3.294	5.278
WDR73	ENSOARG00000013172	ENSOART00000014321.1, XM_004017765	WD repeat domain 73	18:21403640-21416499:-1	8.225	7.351	5.511	4.746	7.68	6.733	7.553	7.661	8.379	9.008	10.041	8.555	6.11	9.152	7.309	9.382	9.099	9.594	9.746	9.55	10.467	10.735	9.788	8.474	10.755	10.537	9.01	6.14	7.458	10.979
CDC14A	ENSOARG00000018190	ENSOART00000019795.1, XM_004003590	cell division cycle 14A	1:76847396-77018348:1	10.903	4.37	2.643	7.06	5.94	9.674	3.516	2.986	6.401	6.395	10.985	5.327	2.51	5.847	4.661	8.969	4.023	2.757	8.503	6.138	9.843	5.546	2.281	7.524	6.286	10.307	5.436	2.215	5.571	6.204
CDR2L	ENSOARG00000011445	ENSOART00000012443.1, XM_004013134	cerebellar degeneration-related protein 2-like	11:55429965-55441895:-1	4.85	3.802	2.28	2.176	7.001	3.843	4.984	3.221	2.492	10.985	7.854	5.335	2.462	2.607	8.948	1.27	1.812	2.281	1.894	3.27	7.189	7.991	4.407	5.728	7.656	1.625	1.659	0.942	0.87	1.86
SQRDL	101113498	XM_004010645, XM_012181644, XM_012181645	sulfide quinone reductase-like (yeast)	7:61798395-61834548:-1	6.75	0.889	2.699	1.065	2.229	10.987	5.225	4.583	4.114	5.389	6.902	4.176	2.264	1.092	0.267	4.925	8.998	4.171	7.709	5.09	6.597	4.161	6.965	8.875	7.674	5.629	7.759	6.365	5.43	4.028
RIOX1	ENSOARG00000000539	ENSOART00000000574.1	ribosomal oxygenase 1	7:81854059-81856123:1	9.182	4.769	2.928	8.388	4.281	6.047	6.556	10.99	7.037	6.485	6.405	1.845	3.152	5.192	5.221	5.802	1.62	6.557	7.072	4.706	3.458	6.041	9.788	8.304	4.307	7.348	3.497	3.318	8.759	2.594
CDT1	ENSOARG00000013512	ENSOART00000014695.1, XM_012094970	chromatin licensing and DNA replication factor 1	14:13527870-13540338:1	8.151	5.806	3.342	4.05	7.139	8.874	5.557	4.468	5.067	10.093	10.994	6.271	2.991	4.307	3.631	8.909	5.517	3.507	5.238	8.672	9.249	7.314	5.388	6.511	9.777	9.658	7.891	4.854	5.754	9.41
DUSP22	ENSOARG00000003869	ENSOART00000004201.1, XM_012101406, XM_012101407	dual specificity phosphatase 22	20:51025593-51067682:-1	3.764	5.273	3.471	3.418	3.991	6.261	7.216	6.212	6.515	5.913	3.84	4.66	3.136	4.063	3.75	4.952	11.007	10.082	7.417	4.983	4.945	6.804	5.378	6.106	5.314	6.377	6.491	5.245	4.868	6.571
ENSOARG00000020417	ENSOARG00000020417	ENSOART00000022232.1	lysozyme C, tracheal isozyme	3:150225121-150229639:1	3.185	1.344	4.488	2.699	4.663	6.14	5.887	5.662	7.133	7.305	5.762	4.609	6.801	7.264	1.093	6.855	6.828	4.751	6.77	11.011	5.13	3.7	5.477	6.021	9.944	2.664	3.872	4.901	4.934	5.247
ENSOARG00000015452	ENSOARG00000015452	ENSOART00000016808.1	no description available	2:109929429-109985401:1	8.361	4.024	3.655	6.593	3.276	7.968	3.708	3.331	6.513	3.556	7.803	3.602	3.279	5.698	2.34	8.473	4.625	3.941	7.48	4.514	10.026	5.079	4.594	8.225	4.978	11.02	5.547	5.246	8.949	5.918
CCDC77	ENSOARG00000012050	ENSOART00000013107.1	coiled-coil domain containing 77	3:211293835-211314698:1	9.296	2.897	2.351	5.04	5.063	8.065	3.139	3.647	5.059	7.409	11.021	4.358	2.466	6.172	3.782	6.946	3.174	3.064	5.058	6.148	8.8	4.425	4.491	6.363	6.694	9.786	4.33	5.235	5.916	6.979
LOC105605948	105605948	XM_012108141	calcium homeostasis endoplasmic reticulum protein-like	JH922927.1:1378-2215:-1	0.526	7.115	4.56	1.054	6.371	1.312	6.819	8.869	1.241	6.396	1.816	4.251	8.61	1.572	5.971	1.095	11.024	8.549	1.981	6.088	0.879	10.056	7.511	1.268	6.583	1.522	8.04	9.801	0.689	4.15
LOC105615520	105615520	XM_012180143	leukemia NUP98 fusion partner 1-like	1:98656116-98659471:-1	0.45	0.262	0.301	1.515	0.25	8.71	6.811	6.454	9.527	5.508	1.13	0.256	0.438	1.322	0	8.167	6.761	5.089	10.534	7.477	10.693	6.913	7.884	11.024	7.121	9.972	5.129	6.671	9.782	9.371
SLC9A8	ENSOARG00000013014	ENSOART00000014147.1, XM_012189330, XM_012189331, XM_012189332	solute carrier family 9, subfamily A (NHE8, cation proton antiporter 8), member 8	13:77457732-77517387:1	6.005	10.285	6.945	5.028	7.298	6.324	10.575	9.766	6.557	10.66	7.095	8.695	9.596	7.554	7.159	6.322	7.294	9.267	7.245	6.994	6.5	11.024	8.315	7.352	7.511	5.825	9.588	7.293	4.24	8.481
AFDN	ENSOARG00000004988	ENSOART00000005433.1	afadin, adherens junction formation factor	8:88919324-88997857:1	3.734	3.52	4.65	6.333	10.47	2.513	3.435	5.689	5.382	4.575	4.443	3.303	5.018	6.534	11.025	2.839	3.09	4.057	3.568	3.859	4.055	4.918	7.551	6.941	3.909	3.382	4.448	6.879	7.468	4.358
ENSOARG00000002464	ENSOARG00000002464	ENSOART00000002662.1	no description available	JH923218.1:6090-7745:1	8.298	7.565	5.802	8.056	6.318	11.032	7.514	9.067	7.815	6.791	6.935	4.576	4.222	4.648	6.201	6.886	6.538	4.515	5.415	6.156	7.265	6.691	7.713	7.559	9.592	5.845	4.693	3.516	6.486	4.904
ENSOARG00000004081	ENSOARG00000004081	ENSOART00000004437.1	no description available	19:52197630-52199804:-1	2.95	6.852	5.763	3.35	7.463	3.479	7.712	5.089	3.452	11.033	4.321	7.694	4.744	3.556	8.323	3.405	7.822	6.347	3.769	8.387	3.502	7.744	7.234	3.781	6.456	2.855	6.917	6.244	2.957	9.716
DARS2	ENSOARG00000012642	ENSOART00000013752.1, XM_004013809, XM_012187557, XM_012187558, XM_012187559, XM_012187560, XM_012187561, XM_012187562, XM_012187563	aspartyl-tRNA synthetase 2, mitochondrial	12:53234359-53261561:1	9.246	6.898	2.88	3.92	3.529	11.038	4.925	3.257	6.705	6.999	9.646	5.335	1.84	2.766	1.49	10.45	6.351	3.422	5.323	5.38	10.561	5.391	4.731	6.876	5.543	9.248	4.594	3.329	4.916	4.948
MAP3K4	ENSOARG00000004752	ENSOART00000005185.1, XM_012183213, XM_012183215, XM_012183216, XM_012183217	mitogen-activated protein kinase kinase kinase 4	8:83316234-83433552:1	9.521	5.499	4.366	4.851	6.534	7.782	4.465	5.834	6.461	9.797	11.038	5.908	3.208	4.489	4.894	5.629	4.332	3.828	4.779	6.416	7.964	5.809	6.207	6.602	6.84	8.774	5.817	4.816	5.745	8.18
ENSOARG00000006413	ENSOARG00000006413	ENSOART00000006966.1	no description available	26:5709867-5711644:1	9.099	5.433	2.488	8.143	1.454	6.095	3.37	0	6.484	1.282	4.598	2.849	2.707	4.383	1.508	8.629	1.486	1.887	11.04	9.655	6.185	3.082	0.978	9.326	3.423	5.623	1.493	0.918	4.817	3.746
FCER2	ENSOARG00000002445	ENSOART00000002652.1, XM_004008559, XM_012177962, XM_012177963, XM_012177964	Fc fragment of IgE, low affinity II, receptor for (CD23)	5:14204837-14215230:-1	2.609	11.04	4.179	1.204	0.245	0.492	0.568	0.379	0.123	0.398	6.172	5.676	5.993	1.408	0.325	2.018	2.625	3.202	2.214	0.841	1.988	3.145	1.871	1.064	1.674	0.928	1.016	1.193	0.517	1.034
FZD4	ENSOARG00000004175	ENSOART00000004543.1, XM_012101601, XM_012101602	frizzled class receptor 4	21:8036407-8045367:1	10.776	3.84	1.647	2.473	10.616	4.958	2.129	1.064	3.235	7.181	9.403	3.771	0.83	2.653	11.043	4.841	4.421	1.98	4.599	6.421	9.012	4.69	2.704	5.665	10.023	9.889	4.038	1.698	2.543	8.54
HIVEP2	ENSOARG00000001505	ENSOART00000001609.1	human immunodeficiency virus type I enhancer binding protein 2	8:67132812-67172996:-1	0.68	4.754	7.235	2.255	5.224	0.45	7.978	10.005	1.512	3.037	0.876	7.982	11.044	2.08	6.873	0.296	5.002	7.89	1.038	2.18	0.592	7.318	5.668	1.01	2.503	0.578	5.552	8.237	1.483	2.971
POLG2	ENSOARG00000014976	ENSOART00000016300.1, XM_004013031, XM_012186340	polymerase (DNA directed), gamma 2, accessory subunit	11:48071229-48094331:-1	10.984	3.626	2.453	5.369	6.009	9.638	3.797	4.376	7.395	8.419	11.045	3.836	2.174	6.867	3.515	7.9	4.688	4.205	7.463	6.415	10.757	4.485	4.773	9.532	7.308	10.987	3.997	3.549	8.294	8.805
PCIF1	ENSOARG00000007408	ENSOART00000008069.1, XM_012189484	PDX1 C-terminal inhibiting factor 1	13:74224487-74235868:1	6.818	9.038	7.279	6.008	9.788	6.181	9.355	8.093	4.897	11.05	9.433	10.789	8.169	5.846	8.961	6.761	8.583	9.109	5.476	10.198	6.423	8.934	7.971	6.189	8.837	6.822	9.425	7.13	4.565	10.51
ABRAXAS1	ENSOARG00000002878	ENSOART00000003119.1	abraxas 1, BRCA1 A complex subunit	6:97847104-97862167:-1	7.466	4.932	7.395	7.111	5.189	6.188	4.959	8.827	11.056	5.46	5.457	4.623	6.914	5.958	4.424	7.571	5.013	6.913	6.473	7.003	4.575	4.18	7.199	6.024	3.663	7.027	4.173	7.413	8.983	5.499
CDR2	ENSOARG00000015755	ENSOART00000017153.1, XM_012104256	cerebellar degeneration-related protein 2, 62kDa	24:20034186-20062050:-1	3.927	3.853	2.709	2.863	3.187	5.362	2.456	3.448	4.442	5.286	6.822	3.12	1.53	3.522	1.853	11.059	4.637	2.778	5.635	7.297	6.838	3.907	3.997	5.155	5.002	9.27	4.834	4.711	6.572	6.716
KLHL11	ENSOARG00000017784	ENSOART00000019348.1	kelch like family member 11	11:41528667-41535388:-1	9.85	4.314	4.785	7.903	3.845	9.422	5.603	6.841	11.061	6.391	10.901	3.745	3.978	8.272	3.949	7.469	5.331	4.56	9.811	4.624	8.414	5.162	5.474	9.592	4.37	9.695	4.422	5.036	10.046	5.127
SETDB2	ENSOARG00000008487	ENSOART00000009236.1, XM_012184460	SET domain, bifurcated 2	10:19328603-19370596:1	9.052	2.642	2.532	5.482	3.506	10.715	3.906	6.022	11.067	6.472	8.438	2.038	2.03	5.573	2.273	7.342	3.175	3.369	6.979	3.797	6.336	2.748	3.514	7.562	3.884	7.934	2.654	3.402	7.621	4.732
CPEB2	101116316	XM_012180360, XM_012180361, XM_012180362, XM_012180363, XM_012180364, XM_012180366	cytoplasmic polyadenylation element binding protein 2	6:109723532-109797301:1	2.59	7.692	4.902	4.317	4.691	3.231	9.263	7.239	3.663	5.843	2.9	9.464	6.729	5.24	8.905	3.436	11.077	7.268	5.367	4.907	3.073	10.613	8.844	5.174	4.055	3.21	9.177	8.785	3.525	5.407
LSS	ENSOARG00000013023	ENSOART00000014156.1, XM_012104655	lanosterol synthase (2,3-oxidosqualene-lanosterol cyclase)	1:264027636-264059211:-1	3.681	8.082	9.521	4.001	3.071	4.568	7.074	6.545	2.89	7.791	3.269	6.709	6.315	2.791	0.597	6.814	11.079	3.377	2.313	2.663	2.027	4.034	4.417	1.929	2.218	5.078	8.939	9.199	4.449	7.477
LOC101105614	101105614	XM_004002282, XM_004002283, XM_012177916, XM_012177919, XM_012177925, XM_012177945, XM_012177949, XM_012177956	cytochrome b561 domain-containing protein 1	1:85914516-85923417:1	6.242	5.478	4.134	3.11	5.58	7.069	7.52	4.886	5.916	6.005	5.874	4.679	2.618	3.441	3.74	6.395	4.791	4.152	6.51	6.326	11.082	7.212	6.547	7.438	10.149	9.136	4.826	5.101	5.155	8.916
PDCD7	101110945	XM_012180733	programmed cell death 7	7:11837311-11848653:-1	11.085	5.415	5.122	5.832	5.861	9.023	5.29	7.591	6.481	8.214	9.847	2.781	3.565	4.444	2.893	5.98	2.793	4.387	5.076	6.858	7.949	5.037	3.984	6.672	7.207	8.063	4.377	4.503	4.745	5.831
TMPRSS4	ENSOARG00000007904	ENSOART00000008606.1, ENSOART00000008613.1, XM_004016062, XM_012095516, XM_012095517, XM_012095518	transmembrane protease, serine 4	15:28274723-28296435:1	8.575	2.461	2.302	8.648	1.933	8.896	3.371	2.73	9.112	2.661	9.112	2.98	2.906	8.414	2.483	7.455	3.12	2.977	8.925	2.171	8.779	2.525	2.935	8.507	2.588	11.088	3.09	3.018	8.707	3.287
PRORP	ENSOARG00000007351	ENSOART00000007997.1	protein only RNase P catalytic subunit [Source:VGNC Symbol;Acc:VGNC:55893] (assigned to orthologue: ENSBTAG00000009682)	18:44292540-44425667:1	8.93	3.408	1.862	7.521	3.463	7.647	4.316	6.167	10.449	6.084	10.311	4.04	1.649	7.35	3.301	5.236	3.677	3.095	5.658	4.471	9.069	5.63	4.131	11.091	5.855	8.48	2.715	2.66	7.423	5.044
FAM71F1	ENSOARG00000003014	ENSOART00000003264.1, XM_004008042, XM_012177099	family with sequence similarity 71, member F1	4:92747440-92762600:1	11.092	9.626	7.809	9.005	5.581	3.419	2.439	2.405	2.442	2.421	7.519	4.077	4.213	5.415	4.049	5.856	3.525	3.166	3.825	3.631	7.204	4.679	4.662	5.896	4.629	5.098	2.763	2.469	2.965	3.071
ENSOARG00000019177	ENSOARG00000019177	ENSOART00000020883.1	no description available	7:20568126-20587098:1	7.566	5.789	4.358	4.596	8.089	7.048	6.126	4.715	6.562	11.093	6.6	7.251	3.895	5.596	7.028	6.584	7.744	5.869	5.799	8.216	7.304	7.225	6.174	5.8	8.444	6.558	8.466	4.491	5.357	7.371
TLCD3A	ENSOARG00000011520	ENSOART00000012524.1	TLC domain containing 3A	11:21716426-21723922:-1	3.958	6.662	4.021	2.103	2.864	8.454	11.099	7.065	5.368	8.211	4.054	5.29	2.163	1.286	1.497	5.145	4.607	3.594	2.628	3.254	6	5.431	4.993	3.385	3.488	4.743	6.313	5.369	3.56	4.936
ENSOARG00000000311	ENSOARG00000000311	ENSOART00000000330.1	no description available	JH921894.1:28009-28273:1	2.79	9.654	4.509	3.432	2.498	5.936	4.862	3.866	3.103	0	5.049	11.108	1.032	3.647	4.087	3.658	2.234	1.193	4.518	3.811	3.819	5.197	6.828	5.396	8.388	3.174	5.283	2.158	1.668	5.874
LOC101103208	101103208	XM_012104383	sesquipedalian-1-like	24:26561693-26562487:1	8.994	2.711	1.662	4.829	6.45	11.112	3.744	3.443	6.039	7.504	8.658	3.696	2.053	5.515	4.533	7.777	3.091	3.45	4.233	4.553	8.344	3.668	1.91	5.068	5.476	7.423	2.118	2.369	4.622	4.534
CHEK2	ENSOARG00000002461	ENSOART00000002668.1, XM_012098008	checkpoint kinase 2	17:67671289-67708365:-1	9.326	4.038	2.374	3.264	3.491	11.119	4.136	2.293	3.585	6.863	10.983	5.629	3.208	3.347	1.37	10.299	4.691	2.127	3.133	5.976	9.635	4.591	4.176	5.032	6.86	10.707	5.404	3.326	5.131	7.582
ENSOARG00000011986	ENSOARG00000011986	ENSOART00000013039.1	ribosomal protein L10a	20:9537073-9539148:1	1.028	3.189	2.882	6.111	0.462	3.098	2.619	2.931	11.119	1.058	1.781	3.707	1.333	2.341	0	3.235	1.094	0.605	4.287	0	1.543	1.644	1.778	4.789	0	5.275	1.596	1.793	6.95	1.424
MAML2	101102586	XM_004016533	mastermind-like 2 (Drosophila)	15:13369523-13776915:1	4.784	5.661	8.665	7.569	6.131	3.029	5.667	11.119	4.432	6.351	3.718	5.222	7.552	4.791	6.337	3.742	3.654	3.664	3.332	5.208	3.293	4.862	6.57	2.922	4.056	3.533	4.148	5.252	3.618	3.883
UBE3B	ENSOARG00000015640	ENSOART00000017025.1, ENSOART00000017030.1, XM_004017436, XM_012097936, XM_012097937, XM_012097938, XM_012097939, XM_012097940	ubiquitin protein ligase E3B	17:63297633-63343986:-1	6.333	7.661	5.986	4.56	7.172	6.422	7.613	7.015	5.017	11.121	6.995	7.25	5.778	4.185	5.516	6.16	7.631	7.661	5.529	7.243	6.596	7.492	7.123	5.373	8.076	6.145	7.112	5.582	4.216	8.039
FADS2	ENSOARG00000013845	ENSOART00000015072.1, XM_012102004, XM_012102005	fatty acid desaturase 2	21:39763730-39790895:1	0.435	1.104	3.665	2.019	0.848	0.972	1.768	1.207	1.034	0.475	0.921	1.427	1.858	1.704	0.846	11.124	2.746	2.06	2.027	0.103	0.269	0.517	0.61	0.39	0.26	0.569	0.749	0.449	0.747	0.567
TMEM57	101118595	XM_012151781, XM_012151791, XM_012151799, XM_012151805	transmembrane protein 57	2:240427681-240492411:-1	9.809	5.886	4.307	6.901	8.143	11.129	6.493	4.613	9.115	9.584	10.865	6.525	2.529	8.684	7.276	11.074	7.751	3.749	9.386	8.026	8.785	5.577	5.296	9.028	5.951	10.607	6.63	4.57	7.648	5.22
THRB	ENSOARG00000004444	ENSOART00000004838.1, NM_001190391	thyroid hormone receptor, beta	26:40310591-40391676:1	11.131	5.479	3.814	3.232	4.563	2.275	1.221	0.843	0.958	1.468	7.23	4.797	2.544	1.35	1.493	5.136	5.652	3.819	2.31	4.233	7.822	6.177	4.217	3.659	5.756	5.159	4.241	3.527	3.01	3.869
CHAC1	ENSOARG00000020312	ENSOART00000022117.1	ChaC glutathione specific gamma-glutamylcyclotransferase 1	7:33499185-33500057:1	0	0.126	0.796	0.204	0.815	3.544	1.202	2.367	0.315	0	0.119	0.627	0	0.156	1.634	11.132	1.219	0.301	0.696	9.126	0.067	0	0.479	0.097	0.57	0.122	0.252	0.44	0.336	0.235
SIRPA	101105677	XM_004014393, XM_012188790, XM_012188791	signal-regulatory protein alpha	13:52520701-52565530:-1	7.356	6.455	5.407	8.804	3.767	10.594	8.54	8.173	7.804	9.919	7.592	7.343	6.913	8.899	6.312	9.771	9.667	5.524	11.074	9.974	10.661	8.833	10.726	11.132	10.874	8.156	6.846	5.008	5.892	6.978
EPHX1	ENSOARG00000017468	ENSOART00000019014.1, XM_012187144	epoxide hydrolase 1, microsomal (xenobiotic)	12:27015375-27036605:1	3.59	3.112	2.969	2.17	7.973	2.93	2.354	1.849	1.714	6.06	2.947	2.641	1.41	1.237	1.954	3.279	3.677	3.555	3.013	8.044	5.778	5.926	4.874	5.249	11.14	4.696	4.939	3.989	2.884	8.674
LOC101122123	101122123	XM_004013838, XM_012187655, XM_012187656, XM_012187657	torsin-1A-interacting protein 2	12:59113587-59146532:-1	7.025	3.203	1.874	3.177	6.041	5.477	1.733	0.88	1.59	6.239	11.148	4.036	2.852	4.788	3.428	6.237	1.032	1.592	3.428	4.437	9.83	2.963	5.039	6.833	4.738	10.684	4.28	2.204	3.75	5.797
BAHD1	ENSOARG00000020226	ENSOART00000022020.1, XM_012181201	bromo adjacent homology domain containing 1	7:33081720-33090460:1	3.517	5.073	4.259	3.006	7.561	3.644	6.196	5.252	2.627	11.154	4.638	4.032	2.939	2.976	9.428	3.643	4.232	4.214	3.211	6.326	4.846	5.33	8.012	4.239	7.684	3.923	6.121	5.238	2.716	8.088
JMY	ENSOARG00000017278	ENSOART00000018810.1, XM_012182261	junction mediating and regulatory protein, p53 cofactor	7:10057051-10133148:1	3.226	1.857	1.901	2.833	1.657	1.975	3.562	2.769	4.743	3.499	2.555	3.41	3.08	4.37	3.518	1.34	11.155	4.233	2.173	1.827	1.286	1.575	1.049	2.221	1.829	1.17	1.182	0.888	1.168	1.291
TMCO4	ENSOARG00000009689	ENSOART00000010551.1, XM_004005166, XM_012153564, XM_012153574, XM_012153584, XM_012153591	transmembrane and coiled-coil domains 4	2:245749948-245832283:1	10.289	8.214	4.865	3.861	7.65	10.572	8.441	5.762	5.14	10.408	11.155	8.874	3.749	2.845	4.96	9.007	7.534	6.234	5.573	8.574	7.559	6.889	6.425	5.326	8.349	7.757	7.163	4.541	3.674	8.234
ERO1B	ENSOARG00000003617	ENSOART00000003927.1	endoplasmic reticulum oxidoreductase 1 beta	25:8948564-8997577:-1	8.242	3.669	4.204	6.035	6.825	6.198	5.936	5.403	6.11	5.478	9.101	6.483	7.258	11.158	9.052	4.478	5.113	4.861	7.888	3.988	5.141	3.85	3.878	6.253	3.77	6.173	3.917	4.23	5.102	5.325
PHF14	ENSOARG00000006587	ENSOART00000007162.1, ENSOART00000007163.1, XM_012176405, XM_012176406, XM_012176407, XM_012176409, XM_012176410, XM_012176411, XM_012176412, XM_012176413, XM_012176414	PHD finger protein 14	4:19050354-19165412:1	11.159	2.648	1.591	4.312	3.574	9.257	2.911	3.508	6.983	5.446	9.823	3.52	2.948	5.529	2.569	8.422	3.24	3.731	7.452	4.404	9.728	3.683	3.063	8.146	5.185	8.969	2.677	2.18	5.074	4.653
C1H1orf54	101103855	XM_004002445	chromosome 1 open reading frame, human C1orf54	1:99264812-99271975:1	6.657	4.701	2.04	2.306	5.413	7.834	1.831	3.968	3.602	7.481	5.232	2.687	1.477	1.436	1.807	8.639	8.042	2.916	6.039	2.019	11.169	4.093	4.501	8.032	7.746	5.286	3.616	2.463	4.317	4.584
ENSOARG00000009881	ENSOARG00000009881	ENSOART00000010753.1	no description available	18:6432503-6544219:-1	9.262	7.314	6.249	7.089	7.43	9.669	7.704	5.838	5.767	7.391	8.977	6.271	6.497	3.979	4.253	11.17	9.704	7.289	8.86	7.54	9.322	6.107	6.891	6.7	8.542	6.567	5.351	4.174	5.032	6.491
RSBN1L	ENSOARG00000018094	ENSOART00000019696.1, XM_012177421	round spermatid basic protein 1-like	4:43503859-43570568:-1	10.896	2.09	2.77	5.928	4.359	11.172	2.42	4.67	8.791	6.621	10.834	1.837	2.215	8.167	4.092	10.154	2.684	2.944	8.289	5.387	9.895	2.903	4.276	8.452	5.675	10.484	1.953	3.871	7.452	6.188
LRRC20	ENSOARG00000006043	ENSOART00000006568.1, ENSOART00000006570.1, XM_004021432, XM_012105220, XM_012105221, XM_012105222, XM_012105223	leucine rich repeat containing 20	25:26314866-26354989:-1	6.748	4.46	2.166	1.168	4.318	7.247	4.434	2.183	2.229	9.811	7.278	4.038	2.539	0.888	1.375	7.676	3.302	3.311	2.424	7.45	7.053	4.757	2.638	4.034	6.699	11.173	8.827	2.902	2.688	6.96
LOC101113219	101113219	XM_012168267	40S ribosomal protein S23-like	3:43017585-43018119:-1	0	0.667	0.87	0	1.17	0.001	0.682	11.118	5.403	6.008	2.04	7.474	11.176	1.046	0	1.935	0	0.718	1.639	3.133	2.761	5.675	0	0.001	2.255	1.939	2.587	0	0	0
TYSND1	ENSOARG00000005850	ENSOART00000006367.1, XM_004021429	trypsin domain containing 1	25:26175302-26185745:-1	7.298	3.729	2.103	3.553	6.026	7.059	2.959	4.273	5.162	11.177	7.396	2.023	0.896	2.326	3.059	8.42	4.526	2.803	5.058	7.357	8.622	4.569	7.358	7.075	8.751	6.964	3.113	2.215	4.958	7.95
TBC1D19	ENSOARG00000008584	ENSOART00000009347.1, ENSOART00000009348.1, XM_004009756, XM_012179776, XM_012179777	TBC1 domain family, member 19	6:45893249-46017360:1	10.041	5.721	6.804	6.691	5.698	5.529	3.581	4.116	5.801	6.802	7.211	3.744	3.236	4.588	3.595	6.363	6.846	7.088	9.389	6.594	9.596	6.265	6.105	7.333	6.572	10.414	8.858	9.165	11.181	6.845
NECAB3	ENSOARG00000008288	ENSOART00000009026.1, ENSOART00000009027.1, XM_012189077, XM_012189078	N-terminal EF-hand calcium binding protein 3	13:62539560-62561169:-1	8.15	7.042	3.137	1.973	7.666	9.229	5.447	2.494	2.002	10.328	11.182	5.829	3.15	1.802	4.216	6.383	2.853	1.81	1.555	8.643	6.856	4.051	3.286	2.556	5.266	8.656	5.468	3.202	2.707	8.985
MAPK13	ENSOARG00000013006	ENSOART00000014141.1, NM_001139455	mitogen-activated protein kinase 13	20:10175179-10182519:1	6.526	9.017	3.684	3.228	8.262	8.047	10.019	3.677	2.583	8.333	6.737	4.527	2.243	1.436	9.565	11.185	7.142	5.339	4.968	8.55	5.669	6.175	6.044	3.326	5.268	5.196	6.337	3.044	3.02	6.524
SEC22C	ENSOARG00000003447	ENSOART00000003744.1	SEC22 homolog C, vesicle trafficking protein	19:14632210-14644195:-1	9.593	4.802	2.638	3.264	6.041	10.453	3.501	2.015	4.255	5.735	8.19	3.317	0.564	5.287	4.353	11.188	6.593	4.358	6.592	6.153	9.514	5.838	4.421	7.086	7.761	9.535	4.864	3.463	4.633	7.452
LOC101121770	101121770	XM_012177611	small integral membrane protein 15-like	5:1170745-1173361:1	9.175	7.654	8.272	8.644	6.706	8.628	8.833	8.305	9.369	5.862	11.19	9.278	8.122	8.755	4.79	8.34	7.483	6.197	7.744	9.351	9.225	6.911	9.234	9.011	5.582	10.144	6.872	8.497	9.442	7.437
CHAF1B	ENSOARG00000013992	ENSOART00000015243.1, XM_012104951	chromatin assembly factor 1, subunit B (p60)	1:266698184-266725437:1	8.322	5.136	6.147	9.172	10.223	3.833	2.212	2.37	1.437	6.859	11.201	5.226	4.552	4.167	9.999	6.154	7.743	6.063	3.555	9.181	5.385	4.124	3.879	3.245	7.763	7.812	4.99	3.997	3.676	7.946
TIGAR	ENSOARG00000010271	ENSOART00000011173.1	TP53 induced glycolysis regulatory phosphatase	3:209705243-209715721:-1	7.345	8.165	8.348	5.454	6.993	4.563	8.54	7.757	6.358	11.203	6.916	8.189	8.574	7.022	8.667	5.864	10.047	9.355	5.726	6.77	7.057	9.755	10.545	7.379	9.959	7.827	7.759	10.713	7.575	8.885
TMEM216	ENSOARG00000012873	ENSOART00000013994.1, ENSOART00000013995.1, XM_004019585, XM_012101986, XM_012101987, XM_012101988	transmembrane protein 216	21:39295749-39302446:1	8.024	9.037	4.057	2.868	5.127	11.204	8.531	6.682	4.903	9.27	9.232	7.465	3.584	6.332	3.082	8.972	7.083	7.921	6.827	9.693	8.972	6.094	3.894	5.567	8.756	10.272	8.33	5.264	5.66	9.642
MOGS	ENSOARG00000012692	ENSOART00000013797.1, XM_004006098	mannosyl-oligosaccharide glucosidase	3:96258350-96261793:-1	6.881	3.445	3.737	6.503	6.289	8.084	4.175	7.298	8.79	8.109	9.144	3.305	2.957	6.426	4.643	8.091	5.882	5.817	6.991	5.247	8.208	4.64	7.754	11.206	7.883	7.77	3.716	4.927	9.958	6.99
TRIM32	ENSOARG00000005852	ENSOART00000006368.1, XM_012154213	tripartite motif containing 32	2:7009809-7017830:-1	4.972	0.932	0.625	1.052	3.476	10.674	1.658	2.38	3.244	11.212	10.688	0.793	0.549	1.37	2.91	7.269	1.376	1.61	2.863	6.4	8.871	1.795	2.409	3.915	9.233	7.773	1.299	2.044	2.762	7.4
ENSOARG00000018833	ENSOARG00000018833	ENSOART00000020508.1	no description available	1:84984611-85048023:-1	9.509	1.527	1.211	11.215	1.253	2.621	2.702	1.284	2.534	1.193	2.643	0.75	1.123	2.221	1.629	2.674	0.888	1.498	2.279	0.549	2.298	0.838	1.169	2.112	1.141	2.631	0.553	0.664	4.37	1.466
LOC105605097	105605097	XM_012105633	GATA zinc finger domain-containing protein 14-like	25:41702067-41712696:-1	8.762	2.578	2.355	3.509	2.303	7.419	2.706	1.881	3.646	3.434	9.335	2.85	2.492	4.004	2.584	11.218	4.601	3.349	7.312	4.482	7.046	2.953	2.096	4.287	3.292	9.031	3.605	3.361	4.198	6.592
BBX	ENSOARG00000018829	ENSOART00000020507.1, XM_012189591, XM_012189593, XM_012189595, XM_012189597, XM_012189602, XM_012189609, XM_012189614, XM_012189619, XM_012189625, XM_012189630, XM_012189637, XM_012189640	bobby sox homolog (Drosophila)	1:170757495-170918162:1	7.982	3.032	1.306	2.792	4.125	9.887	3.442	1.696	3.601	5.629	11.222	5.031	1.861	3.899	4.018	8.546	4.175	2.227	5.861	5.322	10.606	5.047	2.156	5.672	6.423	10.402	4.517	2.041	3.46	7.227
EIF4G3	ENSOARG00000008710	ENSOART00000009489.1, ENSOART00000009492.1, XM_012152904, XM_012152907, XM_012152915, XM_012152922, XM_012152929, XM_012152937, XM_012152940, XM_012152949, XM_012152958, XM_012152966, XM_012152975, XM_012152982, XM_012152987, XM_012152993, XM_012152999, XM_012153009, XM_012153019, XM_012153031, XM_012153040, XM_012153045, XM_012153055, XM_012153058, XM_012153067, XM_012153077, XM_012153084, XM_01…	eukaryotic translation initiation factor 4 gamma, 3	2:244554024-244729473:1	9.075	5.363	4.245	4.69	8.934	7.511	6.632	4.703	5.838	9.835	8.819	6.36	4.369	4.539	6.609	7.559	6.192	4.215	5.887	8.265	9.414	7.728	6.439	7.736	9.722	10.59	10.333	6.793	6.69	11.225
KIF21B	ENSOARG00000017121	ENSOART00000018634.1, XM_012187998	kinesin family member 21B	12:77658252-77686768:-1	4.868	3.319	1.695	4.81	11.23	3.906	1.92	1.433	1.855	7.4	7.093	3.982	1.25	3.102	10.992	3.941	2.499	1.522	2.976	6.861	4.029	2.147	1.782	4.301	6.342	4.395	2.384	1.336	3.284	8.12
NEMP1	ENSOARG00000007728	ENSOART00000008412.1	nuclear envelope integral membrane protein 1	3:162248254-162264573:1	7.791	7.994	5.394	4.039	5.881	5.749	6.676	3.799	2.73	9.546	7.349	6.54	3.063	2.214	2.941	4.84	4.243	2.537	2.685	7.931	7.768	9.765	5.761	3.994	8.89	7.852	7.137	7.019	4.733	11.233
RFLNB	ENSOARG00000011867	ENSOART00000012903.1	refilin B	11:21886090-21891132:1	0.335	2.414	0.958	0.677	0.585	0.908	11.234	8.931	5.604	0.617	0.31	2.274	1.576	1.854	0.171	0	3.526	2.06	1.882	0.191	0.319	3.224	2.141	1.651	0.237	0.855	2.169	1.676	1.144	0.266
LOC105605953	105605953	XM_012108147	multidrug resistance-associated protein 4-like	JH922952.1:370-3027:1	5.435	2.369	2.689	2.822	2.75	11.235	5.886	2.142	4.718	2.962	0.737	0.154	0.452	0.253	0.348	2.011	2.122	1.653	1.383	0.527	1.365	1.436	0.158	1.252	1.595	1.119	0.865	0.283	0.486	0.81
FAM214A	ENSOARG00000020933	ENSOART00000022804.1, ENSOART00000022805.1, XM_004010600, XM_012181531, XM_012181532, XM_012181533, XM_012181534, XM_012181535, XM_012181536, XM_012181537	family with sequence similarity 214, member A	7:54733579-54800027:1	8.791	4.098	1.812	2.274	6.089	8.053	5.476	2.507	2.927	10.944	9.684	7.228	2.018	2.993	8.688	11.242	9.826	3.424	6.154	10.496	9.283	6.326	3.364	6.182	9.349	8.061	4.869	2.943	3.176	9.412
BRWD3	ENSOARG00000000712	ENSOART00000000801.1, XM_012106984, XM_012106985, XM_012106986, XM_012106987	bromodomain and WD repeat domain containing 3	X:68010507-68045098:-1	7.676	3.676	2.816	6.923	3.029	10.304	3.521	2.681	8.389	4.973	7.962	3.848	2.311	8.34	2.857	11.254	4.109	4.335	10.319	2.806	9.573	5.441	2.904	8.376	4.813	8.521	2.11	1.755	8.594	4.076
MED24	ENSOARG00000012736	ENSOART00000013850.1, XM_004012855	mediator complex subunit 24	11:39910773-39935531:-1	9.249	7.418	6.518	6.753	8.719	8.446	6.37	7.999	7.902	11.254	10.928	7.008	6.768	8.833	7.185	7.121	7.182	7.641	7.207	8.169	7.771	7.876	7.797	7.278	8.387	8.129	6.821	6.202	6.758	8.978
ZNF175	ENSOARG00000014764	ENSOART00000016066.1, XM_012094691	zinc finger protein 175	14:56482742-56489234:1	11.259	4.212	4.332	5.859	4.995	5.84	3.329	3.396	5.333	3.263	9.718	3.654	4.515	5.433	3.872	7.426	4.712	5.084	7.232	5.137	9.371	5.542	5.6	8.26	6.284	8.767	4.424	5.083	7.439	6.338
C14H19orf40	101110081	XM_012190123	chromosome 14 open reading frame, human C19orf40	14:42691979-42695643:1	8.133	4.495	4.425	7.422	4.675	8.696	0.673	11.259	4.469	7.618	4.381	7.722	3.655	5.61	4.136	5.125	0	3.542	9.893	7.766	11.232	8.389	4.787	8.299	6.117	4.647	11.261	4.735	6.149	3.589
CPNE2	ENSOARG00000018900	ENSOART00000020583.1, XM_004015017	copine II	14:24559628-24594593:1	5.562	6.111	4.921	4.354	7.89	5.082	6.203	3.659	3.66	8.283	7.509	6.607	3.816	2.679	6.441	3.878	2.558	2.621	2.982	5.665	6.753	6.436	5.616	5.732	8.473	7.723	8.83	7.116	4.61	11.261
RAN/ENSOARG00000010707	ENSOARG00000010707	ENSOART00000011647.1	RAN, member RAS oncogene family	24:15349789-15350439:1	3.043	6.416	5.505	3.412	5.646	2.733	3.904	10.018	4.411	5.501	4.997	5.116	4.778	3.297	2.303	5.494	4.577	7.158	5.877	4.634	5.707	9.275	10.593	5.716	11.269	7.834	8.323	8.47	4.757	6.37
TBC1D30	ENSOARG00000003221	ENSOART00000003500.1, XM_004006494, XM_012174614, XM_012174616, XM_012174617	TBC1 domain family, member 30	3:154821989-154867934:-1	11.272	3.664	2.535	5.381	5.051	10.968	3.09	2.888	6.07	7.654	10.931	3.774	1.537	4.457	2.751	10.05	3.545	2.569	8.853	6.732	9.114	3.047	3.305	7.932	6.012	8.351	2.564	1.965	5.127	5.898
TRIM68	ENSOARG00000000818	ENSOART00000000876.1, XM_004016261, XM_012095952	tripartite motif containing 68	15:48824712-48838540:1	9.995	4.301	3.419	4.543	7.042	10.928	3.37	5.067	5.513	7.288	8.461	2.707	3.177	5.39	5.128	11.274	6.183	5.696	7.138	8.007	9.559	4.674	3.916	6.044	8.393	11.171	3.423	3.578	6.409	8.951
TGS1	ENSOARG00000014613	ENSOART00000015909.1, XM_012183714, XM_012183715, XM_012183716, XM_012183717, XM_012183718, XM_012183719	trimethylguanosine synthase 1	9:35905636-35930276:1	8.391	4.334	7.179	10.543	4.327	7.958	5.223	8.822	11.275	5.475	10.056	4.066	7.123	9.58	3.256	7.491	4.587	5.303	7.177	4.429	8.157	4.715	6.798	8.314	4.909	8.796	4.077	6.514	9.522	5.041
ENSOARG00000007891	ENSOARG00000007891	ENSOART00000008591.1	no description available	6:102692980-102693165:-1	5.37	3.024	6.468	7.263	7.824	5.976	3.287	5.375	3.332	3.749	3.802	6.473	4.414	2.762	6.625	6.597	7.226	1.836	3.375	1.706	7.208	11.277	3.811	7.232	8.102	5.859	5.832	2.684	8.908	3.641
OPRL1	ENSOARG00000008141	ENSOART00000008860.1, XM_012188800, XM_012188801, XM_012188802, XM_012188804, XM_012188805, XM_012188806, XM_012188807, XM_012188808, XM_012188809, XM_012188810, XM_012188811, XM_012188812, XM_012188813, XM_012188814, XM_012188815, XM_012188816, XM_012188817	opiate receptor-like 1	13:53101847-53107546:-1	11.286	5.947	3.47	5.216	6.128	8.961	6.077	6.245	6.019	7.182	8.906	5.089	4.189	5.725	3.527	8.318	7.638	5.164	6.177	7.446	9.363	6.677	5.298	6.433	7.257	10.946	7.103	5.558	6.905	8.513
SH3GL2	ENSOARG00000014106	ENSOART00000015363.1	SH3 domain containing GRB2 like 2, endophilin A1	2:85475187-85651232:1	11.289	7.773	6.504	6.661	5.419	5.124	3.929	3.357	3.269	3.435	6.678	3.964	3.811	4.031	1.889	8.717	6.277	6.139	8.032	6.327	8.055	5.981	4.617	5.346	5.399	7.704	6.553	5.184	6.363	5.98
SMG1	ENSOARG00000010928	ENSOART00000011903.1, ENSOART00000011912.1, XM_012104158, XM_012104160	SMG1 phosphatidylinositol 3-kinase-related kinase	24:16406868-16464595:-1	9.861	8.536	7.417	8.617	6.635	11.289	10.228	9.258	9.212	8.85	10.97	7.199	6.339	8.882	7.372	9.254	6.934	6.897	9.861	5.696	9.222	8.619	9.679	8.482	7.557	10.29	8.756	9.128	8.764	9.159
TMEM52B	ENSOARG00000021011	ENSOART00000022890.1	transmembrane protein 52B	3:204422297-204430861:-1	11.291	6.002	5.822	7.583	9.722	10.309	6.306	4.849	8.459	10.005	10.789	5.292	3.628	8.807	10.34	9.479	5.791	5.78	10.2	6.982	9.548	6.283	4.91	8.186	4.398	9.482	5.731	5.21	7.376	7.198
SLC1A4	ENSOARG00000020004	ENSOART00000021782.1, XM_012168282	solute carrier family 1 (glutamate/neutral amino acid transporter), member 4	3:43165437-43193492:-1	2.221	1.659	0.327	0.484	1.03	7.067	2.366	1.054	1.156	4.806	4.138	1.795	0.494	0.551	0.98	11.298	3.734	1.682	1.31	5.445	2.807	1.694	0.652	0.462	0.877	5.567	2.35	0.775	0.768	2.632
SLC9B2	ENSOARG00000011794	ENSOART00000012826.1, XM_012179603	solute carrier family 9, subfamily B (NHA2, cation proton antiporter 2), member 2	6:21897632-21959511:1	7.514	5.572	3.147	3.121	5.245	6.225	4.615	3.719	4.043	8.108	7.618	4.948	2.261	2.727	3.349	8.906	5.552	3.259	4.777	6.634	9.613	6.335	5.206	5.235	7.347	11.3	6.931	4.821	4.32	8.005
MRRF	ENSOARG00000014134	ENSOART00000015394.1, XM_012163742	mitochondrial ribosome recycling factor	3:13474237-13505413:-1	9.81	8.037	4.379	6.46	5.6	10.668	8.319	8.435	10.052	9.531	11.301	9.424	5.126	7.321	4.919	11.298	10.53	8.52	10.496	10.255	10.843	7.828	7.944	9.712	9.649	10.333	7.705	5.384	8.985	8.302
F2R	ENSOARG00000016937	ENSOART00000018449.1, XM_012180672	coagulation factor II (thrombin) receptor	7:7741214-7762294:1	4.584	3.189	1.554	1.984	6.598	3.818	3.221	1.105	1.374	11.302	10.024	7.161	3.193	3.115	10.409	2.442	2.925	1.538	1.825	4.27	3.158	3.065	1.58	2.12	5.108	4.435	2.377	0.987	0.948	5.385
SETDB1	ENSOARG00000020880	ENSOART00000022750.1, XM_004002466, XM_012180691, XM_012180695, XM_012180707	SET domain, bifurcated 1	1:99798974-99828114:1	9.783	3.896	4.768	6.068	6.403	9.907	4.23	6.791	7.814	8.911	11.303	3.52	6.052	8.65	5.523	10.073	6.373	7.816	10.191	8.23	8.188	6.325	6.367	7.321	8.351	9.313	4.464	5.674	7.708	8.129
SOS2	ENSOARG00000020627	ENSOART00000022473.1, XM_004010508	son of sevenless homolog 2 (Drosophila)	7:40136171-40236512:-1	11.278	2.782	2.782	6.094	4.692	10.869	3.184	3.423	7.608	6.633	10.896	3.121	2.677	7.314	4.455	11.304	4.342	3.609	8.951	5.961	10.491	3.744	4	7.574	5.83	10.386	3.332	3.581	6.948	6.121
ROM1	ENSOARG00000015011	ENSOART00000016335.1, XM_004019602	retinal outer segment membrane protein 1	21:40343485-40345479:1	5.453	3.359	4.087	5.186	9.245	2.34	2.124	1.845	2.582	6.341	5.442	4.468	4.214	5.094	11.306	1.987	1.606	1.669	1.723	2.716	2.846	2.648	2.559	2.544	3.563	2.292	1.504	1.929	2.269	3.822
LOC101103343	101103343	XM_004015281, XM_012190472	carcinoembryonic antigen-related cell adhesion molecule 6	14:49865357-49880505:1	7.118	4.045	2.254	2.971	4.238	11.31	6.612	3.677	2.834	7.641	8.422	3.916	2.516	4.421	5.547	10.395	8.21	6.71	9.528	5.126	9.581	5.922	1.834	3.124	4.105	8.615	4.459	4.093	4.348	5.455
LOC100528013	100528013	NM_001199794, XM_012159068	chromosome unknown open reading frame, human C12orf29	3:124228518-124238116:1	11.323	2.781	3.119	4.685	3.596	2.433	1.743	2.695	4.145	2.64	8.968	3.99	3.214	6.719	2.712	9.396	8.482	6.199	10.896	6.231	8.36	5.082	5.423	8.739	5.694	7.277	4.49	5.12	7.027	5.34
C6orf58	ENSOARG00000007593	ENSOART00000008266.1	chromosome 6 open reading frame 58	8:10883260-10897885:-1	4.474	3.689	5.919	6.865	2.186	4.551	5.593	7.778	7.436	3.109	4.838	4.772	7.769	11.325	2.544	3.455	4.736	5.485	4.994	1.517	2.86	3.186	2.373	3.097	1.285	4.094	3.566	4.739	3.94	1.587
LSMEM1	ENSOARG00000002320	ENSOART00000002508.1, XM_012176783	leucine-rich single-pass membrane protein 1	4:55880808-55886893:-1	4.73	8.729	1.882	2.135	4.351	3.631	7.424	1.122	2.676	4.954	2.556	4.984	3	0.28	1.236	4.37	9.128	3.29	2.61	2.642	5.808	11.33	3.096	4.37	4.243	5.372	10.684	4.014	2.664	4.984
CLEC1A	ENSOARG00000021016	ENSOART00000022897.1, XM_012175405, XM_012175406	C-type lectin domain family 1, member A	3:204507774-204518162:1	3.083	1.8	1.401	0.931	1.429	11.332	2.948	2.322	1.38	3.624	3.901	1.58	1.113	0.849	0.926	6.8	3.315	2.908	3.524	3.328	1.031	0.601	0.381	0.984	2.266	4.884	2.258	2.029	1.774	2.711
FOCAD	ENSOARG00000014316	ENSOART00000015598.1, XM_004004398	focadhesin	2:88512471-88787659:1	7.901	4.582	2.523	4.201	3.651	8.961	4.177	3.147	6.664	5.101	8.101	3.598	2.116	2.798	1.122	7.704	4.434	3.385	5.921	4.482	9.844	4.583	3.745	6.779	5.447	11.333	6.345	4.788	8.132	6.163
USPL1	ENSOARG00000011882	ENSOART00000012923.1, XM_004012142, XM_012184629	ubiquitin specific peptidase like 1	10:30431983-30459700:-1	10.17	7.41	8.192	7.862	5.09	11.351	7.999	7.293	7.699	7.711	9.4	6.299	6.618	5.455	3.656	10.21	6.599	6.668	7.375	5.309	10.42	6.822	7.104	6.669	6.327	11.144	7.146	7.332	8.068	7.555
LOC105606140	105606140	XM_012108415	trinucleotide repeat-containing gene 18 protein-like	JH924865.1:354-1482:1	1.491	3.02	2.902	0.969	9.462	1.405	4.282	2.486	0.597	11.354	1.936	3.717	2.576	0.39	8.716	0.969	2.31	2.238	1.161	8.289	0.905	3.912	3.151	0.862	7.062	1.519	4.701	3.894	0.703	9.722
HPF1	ENSOARG00000015471	ENSOART00000016835.1	histone PARylation factor 1	2:110264039-110278276:1	7.022	4.56	1.356	2.024	3.957	6.293	3.359	2.396	3.757	8.252	6.692	3.666	0.541	1.128	0.526	5.512	2.082	2.531	2.578	7.191	10.318	7.207	4.121	5.754	9.702	11.358	6.931	3.162	5.214	11.255
TRIM14	101103791	XM_004005270	tripartite motif containing 14	2:49318841-49344169:1	3.464	5.825	3.253	4.256	7.325	3.571	6.232	4.082	4.621	6.72	4.243	3.356	6.383	3.573	3.61	4.01	2.722	4.304	5.32	6.855	4.415	2.899	6.633	6.635	11.358	5.062	2.513	4.17	5.09	10.021
STX18	ENSOARG00000007436	ENSOART00000008097.1, XM_004009991, XM_012180337, XM_012180339, XM_012180340	syntaxin 18	6:104234499-104302844:1	10.565	7.011	3.601	4.119	7.407	9.659	6.3	4.298	5.58	11.36	10.03	6.223	2.124	3.726	5.423	8.05	5.934	5.459	6.223	8.275	9.576	7.312	6.741	6.108	8.593	8.779	8.198	5.102	5.808	10.285
ASMTL	ENSOARG00000007783	ENSOART00000008473.1	acetylserotonin O-methyltransferase like	X:621541-640694:-1	9.858	10.337	5.905	6.44	6.45	8.904	9.354	5.947	6.161	10.715	9.63	9.051	5.645	4.898	3.869	10.792	6.768	7.71	6.51	8.554	10.84	10.575	10.202	9.207	8.956	11.361	10.737	6.61	7.404	9.21
NRBP2	ENSOARG00000016112	ENSOART00000017549.1, XM_012183457, XM_012183458	nuclear receptor binding protein 2	9:13902220-13906048:1	6.388	6.945	4.246	3.99	5.979	10.71	9.389	6.015	5.586	11.361	9.171	5.873	3.265	3.612	4.898	9.39	7.06	7.548	5.542	7.136	7.69	7.856	6.05	6.993	5.772	8.894	7.324	6.824	5.371	7.632
MCCD1	ENSOARG00000008895	ENSOART00000009683.1, XM_004019266	mitochondrial coiled-coil domain 1	20:26897157-26904361:-1	11.366	5.083	2.501	7.123	2.294	6.824	6.13	2.557	6.341	2.797	6.775	3.113	2.159	6.317	4.516	5.656	3.492	2.652	5.099	3.202	6.325	1.955	3.276	7.253	3.738	8.367	2.077	2.47	6.775	5.068
LOC105608348	105608348	XM_012189733, XM_012189734, XM_012189735	uncharacterized LOC105608348	14:16664683-16675239:1	0.492	0	0.085	0.646	0.17	0.451	0	0.204	0.404	0	0.813	0.108	0.104	0.312	0.165	3.233	9.874	7.681	3.044	6.823	3.516	5.613	8.636	2.151	6.175	3.497	8.19	10.648	2.738	11.369
ZCCHC12	101107078	XM_004022716, XM_012107483, XM_012107484	zinc finger, CCHC domain containing 12	X:109942256-109945852:-1	1.498	2.171	0.922	0.68	0.285	6.695	4.443	4.841	2.144	0.586	0.98	0.988	0.422	0.487	0.071	6.129	11.369	6.481	3.667	0.641	3.601	3.423	3.538	1.491	0.05	2.304	2.471	1.939	1.445	0.306
KAT14	ENSOARG00000018339	ENSOART00000019958.1	lysine acetyltransferase 14	13:37462119-37487661:1	10.558	6.203	7.616	6.839	7.616	8.423	6.254	10.407	7.949	10.724	11.378	5.01	5.447	5.697	6.11	8.573	6.813	7.418	6.738	8.876	7.918	7.637	9.711	7.571	9.31	9.824	7.608	10.675	8.51	10.166
MSH3	ENSOARG00000014867	ENSOART00000016185.1, ENSOART00000016187.1, XM_004009055	mutS homolog 3	5:78070365-78262813:1	11.196	3.208	2.263	4.745	3.716	10.382	3.673	2.716	6.852	6.302	10.035	3.63	2.242	2.788	1.473	10.05	4.267	2.978	5.676	4.419	10.339	4.041	3.02	8.108	5.182	11.382	4.16	2.49	5.839	6.805
PHF10/101115467	101115467	XM_004011454, XM_012183290, XM_012183291, XM_012183293, XM_012183294, XM_012183295, XM_012183296	PHD finger protein 10	8:90119240-90131950:-1	5.809	9.37	5.924	3.547	9.191	5.414	6.518	3.981	2.48	11.383	6.917	8.624	3.698	2.503	6.09	4.602	5.082	3.974	2.59	8.799	5.175	5.979	5.231	3.584	6.987	4.854	8.037	4.113	2.869	8.801
TMEM131L	ENSOARG00000002381	ENSOART00000002585.1, ENSOART00000002587.1	transmembrane 131 like	17:3874234-4046549:-1	6.902	7.496	4.262	3.822	6.221	6.249	11.383	6.408	4.66	8.422	7.374	6.979	4.362	3.02	4.896	5.136	10.655	9.783	5.399	4.867	5.159	6.516	2.905	5.363	5.471	5.039	4.267	2.533	2.981	6.387
RNF168	ENSOARG00000020335	ENSOART00000022143.1, XM_004003008	ring finger protein 168, E3 ubiquitin protein ligase	1:189268898-189286854:-1	11.391	6.499	5.679	7.224	6.117	11.053	5.128	5.873	7.462	8.168	9.738	5.803	6.139	7.539	4.195	10.155	7.156	5.429	8.628	6.576	9.684	6.397	5.883	8.194	7.735	10.287	6.658	6.379	7.615	7.133
IPO8	ENSOARG00000019534	ENSOART00000021275.1, XM_004006750, XM_012175076	importin 8	3:183546925-183616366:1	11.003	6.224	5.464	6.694	7.442	8.084	5.415	6.179	7.81	11.024	11.392	7.444	5.047	7.356	6.768	6.892	5.788	5.642	7.439	8.174	9.743	8.063	8.238	8.795	10.088	9.457	6.737	5.695	6.514	11.372
ERCC4	ENSOARG00000007323	ENSOART00000007970.1, XM_012104127	excision repair cross-complementation group 4	24:12796887-12838115:1	9.941	5.249	5.54	8.847	7.495	7.958	5.646	9.483	10.78	10.868	10.763	4.4	4.685	10.11	7.105	7.143	4.237	6.396	10.665	6.381	7.824	7.037	8.033	9.408	6.749	11.393	4.986	6.849	10.986	9.259
YLPM1	ENSOARG00000001426	ENSOART00000001535.1, ENSOART00000001540.1, XM_004010791	YLP motif containing 1	7:82931450-82994046:1	1.943	6.574	5.335	1.146	7.472	1.436	6.361	6.816	1.058	11.393	1.721	8.072	6.097	0.909	6.171	1.132	6.434	6.984	1.012	7.886	1.392	7.399	7.603	1.153	8.376	1.283	7.003	5.965	0.903	10.368
ZNF436	ENSOARG00000007586	ENSOART00000008260.1, XM_012152353, XM_012152355	zinc finger protein 436	2:242367136-242375207:1	7.865	4.815	4.149	6.94	5.014	9.205	6.234	6.652	11.398	6.955	9.506	5.874	3.882	9.831	5.304	7.54	4.638	4.975	9.12	4.87	6.746	4.525	4.826	6.995	4.219	7.514	4.156	5.018	7.305	6.027
CMTM4	ENSOARG00000002082	ENSOART00000002239.1, XM_012189879	CKLF-like MARVEL transmembrane domain containing 4	14:33721793-33731683:-1	3.959	1.988	1.477	0.481	0.889	11.4	6.545	2.495	1.921	7.879	4.734	3.22	1.311	0.431	1.766	4.475	3.089	1.676	1.16	3.036	6.154	3.978	2.889	1.99	3.88	5.796	2.178	1.818	1.48	3.81
ESCO2	ENSOARG00000014845	ENSOART00000016158.1, XM_004004434	establishment of sister chromatid cohesion N-acetyltransferase 2	2:100985139-101013037:1	7.262	1.857	1.136	2.517	1.98	7.171	2.217	1.933	3.032	4.785	11.402	3.398	1.795	4.292	1.284	3.992	1.411	0.86	1.801	2.981	6.343	1.936	1.676	2.903	3.707	9.923	2.321	2.482	3.811	5.334
GYPC	100885767	XM_004004772, XM_012140664	glycophorin C (Gerbich blood group)	2:191527332-191576032:1	6.61	10.255	4.045	3.043	1.171	8.122	5.033	6.116	3.726	6.975	11.144	9.817	6.484	4.243	0.4	11.403	3.314	3.852	6.786	6.942	6.48	7.337	5.172	4.145	6.463	5.118	4.077	3.782	2.173	7.384
TMEM209	ENSOARG00000005027	ENSOART00000005475.1, XM_004008061, XM_012177135, XM_012177136, XM_012177139	transmembrane protein 209	4:93987154-94013839:-1	8.867	8.261	5.566	6.988	6.607	7.684	6.942	10.269	9.262	9.843	9.684	8.454	5.711	5.877	4.721	7.297	7.863	7.154	8.535	9.691	9.331	9.724	8.743	9.46	10.058	11.24	11.145	10.153	9.129	11.409
SNRK	ENSOARG00000004010	ENSOART00000004360.1, XM_012100334	SNF related kinase	19:15149344-15224222:1	10.604	4.211	3.585	6.527	6.019	9.928	4.346	3.919	7.567	7.456	11.411	4.598	2.335	7.257	6.373	9.793	8.771	4.772	8.958	4.471	7.856	4.315	4.338	6.973	4.09	8.734	3.961	2.657	6.032	5.797
SH2D4B	ENSOARG00000010332	ENSOART00000011242.1, XM_012105426	SH2 domain containing 4B	25:35538092-35616348:1	5.053	9.643	7.163	3.226	11.412	6.166	9.865	6.007	3.872	11.222	5.507	6.687	3.454	2.565	9.447	6.237	10.037	6.736	4.223	9.985	5.148	9.845	8.949	5.845	8.419	5.118	7.926	8.145	3.6	9.323
GTF3C3	ENSOARG00000014975	ENSOART00000016299.1, XM_012141219	general transcription factor IIIC, polypeptide 3, 102kDa	2:198049129-198075761:-1	10.396	4.436	4.571	7.57	5.082	11.152	4.532	7.796	11.421	6.811	9.99	3.366	4.837	9.617	4.826	9.761	4.791	6.38	9.117	6.586	9.565	5.166	6.076	9.61	6.655	9.316	4.187	5.134	9.896	6.362
NF2	ENSOARG00000004984	ENSOART00000005432.1, XM_004017463, XM_012098031	neurofibromin 2 (merlin)	17:68309095-68347510:1	8.29	7.591	7.043	7.233	9.901	6.761	7.743	8.348	10.154	11.421	9.693	8.928	5.194	8.241	7.456	7.363	7.265	8.655	9.299	9.269	8.243	9.898	9.855	9.938	8.973	9.299	9.618	8.014	8.239	10.54
ENSOARG00000018029	ENSOARG00000018029	ENSOART00000019623.1	no description available	JH922744.1:2-547:-1	3.614	1.789	1.596	2.499	1.961	7.599	5.756	9.1	7.994	9.034	11.422	5.201	4.918	6.601	5.35	5.731	3.027	3.79	5.97	3.514	7.717	6.262	6.996	8.04	6.301	3.402	1.479	1.374	2.697	2.494
THNSL1	ENSOARG00000003588	ENSOART00000003897.1, XM_012188372, XM_012188373, XM_012188374	threonine synthase-like 1 (S. cerevisiae)	13:24901048-24914561:1	4.76	1.684	0.935	1.809	1.741	6.108	1.704	1.8	3.501	2.647	3.03	1.295	0.856	1.652	0.696	8.046	5.101	2.725	5.958	3.137	11.424	3.98	2.375	6.158	5.641	6.097	1.953	1.258	3.282	3.634
ENSOARG00000007971	ENSOARG00000007971	ENSOART00000008680.1	no description available	12:4582491-4601032:1	8.893	2.825	4.312	4.505	4.92	2.073	2.053	2.361	2.789	7.241	6.64	3.92	3.55	3.637	6.382	3.558	4.483	4.678	5.705	11.428	4.372	4.494	3.526	4.197	4.992	5.341	4.791	3.34	4.374	5.723
ABCB6	ENSOARG00000019920	ENSOART00000021689.1, XM_004004943, XM_012146468, XM_012146475, XM_012146477	ATP-binding cassette, sub-family B (MDR/TAP), member 6 (Langereis blood group)	2:220139378-220146020:-1	8.775	5.519	3.54	3.829	5.22	7.321	3.695	3.339	3.771	6.659	7.739	4.426	1.956	1.946	2.107	9.196	5.291	4.528	5.455	7.251	9.411	5.019	4.83	5.889	7.549	11.429	7.839	5.707	5.752	9.064
ATXN7L1/101123462	101123462	XM_012176687, XM_012176688, XM_012176690, XM_012176691, XM_012176692, XM_012176693, XM_012176694, XM_012176695, XM_012176696, XM_012176697, XM_012176698	ataxin 7-like 1	4:46854762-46974788:-1	7.934	4.761	4.756	6.024	5.521	11.433	6.378	8.33	9.586	5.868	8.622	3.964	7.077	7.148	4.72	9.947	6.99	8.628	10.375	7.408	9.406	8.356	7.59	11.17	6.654	8.553	6.487	6.875	8.662	7.233
ENSOARG00000017632	ENSOARG00000017632	ENSOART00000019183.1	no description available	JH921633.1:2214-2414:1	1.834	3.117	1.333	0.943	0.583	3.795	1.375	0.735	1.738	0	7.109	11.437	5.816	2.767	2.431	6.352	5.919	3.006	3.603	0	2.799	1.234	0.781	0.913	0	1.131	2.407	0	0.456	1.216
ENSOARG00000001989	ENSOARG00000001989	ENSOART00000002140.1	no description available	JH922545.1:21-19174:1	9.536	5.506	6.263	11.447	6.059	9.302	5.499	6.915	7.967	5.916	9.163	5.945	7.059	9.18	6.642	7.244	6.814	5.17	8.686	5.425	9.415	7.158	6.793	9.584	7.337	6.597	3.304	3.851	7.946	4.42
TCAIM	ENSOARG00000004419	ENSOART00000004809.1, XM_004018258, XM_012099469, XM_012099470, XM_012099471	T cell activation inhibitor, mitochondrial	19:16163460-16200222:1	11.449	2.434	2.847	6.29	5.82	6.437	1.38	2.186	6.596	5.317	10.076	3.379	1.974	7.621	3.972	3.715	1.728	2.575	5.443	4.013	5.627	1.774	2.322	6.318	4.757	6.665	2.011	1.892	6.039	6.193
CRYBB1	ENSOARG00000001548	ENSOART00000001666.1, XM_012098194	crystallin, beta B1	17:65956619-65985548:-1	6.758	9.29	6.245	4.189	3.849	11.451	9.754	8.982	6.836	4.523	7.091	6.834	5.207	4.284	2.553	4.856	4.113	3.322	3.233	2.322	6.8	6.021	5.145	3.977	4.107	2.829	3.857	3.797	2.246	2.674
SRBD1	ENSOARG00000005958	ENSOART00000006481.1, XM_004005979, XM_012172342	S1 RNA binding domain 1	3:78659114-78886415:1	10.997	4.215	3.209	6.631	5.575	7.619	2.739	2.815	8.327	5.34	9.581	4.015	2.085	5.872	11.261	5.449	2.694	2.186	5.324	4.176	10.52	5.055	4.288	9.573	7.001	11.453	5.528	4.056	10.097	9.183
CHST3	ENSOARG00000007016	ENSOART00000007630.1, XM_004021445, XM_012105238, XM_012105239, XM_012105240, XM_012105241, XM_012105242	carbohydrate (chondroitin 6) sulfotransferase 3	25:27941957-27962503:1	0.018	0.856	0.73	0.173	0.375	0.032	11.456	10.943	3.477	0.564	0.027	2.579	6.874	2.783	0.912	0.102	3.378	6.772	1.506	0.601	0.106	1.037	0.62	0.244	0.144	0.153	5.505	6.005	0.829	0.415
FOXM1	ENSOARG00000011054	ENSOART00000012027.1, XM_012175561, XM_012175562, XM_012175563	forkhead box M1	3:210881577-210893401:1	3.505	5.385	3.545	1.358	6.767	3.047	5.587	4.197	1.586	10.586	5.367	5.542	2.946	2.802	3.268	1.571	2.442	2.395	1.009	6.153	3.807	6.337	5.934	2.753	8.723	3.721	5.191	5.478	2.062	11.456
MFSD8	ENSOARG00000015603	ENSOART00000016976.1, XM_012097503, XM_012097504, XM_012097505	major facilitator superfamily domain containing 8	17:29497526-29536367:1	8.879	4.696	3.667	6.367	6.01	10.257	4.237	5.545	8.801	7.276	8.67	4.135	2.856	6.197	3.157	10.408	7.947	6.067	9.917	7.256	11.18	7.454	6.949	11.458	9.606	11.191	5.406	4.287	8.435	8.471
KIAA1522	ENSOARG00000020909	ENSOART00000022780.1, XM_012156925	KIAA1522 ortholog	2:233965559-233977609:-1	1.541	6.773	1.804	1.033	7.574	2.997	10.32	5.452	2.709	11.46	1.572	2.314	0.757	0.962	4.122	3.282	6.777	5.149	3.167	8.013	4.119	9.261	7.798	3.931	10.32	2.174	6.555	4.006	1.506	7.615
SLC18B1	ENSOARG00000014510	ENSOART00000015796.1, XM_012182921, XM_012182922	solute carrier family 18, subfamily B, member 1	8:57976271-58011243:-1	8.959	6.123	4.652	7.742	4.547	10.597	6.783	5.276	9.346	5.711	11.463	10.145	8.057	10.781	7.807	9.503	6.215	4.717	7.536	6.289	4.546	3.908	2.993	4.493	1.659	7.387	3.887	3.532	6.347	5.023
PTGR2	ENSOARG00000000726	ENSOART00000000780.1, ENSOART00000000782.1	prostaglandin reductase 2 [Source:NCBI gene;Acc:506263] (assigned to orthologue: ENSBTAG00000003747)	7:82177260-82193686:1	10.161	4.596	3.858	4.991	3.395	8.951	5.245	4.387	6.304	4.997	11.465	5.782	3.926	5.774	2.643	8.979	6.213	3.787	6.046	5.582	8.385	4.849	4.404	6.471	4.666	7.419	3.447	3.69	5.55	4.597
C14H19orf12	101106870	XM_012190094, XM_012190095	chromosome 14 open reading frame, human C19orf12	14:39594433-39604664:-1	5.796	3.298	3.105	1.637	4.753	6.068	5.085	3.253	6.308	8.43	9.817	5.091	0.962	2.355	9.278	5.39	2.085	5.055	4.779	11.467	6.769	5.59	6.903	7.035	7.83	8.257	7.954	6.755	5.45	9.051
TMEM194B	101119376	XM_012130841, XM_012130849, XM_012130854, XM_012130856, XM_012130862, XM_012130870, XM_012130880	transmembrane protein 194B	2:117644985-117669486:1	8.695	6.405	4.852	7.495	6.285	11.468	8.226	7.022	9.913	8.431	9.623	6.741	4.697	9.06	7.131	9.42	4.979	4.309	6.877	7.759	6.171	3.668	3.449	4.943	4.887	6.034	3.587	2.422	3.582	4.56
WDR44	ENSOARG00000016803	ENSOART00000018300.1	WD repeat domain 44	X:110841181-110928373:-1	9.072	3.409	2.596	5.688	5.735	10.479	3.809	3.132	6.928	7.414	9.26	3.958	2.429	8.324	7.581	9.254	4.648	4.145	11.149	6.348	11.473	5.308	5.127	8.845	6.191	10.469	4.517	4.49	7.241	7.107
SMYD3	101116161	XM_004013647, XM_012187175, XM_012187176, XM_012187177, XM_012187178, XM_012187179, XM_012187180	SET and MYND domain containing 3	12:29114280-29747960:1	8.7	3.82	2.661	2.353	4.795	10.634	4.501	2.975	3.993	6.546	11.475	6.32	3.015	1.827	2.115	11.35	8.719	6.367	6.58	9.86	9.539	5.415	4.406	6.373	8.461	7.742	4.619	3.767	3.763	7.312
VPS8	ENSOARG00000020572	ENSOART00000022414.1, XM_004003082, XM_012097837, XM_012097847, XM_012097855	vacuolar protein sorting 8 homolog (S. cerevisiae)	1:200360425-200605789:-1	5.56	4.784	3.23	3.503	6.218	6.964	4.006	3.453	6.034	7.718	4.882	5.54	2.571	3.028	4.297	4.363	5.039	3.926	4.708	6.427	11.481	5.583	4.635	10.017	8.198	8.031	5.538	3.472	6.286	8.969
ARHGEF10L	ENSOARG00000010812	ENSOART00000011769.1, XM_012157533	Rho guanine nucleotide exchange factor (GEF) 10-like	2:247798632-247936199:-1	2.494	3.08	0.685	0.55	2.467	11.483	5.553	3.394	3.169	11.332	1.643	1.069	0.437	0.41	1.367	9.034	6.156	2.755	4.171	7.52	8.767	7.43	5.281	5.624	9.345	8.351	7.496	4.244	3.307	8.779
ADORA2B	ENSOARG00000017486	ENSOART00000019033.1, XM_012186731	adenosine A2b receptor	11:33039509-33060778:-1	8.541	6.495	5.715	7.375	11.493	8.022	2.986	1.784	2.754	7.407	5.945	5.124	1.407	1.95	11.031	3.302	5.916	1.156	1.512	2.203	7.088	3.442	3.822	6.421	5.905	4.352	3.44	1.716	3.145	2.919
ALKBH1	ENSOARG00000002621	ENSOART00000002841.1, XM_004011087	alkB, alkylation repair homolog 1 (E. coli)	7:85772137-85795825:-1	9.069	5.591	7.558	8.415	5.905	9.862	6.102	9.217	11.498	10.064	10.885	4.994	6.597	7.886	4.748	7.236	6.268	6.885	9.122	5.775	10.354	7.826	7.807	9.779	7.671	8.927	5.532	7.046	9.6	7.086
ENSOARG00000014850	ENSOARG00000014850	ENSOART00000016162.1	no description available	14:56441193-56449795:-1	8.492	8.835	6.524	4.723	4.228	5.634	5.494	4.809	2.916	4.997	11.502	9.975	7.597	3.151	0.48	3.952	3.528	2.544	1.135	3.332	1.091	1.303	1.198	0.808	2.087	2.698	2.156	0.144	0.366	1.57
SLC27A4	ENSOARG00000010421	ENSOART00000011343.1, XM_012162017, XM_012162025	solute carrier family 27 (fatty acid transporter), member 4	3:7850729-7863183:-1	5.848	6.355	4.17	3.083	6.686	7.149	7.871	5.76	4.935	11.518	7.447	5.128	2.169	2.504	7.322	5.962	5.274	5.507	5.632	5.726	9.942	10.074	8.873	8.168	8.65	8.62	8.126	5.094	4.598	6.992
LOC101121602	101121602	XM_012178612, XM_012178613, XM_012178614, XM_012178615	ankyrin repeat and KH domain-containing protein 1	5:48996446-49054803:1	9.378	6.103	3.846	6.182	4.278	9.95	5.547	6.587	6.675	7.95	11.52	5.665	6.202	6.93	3.772	8.981	9.078	6.238	7.868	5.054	8.068	4.831	6.697	6.77	4.676	9.617	3.248	5.381	7.538	7.429
USP30	ENSOARG00000017038	ENSOART00000018554.1, XM_012097945	ubiquitin specific peptidase 30	17:63661912-63683414:-1	7.309	7.603	8.94	5.567	8.906	6.202	9.075	11.07	5.602	11.52	9.677	9.257	7.523	7.408	7.208	7.128	9.363	11.049	7.968	10.53	6.111	9.24	10.217	6.057	9.273	7.071	7.583	9.163	5.407	9.346
MBLAC1	ENSOARG00000017861	ENSOART00000019433.1	metallo-beta-lactamase domain containing 1	24:36249218-36249991:-1	11.522	3.789	1.7	4.082	7.251	10.148	3.727	3.486	5.628	11.441	10.002	2.499	1.148	3.447	5.559	9.753	3.01	2.746	6.142	5.358	9.295	3.239	4.393	7.976	7.782	8.95	3.609	2.656	5.86	8.996
LOC101108449	101108449	XM_012108091	5-hydroxytryptamine receptor 3C-like	1:201301814-201312242:-1	6.802	5.423	6.665	9.393	5.054	7.253	7.149	7.347	11.527	5.712	7.38	5.479	5.799	8.585	5.145	7.629	6.643	8.606	9.793	4.532	11.295	9.068	7.103	9.458	4.973	8.692	7.136	7.788	8.721	6.451
ENSOARG00000013462	ENSOARG00000013462	ENSOART00000014647.1	no description available	5:4791238-4800242:-1	3.882	7.258	4.169	1.559	4.925	3.888	7.492	3.438	1.342	11.531	4.402	8.634	4.521	1.199	2.803	3.591	5.56	3.772	1.975	7.247	4.441	8.714	5.142	2.784	8.951	2.892	6.497	3.114	1.208	8.258
BRCA2	ENSOARG00000011179	ENSOART00000012162.1, ENSOART00000012164.1, XM_012184606, XM_012184607, XM_012184608	breast cancer 2, early onset	10:28883265-28925272:-1	10.34	2.549	1.261	2.988	3.651	9.653	2.538	1.333	3.169	6.87	11.533	3.423	1.497	3.107	1.939	4.462	1.59	1.069	2.526	3.221	7.428	2.331	1.699	4.216	3.532	9.587	2.229	1.728	3.243	5.842
ENSOARG00000014432	ENSOARG00000014432	ENSOART00000015716.1	no description available	X:104003099-104005121:-1	11.538	3.136	3.581	7.162	3.212	9.207	3.403	4.096	8.194	2.77	9.045	3.13	4.705	7.722	1.448	9.818	1.89	3.668	8.452	2.278	7.548	4.144	2.083	7.361	2.857	7.201	2.78	3.554	7.381	2.031
TIE1	ENSOARG00000020522	ENSOART00000022354.1, XM_012106421	tyrosine kinase with immunoglobulin-like and EGF-like domains 1	1:17757325-17776710:1	4.806	6.549	6.009	6.55	11.538	2.669	4.329	4.047	2.767	5.56	2.9	3.296	2.252	1.876	3.25	3.236	7.184	5.911	3.881	5.787	6.124	8.599	7.804	5.776	7.156	3.222	5.46	4.222	3.176	3.978
SIN3A	ENSOARG00000002221	ENSOART00000002400.1, ENSOART00000002401.1	SIN3 transcription regulator family member A	18:32306824-32350121:1	8.719	5.127	5.934	5.592	6.918	8.103	4.983	5.303	5.018	10.004	11.541	6.111	5.614	7.245	7.315	7.169	8.043	6.147	6.23	8.394	8.229	5.022	5.992	6.673	8.529	8.528	4.887	6.657	4.871	9.596
ALG8	ENSOARG00000006601	ENSOART00000007175.1	ALG8 alpha-1,3-glucosyltransferase	21:17334948-17360878:1	9.598	6.5	4.575	4.764	6.677	9.067	6.158	6.347	6.938	11.35	9.872	6.12	3.175	4.127	4.082	7.785	6.831	4.456	6.144	8.854	11.544	8.079	7.412	9.056	9.201	11.418	7.68	6.936	6.846	11.536
SCN1B	ENSOARG00000004677	ENSOART00000005089.1, XM_004015635	sodium channel, voltage gated, type I beta subunit	14:44872269-44881988:1	1.693	4.381	2.024	0.938	3.173	3.985	4.257	2.053	1.584	4.625	7.968	7.269	4.115	2.307	11.549	7.225	4.674	2.905	2.456	1.916	3.522	4.115	2.8	1.411	2.798	1.124	1.079	0.765	0.37	1.218
SPEN	ENSOARG00000008477	ENSOART00000009229.1, XM_012187469	spen family transcriptional repressor	12:49707784-49771238:-1	5.698	7.751	7.048	4.093	8.341	3.172	11.554	11.528	3.221	10.481	4.469	5.767	6.311	3.741	8.211	2.994	5.737	9.397	4.109	7.261	3.481	9.633	10.042	4.531	8.152	3.366	8.643	8.914	2.961	10.707
MID2	ENSOARG00000018590	ENSOART00000020235.1, XM_004022435, XM_012107585, XM_012107586, XM_012107587, XM_012107588	midline 2	X:120317855-120413381:-1	2.831	2.529	4.055	3.383	1.188	8.929	4.65	11.558	9.159	4.202	1.843	1.554	7.978	11.4	1.004	10.144	4.563	6.496	7.924	3.65	7.234	3.357	4.362	3.565	2.969	6.405	3.016	6.562	3.831	3.245
EZH1	ENSOARG00000003316	ENSOART00000003601.1, XM_004012941, XM_012186127, XM_012186129	enhancer of zeste 1 polycomb repressive complex 2 subunit	11:42244915-42268065:-1	11.566	3.636	2.858	4.794	8.454	8.855	3.103	4.072	4.292	8.913	9.809	3.338	1.711	4.566	5.207	9.594	6.734	4.003	4.69	8.443	7.327	3.626	4.018	5.796	8.263	7.247	2.642	3.496	5.147	7.026
ABCC5	ENSOARG00000020631	ENSOART00000022478.1, XM_004003102, XM_012098084, XM_012098088, XM_012098092, XM_012098097, XM_012098102	ATP-binding cassette, sub-family C (CFTR/MRP), member 5	1:201361873-201421053:1	7.415	3.348	2.204	1.581	2.702	11.573	5.869	2.294	1.868	8.479	8.87	5.601	1.753	1.304	2.417	9.446	6.267	3.263	4.071	7.177	7.044	4.641	3.477	3.013	6.506	6.442	4.93	2.705	2.356	4.617
CCDC71L	105615153	XM_012177425	coiled-coil domain containing 71-like	4:47824451-47825241:-1	4.887	5.687	5.912	6.803	8.267	5.074	7.998	11.586	10.916	7.312	3.16	3.032	7.057	9.036	7.021	4.11	4.999	11.145	8.199	5.315	4.056	5.832	6.455	6.728	5.397	4.35	4.025	3.582	7.222	5.348
AKNA	ENSOARG00000006030	ENSOART00000006566.1, XM_012112394	AT-hook transcription factor	2:9311658-9319420:1	5.61	4.897	6.308	5.032	10.542	4.598	3.573	4.112	3.316	11.588	6.544	5.888	4.372	4.317	9.902	4.713	5.183	4.547	3.757	11.293	4.025	3.965	6.27	5.05	9.021	4.153	4.548	5.721	3.774	10.589
ENSOARG00000001471	ENSOARG00000001471	ENSOART00000001575.1	no description available	JH923032.1:30636-37933:1	3.538	8.921	9.213	5.138	7.025	5.901	11.591	6.441	5.501	6.83	2.333	5.199	2.975	1.318	3.555	1.8	1.756	1.339	1.263	1.708	6.243	9.933	9.686	5.209	6.337	2.676	3.209	3.282	2.171	3.379
ZNF304	ENSOARG00000003611	ENSOART00000003915.1, XM_004015448	zinc finger protein 304	14:61483268-61490912:1	8.696	6.745	5.915	6.752	4.489	7.805	8.197	8.672	9.495	6.941	11.595	4.923	5.369	5.865	3.883	8.252	6.025	5.653	7.569	5.247	7.216	6.522	5.829	6.931	4.607	10.474	6.354	7.599	8.051	5.467
UROS	ENSOARG00000011550	ENSOART00000012562.1, XM_012103121, XM_012103122, XM_012103123, XM_012103124	uroporphyrinogen III synthase	22:44225391-44246301:-1	7.405	8.209	5.556	4.205	4.914	9.217	8.897	7.864	6.603	10.054	8.461	6.116	3.288	3.019	2.718	10.495	8.725	6.791	7.211	8.51	11.596	9.045	8.157	8.059	10.075	9.796	9.071	6.267	5.608	8.143
ZNF654	ENSOARG00000017077	ENSOART00000018588.1, XM_012188010, XM_012188023	zinc finger protein 654	1:154662551-154724547:1	11.487	3.337	4.121	8.027	4.797	11.295	3.742	5.3	7.8	6.963	11.599	2.786	4.239	8.798	5.861	10.597	3.332	3.482	7.906	4.441	10.014	4.19	5.807	10.442	5.935	11.307	2.946	5.202	9.088	7.089
C1H3orf17	101122825	XM_012190554, XM_012190558	chromosome 1 open reading frame, human C3orf17	1:176091871-176107196:-1	10.95	6.634	7.302	7.928	4.805	10.286	5.251	8.726	11.6	5.683	10.299	5.638	6.511	6.931	2.469	8.84	4.896	5.954	7.895	3.886	6.285	4.726	6.668	7.065	3.897	8.959	4.373	5.491	8.02	5.062
LOC105606093	105606093	XM_012108346	probable ATP-dependent RNA helicase DHX37	JH924365.1:16-3339:1	3.004	4.969	6.762	3.593	3.337	2.878	6.061	11.555	4.226	5.142	3.365	4.201	5.639	1.645	1.188	4.27	7.527	6.664	3.542	7.232	4.965	9.499	11.604	3.792	5.667	4.396	6.779	8.606	3.715	3.973
POLRMT	ENSOARG00000008898	ENSOART00000009694.1, XM_012179248	polymerase (RNA) mitochondrial (DNA directed)	5:40629867-40642083:-1	8.136	6.013	4.36	4.529	7.068	7.433	4.871	6.154	7.085	11.608	9.226	6.069	2.649	2.808	3.318	6.982	5.918	3.795	4.863	8.236	8.5	7.135	7.784	7.141	7.721	8.389	7.22	5.462	6.076	7.405
ENSOARG00000013541	ENSOARG00000013541	ENSOART00000014726.1	no description available	17:70586629-70594240:1	10.383	10.321	6.134	9.176	4.606	8.677	9.975	6.486	8.655	4.217	8.051	11.338	6.982	11.611	5.086	8.998	9.007	6.796	9.225	4.159	6.849	6.617	3.777	5.669	3.012	6.949	8.124	6.177	7.307	4.081
TULP4	ENSOARG00000004364	ENSOART00000004751.1, XM_012183339	tubby like protein 4	8:81435530-81595475:1	5.594	8.175	3.788	2.294	8.077	5.633	8.72	4.271	3.414	11.612	5.242	9.377	3.337	2.168	6.197	4.953	9.576	7.466	4.092	9.068	5.924	10.018	6.553	4.266	7.449	4.616	7.025	3.822	1.976	9.198
NCKAP5L	ENSOARG00000018288	ENSOART00000019902.1, XM_004006373	NCK-associated protein 5-like	3:136324643-136337149:1	4.658	4.446	2.673	2.746	10.929	4.596	3.945	2.792	2.463	11.618	6.103	4.693	2.35	2.746	6.094	4.15	3.823	1.762	2.166	7.866	6.113	5.165	5.609	4.59	8.832	4.272	4.237	3.277	2.829	8.737
AAR2	ENSOARG00000015597	ENSOART00000016968.1, XM_012189142, XM_012189143, XM_012189144	AAR2 splicing factor homolog (S. cerevisiae)	13:64926710-64946846:1	7.116	8.969	8.408	7.099	7.667	5.999	9.849	10.923	9.073	8.224	7.91	7.198	7.745	8.04	5.674	6.06	7.994	10.479	9.666	6.551	8.443	9.979	11.622	9.847	8.249	7.874	9.894	11.049	8.527	9.187
MOGAT1	101116385	XM_012147009	monoacylglycerol O-acyltransferase 1	2:223841327-223876917:1	7.008	0.617	3.362	7.15	11.622	0.532	0.668	1.412	2.158	1.398	4.15	1.265	1.437	1.557	3.119	0.842	0.909	0.739	1.974	1.48	2.241	1.999	2.466	4.862	3.649	0.988	1.652	1.018	2.094	0.856
PARP11	ENSOARG00000010367	ENSOART00000011281.1, XM_004006951, XM_012175552, XM_012175553, XM_012175554	poly (ADP-ribose) polymerase family, member 11	3:210108792-210120632:1	8.511	5.408	5.091	6.87	5.838	7.392	4.631	6.944	7.674	6.425	9.145	5.558	7.619	11.625	5.866	8.571	5.91	8.458	8.993	5.945	8.651	5.897	4.568	8.426	7.757	7.912	4.458	4.626	6.287	5.532
LTF	ENSOARG00000008620	ENSOART00000009392.1, NM_001024862	lactotransferrin	19:52870333-52900317:1	2.717	2.42	1.581	2.462	0.833	9.493	9.521	8.081	4.988	5.092	3.809	1.429	1.814	2.552	1.121	11.629	8.791	9.314	9.388	6.965	2.816	1.987	1.912	2.727	1.531	4.672	3.896	5.443	3.339	2.495
NT5C	ENSOARG00000011243	ENSOART00000012222.1	5', 3'-nucleotidase, cytosolic	11:55320196-55321611:1	8.922	8.753	6.782	8.921	9.384	7.446	6.865	6.877	8.137	10.67	11.638	7.562	6.688	6.001	6.729	8.341	4.535	5.514	6.532	8.405	8.318	8.118	7.003	6.857	6.228	10.819	8.697	5.679	7.966	10.609
LOC101113786	101113786	XM_012094862, XM_012094863, XM_012094864, XM_012094865	zinc finger protein OZF-like	14:61601850-61605652:1	8.892	6.175	7.547	10.006	4.785	6.279	5.709	8.956	11.64	4.669	9.659	5.08	5.808	10.276	3.195	7.178	5.76	6.149	8.351	4.552	6.088	4.895	4.987	7.8	4.275	7.794	3.809	6.85	8.77	4.648
CDC42EP1	ENSOARG00000013750	ENSOART00000014962.1, XM_004006975	CDC42 effector protein (Rho GTPase binding) 1	3:213415143-213422281:1	4.965	6.26	4.005	2.583	10.036	2.171	5.378	1.327	0.972	6.359	5.442	6	4.301	2.021	11.641	1.375	2.016	0.879	1.459	3.909	2.465	2.601	1.247	2.411	3.447	1.784	3.029	1.384	1.117	3.292
ENSOARG00000018998	ENSOARG00000018998	ENSOART00000020684.1	no description available	3:33803408-33807479:1	8.004	9.109	7.847	7.644	4.112	3.706	4.785	6.822	4.13	5.611	6.221	6.729	7.496	4.651	1.761	3.424	3.02	3.41	4.037	6.297	5.703	9.595	9.09	7.184	5.23	5.008	6.064	8.78	5.228	11.642
SLC6A12	ENSOARG00000011751	ENSOART00000012781.1, XM_012176142	solute carrier family 6 (neurotransmitter transporter), member 12	3:211136648-211156189:-1	3.594	2.142	1.813	0.636	0.675	0.422	3.204	1.293	0.204	1.292	11.644	7.012	2.061	0.666	1.133	0.274	1.624	0.942	0.417	0.293	0.233	4.228	2.757	1	1.717	0.146	1.084	1.18	0.407	0.317
CARNMT1	ENSOARG00000012588	ENSOART00000013689.1	carnosine N-methyltransferase 1	2:61274631-61304613:1	9.973	2.967	4.593	6.033	4.764	5.753	2.671	2.841	8.047	6.92	11.251	4.757	2.025	2.686	1.439	8.472	4.117	2.268	4.115	4.966	11.651	4.049	4.832	10.985	6.111	10.044	6.717	6.205	10.053	6.985
GPN3	101104273	XM_012097785	GPN-loop GTPase 3	17:53929524-53944803:-1	0	0	0	3.242	0	2.504	0	7.234	2.242	0	3.199	0	0	0	0	0	0	0	2.519	0	2.521	0	0	4.379	4.259	0	0	0	11.651	0
ENSOARG00000010423	ENSOARG00000010423	ENSOART00000011340.1	no description available	5:93942227-93942370:1	2.272	0	0	3.408	1.313	6.748	3.086	4.209	6.82	4.093	3.434	0	2.215	2.635	0	11.463	0	8.724	11.665	0	1.606	0	3.817	2.197	0.842	7.23	0	0	2.811	2.609
MAPKBP1	ENSOARG00000020418	ENSOART00000022237.1, XM_004010470, XM_004010471, XM_012181251, XM_012181252	mitogen-activated protein kinase binding protein 1	7:34194382-34246089:1	3.493	7.408	5.863	4.637	8.642	4.334	11.351	10.97	6.964	7.39	5.059	7.197	7.426	7.203	9.824	4.72	10.147	11.666	7.235	5.217	5.164	9.605	8.912	6.438	5.312	5.795	7.909	7.063	5.368	6.331
BEND5	ENSOARG00000004077	ENSOART00000004431.1, XM_004001951, XM_012137138, XM_012137291	BEN domain containing 5	1:23014958-23048955:-1	8.165	2.816	2.122	1.529	5.039	5.814	1.759	0.738	0.702	4.101	11.667	3.613	1.431	1.527	5.43	7.34	3.465	1.324	2.572	6.071	8.811	2.99	1.786	4.288	11.333	7.286	2.455	0.966	2.147	6.466
EGR3	ENSOARG00000010199	ENSOART00000011092.1, XM_004023236	early growth response 3	2:42687608-42705351:1	0.062	6.235	1.233	0.218	0.395	1.465	11.672	2.162	0.103	0.879	0.186	9.726	1.75	0.027	0.252	0.698	2.893	0.651	0.059	0.663	1.213	6.561	3.685	0.481	0.558	0.378	4.772	2.284	0.198	0.332
AGL	ENSOARG00000017762	ENSOART00000019333.1, XM_012176989	amylo-alpha-1, 6-glucosidase, 4-alpha-glucanotransferase	1:76392317-76472656:1	9.615	4.12	3.725	7.122	3.937	9.705	4.536	4.08	8.453	5.858	11.146	5.729	4.355	8.007	4.603	7.863	5.446	5.816	11.681	4.615	11.472	4.537	4.013	9.912	6.669	11.226	3.931	2.83	6.858	6.684
CDK10	ENSOARG00000014334	ENSOART00000015614.1, XM_004014960	cyclin-dependent kinase 10	14:14095850-14103382:1	8.168	5.707	4.58	5.794	7.545	10.064	6.065	6.362	11.439	10.51	9.073	5.983	3.826	4.764	5.065	9.24	7.392	6.344	7.778	7.522	8.077	7.51	6.38	9.687	7.856	11.685	7.869	6.067	7.24	7.696
FBXW12	101120280	XM_012100364	F-box and WD repeat domain containing 12	19:51426704-51435285:-1	6.999	5.604	5.71	4.117	6.316	7.177	5.197	3.452	3.346	7.202	10.799	8.418	6.876	4.653	11.191	5.679	5.289	2.825	3.383	6.571	8.103	10.953	7.716	7.58	11.689	7.179	6.893	4.669	3.315	8.738
ACRC	101101959	XM_012106895, XM_012106896, XM_012106897, XM_012106898	acidic repeat containing	X:60839370-60858585:1	5.957	4.629	1.948	2.674	1.862	11.69	4.207	3.401	1.939	3.321	5.229	3.424	3.288	1.932	0.839	6.88	6.413	4.415	2.928	3.715	4.876	2.411	2.906	2.155	3.48	4.488	3.082	3.203	2.041	3.149
PDS5B	ENSOARG00000010917	ENSOART00000011883.1, XM_004012133, XM_012184590, XM_012184591, XM_012184592, XM_012184593	PDS5 cohesin associated factor B	10:28570075-28687659:-1	11.128	4.219	3.232	4.862	6.271	9.739	3.918	3.913	5.863	11.073	11.69	5.485	2.821	5.374	5.417	7.158	4.444	3.008	6.041	6.992	8.951	4.887	4.458	6.735	7.614	10.397	5.206	4.227	5.692	10.157
REV3L	ENSOARG00000009822	ENSOART00000010685.1, XM_004011199, XM_012182593, XM_012182594, XM_012182595	REV3-like, polymerase (DNA directed), zeta, catalytic subunit	8:26097854-26221354:1	11.698	2.641	1.776	3.039	2.187	8.834	2.633	2.041	4.782	5.348	10.895	3.734	1.796	2.927	1.942	7.588	4.859	4.107	8.536	4.351	8.274	2.784	2.673	6.197	4.587	8.533	2.547	2.088	3.8	4.546
COG5	ENSOARG00000005317	ENSOART00000005805.1, XM_012176709, XM_012176710	component of oligomeric golgi complex 5	4:48325486-48434634:-1	10.398	5.96	2.97	4.147	5.703	11.701	4.936	2.838	5.99	9.511	10.826	6.269	2.86	3.922	3.691	9.453	6.469	5.048	7.358	7.241	10.951	6.767	4.715	7.515	7.948	10.944	7.346	4.241	5.613	7.941
RAD54L	ENSOARG00000002264	ENSOART00000002453.1, XM_004001932, XM_012129983, XM_012130124, XM_012130199, XM_012130264	RAD54-like (S. cerevisiae)	1:20626066-20644933:1	7.374	8.858	5.146	3.414	6.665	7.621	8.981	5.489	3.337	11.706	10.839	11.209	5.921	3.991	4.163	6.362	6.019	4.983	3.638	9.139	8.23	8.957	7.746	4.727	11.112	8.907	10.294	6.291	3.893	11.077
UNC5B	ENSOARG00000006382	ENSOART00000006944.1, XM_012105619	unc-5 homolog B (C. elegans)	25:27259662-27284933:1	5.664	11.389	11.706	3.864	7.042	1.943	10.123	8.31	2.376	10.245	2.689	9.881	8.866	2.753	9.062	1.777	4.614	3.9	1.306	5.308	1.168	3.644	3.783	1.144	2.914	1.373	3.703	3.02	0.54	3.618
ENSOARG00000006072	ENSOARG00000006072	ENSOART00000006601.1	no description available	6:79312546-79313735:-1	4.135	5.771	6.166	3.037	8.37	3.467	5.645	6.032	3.967	8.647	4.699	6.791	5.616	2.71	6.569	3.63	4.88	5.649	2.388	7.578	4.851	6.491	8.565	4.874	7.902	5.653	9.789	11.101	6.075	11.714
C1orf198	ENSOARG00000003178	ENSOART00000003449.1	chromosome 1 open reading frame 198	25:3591204-3617266:-1	8.846	6.84	4.749	5.497	5.891	10.571	5.726	5.288	8.399	9.363	9.477	5.428	2.735	4.926	5.245	10.215	7.055	6.583	7.83	6.278	9.731	7.436	6.031	7.071	6.323	11.72	6.787	4.824	7.533	6.555
ENSOARG00000003363	ENSOARG00000003363	ENSOART00000003646.1	no description available	7:97934898-98128215:-1	10.968	7.521	5.778	3.443	7.304	8.914	8.61	4.315	4.073	11.723	10.161	8.123	2.851	3.318	7.848	5.601	5.86	4.33	3.827	5.41	7.074	5.779	4.521	4.486	5.748	5.67	4.519	3.229	2.288	4.781
CHST10	ENSOARG00000013318	ENSOART00000014483.1, XM_012173773	carbohydrate sulfotransferase 10	3:100863468-100885126:1	6.446	6.125	6.328	6.259	6.456	5.999	7.53	11.732	11.579	9.371	10.896	9.164	8.826	8.389	7.047	5.897	5.916	7.962	8.876	7.775	7.691	9.034	8.636	9.027	7.454	10.581	10.721	11.454	8.664	9.406
LOC101116026	101116026	XM_012111867, XM_012111874, XM_012111883, XM_012111887, XM_012111892, XM_012111904	protein CutA homolog	2:2649616-2665527:-1	6.089	7.176	8.75	8.169	4.033	6.898	6.945	6.96	9.415	5.093	8.986	8.264	6.008	11.732	3.537	7.318	8.037	7.548	9.589	5.435	7	5.811	6.507	8.078	5.366	7.386	5.359	3.89	8.377	4.549
SOLD1	ENSOARG00000011708	ENSOART00000012732.1, NM_001174112	secreted protein of Ly-6 domain 1	21:28322382-28329268:1	1.689	5	2.277	0.429	3.719	2.969	5.575	5.392	3.32	2.682	1.347	3.601	2.489	1.068	0.762	2.883	5.524	6.368	3.846	4.622	4.594	5.976	3.983	3.359	5.61	3.681	10.674	11.736	2.881	5.121
ENSOARG00000011557	ENSOARG00000011557	ENSOART00000012568.1	no description available	3:210992865-210996123:-1	8.359	8.579	6.835	6.16	9.782	9.179	9.419	6.433	4.928	11.737	11.732	9.826	6.518	6.246	7.898	8.793	5.266	8.967	7.163	8.159	9.183	9.814	9.322	6.778	8.396	8.797	9.112	6.104	5.614	10.587
TMEM218	ENSOARG00000011312	ENSOART00000012299.1, XM_004019512, XM_012101853, XM_012101854, XM_012101855, XM_012101856	transmembrane protein 218	21:27756642-27771851:-1	6.947	3.544	1.465	2.352	7.993	8.462	4.042	4.256	6.86	8.259	7.276	2.71	0.695	2.265	4.89	9.011	9.135	3.528	6.407	8.369	11.743	6.839	3.201	9.911	11.365	8.074	4.931	3.075	5.523	10.005
ZNF384	101111704	XM_004023275	zinc finger protein 384	3:207702524-207721771:1	5.287	8.418	7.833	5.263	10.149	5.249	7.331	8.548	5.734	11.745	8.25	7.123	8.129	6.095	8.356	5.625	5.924	7.822	3.931	6.462	6.29	7.915	7.749	5.732	7.965	5.293	7.353	7.543	4.418	9.041
LOC101119869	101119869	XM_004003340	60S ribosomal protein L7-like 1	1:255247467-255248839:-1	0.612	0	0.188	0.46	0.085	8.209	4.358	6.771	11.747	5.517	7.407	3.872	3.071	5.333	3.22	6.899	4.814	5.26	7.128	4.846	8.719	6.941	7.83	11.084	5.605	8.741	5.568	6.482	9.492	5.574
CNOT4	ENSOARG00000008803	ENSOART00000009587.1, XM_004008085, XM_004008086, XM_012177185, XM_012177186, XM_012177187	CCR4-NOT transcription complex, subunit 4	4:98971131-99038909:-1	6.426	7.098	7.271	5.85	6.268	6.931	8.859	11.751	7.713	7.551	7.263	7.64	11.514	7.33	5.919	6.391	7.937	10.175	7.819	5.537	7.11	8.65	8.766	7.034	6.623	6.89	8.657	8.583	7.162	5.948
ARMCX5	101122765	XM_012107842	armadillo repeat containing, X-linked 5	X:126413678-126437814:1	7.581	3.488	4.705	9.375	4.247	6.016	4.389	7.891	11.752	4.659	5.742	4.351	5.334	8.518	3.871	5.56	5.263	6.818	10.68	4.339	7.026	5.328	5.951	9.05	4.391	6.141	4.514	5.804	9.064	4.62
MECR	ENSOARG00000002344	ENSOART00000002539.1, XM_012150250, XM_012150259, XM_012150272	mitochondrial trans-2-enoyl-CoA reductase	2:237205067-237241350:1	5.903	6.218	7.288	5.296	5.444	7.926	9.73	11.143	11.76	8.127	7.742	7.217	6.313	4.511	2.775	7.008	9.064	7.788	6.145	7.718	8.293	7.963	10.514	9.266	7.854	9.771	11.255	9.792	8.677	9.797
ANKRD33	ENSOARG00000017253	ENSOART00000018778.1, XM_004006336, XM_012174235, XM_012174236, XM_012174237, XM_012174238, XM_012174239, XM_012174241, XM_012174242, XM_012174243, XM_012174244, XM_012174245, XM_012174246, XM_012174247, XM_012174248, XM_012174249	ankyrin repeat domain 33	3:134253497-134257681:-1	3.591	3.891	3.238	4.304	2.23	5.155	8.939	11.761	10.549	2.607	3.571	3.314	3.322	6.182	2.259	5.123	6.093	6.859	8.848	2.974	4.945	3.989	4.073	4.847	2.064	4.541	3.134	3.466	5.21	1.976
IDNK	ENSOARG00000009024	ENSOART00000009831.1, XM_012117705, XM_012117712, XM_012117721, XM_012117730, XM_012117740, XM_012117750, XM_012117760	idnK, gluconokinase homolog (E. coli)	2:35920817-35938499:-1	11.336	8.948	7.72	6.473	6.649	11.768	10.419	10.046	9.528	9.228	10.081	8.135	5.161	5.619	4.257	8.624	5.371	6.465	6.987	5.76	8.685	5.787	8.424	6.482	7.434	9.949	8.785	6.525	6.525	9.476
SUMO2	101121694	XM_012186552	small ubiquitin-like modifier 2	11:55287521-55295587:1	4.344	0.505	1.101	5.447	0.953	5.759	0.551	5.259	6.515	0	8.774	0	2.273	5.265	0.958	11.77	2.031	2.408	10.713	3.31	6.175	0.703	3.808	7.865	1.27	8.621	1.043	3.992	5.362	3.412
GTF3C2	ENSOARG00000019264	ENSOART00000020978.1, XM_012166698, XM_012166708	general transcription factor IIIC, polypeptide 2, beta 110kDa	3:34277438-34297183:-1	9.992	7.539	6.512	6.15	7.578	9.172	6.585	7.2	6.449	11.433	11.771	7.432	5.664	6.419	4.7	7.609	6.301	5.908	5.784	7.364	8.694	8.438	7.67	7.376	9.138	9.865	6.9	6.981	6.611	9.641
HYAL2	ENSOARG00000009614	ENSOART00000010462.1, NM_001009754	hyaluronoglucosaminidase 2	19:49974131-49976758:1	6.801	4.658	2.827	3.957	3.892	11.772	5.706	2.948	4.895	7.579	7.077	4.355	1.209	2.294	1.643	10.17	6.12	2.335	5.505	4.871	10.544	6.613	6.304	7.381	5.343	9.212	3.925	4.667	5.545	5.384
LOC101106719	101106719	XM_012100060	laminin subunit beta-2	19:50828743-50841182:1	2.86	7.494	4.086	1.253	5.654	4.453	11.776	6.886	2.177	10.273	2.874	5.522	3.084	1.235	2.496	1.911	3.451	2.969	1.088	3.143	2.64	5.219	2.989	1.223	3.274	2.348	5.229	2.779	1.054	4.707
BRF1	ENSOARG00000008460	ENSOART00000009207.1, XM_012099211	BRF1, RNA polymerase III transcription initiation factor 90 kDa subunit	18:68249327-68282930:-1	7.152	6.388	5.03	3.99	5.376	6.482	7.184	5.549	5.168	11.777	9.195	7.412	3.664	3.401	6.607	5.664	4.961	4.2	5.074	6.035	6.226	5.929	5.843	5.389	6.108	7.175	5.705	4.01	3.852	8.924
TTC39B	ENSOARG00000013963	ENSOART00000015210.1	tetratricopeptide repeat domain 39B	2:83116836-83265347:-1	7.909	3.718	3.435	8.037	5.408	4.883	2.095	3.737	6.614	3.327	6.852	3.154	5.503	11.781	6.418	5.148	3.353	3.396	6.863	3.451	6.381	3.368	3.748	6.67	4.461	6.391	3.492	2.944	4.812	3.894
DMAP1	ENSOARG00000000801	ENSOART00000000860.1	DNA methyltransferase 1 associated protein 1	1:18635016-18644206:1	8.955	4.561	4.945	6.206	7.943	9.196	6.105	7.367	9.365	10.093	10.511	5.065	4.94	7.637	5.88	7.745	5.905	7.843	8.516	6.696	10.233	5.775	7.365	9.004	8.71	11.785	6.827	7.41	9.008	9.648
XPNPEP3	ENSOARG00000017792	ENSOART00000019362.1, XM_012175689, XM_012175690, XM_012175691, XM_012175692, XM_012175693	X-prolyl aminopeptidase 3, mitochondrial	3:216133095-216160440:1	9.952	6.333	4.431	4.659	5.179	9.372	5.962	6.292	7.732	8.236	8.306	4.561	3.139	4.559	2.647	9.813	8.051	6.326	8.246	6.906	11.786	8.524	6.758	8.481	10.058	11.146	6.432	5.808	7.959	7.221
FAM160B2	ENSOARG00000010513	ENSOART00000011447.1, XM_012119684	family with sequence similarity 160, member B2	2:43247711-43259882:-1	6.075	7.403	5.572	4.077	10.705	6.177	7.562	6.46	4.782	11.792	7.171	6.684	4.162	4.464	10.22	5.914	7.854	7.805	5.574	10.922	6.385	9.038	9.844	6.371	11.766	5.806	8.536	6.52	3.959	9.429
LOC101118972	101118972	XM_012187982	transcription initiation factor TFIID subunit 9-like	12:56864943-56865764:1	8.335	7.239	7.385	8.69	7.658	6.533	6.688	10.652	11.428	7.954	7.362	7.678	8.222	6.502	3.505	5.934	6.965	6.486	8.96	4.501	7.589	8.177	11.794	10.618	8.026	7.776	8.103	7.808	9.231	6.127
RUBCN	ENSOARG00000020282	ENSOART00000022086.1	rubicon autophagy regulator	1:188653042-188702661:1	6.547	2.165	3.299	4.601	8.433	8.631	1.584	3.863	3.551	10.23	8.628	1.886	2.576	3.797	3.884	11.794	4.378	2.471	5.133	6.632	6.593	2.55	4.953	4.737	5.786	7.924	2.199	2.821	3.518	6.365
SMARCAD1	ENSOARG00000017851	ENSOART00000019426.1, XM_004009702, XM_012179672	SWI/SNF-related, matrix-associated actin-dependent regulator of chromatin, subfamily a, containing DEAD/H box 1	6:30312723-30342407:-1	8.521	2.421	2.09	4.844	4.155	9.104	2.892	4.059	8.329	8.888	11.794	2.951	1.596	5.303	3.88	7.128	2.307	2.918	6.669	5.066	9.852	3.511	4.555	8.066	6.117	9.533	2.806	2.456	6.722	7.453
HAGHL	ENSOARG00000013741	ENSOART00000014954.1, ENSOART00000014955.1, XM_004020702, XM_012103931, XM_012103932, XM_012103933, XM_012103934	hydroxyacylglutathione hydrolase-like	24:573253-576097:1	10.99	8.635	6.337	5.994	6.736	10.574	8.342	5.538	6.162	9.003	11.808	7.949	5.029	4.88	3.847	9.741	4.936	5.424	5.849	6.597	9.026	7.385	4.859	6.153	6.838	9.324	6.455	3.805	5.64	6.924
ZZEF1	ENSOARG00000018345	ENSOART00000019978.1, XM_012185517	zinc finger, ZZ-type with EF-hand domain 1	11:24225506-24311896:-1	9.214	6.03	5.467	5.31	8.137	6.781	6.272	7.005	5.507	11.809	9.518	7.182	5.344	5.254	6.959	6.174	7.085	6.278	5.373	6.597	5.758	5.849	5.92	5.343	6.658	6.182	5.939	4.762	3.893	8.123
ERI2	ENSOARG00000013256	ENSOART00000014415.1, ENSOART00000014416.1, XM_004020819, XM_012104206	ERI1 exoribonuclease family member 2	24:18525811-18540834:-1	8.032	3.193	3.457	5.757	2.654	7.386	3.66	4.397	8.077	5.086	9.975	2.526	2.813	7.686	2.273	5.979	2.646	2.602	5.366	4.602	9.555	4.569	5.903	9.015	5.729	11.829	3.75	4.272	8.669	5.882
ENSOARG00000010343	ENSOARG00000010343	ENSOART00000011269.1, ENSOART00000011273.1	no description available	18:13210525-13320132:-1	11.837	6.046	8.529	8.497	7.656	11.333	6.168	6.202	5.829	9.136	11.247	7.119	9.378	7.565	6.728	9.284	8.465	8.502	7.787	8.127	10.167	5.484	5.065	5.579	6.09	9.714	7.247	7.632	6.883	7.581
ZNF3	ENSOARG00000017937	ENSOART00000019520.1, XM_012104560, XM_012104561	zinc finger protein 3	24:36286140-36294900:1	7.911	5.394	6.232	7.71	5.414	7.312	5.984	8.024	11.838	6.734	8.119	4.276	5.515	8.949	4.52	6.169	5.425	6.052	9.138	4.884	7.729	6.078	7.087	8.327	6.563	8.281	4.442	7.435	8.919	6.324
ENSOARG00000005045	ENSOARG00000005045	ENSOART00000005492.1, ENSOART00000005495.1	no description available	24:4124746-4135515:-1	7.149	6.442	5.249	4.624	5.152	11.08	8.697	6.837	8.216	11.839	8.424	7.697	4.794	3.377	3.823	6.469	6.573	5.346	4.225	7.313	7.35	6.042	6.095	5.211	6.166	9.399	8.272	5.096	5.555	8.404
CASP2	ENSOARG00000017720	ENSOART00000019286.1, XM_012177298, XM_012177299	caspase 2, apoptosis-related cysteine peptidase	4:106113885-106131954:1	5.604	3.785	3.363	3.413	8.359	6.135	4.781	6.812	5.338	11.85	7.685	5.068	2.608	3.247	7.856	5.193	4.561	5.204	5.082	8.544	5.105	4.756	6.647	4.127	7.972	6.763	6.344	7.098	4.584	8.978
EXOSC7	ENSOARG00000011298	ENSOART00000012284.1, XM_004018523	exosome component 7	19:54075629-54104398:-1	9.64	6.478	6.167	8.289	4.984	9.35	6.435	7.607	11.85	9.357	9.334	5.244	5.306	5.172	2.451	6.772	5.216	5.437	7.406	6.62	6.902	6.242	6.767	8.897	6.793	8.689	5.735	5.67	8.164	6.635
WDR19	ENSOARG00000010723	ENSOART00000011677.1, XM_004009772, XM_012179809, XM_012179810, XM_012179811	WD repeat domain 19	6:58339674-58407562:1	7.409	3.889	1.597	1.77	2.913	10.447	3.843	2.774	3.116	5.51	6.347	3.67	1.506	2.397	2.228	10.342	5.827	3.478	4.873	4.206	11.853	5.778	3.299	4.085	4.36	10.778	6.08	3.586	3.474	5.938
ENSOARG00000002135	ENSOARG00000002135	ENSOART00000002297.1	no description available	JH923341.1:8540-10801:1	7.636	8.586	5.191	9.39	8.449	8.58	5.44	5.501	5.927	5.381	7.492	4.306	2.179	2.479	11.861	8.878	2.192	2.498	2.736	2.839	4.799	3.254	3.317	3.518	2.257	8.204	7.026	6.704	6.322	2.947
ENSOARG00000003544	ENSOARG00000003544	ENSOART00000003848.1	no description available	14:35810990-35817094:-1	10.943	4.755	4.835	6.12	8.435	10.716	6.234	8.515	9.44	11.474	11.868	3.831	3.013	6.849	5.735	10.37	6.197	8.261	9.763	9.15	11.385	7.503	6.994	9.523	10.143	10.538	5.649	5.709	7.856	9.216
PIGQ	ENSOARG00000012399	ENSOART00000013483.1, XM_012104697	phosphatidylinositol glycan anchor biosynthesis, class Q	24:428124-442778:1	9.677	9.265	7.103	5.482	7.118	8.309	8.604	6.693	6.223	11.395	9.636	8.877	4.853	3.543	4.857	7.571	7.901	7.231	6.818	9.199	10.164	11.091	10.516	7.086	9.975	9.373	11.869	7.277	6.183	9.67
RALGAPA1	ENSOARG00000007701	ENSOART00000008387.1, ENSOART00000008389.1, XM_004017895, XM_012098809, XM_012098810, XM_012098811, XM_012098812, XM_012098813, XM_012098814, XM_012098815, XM_012098816, XM_012098817, XM_012098818, XM_012098819, XM_012098820, XM_012098821, XM_012098822	Ral GTPase activating protein, alpha subunit 1 (catalytic)	18:44699483-44872892:-1	10.252	3.313	2.576	6.918	5.687	9.62	3.297	3.692	9.1	7.171	10.604	3.876	2.421	5.72	4.989	8.615	4.296	4.887	9.934	5.083	11.673	4.714	4.538	9.83	5.676	11.871	4.06	3.635	8.837	6.412
SH3GLB2	ENSOARG00000008873	ENSOART00000009663.1, ENSOART00000009664.1, XM_012161539	SH3-domain GRB2-like endophilin B2	3:7369742-7384714:1	11.871	8.967	6.168	6.625	10.209	7.597	9.175	6.446	4.768	10.664	8.551	7.628	5.203	3.087	5.76	8.874	7.719	8.09	6.653	11.804	9.539	11.299	9.414	7.193	9.968	8.83	11.465	6.052	5.404	9.582
SNAP47	ENSOARG00000006875	ENSOART00000007469.1, XM_004008398, XM_012177652, XM_012177653	synaptosomal-associated protein, 47kDa	5:3134310-3189150:-1	7.305	7.69	8.726	8.353	7.5	7.729	8.378	11.873	10.456	7.192	8	5.871	8.227	8.889	6.53	9.507	7.886	10.628	10.89	7.6	8.096	8.642	9.449	9.884	6.158	8.459	6.489	9.455	8.323	7.586
CREBRF	ENSOARG00000004089	ENSOART00000004444.1, XM_004016872, XM_012096729, XM_012096730	CREB3 regulatory factor	16:4838440-4872394:1	10.128	1.399	1.375	3.312	2.349	11.875	1.74	1.363	3.292	3.234	7.903	1.4	1.71	5.338	3.487	11.834	2.428	2.406	6.372	3.151	6	2.08	1.151	4.566	3.239	5.932	1.096	1.516	2.899	2.5
UIMC1	101119468	XM_004008706, XM_012178267, XM_012178268, XM_012178269, XM_012178270, XM_012178271, XM_012178273, XM_012178274	ubiquitin interaction motif containing 1	5:35847391-35916629:-1	9.315	3.335	2.484	4.458	4.458	8.53	3.265	4.743	7.116	7.322	9.088	4.151	2.027	3.918	3.342	7.084	6.276	7.481	9.593	6.979	8.073	5.501	9.285	11.875	8.109	9.163	4.874	5.174	9.883	4.726
ASB6	ENSOARG00000008733	ENSOART00000009515.1, XM_012161346	ankyrin repeat and SOCS box containing 6	3:6836033-6840652:1	8.19	10.044	9.114	8.303	9.824	9.868	10.869	11.098	10.677	11.877	10.214	8.298	6.835	9.163	8.932	8.625	9.048	9.632	10.023	8.496	9.548	10.23	11.723	9.844	7.605	10.341	9.359	8.467	9.084	8.458
TTLL4	ENSOARG00000019690	ENSOART00000021443.1, ENSOART00000021445.1, XM_004004934	tubulin tyrosine ligase-like family member 4	2:219674007-219692447:1	7.382	8.776	7.164	6.042	7.561	5.281	7.4	10.371	6.406	10.129	7.438	7.229	6.991	6.574	6.225	5.722	7.451	7.803	6.991	8.319	7.94	10.588	11.877	8.549	11.299	8.698	7.495	7.576	5.589	9.198
ZNF184	ENSOARG00000018426	ENSOART00000020051.1	zinc finger protein 184	20:30152364-30170695:1	10.594	2.33	3.388	4.795	3.269	10.212	2.322	4.226	8.236	6.784	10.247	2.778	2.501	5.562	2.657	9.071	3.127	2.795	7.707	5.692	11.878	3.675	4.501	8.608	6.219	10.972	2.904	3.581	6.641	6.782
RAB42	ENSOARG00000019832	ENSOART00000021592.1	RAB42, member RAS oncogene family	2:237721084-237721509:-1	4.315	0.958	0.145	0.372	2.168	11.879	1.045	0.51	1.186	8.35	4.844	0.344	0	0.513	0.768	7.26	2.141	0.99	1.777	2.764	4.097	0.579	0.866	2.306	3.628	4.944	1.38	0.638	0.68	4.575
ENSOARG00000003710	ENSOARG00000003710	ENSOART00000004029.1	no description available	14:61856321-61901449:1	11.884	5.949	6.137	6.028	7.045	6.511	2.884	4.742	5.487	6.296	11.348	4.576	4.278	5.824	5.341	4.893	3.106	4.176	6.651	5.048	8.721	4.17	5.4	6.44	4.567	4.265	2.517	3.842	5.118	4.036
NCKAP1	ENSOARG00000016751	ENSOART00000018245.1, XM_004005359, XM_012131800	NCK-associated protein 1	2:125590212-125688989:1	4.663	2.394	2.679	4.19	5.171	4.983	2.373	3.387	5.794	3.581	4.14	1.873	1.732	3.332	5.053	6.613	4.05	1.857	3.345	3.109	11.887	6.083	6.075	9.909	4.046	5.119	3.835	3.241	4.434	1.966
LOC101116750	101116750	XM_012187917	plasma membrane calcium-transporting ATPase 4-like	12:5621556-5819313:1	5.324	5.925	3.429	5.738	5.012	6.882	8.844	9.042	9.852	4.311	6.805	4.561	5.312	8.492	5.571	6.599	9.204	10.246	11.889	4.474	8.728	7.51	3.712	3.577	3.387	7.865	6.378	3.847	3.9	5.149
CLCN3	ENSOARG00000015494	ENSOART00000016857.1, ENSOART00000016858.1, XM_004005343	chloride channel, voltage-sensitive 3	2:110278446-110333394:-1	5.767	5.389	3.882	3.877	8.122	4.882	6.641	6.23	5.674	11.89	6.861	6.781	3.546	3.807	8.451	4.412	5.504	5.342	4.769	6.932	5.952	6.767	6.89	7.025	7.894	5.704	6.469	4.909	4.524	8.524
HHLA3	105614660	XM_012173595	HERV-H LTR-associating 3	1:45757632-45758836:1	8.995	5.289	3.384	6.014	7.372	10.315	5.265	7.238	11.891	10.756	8.837	6.248	3.922	7.697	5.763	8.157	4.048	5.477	8.814	6.749	7.803	5.617	6.586	6.932	4.491	8.991	5.736	4.719	7.565	5.325
RNF25	ENSOARG00000019664	ENSOART00000021415.1, XM_012146281	ring finger protein 25	2:219612519-219620688:-1	8.499	7.996	7.647	6.258	8.011	7.862	7.107	11.865	10.754	11.894	9.584	6.208	7.059	7.495	7.103	8.2	7.584	11.154	9.907	10.255	9.125	9.326	11.089	9.617	9.728	9.694	7.667	9.283	9.035	8.798
ZNF609	ENSOARG00000020735	ENSOART00000022589.1, XM_012181355, XM_012181356, XM_012181357	zinc finger protein 609	7:42468686-42651592:-1	3.812	5.171	4.096	2.879	8.441	5.481	6.517	5.735	3.154	11.898	5.978	6.935	4.119	3.286	8.103	5.043	6.085	6.31	4.092	8.757	4.672	6.404	6.367	4.311	9.57	5.174	6.325	4.934	2.706	10.203
LOC101122720	101122720	XM_012095098	uncharacterized LOC101122720	14:53130481-53132492:1	5.797	7.198	7.919	5.491	11.911	5.181	7.09	8.613	5.225	10.645	6.936	6.701	6.169	5.412	8.536	4.863	5.888	6.311	4.15	7.548	5.894	10.115	11.844	8.612	9.267	6.164	7.684	10.595	4.915	11.202
SLC39A11	101114288	XM_004013145	solute carrier family 39, member 11	11:57107194-57386635:1	8.832	9.125	5.805	6.043	8.394	8.284	7.503	5.307	6.323	8.332	9.286	7.932	3.889	3.895	4.318	7.62	5.677	6.374	5.575	7.768	8.029	9.89	9.302	7.346	7.515	11.912	8.603	5.85	6.08	9.873
DCLK2	ENSOARG00000006787	ENSOART00000007384.1, XM_012098133	doublecortin-like kinase 2	17:7381782-7579818:-1	10.238	8.909	5.354	4.157	3.602	11.916	8.402	4.569	4.869	10.461	7.648	6.261	3.12	1.903	2.009	6.441	3.571	1.804	1.693	3.927	9.025	7.276	4.634	3.496	6.002	4.45	4.049	1.95	1.938	5.131
ZNF189	ENSOARG00000007528	ENSOART00000008193.1, XM_004004045, XM_012114979, XM_012114986, XM_012114992	zinc finger protein 189	2:21634205-21640804:-1	11.922	5.875	5.926	7.686	5.266	9.717	6.686	7.134	9.727	6.221	9.909	5.332	4.751	7.128	3.419	7.217	5.823	5.591	8.149	4.114	9.117	6.396	6.561	8.94	5.963	10.104	6.075	8.032	11.111	6.385
APBB2	ENSOARG00000013063	ENSOART00000014198.1, XM_004009786, XM_004009788, XM_012179848, XM_012179849, XM_012179850, XM_012179851, XM_012179852, XM_012179853, XM_012179854, XM_012179856, XM_012179857, XM_012179859, XM_012179860, XM_012179861, XM_012179862, XM_012179863, XM_012179864, XM_012179865, XM_012179866	amyloid beta (A4) precursor protein-binding, family B, member 2	6:59669046-59692371:-1	5.193	5.313	8.824	11.925	6.963	4.231	3.042	4.467	6.616	5.726	7.016	4.484	4.635	9.163	5.831	3.845	3.157	7.118	11	6.575	4.903	4.137	8.871	10.771	5.036	6.053	4.159	8.441	9.437	5.079
TMUB2	ENSOARG00000007331	ENSOART00000007974.1, XM_004013410	transmembrane and ubiquitin-like domain containing 2	11:43425667-43429533:1	7.678	7.211	5.816	6.76	5.882	9.553	7.692	7.358	10.098	8.397	10.052	5.769	5.02	10.579	7.247	8.649	9.079	10.083	11.927	7.398	8.455	7.276	7.446	9.124	7.28	8.403	6.436	6.008	8.029	6.549
TEX10	101121747	XM_004004219	testis expressed 10	2:47257486-47305680:1	9.089	4.381	3.426	7.063	3.136	7.357	3.088	3.887	7.272	4.24	11.928	4.363	3.92	6.745	1.919	7.237	3.707	2.417	4.862	2.469	6.764	3.087	4.413	6.91	3.08	9.826	2.76	4.714	8.632	5.984
EXOSC5	ENSOARG00000007412	ENSOART00000008066.1	exosome component 5	14:49626678-49635452:1	7.583	6.249	5.937	4.553	6.98	6.961	6.216	7.174	11.513	9.108	8.185	5.174	2.566	2.842	4.084	9.397	5.727	4.603	6.362	8.825	7.779	7.138	10.729	8.814	7.243	11.932	8.893	7.078	10.783	9.225
MAP2K5	ENSOARG00000018353	ENSOART00000019979.1, XM_004010260, XM_012180833, XM_012180834	mitogen-activated protein kinase kinase 5	7:14159483-14424247:1	9.253	8.145	5.594	4.362	8.826	7.425	7.716	5.724	3.884	11.937	8.815	9.57	4.166	3.001	5.265	7.031	8.521	7.091	4.961	10.401	7.284	9.114	6.571	5.734	10.105	9.723	10.8	6.699	5.105	11.511
ENSOARG00000004518	ENSOARG00000004518	ENSOART00000004916.1	no description available	14:44106523-44124766:1	8.131	5.821	7.887	7.178	6.915	8.226	7.192	11.942	10.237	8.87	8.863	5.765	4.053	4.3	3.313	7.145	5.668	5.939	5.576	4.961	8.558	8.2	10.362	8.134	6.986	7.166	5.064	7.306	7.413	5.749
NIT1	ENSOARG00000009521	ENSOART00000010368.1, XM_004002683, XM_012184743, XM_012184750	nitrilase 1	1:110673916-110676999:1	8.01	6.058	4.448	5.811	5.401	9.413	7.125	5.155	6.542	6.746	7.943	5.58	4.43	5.517	4.066	8.634	7.598	6.932	7.656	7.325	11.943	8.582	7.866	9.02	11.019	8.614	6.767	5.203	6.136	7.69
KCNG2	ENSOARG00000004123	ENSOART00000004483.1, XM_012103852	potassium channel, voltage gated modifier subfamily G, member 2	23:557443-585775:-1	7.714	6.682	4.205	4.379	6.685	10.207	7.918	5.96	5.052	8.427	8.879	5.782	3.603	5.33	6.522	11.944	11.235	8.201	9.008	9.693	8.562	7.451	6.723	7.218	6.787	8.453	8.139	5.431	4.922	8.085
LOC101114497	101114497	XM_012107030, XM_012107031	GRB2-associated-binding protein 3	X:75294864-75303094:-1	5.062	3.971	2.042	2.663	3.55	11.946	5.147	2.085	3.788	6.284	5.907	3.051	0	1.64	3.076	9.427	4.606	3.262	4.974	4.993	7.724	3.362	2.289	4.118	4.878	8.539	3.951	2.371	3.293	5.632
CLYBL	ENSOARG00000004348	ENSOART00000004735.1, XM_012184906, XM_012184907, XM_012184909, XM_012184910, XM_012184911	citrate lyase beta like	10:75930215-75995430:1	6.911	5.443	4.818	2.891	3.427	7.58	5.405	4.404	3.876	6.135	5.696	4.355	3.844	2.3	1.957	8.05	6.887	5.17	5.343	5.808	11.952	9.036	7.361	7.601	8.648	8.994	6.494	6.068	4.717	7.138
TCTN1	ENSOARG00000017176	ENSOART00000018697.1, XM_004017366, XM_012097788, XM_012097789, XM_012097790, XM_012097791, XM_012097792, XM_012097793, XM_012097794	tectonic family member 1	17:54061441-54092376:1	7.602	4.357	4.055	4.718	5.045	8.56	6.474	6.715	6.855	8.061	8.38	6.405	4.984	5.417	4.297	9.34	7.69	8.312	9.924	9.744	11.953	10.057	9.308	9.487	11.144	9.6	8.757	7.718	7.844	8.747
ZNF814	105602040	XM_012094904	zinc finger protein 814	14:62273291-62287613:1	10.925	2.514	2.816	5.554	2.494	9.075	2.805	2.019	7.681	2.799	11.956	2.728	2.178	7.002	2.885	7.484	3.295	2.638	7.405	3.828	9.375	2.933	2.996	6.931	3.819	10.13	2.088	2.432	6.18	4.402
NCR3	ENSOARG00000008079	ENSOART00000008792.1, XM_012100951, XM_012100952, XM_012100953, XM_012100954, XM_012100955, XM_012100956, XM_012100957, XM_012100958, XM_012100959	natural cytotoxicity triggering receptor 3	20:26840185-26844379:1	3.473	1.876	3.638	6.997	11.957	1.906	0.81	1.42	2.05	2.32	3.615	1.347	3.733	4.023	7.304	3.041	2.319	2.239	3.417	4.117	4.044	2.516	4.972	5.854	7.484	3.273	1.668	4.312	4.642	3.444
RARS2	ENSOARG00000013003	ENSOART00000014143.1, XM_004011287, XM_012182797, XM_012182798	arginyl-tRNA synthetase 2, mitochondrial	8:49495473-49555380:1	10.794	5.089	3.003	6.445	5.152	10.206	4.114	3.392	9.395	6.585	11.396	5.217	3.245	5.728	4.126	8.457	5.238	3.998	7.591	7.145	10.915	6.187	5.971	10.961	8.023	11.96	5.492	4.038	8.697	7.414
XAB2	ENSOARG00000002015	ENSOART00000002171.1, XM_004008555	XPA binding protein 2	5:14138484-14147241:-1	11.782	7.81	8.592	8.837	8.898	11.66	9.26	9.862	11.964	10.112	11.407	7.157	7.536	9.041	6.435	10.727	8.842	9.076	10.382	7.851	9.888	7.804	9.168	9.665	8.625	9.812	7.547	9.679	9.741	8.239
LOC101119745	101119745	XM_012189397	nuclear receptor coactivator 4-like	13:35451276-35465875:-1	11.965	3.784	3.035	3.462	1.585	10.381	4.14	3.521	4.542	4.403	11.185	5.453	2.78	2.619	1.617	11.896	7.778	5.69	6.625	4.601	7.525	4.601	3.201	4.425	4.352	6.768	3.101	2.708	3.557	3.861
SCAP	ENSOARG00000003881	ENSOART00000004231.1, XM_004018667	SREBF chaperone	19:52133900-52191198:1	7.383	8.867	8.382	5.445	7.883	4.95	7.862	6.679	4.366	11.378	8.543	11.966	7.112	4.534	5.128	3.972	4.012	4.191	2.812	7.417	5.63	8.697	7.904	5.689	8.466	6.195	8.939	6.673	4.247	9.906
CA5A	ENSOARG00000012206	ENSOART00000013278.1, XM_004014954, XM_012189655, XM_012189656, XM_012189657	carbonic anhydrase VA, mitochondrial	14:12842752-12871170:-1	0.284	0.142	0.499	0.134	0.019	1.485	6.552	8.282	11.97	1.821	0.17	0.356	0.591	0.142	0.058	3.028	4.274	4.02	4.985	2.157	3.451	5.939	7.943	8.207	1.534	1.137	1.703	1.246	1.404	1.771
TBC1D16	ENSOARG00000002538	ENSOART00000002748.1, XM_012186808	TBC1 domain family, member 16	11:51562846-51632006:1	7.756	6.754	2.898	2.422	2.877	10.376	6.001	2.256	1.193	5.448	5.461	4.983	2.014	0.902	0.608	11.97	7.308	3.133	2.389	5.139	7.411	5.497	3.417	2.348	6.337	5.268	3.924	1.983	1.793	4.451
KIAA0232	ENSOARG00000011238	ENSOART00000012220.1, XM_004010011	KIAA0232 ortholog	6:112690796-112740507:1	8.415	6.737	5.085	4.685	7.933	8.535	7.178	7.223	4.836	11.973	9.345	5.932	6.2	6.006	9.266	7.569	8.604	7.984	7.3	7.991	6.957	6.067	6.319	5.372	7.526	8.224	4.962	5.549	5.252	8.811
FRYL	ENSOARG00000017797	ENSOART00000019368.1, ENSOART00000019370.1, XM_004009819, XM_012179942, XM_012179943, XM_012179944, XM_012179945, XM_012179946, XM_012179948, XM_012179949, XM_012179950, XM_012179951, XM_012179952, XM_012179953	FRY-like	6:67157443-67337530:-1	10.391	4.216	2.769	7.792	5.976	11.229	3.818	3.442	7.541	6.801	11.976	4.52	3.744	9.042	5.297	9.838	4.56	4.508	9.486	5.225	10.984	4.187	3.718	8.359	5.472	11.353	4.184	3.265	8.461	5.846
LOC105605978	105605978	XM_012108188	tumor necrosis factor receptor superfamily member 26-like	JH923069.1:15183-23510:1	5.236	7.948	9.112	6.576	7.241	8.03	11.977	6.627	6.265	8.21	3.281	5.821	2.98	1.878	3.284	3.427	1.582	1.476	1.932	1.998	7.522	10.722	6.879	5.439	6.6	3.619	2.793	2.696	2.73	4.339
LSM11	101114109	XM_004009541, XM_012178869, XM_012178870, XM_012178871	LSM11, U7 small nuclear RNA associated	5:66648649-66660447:1	9.988	4.176	3.272	5.67	8.85	10.526	3.505	5.446	7.401	8.655	11.161	2.457	1.914	5.133	6.145	10.706	3.618	3.176	7.16	6.559	10.44	3.934	6.833	8.952	7.856	11.981	5.675	4.678	7.894	10.591
XPC	ENSOARG00000000732	ENSOART00000000785.1, XM_012100381	xeroderma pigmentosum, complementation group C	19:57878898-57902255:1	10.141	10.973	5.801	5.345	8.082	9.709	8.847	6.721	5.772	11.142	10.635	8.847	5.168	4.752	6.016	10.983	10.016	10.174	8.399	11.981	10.397	10.894	9.889	7.674	10.749	8.388	6.427	5.369	4.607	8.927
GEMIN8	ENSOARG00000011696	ENSOART00000012718.1, XM_004021914	gem (nuclear organelle) associated protein 8	X:11437795-11454980:-1	7.421	8.668	4.318	6.425	8.411	8.971	6.992	9.018	9.711	11.986	7.459	6.96	5.444	7.045	6.563	9.248	8.647	9.849	9.684	10.742	10.087	9.665	10.501	10.997	10.716	9.288	8.15	5.869	8.211	10.239
C6orf136	ENSOARG00000012271	ENSOART00000013342.1	chromosome 6 open reading frame 136	20:27415216-27418630:-1	4.364	4.571	4.101	2.422	6.786	3.82	4.713	5.414	2.993	10.362	5.49	4.959	3.168	2.974	5.869	4.643	8.5	5.002	3.009	7.814	4.617	6.394	4.513	3.488	11.987	4.196	5.984	2.701	2.511	7.411
AS3MT	ENSOARG00000002541	ENSOART00000002753.1	arsenite methyltransferase	22:22608612-22624523:1	11.268	7.272	4.066	5.176	8.056	9.652	5.664	4.257	4.94	8.871	11.837	7.777	4.23	4.09	4.99	8.6	6.496	3.926	5.531	11.988	6.625	3.732	2.692	3.858	5.812	10.748	5.573	4.254	4.005	10.572
FERMT1	ENSOARG00000018536	ENSOART00000020180.1, XM_004014352, XM_012188701, XM_012188702, XM_012188704	fermitin family member 1	13:47538788-47597332:-1	2.2	2.827	5.748	7.908	1.392	1.403	3.686	6.553	9.631	1.442	1.837	1.957	5.915	11.99	0.982	1.231	2.745	6.235	9.598	1.216	2.382	3.012	2.667	4.059	1.569	2.959	3.141	4.207	5.563	1.812
SGF29	ENSOARG00000003226	ENSOART00000003502.1	SAGA complex associated factor 29	24:26102387-26131959:1	9.213	3.724	1.432	2.237	4.842	8.36	2.511	2.173	4.79	9.674	11.99	3.354	1.165	2.649	4.867	8.783	3.922	2.456	4.701	6.379	7.727	4.155	3.916	6.244	5.953	10.759	4.526	3.132	5.037	8.773
RALGAPA2	ENSOARG00000003400	ENSOART00000003711.1, XM_012188560	Ral GTPase activating protein, alpha subunit 2 (catalytic)	13:39017028-39281715:-1	11.866	8.343	9.31	9.366	10.513	6.138	6.577	6.611	5.004	8.291	12.002	9.755	9.908	8.844	9.175	6.031	5.79	5.54	4.376	6.251	4.877	4.961	3.86	4	7.367	5.546	5.737	5.926	5.336	7.634
RNF44	ENSOARG00000002281	ENSOART00000002470.1, XM_004008700	ring finger protein 44	5:35482938-35491205:-1	1.96	5.211	2.167	0.6	6.225	2.241	6.319	2.893	1.051	12.002	2.229	7.999	2.832	0.638	4.797	1.598	5.886	3.239	1.116	7.142	2.107	7.635	4.721	1.913	8.659	1.442	5.826	2.825	0.841	8.667
IFFO1	ENSOARG00000007751	ENSOART00000008438.1, XM_012176130	intermediate filament family orphan 1	3:207804017-207817509:1	9.75	3.015	1.762	3.716	6.69	8.1	2.778	2.759	2.923	12.005	10.136	2.015	1.094	3.559	4.2	7.916	3.294	3.729	5.241	9.012	6.557	3.043	3.742	4.092	6.86	6.115	1.873	1.908	2.947	8.267
RASGRP4	ENSOARG00000005647	ENSOART00000006157.1, XM_012190371, XM_012190373	RAS guanyl releasing protein 4	14:47405532-47415892:-1	6.285	6.43	2.984	2.584	6.938	11.972	8.759	3.585	3.111	10.995	7.161	5.359	1.645	2.364	4.562	12.007	7.49	3.912	5.508	11.355	10.369	7.878	5.855	5.431	9.906	7.505	6.235	3.673	2.799	8.717
STK19	ENSOARG00000002040	ENSOART00000002201.1, XM_012100920	serine/threonine kinase 19	20:26516628-26525214:-1	8.111	8.089	5.098	5.748	9.444	11.359	8.209	8.238	8.787	9.479	10.432	5.721	4.59	7.361	8.822	9.743	11.578	12.009	9.36	8.995	11.279	8.993	9.414	8.617	9.313	10.078	8.243	8.033	7.807	9.282
ENSOARG00000009899	ENSOARG00000009899	ENSOART00000010772.1	no description available	21:25794244-25794988:-1	2.033	4.373	4.214	2.125	5.46	5.095	11.309	7.86	4.096	10.381	5.556	7.177	7.536	3.526	9.065	2.2	4.695	3.736	1.862	4.085	5.201	10.422	10.173	4.613	6.299	5.214	12.012	11.217	5.137	11.784
LOC105615164	105615164	XM_012177466	zinc finger CCCH-type antiviral protein 1-like	4:102468565-102496638:-1	3.368	3.92	5.462	5.797	3.526	3.401	4.86	8.508	7.123	3.197	4.547	2.367	9.845	8.072	3.608	4.264	4.429	12.012	8.601	3.315	4.733	3.233	6.763	6.113	3.45	4.627	2.97	5.716	6.271	4.034
SEC22A	ENSOARG00000020182	ENSOART00000021975.1, XM_004002980, XM_012095791	SEC22 vesicle trafficking protein homolog A (S. cerevisiae)	1:185844729-185936590:1	6.29	3.805	2.456	4.048	4.432	8.029	3.981	7.264	10.958	7.611	6.547	2.88	2.629	6.18	3.724	7.097	7.121	8.22	12.016	5.236	7.598	6.106	5.312	7.887	7.526	9.305	4.982	5.184	8.491	7.512
PNPO	ENSOARG00000007695	ENSOART00000008379.1	pyridoxamine 5'-phosphate oxidase	11:38069220-38075491:-1	8.643	5.126	4.521	4.205	4.244	6.499	4.752	4.093	7.075	5.998	6.965	4.107	1.595	2.614	1.654	6.354	4.548	3.573	4.764	4.069	8.683	5.984	5.699	7.858	7.42	12.018	7.947	5.617	8.094	9.023
POLQ	ENSOARG00000020009	ENSOART00000021785.1, XM_004002959, XM_012095397, XM_012095403, XM_012095411, XM_012095419, XM_012095426	polymerase (DNA directed), theta	1:184260358-184334290:-1	11.57	3.743	3.63	7.737	3.427	5.046	2.035	2.093	4.59	3.56	12.02	5.079	3.905	8.098	1.753	3.868	2.719	2.355	4.239	3.333	6.509	2.9	2.528	5.198	3.141	7.496	2.738	3.142	5.654	3.754
NKAIN1	ENSOARG00000001800	ENSOART00000001936.1, XM_012150059, XM_012150068	Na+/K+ transporting ATPase interacting 1	2:235258771-235287503:1	5.797	7.801	10.988	8.349	9.395	2.008	9.522	11.154	6.597	4.854	1.495	4.688	4.481	2.982	2.409	2.765	7.548	12.029	7.878	8.425	3.306	6.917	7.248	4.432	4.173	4.529	11.35	11.59	6.423	5.528
PEX12	ENSOARG00000006530	ENSOART00000007097.1	peroxisomal biogenesis factor 12	11:14362239-14364670:1	8.322	5.601	4.486	5.654	5.715	7.172	4.909	8.463	8.395	8.338	8.628	4.076	7.104	5.672	3.543	9.842	12.034	11.451	10.475	9.026	8.041	6.956	8.046	9.383	6.733	7.134	4.662	5.201	6.717	6.346
ENSOARG00000013519	ENSOARG00000013519	ENSOART00000014702.1	no description available	3:213128115-213130563:-1	5.049	4.66	4.988	3.966	7.475	9.405	4.194	12.035	7.175	6.983	8.245	6.493	2.194	4.352	7.511	7.939	6.301	6.839	3.992	6.856	7.718	2.34	9.104	6.234	3.415	7.711	6.47	2.947	4.861	4.11
ENSOARG00000003242	ENSOARG00000003242	ENSOART00000003515.1	no description available	14:60510520-60523607:-1	8.033	8.12	5.902	6.839	6.738	12.037	11.08	9.791	9.142	10.257	8.638	7.319	6.259	5.359	4.17	9.754	8.387	6.488	9.09	8.317	9.149	8.599	8.905	6.626	7.614	7.584	5.603	3.594	5.657	5.768
COL5A3	ENSOARG00000014039	ENSOART00000015311.1	collagen type V alpha 3 chain	5:12222994-12268229:-1	2.529	7.184	5.295	3.443	6.209	2.884	6.897	6.104	3.256	6.274	1.624	2.889	3.102	3.32	12.049	2.98	4.312	4.949	3.806	4.261	1.608	3.505	3.519	1.784	1.963	4.863	11.765	11.398	5.936	7.665
MTG1	ENSOARG00000018459	ENSOART00000020093.1, XM_004020271	mitochondrial ribosome-associated GTPase 1	22:50529789-50542535:1	6.335	6.964	3.549	3.734	6.171	10.41	7.398	4.321	5.9	7.987	9.243	7.451	4.082	2.861	3.075	9.085	6.934	5.033	5.851	9.596	10.812	9.453	6.416	7.19	8.753	12.049	10.362	5.938	6.631	10.128
KCTD13	ENSOARG00000005030	ENSOART00000005477.1	potassium channel tetramerization domain containing 13	24:26354516-26367538:1	4.563	9.769	9.884	5.439	6.229	4.201	11.465	12.052	5.449	7.511	3.578	8.081	10.571	4.161	4.998	4.025	8.29	11.582	4.422	7.697	3.897	9.504	10.402	3.658	6.045	4.131	9.59	9.853	4.788	7.718
NOP9	ENSOARG00000019127	ENSOART00000020829.1, ENSOART00000020830.1	NOP9 nucleolar protein	7:20485596-20491635:-1	10.486	5.303	5.422	6.744	6.735	9.444	5.256	7.713	9.909	10.294	12.052	4.674	4.172	4.676	3.97	7.792	5.933	5.266	7.027	7.237	10.226	6.814	9.738	9.72	8.051	10.867	6.869	7.476	8.783	8.144
PGC	ENSOARG00000002540	ENSOART00000002750.1, XM_004018811, XM_012100649	progastricsin (pepsinogen C)	20:15638446-15649849:-1	5.221	3.026	5.495	12.058	4.596	2.938	2.796	5.92	9.84	2.552	4.022	3.244	4.989	9.113	4.023	2.427	3.533	6.812	9.516	2.67	3.527	3.804	5.233	8.141	2.752	4.236	3.384	5.45	7.169	3.926
CYTH3	ENSOARG00000001922	ENSOART00000002065.1, XM_012104872	cytohesin 3	24:38008825-38022781:-1	11.139	6.269	4.223	6.053	6.433	10.593	5.646	4.014	5.082	11.666	10.064	4.435	1.595	3.455	6.145	10.187	6.422	5.666	7.396	8.072	10.829	8.282	7.239	7.199	8.041	12.066	6.49	4.476	5.344	9.841
STAU2	ENSOARG00000006011	ENSOART00000006537.1, XM_012183859, XM_012183860, XM_012183861, XM_012183862, XM_012183863, XM_012183864, XM_012183866, XM_012183867, XM_012183868, XM_012183869, XM_012183870, XM_012183871, XM_012183872, XM_012183873, XM_012183874, XM_012183876, XM_012183877, XM_012183878, XM_012183879	staufen double-stranded RNA binding protein 2	9:49687073-49887490:-1	10.983	6.874	6.616	7.757	10.115	9.796	7.376	6.348	7.403	12.071	11.674	7.897	6.818	8.951	8.851	8.885	6.463	6.186	10.338	8.678	9.43	7.903	6.975	8.54	8.387	11.42	7.9	6.502	9.679	10.317
EVI5L	ENSOARG00000002768	ENSOART00000003005.1, XM_012179184	ecotropic viral integration site 5-like	5:14296139-14319878:1	6.045	10.496	5.098	2.744	7.444	7.394	10.724	4.785	2.301	12.072	6.861	7.947	2.929	2.089	5.615	8.802	8.236	6.88	3.647	10.81	5.779	8.353	6.41	3.473	8.644	5.451	8.319	4.412	2.418	9.478
EDRF1	ENSOARG00000011299	ENSOART00000012291.1, XM_004020363, XM_012103116, XM_012103117, XM_012103118, XM_012103119	erythroid differentiation regulatory factor 1	22:44173563-44202006:1	12.074	5.394	5.224	7.555	3.946	11.857	5.856	7.654	10.839	5.456	10.72	4.974	5.484	8.116	3.175	11.547	5.874	6.132	10.796	4.387	10.476	5.883	6.556	9.343	4.6	10.73	4.054	4.853	7.683	4.498
CREB3L2	ENSOARG00000009957	ENSOART00000010836.1	cAMP responsive element binding protein 3 like 2	4:101365854-101490099:-1	2.057	5.485	2.096	3.018	3.765	5.477	11.277	7.851	3.615	5.137	3.072	4.354	3.142	4.007	3.994	5.173	12.076	8.944	4.1	2.302	5.48	7.211	5.28	6.607	3.835	5.286	9.383	4.378	4.266	5.002
KLF4	ENSOARG00000007169	ENSOART00000007798.1, NM_001164219	Kruppel-like factor 4 (gut)	2:15622912-15625917:1	3.555	6.587	3.098	1.843	4.641	6.834	4.62	3.052	1.51	3.066	4.562	5.791	1.73	0.821	1.117	11.047	7.418	5.677	2.689	4.884	4.041	3.438	3.954	5.601	6.312	5.409	4.005	3.68	4.059	12.08
MBNL3	ENSOARG00000012405	ENSOART00000013487.1, ENSOART00000013489.1, XM_004022339, XM_004022340, XM_012107322, XM_012107323, XM_012107324, XM_012107325, XM_012107327, XM_012107328, XM_012107329, XM_012107330, XM_012107331, XM_012107332, XM_012107333	muscleblind-like splicing regulator 3	X:97353937-97387644:1	5.866	2.966	0.665	1	0.328	8.719	1.873	0.632	0.896	0.674	6.761	2.487	0.171	0.518	0.073	12.081	2.93	1.138	1.765	0.573	3.674	1.02	0.597	1.13	1.043	3.851	1.23	0.295	0.682	0.9
HLCS	ENSOARG00000014127	ENSOART00000015383.1, XM_012104991, XM_012104992, XM_012104997, XM_012105003, XM_012105011, XM_012105018, XM_012105024, XM_012105031, XM_012105038, XM_012105047	holocarboxylase synthetase (biotin-(proprionyl-CoA-carboxylase (ATP-hydrolysing)) ligase)	1:267134766-267279425:-1	12.089	7.224	4.4	5.963	5.857	9.4	6.195	4.334	5.586	8.969	10.682	6.125	2.926	3.267	2.558	8.077	6.258	3.536	5.921	7.657	7.696	5.204	3.368	5.108	5.715	8.395	6.084	3.862	4.321	6.623
GNE	ENSOARG00000011594	ENSOART00000012610.1, ENSOART00000012613.1, XM_004004259, XM_012121134, XM_012121140, XM_012121149	glucosamine (UDP-N-acetyl)-2-epimerase/N-acetylmannosamine kinase	2:52015729-52045460:1	8.089	5.18	6.88	10.425	7.052	7.959	6.009	6.628	9.654	5.313	6.84	5.102	5.693	12.092	5.26	8.449	10.418	7.284	8.498	4.224	7.598	5.427	6.262	8.734	4.74	8.772	5.178	6.152	11.051	5.742
UHRF1BP1	ENSOARG00000010896	ENSOART00000011855.1, XM_012101419	UHRF1 binding protein 1	20:8928578-8985411:1	7.183	4.353	3.635	4.219	6.988	5.538	3.723	4.124	5.484	12.097	8.217	4.622	2.729	4.105	5.243	5.536	4.02	3.308	5.887	7.932	6.99	5.058	5.854	6.772	8.834	7.248	5.179	3.91	4.578	9.617
LRRC14	ENSOARG00000012831	ENSOART00000013947.1	leucine rich repeat containing 14	9:13384690-13387795:-1	7.755	7.059	5.774	6.063	8.034	10.984	8.221	7.558	9.333	12.098	10.574	5.458	4.866	6.467	6.187	9.464	6.291	8.081	7.888	8.493	9.455	8.382	10.024	8.964	8.549	10.555	8.029	8.954	9.032	7.932
LPCAT1	ENSOARG00000016205	ENSOART00000017649.1, XM_012097238	lysophosphatidylcholine acyltransferase 1	16:71516860-71538931:1	4.688	6.895	3.586	2.74	8.711	4.556	8.369	3.844	3.663	12.109	6.004	7.87	3.685	3.246	10.521	2.226	4.017	2.699	3.635	8.296	4.975	6.748	4.22	3.612	8.549	5.356	6.197	3.527	2.297	10.307
ZCWPW1	ENSOARG00000016980	ENSOART00000018491.1, XM_012104548, XM_012104549, XM_012104550, XM_012104551, XM_012104552	zinc finger, CW type with PWWP domain 1	24:36007916-36025735:1	5.386	5.386	5.584	3.907	12.109	4.009	4.267	5.069	4.444	8.374	1.864	2.023	1.824	1.267	3.939	2.087	6.913	3.718	2.972	4.993	2.801	3.649	4.101	3.494	5.121	4.769	6.757	5.753	6.219	8.682
ENSOARG00000008928	ENSOARG00000008928	ENSOART00000009726.1	no description available	22:41646126-41662622:-1	9.838	6.332	6.436	10.378	9.052	8.567	3.661	6.404	9.716	8.407	9.833	4.603	3.198	7.857	5.981	8.132	3.661	5.363	8.448	6.563	10.31	6.308	7.597	10.433	7.827	11.254	5.72	7.184	12.112	10.222
ENSOARG00000019343	ENSOARG00000019343	ENSOART00000021066.1	no description available	1:175935175-175935841:-1	3.694	3.587	4.412	0.662	1.622	3.921	0.246	0.948	0	4.704	1.92	1.527	0.738	1.041	0.88	5.03	2.294	3.322	5.074	3.4	8.473	12.113	3.74	2.588	7.759	7.707	9.146	6.38	5.768	2.136
LPP	ENSOARG00000020484	ENSOART00000022307.1, XM_012097326	LIM domain containing preferred translocation partner in lipoma	1:196681228-197193347:-1	6.517	3.281	3.514	5.669	4.785	6.979	3.867	4.361	9.579	4.299	9.547	4.277	4.438	7.844	6.065	6.86	4.677	3.347	7.569	3.355	9.883	5.072	5.029	9.997	5.672	12.119	5.616	5.539	8.89	6.832
C14H19orf84	101122623	XM_012094683	chromosome 14 open reading frame, human C19orf84	14:56396963-56399449:-1	2.59	6.007	7.184	2.178	10.025	0.693	1.185	1.546	0.519	3.855	3.319	10.028	9.173	2.659	12.12	1.579	7.692	8.432	1.691	10.421	0.702	3.734	4.276	1.274	3.357	1.37	7.023	4.702	1.798	6.007
PTPN7	ENSOARG00000000687	ENSOART00000000742.1, XM_012187895	protein tyrosine phosphatase, non-receptor type 7	12:79084066-79091409:-1	8.929	6.573	5.278	12.122	11.451	5.657	5.794	2.765	5.551	7.359	8.578	5.531	3.584	6.862	11.244	5.819	4.004	3.545	4.926	7.351	8.899	6.917	6.731	9.194	10.512	7.816	7.923	3.878	7.915	8.31
RREB1	ENSOARG00000018168	ENSOART00000019775.1, XM_012101511	ras responsive element binding protein 1	20:47013025-47075042:-1	2.995	7.08	4.202	2.369	6.869	2.134	11.589	7.227	1.837	12.122	2.702	6.509	4.537	1.917	7.623	2.469	9.061	5.926	2.069	6.462	2.145	8.506	7.213	2.676	6.601	1.809	6.95	5.031	1.455	7.074
ENDOV	ENSOARG00000000766	ENSOART00000000822.1, XM_004013085, XM_012186451, XM_012186452, XM_012186453, XM_012186454, XM_012186455, XM_012186456, XM_012186457, XM_012186458, XM_012186459, XM_012186460, XM_012186461, XM_012186462, XM_012186463	endonuclease V	11:51241968-51257900:-1	9.338	9.36	9.009	8.647	8.226	9.869	10.141	9.187	9.591	11.643	12.029	11.682	11.11	7.422	6.026	8.695	8.213	11.526	8.817	8.619	10.032	11.936	12.141	9.625	8.517	9.551	10.736	8.505	9.268	7.778
NDUFAF4	ENSOARG00000012056	ENSOART00000013110.1, XM_004011260	NADH dehydrogenase (ubiquinone) complex I, assembly factor 4	8:39951221-39962020:1	6.729	2.603	3.088	3.951	3.043	7.395	2.699	12.146	11.633	7.526	7.357	2.44	3.3	2.862	1.309	5.74	2.786	3.429	4.919	5.136	7.015	5.18	8.541	6.858	6.218	4.467	4.043	5.637	6.609	4.968
AMER1	ENSOARG00000005413	ENSOART00000005896.1	APC membrane recruitment protein 1	X:44397235-44400591:-1	9.487	4.681	4.187	6.565	7.026	12.147	5.627	5.905	10.797	7.998	10.43	4.58	3.219	6.769	5.221	12.038	6.787	4.692	10.368	6.791	11.705	7.457	7.959	8.194	7.661	11.251	5.214	5.517	7.638	7.094
MAST3	ENSOARG00000013655	ENSOART00000014866.1, XM_012177696	microtubule associated serine/threonine kinase 3	5:4803244-4852959:-1	5.071	7.842	5.424	2.603	9.79	5.736	7.897	5.683	2.469	12.148	5.571	7.975	3.846	2.346	9.415	4.159	6.36	4.436	3.253	7.956	5.421	7.378	6.943	4.441	9.353	4.289	7.315	5.728	2.789	10.217
MLH1	ENSOARG00000016550	ENSOART00000018033.1, XM_012099376	mutL homolog 1	19:10404804-10490985:-1	9.518	6.624	3.35	4.401	5.466	10.6	5.488	4.57	7.165	8.727	11.872	6.469	3.098	5.027	3.59	11.656	6.887	5.303	8.388	8.541	11.067	6.767	5.163	7.923	8.348	12.148	7.513	5.149	6.853	8.436
IL19	ENSOARG00000006445	ENSOART00000007002.1, XM_012186964, XM_012186965, XM_012186966, XM_012186967, XM_012186968, XM_012186969	interleukin 19	12:3894326-3905822:1	0.717	0.39	0.564	2.499	0.28	0.655	0.923	1.671	4.021	0.235	0.731	0.481	1.857	12.154	0.872	0.721	0.402	0.968	2.393	0.287	0.744	0.348	0.372	0.604	0.23	0.776	0.55	0.724	1.5	0.38
ZNF329	101118894	XM_012094913, XM_012094914, XM_012094915, XM_012094916, XM_012094917, XM_012094918, XM_012094919, XM_012094920, XM_012094921, XM_012094922, XM_012094923, XM_012094924, XM_012094925, XM_012094926, XM_012094927	zinc finger protein 329	14:62429115-62438865:-1	9.82	4.921	3.008	4.18	5.726	9.572	4.749	4.515	7.021	9.451	11.162	3.588	1.626	4.545	4.458	10.763	5.101	5.423	7.878	8.99	8.848	5.065	4.393	6.95	6.5	12.157	5.107	4.941	7.054	9.732
ZNF789	ENSOARG00000018521	ENSOART00000020158.1, XM_004021043, XM_012104586, XM_012104587, XM_012104589, XM_012104590, XM_012104591, XM_012104593, XM_012104594, XM_012104595	zinc finger protein 789	24:36764100-36774271:1	8.9	4.328	4.136	6.881	5.982	8.529	4.747	6.679	12.159	8.018	9.604	4.488	3.386	7.459	3.119	7.219	4.805	4.432	7.74	6.125	10.801	5.021	6.252	12.095	7.564	11.505	5.798	5.376	10.894	7.998
BPTF	ENSOARG00000015595	ENSOART00000016974.1, ENSOART00000016975.1, XM_004013438, XM_012186346, XM_012186347, XM_012186348, XM_012186349, XM_012186350, XM_012186351, XM_012186352, XM_012186353, XM_012186354, XM_012186355, XM_012186357, XM_012186358, XM_012186359	bromodomain PHD finger transcription factor	11:48384301-48475220:-1	7.578	10.386	12.162	10.626	7.398	7.42	8.664	10.593	7.47	7.761	8.692	6.808	9.322	7.673	5.759	6.815	5.455	6.61	6.523	4.977	7.451	8.924	8.793	6.957	6.139	6.872	6.546	6.843	6.024	7.521
PIGA	ENSOARG00000012059	ENSOART00000013115.1, XM_004021927, XM_012106260, XM_012106261, XM_012106262, XM_012106263	phosphatidylinositol glycan anchor biosynthesis, class A	X:12786957-12797596:-1	9.136	7.627	7.509	9.903	6.705	11.448	6.027	6.193	8.627	4.912	11.073	6.131	6.093	8.639	6	10.256	7.93	5.716	8.447	4.463	10.173	6.827	6.323	10.614	5.431	10.612	5.973	6.862	12.162	7.108
ATN1	ENSOARG00000005156	ENSOART00000005616.1, XM_012176125	atrophin 1	3:207472756-207485005:-1	1.207	6.407	4.865	0.853	7.965	0.833	5.233	2.788	0.536	9.654	1.084	8.275	3.366	0.584	12.166	0.713	4.807	2.671	0.701	7.179	0.997	7.639	4.892	0.789	7.548	0.709	8.118	4.749	0.461	8.038
EID2	101116852	XM_012190402	EP300 interacting inhibitor of differentiation 2	14:48374974-48376405:-1	2.355	1.388	3.231	4.1	7.713	1.632	1.857	7.348	9.082	5.211	2.889	0.437	1.28	2.254	0.659	1.723	1.345	1.664	4.433	2.529	3.132	1.562	5.616	8.359	4.096	3.351	2.418	6.334	12.168	8.244
LOC101106743	101106743	XM_004022176, XM_012106883, XM_012106884, XM_012106885	rho-related GTP-binding protein RhoG-like	X:60636693-60640745:1	9.688	4.205	6.136	7.064	9.659	8.127	5.006	8.437	10.461	10.555	10.717	5.241	4.871	8.865	6.596	7.728	5.372	7.255	10.039	8.551	9.602	7.168	10.651	12.173	7.339	9.146	4.325	5.278	9.234	9.997
TPCN2	101115493	XM_012102207	two pore segment channel 2	21:45670429-45699015:1	2.875	5.504	2.078	0.972	1.82	3.957	11.388	4.215	2.593	2.635	4.057	6.792	2.183	2.045	4.691	6.208	4.118	8.783	5.02	5.57	3.377	12.179	5.767	3.268	4.629	6.175	7.132	4.539	2.906	6.817
NKRF	ENSOARG00000016167	ENSOART00000017602.1, XM_004022392, XM_012107470, XM_012107471	NFKB repressing factor	X:109252224-109257631:1	7.924	7.293	8.321	7.21	5.477	6.057	6.175	12.18	9.949	8.73	8.1	5.946	5.432	4.799	2.986	5.851	8.759	5.525	5.947	7.209	6.801	9.426	11.103	9.089	6.59	7.384	8.528	10.028	8.934	8.833
ENSOARG00000001004	ENSOARG00000001004	ENSOART00000001071.1	no description available	26:31763034-31777595:-1	3.348	6.302	2.396	3.33	3.153	3.067	9.653	5.177	3.654	2.248	2.651	2.362	2.068	2.996	2.735	3.465	12.182	8.013	7.846	2.077	4.067	9.581	5.927	5.878	3.324	3.948	9.216	4.657	5.254	2.716
DEDD2	ENSOARG00000008127	ENSOART00000008846.1, XM_004015286	death effector domain containing 2	14:50100138-50115183:1	8.578	3.799	3.031	5.506	9.341	6.184	3.736	3.023	4.874	11.017	7.954	2.641	0.719	3.99	12.19	5.814	4.215	4.692	6.632	5.734	6.576	3.377	3.269	5.613	5.857	6.637	4.466	3.213	4.784	7.449
TSC1	ENSOARG00000005657	ENSOART00000006164.1, XM_004007125	tuberous sclerosis 1	3:3884003-3934444:1	9.945	6.869	6.619	6.426	7.025	10.299	7.187	8.038	7.612	10.173	12.19	5.512	5.368	8.538	6.759	10.141	7.007	7.675	9.26	7.246	9.611	8.216	8.266	9.1	7.011	10.417	7.404	7.57	6.982	9.109
C1orf74	ENSOARG00000004302	ENSOART00000004684.1	chromosome 1 open reading frame 74	12:71659955-71660764:1	7.384	2.322	3.787	6.942	5.009	7.782	3.234	6.15	12.191	6.801	9.241	1.666	2.374	7.151	3.796	7.283	3.145	3.744	8.761	6.876	8.788	3.557	5.762	9.976	6.347	9.818	2.683	4.549	10.762	5.829
YIPF1	ENSOARG00000006633	ENSOART00000007211.1, XM_012148289	Yip1 domain family, member 1	1:28113959-28150193:-1	12.192	5.52	3.264	6.074	7.056	10.901	4.471	5.792	8.631	11.754	10.432	3.36	3.061	6.217	3.954	8.836	5.275	5.741	9.511	7.513	11.427	6.989	5.535	9.209	7.817	9.823	5.58	3.868	5.843	5.705
UBIAD1	ENSOARG00000002401	ENSOART00000002601.1, XM_004013723	UbiA prenyltransferase domain containing 1	12:40512765-40524684:-1	6.871	11.179	10.193	6.869	7.958	6.211	11.878	12.201	10.16	10.714	7.463	10.112	9.361	7.403	5.529	5.554	6.37	7.604	6.622	5.556	5.767	9.326	9.233	6.867	7.229	7.027	9.976	9.944	6.224	7.878
GLB1L	ENSOARG00000019976	ENSOART00000021748.1, XM_012146585, XM_012146595	galactosidase, beta 1-like	2:220162450-220168865:-1	9.887	8.485	5.998	5.225	5.481	12.205	10.166	8.217	7.184	9.811	11.134	10.267	7.182	5.279	3.641	11.329	8.62	7.051	7.429	9.761	9.904	7.624	6.166	6.496	7.945	8.474	5.945	5.654	4.541	7.527
ACTR5	ENSOARG00000000216	ENSOART00000000230.1	actin related protein 5	13:67152455-67175574:1	7.709	8.512	6.981	6.032	4.211	7.399	6.303	8.549	8.279	6.177	9.373	4.774	3.856	5.055	3.574	6.901	7.635	7.712	6.974	5.2	7.765	12.213	11.008	7.893	6.502	6.808	6.849	6.829	6.788	5.738
ENSOARG00000001175	ENSOARG00000001175	ENSOART00000001254.1	no description available	4:91598060-91603588:1	8.914	4.41	3.793	8.182	2.806	9.653	4.252	4.51	8.901	3.107	10.64	3.861	3.584	9.795	2.818	10.046	4.552	4.68	9.866	3.07	10.582	4.652	4.675	8.947	4.287	12.214	4.656	5.183	9.654	4.413
ZNF621	ENSOARG00000002789	ENSOART00000003017.1	zinc finger protein 621 [Source:HGNC Symbol;Acc:HGNC:24787] (assigned to orthologue: ENSCHIG00000025599)	19:13294259-13310243:1	12.223	5.771	6.447	11.103	3.947	9.78	6.011	6.801	9.413	4.977	10.591	5.415	5.154	7.941	2.792	9.637	7.009	8.06	9.705	4.634	9.208	5.603	5.983	8.673	5.195	8.559	4.807	5.567	7.833	3.616
DIP2A	ENSOARG00000013377	ENSOART00000014574.1, ENSOART00000014579.1, XM_012104683, XM_012104688, XM_012104696	DIP2 disco-interacting protein 2 homolog A (Drosophila)	1:264294078-264370183:1	5.925	5.633	2.6	3.015	5.702	12.227	8.737	5.32	5.174	10.37	7.366	5.182	2.126	3.181	4.375	8.778	7.282	4.881	4.506	5.765	8.504	6.952	5.038	5.49	6.025	7.924	5.332	3.133	3.68	6.253
PKP4	ENSOARG00000007629	ENSOART00000008308.1, XM_004004677, XM_004004678, XM_012136448, XM_012136455, XM_012136474, XM_012136483, XM_012136501, XM_012136511, XM_012136519	plakophilin 4	2:149843734-150102985:-1	9.102	4.571	3.391	4.9	6.559	7.434	3.452	1.969	5.062	7.779	12.233	5.878	3.12	4.081	3.458	5.696	2.552	1.778	3.316	3.697	10.521	5.838	4.82	8.955	5.876	10.618	5.739	4.507	7.505	7.371
GEN1	ENSOARG00000016702	ENSOART00000018195.1, XM_004005699, XM_012164916, XM_012164921, XM_012164932, XM_012164941, XM_012164949, XM_012164958, XM_012164968, XM_012164974	GEN1 Holliday junction 5' flap endonuclease	3:25744647-25771515:1	8.681	5.117	3.53	5.304	3.631	7.966	4.435	3.401	4.922	7.76	11.231	6.057	3.892	6.878	2.795	5.437	2.545	2.519	3.725	4.693	9.239	5.893	5.773	6.909	6.829	12.235	5.521	5.113	6.475	7.928
E2F5	ENSOARG00000013715	ENSOART00000014922.1, XM_012184183, XM_012184184	E2F transcription factor 5, p130-binding	9:89930376-89941261:-1	10.029	3.282	2.592	6.083	7.555	10.416	11.001	9.447	12.24	9.487	10.656	7.042	4.378	11.108	8.209	9.837	7.724	8.194	10.706	10.392	11.721	5.891	6.557	10.943	9.861	11.643	7.723	7.838	9.657	10.391
ZNF35	ENSOARG00000004597	ENSOART00000005003.1	zinc finger protein 35	19:16348231-16353722:1	10.572	5.327	5.639	8.116	5.048	8.255	5.492	6.893	10.216	5.933	12.25	3.667	4.421	10.116	4.876	6.96	5.401	4.327	9.125	3.616	8.178	4.417	5.031	7.83	3.905	9.957	4.193	5.198	8.474	4.919
ENSOARG00000019801	ENSOARG00000019801	ENSOART00000021561.1	no description available	2:231233140-231234054:1	3.73	5.934	5.719	7.283	3.761	8.555	9.919	8.847	12.254	5.004	5.045	4.531	6.661	7.45	3.872	5.386	3.621	7.684	7.714	5.918	7.556	3.248	4.04	5.837	6.953	4.374	3.18	3.746	4.652	5.979
CHCHD2	101108017	XM_012104815	coiled-coil-helix-coiled-coil-helix domain containing 2	24:27742096-27747988:-1	9.969	12.256	8.659	8.084	8.535	6.188	11.948	7.845	5.379	9.022	2.801	5.754	3.804	1.295	1.451	8.572	8.128	10.584	7.322	7.027	3.708	6.338	5.49	3.796	6.921	2.703	5.916	3.205	3.563	5.161
IQSEC3	ENSOARG00000011662	ENSOART00000012686.1	IQ motif and Sec7 domain 3	3:211037975-211128133:1	0.607	1.668	2.987	1.153	2.61	0.271	2.186	3.089	0.692	8.242	2.627	4.692	8.332	2.545	12.259	0.469	1.358	3.693	1.506	3.684	0.642	2.843	5.824	2.096	2.701	0.527	0.971	2.23	0.854	2.511
NDST2	ENSOARG00000008177	ENSOART00000008907.1, XM_004021477	N-deacetylase/N-sulfotransferase (heparan glucosaminyl) 2	25:29577318-29585215:-1	7.056	4.55	5.142	5.187	7.299	7.706	5.938	7.236	7.263	12.26	8.342	4.8	3.607	6.718	8.315	6.281	5.966	6.362	8.101	9.148	6.458	5.297	7.129	7.091	9.454	6.936	4.452	4.791	5.36	9.55
E2F6	ENSOARG00000015997	ENSOART00000017420.1	E2F transcription factor 6	3:20285142-20292998:-1	12.261	5.777	4.226	6.735	5.687	9.629	4.423	5.479	9.01	7.089	12.226	3.342	3.367	6.149	5.69	8.053	4.148	4.254	8.237	6.855	7.979	4.237	5.777	7.357	5.756	10.678	3.99	5.973	7.854	7.153
NIPAL3	ENSOARG00000006593	ENSOART00000007167.1, XM_004005116, XM_012152004	NIPA-like domain containing 3	2:241344563-241395090:-1	12.182	6.261	4.442	5.171	7.53	10.36	6.863	4.467	5.885	9.165	12.263	7.646	3.08	5.601	6.823	9.927	8.974	7.001	9.909	7.56	8.886	6.459	3.869	6.312	6.421	11.23	7.111	4.733	6.067	8.218
BTBD7	ENSOARG00000013657	ENSOART00000014861.1, XM_004017963	BTB (POZ) domain containing 7	18:56792299-56846866:-1	11.226	3.164	3.839	7.388	5.499	10.44	3.74	5.423	9.39	7.459	12.267	2.179	3.363	9.029	5.226	9.092	3.474	4.953	10.169	4.652	7.638	3.302	4.996	7.905	5.098	10.819	2.566	4.081	8.42	6.524
ENSOARG00000007297	ENSOARG00000007297	ENSOART00000007937.1	no description available	18:67472341-67985124:1	3.455	10.317	6.288	3.196	9.236	3.876	10.772	7.011	3.458	11.478	3.111	6.986	4.743	2.064	9.742	3.388	7.883	12.271	4.216	8.233	3.241	9.968	10.043	3.123	8.273	3.155	12.018	5.445	2.754	10.238
MCU	ENSOARG00000007254	ENSOART00000007891.1, XM_012105261	mitochondrial calcium uniporter	25:28599974-28790310:1	11.707	8.964	6.428	7.167	7.965	10.91	8.675	6.562	8.013	12.242	12.272	9.838	6.386	6.671	7.894	9.2	6.852	5.488	7.712	7.97	11.936	8.581	6.97	8.723	9.153	11.919	8.796	7.038	7.947	10.817
MYO6	ENSOARG00000006673	ENSOART00000007256.1, ENSOART00000007258.1, XM_012182409, XM_012182411, XM_012182413, XM_012182415, XM_012182416, XM_012182417	myosin VI	8:2542527-2644130:1	8.598	4.606	3.984	6.29	6.085	12.272	9.436	6.824	7.689	11.769	10.289	6.437	5.387	7.296	6.918	9.269	6.311	4.919	7.345	6.844	8.006	6.058	5.418	5.967	6.216	7.944	5.998	4.49	4.299	6.821
LOC101110904	101110904	XM_012105232	phosphoinositide 3-kinase regulatory subunit 4-like	1:269499005-269546809:1	10.52	6.034	8.537	11.463	6.506	3.38	3.166	4.154	4.202	2.523	9.815	6.255	9.816	12.276	7.085	8.534	7.064	7.666	11.533	6.249	7.939	6.375	7.09	10.185	6.004	7.866	4.519	6.399	8.882	5.651
LRP6	ENSOARG00000020875	ENSOART00000022743.1, ENSOART00000022744.1, XM_004006855, XM_004006856, XM_012175343	low density lipoprotein receptor-related protein 6	3:202400477-202573736:1	10.363	2.401	2.394	6.442	4.46	8.951	2.219	2.951	7.562	4.875	12.278	3.17	2.035	6.276	4.217	7.41	2.392	2.106	7.33	3.792	12.024	3.108	4.736	11.619	5.269	11.66	2.878	2.346	8.184	5.91
NEDD4	ENSOARG00000020889	ENSOART00000022759.1, XM_012181488, XM_012181489, XM_012181490	neural precursor cell expressed, developmentally down-regulated 4, E3 ubiquitin protein ligase	7:51468584-51565950:1	7.11	3.515	4.239	8.066	4.519	6.934	3.228	2.774	4.017	5.475	12.278	6.308	6.194	9.007	10.703	7.166	2.087	2.117	4.976	3.706	7.884	4.094	4.127	6.531	3.99	9.795	3.719	3.798	6.922	5.042
LOC101105954	101105954	XM_012100067, XM_012100068	coiled-coil domain-containing protein 71	19:50787870-50811369:1	8.413	9.579	9	7.562	9.089	8.051	9.834	12.079	8.997	11.903	10.02	7.88	9.099	7.571	6.639	7.777	5.825	9.671	8.046	8.825	8.734	9.956	12.279	9.633	9.83	10.111	7.767	9.92	8.382	9.63
PRKRA	ENSOARG00000017321	ENSOART00000018858.1, XM_012132652	protein kinase, interferon-inducible double stranded RNA dependent activator	2:130564261-130579334:1	10.596	3.705	2.43	2.01	5.196	9.883	3.307	2.253	2.963	9.239	12.283	4.487	1.248	2.932	4.561	8.324	5.657	3.098	4.51	5.106	8.669	4.026	2.382	4.239	5.252	9.622	3.862	2.261	2.809	7.052
MCCC2	ENSOARG00000005258	ENSOART00000005733.1, XM_004016902	methylcrotonoyl-CoA carboxylase 2 (beta)	16:9905791-9985238:-1	6.546	7.092	6.678	4.779	6.37	6.592	8.669	10.109	5.821	9.324	6.165	7.066	6.686	4.32	4.834	6.292	12.286	10.263	5.667	8.783	6.884	10.556	9.901	6.995	10.28	5.639	7.936	9.056	5.273	8.575
MEAF6	ENSOARG00000019764	ENSOART00000021520.1, XM_012099158, XM_012099209	MYST/Esa1-associated factor 6	1:12098007-12117311:-1	10.773	9.188	7.916	8.468	6.403	9.771	9.378	10.233	10.07	9.161	12.287	9.846	7.184	8.126	6.253	9.594	7.593	7.323	10.667	8.798	9.165	10.552	8.959	10.21	7.705	10.197	10.16	9.529	8.848	9.592
ENSOARG00000018033	ENSOARG00000018033	ENSOART00000019628.1	no description available	JH924489.1:986-1687:1	5.917	6.921	5.706	4.569	6.015	6.976	10.999	8.246	5.607	9.527	5.063	5.26	3.389	2.693	3.501	8.576	10.438	12.29	8.577	8.308	7.417	9.58	7.628	5.625	7.679	7.477	11.561	8.322	6.508	7.222
LLGL1	ENSOARG00000000363	ENSOART00000000387.1, XM_012185803	lethal giant larvae homolog 1 (Drosophila)	11:33938062-33953531:-1	8.877	6.3	3.418	3.145	8.254	8.712	6.225	3.053	3.102	12.302	12.237	7.806	2.587	3.369	5.447	8.661	5.2	3.329	4.511	8.282	8.462	6.874	5.342	5.542	8.918	7.221	5.996	3.4	3.655	8.669
ELP3	ENSOARG00000014910	ENSOART00000016229.1, XM_004004437, XM_012128450	elongator acetyltransferase complex subunit 3	2:101285776-101412541:1	9.511	4.693	5.139	7.748	5.231	8.04	4.642	8.063	12.307	6.548	9.881	4.406	3.691	6.217	3.282	8.486	5.74	6.103	7.943	5.422	9.549	6.11	9.576	11.362	6.454	11.229	4.965	6.907	11.118	7.141
MORN2	101118002	XM_004006006	MORN repeat containing 2	3:85207693-85210910:-1	8.783	2.099	5.881	3.698	3.951	4.107	4.233	2	3.734	8.37	7.184	4.142	2.966	4.983	3.677	3.734	3.992	3.524	5.877	6.123	12.308	3.772	7.885	10.482	7.092	7.565	7.386	7.881	6.27	7.449
FBXL21	100169936	NM_001129738, XM_012177526, XM_012177527, XM_012177528, XM_012177529	F-box and leucine-rich repeat protein 21	5:44737036-44745479:1	7.762	3.538	1.921	1.95	1.924	12.309	5.747	2.251	3.831	12.153	9.015	3.63	2.737	1.657	1.808	1.578	1.07	0	0.685	1.09	7.296	3.894	2.401	3.145	1.61	11.2	4.32	3.486	4.249	4.127
ENSOARG00000002171	ENSOARG00000002171	ENSOART00000002339.1	no description available	JH922195.1:21-3720:-1	5.565	6.238	5.185	4.107	7.721	8.28	7.001	5.116	4.878	12.315	8.333	5.699	4.264	3.989	5.632	7.841	5.346	6.223	5.466	7.037	7.504	5.598	5.898	6.276	6.844	7.28	6.178	5.279	4.114	8.013
ORC1	ENSOARG00000005282	ENSOART00000005759.1	origin recognition complex subunit 1	1:26531083-26561083:-1	9.456	2.532	1.514	2.06	4.387	7.88	1.955	1.24	2.236	7.989	12.322	2.569	1.013	1.943	1.97	6.659	1.629	1	1.375	4.47	8.628	3.042	2.11	2.848	5.887	11.01	3.287	2.156	3.479	6.999
KCNJ15	ENSOARG00000014447	ENSOART00000015730.1, XM_004003411, XM_012105144, XM_012105148, XM_012105151, XM_012105159, XM_012105165, XM_012105174, XM_012105182, XM_012105196	potassium channel, inwardly rectifying subfamily J, member 15	1:268630003-268640061:1	6.829	7.543	10.207	7.607	11.181	7.57	6.932	10.086	11.413	12.085	7.356	6.598	9.143	9.484	12.325	6	5.8	10.518	7.615	10.033	7.292	7.951	9.629	7.536	7.379	7.597	6.807	8.959	6.482	10.383
MMS19	ENSOARG00000010436	ENSOART00000011373.1, XM_012102707, XM_012102708, XM_012102709	MMS19 nucleotide excision repair homolog (S. cerevisiae)	22:17890083-17909531:-1	8.504	5.872	3.85	6.087	7.199	10.995	6.183	6.23	8.059	11.441	10.566	5.453	3.024	4.809	5.16	12.329	7.385	4.916	5.78	9.85	9.754	7.09	6.738	7.299	8.444	11.788	8.019	5.563	6.266	11.085
RFXAP	ENSOARG00000010378	ENSOART00000011287.1	regulatory factor X associated protein	10:25040237-25049476:-1	11.46	4.272	1.846	3.773	6.372	10.915	4.186	3.302	4.839	11.284	12.335	3.427	0.797	4.263	3.488	8.634	6.821	6.113	6.715	8.046	9.136	4.661	3.471	7.085	7.078	11.187	5.729	3.372	5.868	10.648
ZNF318	ENSOARG00000006762	ENSOART00000007354.1	zinc finger protein 318	20:17007158-17032961:-1	9.789	4.553	5.177	5.863	6.114	8.778	4.767	5.081	4.403	8.054	12.341	5.571	4.79	6.124	4.147	7.764	4.789	3.207	3.836	5.426	9.37	4.971	5.126	5.08	7.868	7.518	4.088	3.69	3.51	7.202
CLDN15	ENSOARG00000014939	ENSOART00000016262.1, XM_012104522	claudin 15	24:35371573-35376958:1	4.414	4.128	2.692	2.136	6.402	5.152	3.973	2.05	2.429	8.188	6.327	5.18	1.122	1.782	4.283	5.105	4.646	2.756	3.34	7.685	6.397	6.45	4.152	5.225	12.346	3.742	4.036	1.404	1.54	8.052
TAF4B	ENSOARG00000007045	ENSOART00000007669.1, XM_004020461, XM_012103449, XM_012103450, XM_012103451	TAF4b RNA polymerase II, TATA box binding protein (TBP)-associated factor, 105kDa	23:30837503-30917910:-1	0.361	0.519	1.386	1.023	0.239	0.454	3.818	2.751	2.224	0.451	0.282	0.907	1.316	0.644	0.076	0.278	12.348	2.74	1.088	0.239	0.34	1.253	1.64	0.973	0.337	0.631	1.123	2.153	1.626	0.434
ITGA9	ENSOARG00000000498	ENSOART00000000540.1, XM_004018225, XM_012099386	integrin, alpha 9	19:10846328-11213392:1	2.172	3.238	1.238	0.712	2.62	9.165	7.25	4.16	2.885	12.352	3.04	1.506	0.945	0.968	1.504	8.676	3.458	2.773	3.232	8.136	2.561	1.782	1.016	1.292	2.255	8.598	4.437	2.563	2.282	8.582
DNA2	ENSOARG00000005076	ENSOART00000005538.1, XM_012105188, XM_012105189, XM_012105190	DNA replication helicase/nuclease 2	25:24632619-24667063:-1	8.026	3.1	3.464	6.294	3.662	6.368	2.738	3.426	6.43	4.767	10.891	3.108	2.898	6.297	1.988	5.546	2.121	1.725	3.946	3.585	8.507	3.746	4.228	8.17	5.082	12.354	4.254	5.977	10.593	6.339
STX17	ENSOARG00000010919	ENSOART00000011877.1	syntaxin 17	2:47545229-47599680:-1	8.244	3.808	3.634	7.202	5.557	8.194	5.584	6.772	9.177	5.848	8.475	3.808	3.75	8.6	4.228	8.453	5.61	6.788	12.354	5.759	10.145	5.349	5.641	9.355	8.011	10.024	4.426	4.5	7.574	6.712
ING5	ENSOARG00000017577	ENSOART00000019126.1, XM_012176506	inhibitor of growth family, member 5	1:169621-180017:-1	7.807	12.359	9.626	7.17	5.812	8.359	11.135	9.111	6.96	9.636	8.581	9.014	5.313	7.71	5.296	7.176	7.345	6.602	7.394	6.514	5.754	7.929	7.857	8.491	7.377	8.363	9.802	10.262	8.656	7.103
EXOC1L	ENSOARG00000002031	ENSOART00000002187.1	exocyst complex component 1 like	6:71246797-71266524:1	12.256	5.003	5.696	10.491	6.345	11.316	5.955	6.355	11.866	6.858	12.022	5.95	5.379	9.971	5.114	10.38	6.038	6.398	11.507	5.747	10.686	5.605	6.541	12.109	6.31	12.364	5.588	5.69	12.305	6.573
MED12	ENSOARG00000016238	ENSOART00000017705.1, XM_012106874	mediator complex subunit 12	X:60419035-60441196:1	2.728	9.231	10.283	4.057	7.64	2.502	9.381	9.354	2.322	9.222	4.219	9.63	12.364	4.364	7.543	2.676	9.283	9.811	3.358	7.113	2.658	8.778	9.351	3.902	7.745	2.029	7.91	8.462	2.281	8.098
LOC105605100	105605100	XM_012105651, XM_012105654, XM_012105656, XM_012105663, XM_012105666, XM_012105677, XM_012105680, XM_012105687, XM_012105693, XM_012105697, XM_012105702	zinc finger protein 596-like	1:275555348-275567737:-1	10.543	4.808	5.811	8.227	5.837	8.237	6.296	6.791	9.423	7.952	10.568	4.27	3.555	7.727	5.95	8.025	6.134	6.233	8.8	6.556	9.13	6.708	7.17	10.554	7.769	12.371	7.192	7.646	10.85	9.948
DGKA	ENSOARG00000010838	ENSOART00000011793.1	diacylglycerol kinase alpha	3:163286147-163302420:-1	5.206	4.993	2.667	1.651	4.794	8.723	6.346	3.954	4.658	7.76	6.698	5.584	2.682	1.327	2.962	8.071	6.515	3.451	3.832	5.596	12.374	8.185	4.772	6.126	8.454	9.501	8.187	4.367	3.821	7.715
ENSOARG00000004192	ENSOARG00000004192	ENSOART00000004562.1	no description available	16:5360561-5367338:-1	12.007	9.192	5.711	7.169	4.708	8.895	10.498	8.736	11.306	4.219	11.306	9.086	4.62	8.41	4.251	9.651	1.443	6.043	12.118	5.132	8.391	8.866	6.363	9.159	5.408	12.374	10.724	9.866	9.095	6.585
CLASP1	ENSOARG00000013227	ENSOART00000014394.1, XM_012140412, XM_012140422, XM_012140433, XM_012140440, XM_012140449, XM_012140455, XM_012140464	cytoplasmic linker associated protein 1	2:185573634-185810633:-1	10.145	5.293	3.193	5.782	7.452	7.278	3.716	2.28	4.611	7.926	12.379	6.604	2.849	4.827	7.949	6.604	4.06	4.245	5.861	5.299	8.602	5.806	4.359	7.536	6.552	9.292	5.606	2.965	5.298	7.489
CPSF4	ENSOARG00000018668	ENSOART00000020320.1, XM_012104611	cleavage and polyadenylation specific factor 4, 30kDa	24:36853601-36857334:-1	7.624	6.806	6.356	6.384	9.136	8.892	5.225	8.867	8.378	10.067	12.379	4.247	3.864	6.795	6.845	7.933	4.97	4.973	6.977	8.417	8.919	5.548	9.367	8.174	9.605	10.039	5.272	7.373	7.642	9.282
LOC101122575	101122575	XM_004022074	melanoma-associated antigen D1	X:50301717-50388441:-1	4.975	6.481	6.243	3.665	10.766	3.946	6.546	4.835	3.16	10.168	5.941	7.926	6.101	3.377	9.753	3.791	5.098	6.656	4.679	6.919	6.998	10.467	9.226	5.624	9.819	7.191	12.381	10.538	5.522	10.4
SPIDR	ENSOARG00000011206	ENSOART00000012187.1, XM_012183633, XM_012183634, XM_012183635, XM_012183637, XM_012183638, XM_012183639, XM_012183640	scaffolding protein involved in DNA repair	9:31969455-32162398:-1	9.401	6.59	4.531	6.463	6.853	8.064	5.182	5.056	7.301	6.456	11.202	5.77	4.179	5.742	4.119	9.02	5.835	6.151	7.684	7.561	12.381	8.434	6.951	9.212	8.498	11.053	6.999	5.103	6.666	8.171
ENSOARG00000006676	ENSOARG00000006676	ENSOART00000007251.1	no description available	21:41915948-41922469:1	8.52	4.52	4.364	7.311	4.977	6.558	4.172	7.623	12.385	6.692	7.379	4.29	4.254	6.057	4.128	6.47	4.51	5.321	7.787	5.374	7.741	6.12	7.338	9.621	6.697	8.731	4.698	4.86	8.755	5.815
LOC101110679	101110679	XM_004010800, XM_012182103, XM_012182104	probable ergosterol biosynthetic protein 28	7:83867878-83877693:-1	12.387	4.737	2.425	4.995	5.321	6.35	4.574	8.993	6.308	6.592	7.99	7.097	4.479	5.261	2.082	11.419	0.606	4.891	9.038	3.941	3.942	6.43	2.137	2.872	1.828	5.718	6.309	6.002	7.841	9.496
MED16	ENSOARG00000009839	ENSOART00000010714.1, XM_004009473, XM_012178427, XM_012178428, XM_012178429, XM_012178430, XM_012178431, XM_012178432, XM_012178433, XM_012178434	mediator complex subunit 16	5:40812746-40827056:-1	7.152	8.924	6.153	3.936	7.081	8.009	8.896	6.489	4.649	12.391	10.194	9.721	5.511	3.744	7.043	7.332	7.288	6.582	4.815	8.753	7.111	9.196	7.793	5.371	8.713	8.443	9.534	7.306	4.433	9.249
ENSOARG00000013495	ENSOARG00000013495	ENSOART00000014677.1	no description available	4:2255574-2448893:-1	9.811	4.932	4.159	11.287	3.223	9.826	5.642	4.56	10.186	4.428	9.869	4.799	4.606	9.715	4.279	8.803	5.045	3.629	10.506	2.905	10.596	5.11	7.123	10.618	2.898	12.394	5.663	5.073	11.29	4.619
FANCE	ENSOARG00000011890	ENSOART00000012933.1, ENSOART00000012934.1, XM_004019188	Fanconi anemia, complementation group E	20:9506708-9535783:1	11.674	6.797	5.547	7.631	11.969	8.722	5.582	7.532	9.447	12.396	10.867	6.403	2.989	5.569	7.477	10.887	9.334	6.119	8.146	11.416	11.124	8.238	8.175	10.174	10.097	10.349	7.537	5.739	7.8	10.443
DCAF6	ENSOARG00000012425	ENSOART00000013517.1, ENSOART00000013518.1, XM_004002737, XM_004002738, XM_012185711, XM_012185724, XM_012185732, XM_012185737, XM_012185742, XM_012185752, XM_012185756	DDB1 and CUL4 associated factor 6	1:118216556-118400006:1	12.399	6.504	5.967	7.751	8.062	11.817	5.445	6.535	9.123	9.416	10.955	6.644	4.934	7.234	6.819	9.521	6.374	5.505	9.569	7.044	10.904	6.612	6.787	9.86	7.848	10.506	6.63	5.821	8.309	7.731
ELK4	ENSOARG00000004182	ENSOART00000004551.1, XM_004013558, XM_012186950, XM_012186951	ELK4, ETS-domain protein (SRF accessory protein 1)	12:2684349-2699079:-1	11.789	4.815	5.706	9.583	4.684	10.432	5.394	5.881	8.266	4.701	12.403	5.364	5.291	9.855	3.717	9.275	4.678	5.19	9.001	4.142	8.576	4.454	5.412	8.753	5.805	10.553	4.354	5.329	8.038	6.484
ZCCHC24	ENSOARG00000009888	ENSOART00000010761.1, ENSOART00000010762.1, XM_012105623	zinc finger, CCHC domain containing 24	25:34869892-34931192:-1	5.357	4.161	0.973	0.654	1.623	12.403	4.823	1.567	1.618	3.417	4.791	2.854	0.532	1.023	1.34	11.628	4.43	1.276	3.817	4.001	8.724	4.219	0.948	1.733	3.848	7.125	3.316	0.934	0.927	3.395
TPGS1	ENSOARG00000008637	ENSOART00000009401.1, XM_004008760	tubulin polyglutamylase complex subunit 1	5:40557209-40564045:1	12.404	10.489	5.46	7.299	7.515	9.016	10.864	7.226	5.027	12.377	9.668	9.82	6.983	5.979	5.347	10.382	5.845	5.941	5.547	7.754	8.528	12.377	9.661	5.627	9.427	9.358	9.515	4.753	6.526	8.88
SPHK2	ENSOARG00000011960	ENSOART00000013011.1, XM_012190625	sphingosine kinase 2	14:54309564-54317726:1	6.825	7.408	4.444	4.33	8.902	8.657	8.215	5.704	5.273	12.125	7.233	7.71	3.347	5.149	6.395	7.419	9.037	7.619	5.421	10.451	7.848	9.672	8.248	7.103	11.65	7.654	7.414	5.777	5.683	12.405
ENSOARG00000009741	ENSOARG00000009741	ENSOART00000010594.1	no description available	3:7636864-7651600:1	10.629	9.242	5.692	4.532	7.183	9.168	9.258	5.528	3.868	12.409	10	7.554	3.479	2.616	5.16	7.765	5.563	5.006	4.428	7.865	9.967	9.456	7.378	4.728	7.918	12.377	11.966	5.124	5.66	8.734
RFX5	ENSOARG00000020987	ENSOART00000022865.1	regulatory factor X5	1:100153900-100157876:-1	7.04	4.469	7.203	6.923	6.095	5.938	5.486	12.345	12.409	8.277	8.829	5.062	11.331	10.22	3.07	4.185	5.579	7.388	6.777	6.479	7.516	5.694	9.485	8.707	8.86	7.754	4.424	7.86	9.735	7.31
DBNDD1	101108508	XM_012189692, XM_012189693, XM_012189694, XM_012189695	dysbindin (dystrobrevin binding protein 1) domain containing 1	14:14289351-14297026:-1	7.643	8.55	4.266	3.053	5.094	4.067	3.651	4.4	1.898	12.42	9.429	10.943	3.771	2.539	3.199	2.88	0.994	2.891	3.469	6.27	1.733	5.098	5.97	2.179	2.751	6.505	6.96	5.251	3.53	9.891
GUF1	ENSOARG00000015231	ENSOART00000016579.1, XM_004009801	GUF1 GTPase homolog (S. cerevisiae)	6:63269694-63292131:1	7.761	3.44	1.601	3.215	2.421	9.503	3.194	4.116	7.518	5.823	9.656	3.731	1.646	1.813	0.951	9.606	4.702	2.666	5.22	5.521	10.667	4.927	4.823	8.572	7.045	12.423	4.566	4.32	8.203	7.296
METTL26	ENSOARG00000012615	ENSOART00000013717.1	methyltransferase like 26	24:474567-476250:-1	11.86	7.166	5.784	5.207	5.394	9.41	4.912	4.675	5.527	8.096	12.314	7.487	4.048	4.587	3.626	8.062	4.83	4.301	6.004	6.929	12.427	10.592	7.418	7.923	8.583	9.408	9.066	4.906	6.132	7.801
ENSOARG00000002325	ENSOARG00000002325	ENSOART00000002519.1	no description available	5:14194159-14196643:1	8.124	3.577	5.516	7.644	12.428	6.174	4.577	1.757	1.189	7.52	4.746	2.407	1.899	1.647	6.456	4.294	4.891	4.129	4.237	9.034	3.365	2.628	1.323	2.909	10.187	3.908	2.233	3.018	2.88	4.11
GRAMD1A	ENSOARG00000004660	ENSOART00000005078.1, XM_012190158	GRAM domain containing 1A	14:44842976-44868323:1	6.498	5.316	2.194	1.986	7.305	8.272	6.441	3.525	1.41	5.982	7.263	4.843	3.141	2.043	7.859	6.915	6.222	3.515	1.232	4.262	7.423	7.798	3.352	3.346	12.428	2.95	3.119	1.62	0.986	4.377
GPR171	ENSOARG00000015348	ENSOART00000016699.1	G protein-coupled receptor 171	1:234963475-234964434:1	6.749	2.283	6.043	4.232	0.581	3.43	0.534	0.7	0.72	0.572	9.52	3.776	12.434	7.935	2.141	2.996	0.844	1.015	1.904	1.402	0.946	0.241	0.583	0.629	1.054	1.139	0.113	0.887	0.831	0.646
SOX2	ENSOARG00000014598	ENSOART00000015889.1	SRY-box transcription factor 2	1:203532281-203533162:-1	8.935	1.094	0.16	12.437	0.449	0.03	0.62	0.305	0.104	0.284	0.231	0.872	0.153	0	0.508	0.865	0.841	0.964	0.069	0.327	1.268	0.677	1.109	1.154	1.191	0.737	0.786	0.928	1.628	0.743
CEP192	ENSOARG00000002062	ENSOART00000002231.1, XM_004020651, XM_012103616, XM_012103618, XM_012103619	centrosomal protein 192kDa	23:43556594-43629596:1	11.333	5.325	4.985	7.058	6.053	10.247	4.703	5.756	7.476	8.409	11.949	5.866	4.374	8.224	4.624	8.443	5.002	4.601	7.59	5.774	11.381	6.503	7.312	9.703	7.254	12.439	6.527	6.535	8.696	9.164
ENSOARG00000005594	ENSOARG00000005594	ENSOART00000006093.1	no description available	11:52951149-52951733:-1	10.065	3.211	0.532	0.621	0.561	6.811	2.134	0.499	1.388	3.425	5.376	1.495	0.122	1.403	0.377	12.45	3.255	0.966	2.673	3.626	6.747	4.106	1.016	1.984	2.964	7.729	2.311	1.261	1.467	3.673
MYO9A	ENSOARG00000018863	ENSOART00000020547.1, ENSOART00000020550.1, XM_004010277, XM_012180875, XM_012180876, XM_012180877, XM_012180878, XM_012180879, XM_012180880, XM_012180881, XM_012180882, XM_012180883, XM_012180884, XM_012180885	myosin IXA	7:18466220-18653458:-1	10.05	2.939	1.504	3.488	4.131	12.454	2.825	1.538	4.056	6.105	10.572	3.606	0.953	3.509	4.316	10.648	3.802	1.805	6.922	4.479	11.712	3.794	2.588	6.245	5.103	10.937	3.196	1.976	4.707	5.727
RCN3	ENSOARG00000013207	ENSOART00000014358.1, XM_004015373	reticulocalbin 3, EF-hand calcium binding domain	14:54999020-55007487:1	12.082	5.708	4.251	6.396	6.492	7.861	4.218	3.512	6.852	9.497	12.459	6.056	4.211	5.179	4.181	6.774	4.037	4.238	5.968	7.506	10.751	8.662	6.65	8.233	8.072	12.127	9.232	5.293	7.503	8.026
ENSOARG00000020099	ENSOARG00000020099	ENSOART00000021882.1	no description available	JH924806.1:21-752:-1	5.19	9.002	4.407	3.271	5.965	5.887	6.002	7.331	1.836	0	7.442	7.693	5.266	3.022	3.932	9.473	7.787	5.705	3.807	8.286	6.538	9.331	7.427	4.146	7.937	10.11	12.462	7.021	5.246	8.816
ZNF513	ENSOARG00000019302	ENSOART00000021021.1, XM_004005765	zinc finger protein 513	3:34312081-34315388:-1	9.898	9.131	10.09	12.189	9.516	10.086	9.752	11.673	12.463	9.569	11.022	7.436	8.517	11.559	8.587	9.269	8.057	11.081	11.216	8.54	9.023	10.036	10.852	10.698	7.079	8.617	8.196	9.427	10.425	7.565
STEAP3	ENSOARG00000012368	ENSOART00000013446.1, XM_012139940, XM_012139948, XM_012139958, XM_012139967	STEAP family member 3, metalloreductase	2:183491444-183536977:1	2.383	5.33	6.089	4.166	3.052	5.772	9.7	12.465	12.396	8.805	4.01	3.531	5.942	4.259	2.203	4.101	5.417	9.245	9.765	4.668	5.951	8.486	7.059	7.202	9.369	4.412	4.463	5.525	4.939	4.855
EZR/ENSOARG00000002759	ENSOARG00000002759	ENSOART00000002988.1	ezrin [Source:HGNC Symbol;Acc:HGNC:12691] (assigned to orthologue: ENSCHIG00000017900)	AMGL01127303.1:63-2980:-1	8.259	3.258	2.831	11.14	2.245	6.877	4.116	3.409	11.661	3.543	8.014	3.437	2.841	9.153	2.258	8.626	3.341	3.201	10.436	2.848	9.961	2.648	2.992	12.069	3.221	9.479	3.18	3.559	12.475	2.801
AFMID	ENSOARG00000005462	ENSOART00000005953.1, XM_004013099, XM_012186501	arylformamidase	11:52940811-52962722:-1	4.613	9.403	4.33	1.92	5.377	5.694	6.878	3.723	1.397	6.115	4.044	4.344	1.622	0.996	2.278	9.338	12.478	6.804	3.363	11.584	4.947	7.185	5.634	3.23	8.36	5.199	6.731	5.968	2.685	10.516
ZNF451	101112267	XM_012100440, XM_012100442	zinc finger protein 451	20:3214317-3230727:-1	10.179	4.727	4.015	7.409	4.166	11.104	5.997	6.408	9.008	6.404	12.484	4.064	3.933	6.893	3.818	9.54	4.294	4.378	7.551	4.86	10.411	6.438	7.049	8.585	6.004	12.392	4.802	5.21	8.304	7.437
ZBTB24	ENSOARG00000010329	ENSOART00000011236.1, XM_004011211	zinc finger and BTB domain containing 24	8:27794516-27805237:1	9.769	3.155	4.363	7.562	4.742	11.175	4.08	6.473	9.497	6.552	11.145	2.247	3.115	7.035	4.845	12.488	6.591	6.354	10.403	6.902	9.053	4.933	6.072	8.67	5.636	9.247	3.081	4.583	8.918	5.808
EGR4	ENSOARG00000011851	ENSOART00000012890.1, XM_004006076	early growth response 4	3:95239140-95242176:-1	0.155	3.056	0.224	0.303	0.194	0.208	7.513	0.784	0.245	0.305	0.203	8.301	0.282	0.23	0.083	0.279	5.787	0.508	0.157	0.063	0.295	5.357	1.089	0.329	0.097	0.327	12.498	1.507	0.377	0.203
TCEAL1	ENSOARG00000009947	ENSOART00000010825.1	transcription elongation factor A like 1	X:122221362-122221841:1	3.567	3.195	1.269	1.625	3.301	4.531	2.944	0.967	2.099	3.771	4.216	3.275	1.865	2.852	4.073	4.415	12.498	6.76	5.566	4.179	3.507	2.436	1.38	3.104	3.105	3.711	1.325	1.148	1.889	3.083
BORCS5	ENSOARG00000020864	ENSOART00000022729.1	BLOC-1 related complex subunit 5	3:202219909-202316336:-1	11.776	3.752	3.163	3.786	6.641	8.361	5.957	1.718	5.954	10.087	11.518	5.111	2.203	3.246	3.206	6.739	2.81	2.427	3.908	9.438	8.85	5.05	3.039	8.203	12.501	10.488	4.84	1.969	3.32	9.264
LOC101117755	101117755	XM_004008535, XM_004008537, XM_012177931, XM_012177932, XM_012177933	transmembrane protein 205	5:13418146-13420685:-1	12.191	7.434	4.308	2.934	12.063	12.501	7.502	3.184	5.442	11.471	4.769	2.812	0.534	1.696	3.896	4.862	4.191	4.783	3.924	11.277	10.839	4.885	3.479	5.679	4.226	7.41	5.673	3.282	2.812	8.003
KLHL7	ENSOARG00000012388	ENSOART00000013470.1, XM_004007786, XM_004007787, XM_004007788, XM_012176505, XM_012176507	kelch-like family member 7	4:31722327-31775898:1	9.254	4.223	2.609	6.525	5.173	10.624	3.525	4.443	10.88	11.394	12.364	4.729	3.32	7.89	6.502	10.229	7.153	4.792	11.246	9.164	10.447	4.919	4.63	9.666	7.087	12.517	5.434	3.256	9.059	9.559
SERPINI2	ENSOARG00000001422	ENSOART00000001530.1, XM_004003189, XM_012099893, XM_012099904, XM_012099911, XM_012099914	serpin peptidase inhibitor, clade I (pancpin), member 2	1:217992631-218023375:1	4.362	4.668	4.185	2.709	5.044	4.96	5.233	7.204	5.12	5.669	3.195	3.455	2.983	2.364	3.642	3.599	6.697	4.524	5.43	4.839	7.826	6.163	7.208	12.518	6.048	6.565	6.937	8.451	12.124	9.034
RAD51B	ENSOARG00000021175	ENSOART00000023074.1, XM_012181891, XM_012181892, XM_012181893, XM_012181894, XM_012181895, XM_012181896, XM_012181897, XM_012181898, XM_012181899	RAD51 paralog B	7:76580103-77192871:1	4.539	3.384	1.837	2.24	2.604	6.277	3.97	1.795	3.57	4.757	6.284	3.632	1.708	2.068	1.307	6.41	3.6	2.396	4.378	5.667	12.522	7.141	6.163	8.754	9.581	9.057	4.225	3.91	5.443	6.819
FAM198B	101112349	XM_004017534, XM_012097577	family with sequence similarity 198, member B	17:40532769-40602849:1	2.793	1.014	0.252	0.781	0.933	8.43	4.21	2.2	4.71	2.13	8.182	3.757	1.767	4.01	1.836	6.817	3.334	1.787	2.301	2.508	12.523	6.299	4.561	6.04	6.702	12.217	5.834	3.609	4.868	12.157
IL17RC	ENSOARG00000005521	ENSOART00000006019.1, XM_004018604, XM_012099505	interleukin 17 receptor C	19:16730661-16742011:-1	7.004	7.146	4.955	6.343	4.22	7.683	12.523	7.649	7.792	6.169	5.827	5.307	5.32	4.743	2.322	8.066	6.727	7.375	10.798	4.328	7.568	6.488	8.4	9.375	5.939	6.623	5.001	4.805	7.617	4.556
SLC40A1	ENSOARG00000016390	ENSOART00000017848.1, XM_004004510, XM_004004511, XM_012131317	solute carrier family 40 (iron-regulated transporter), member 1	2:118636935-118659773:1	3.361	3.441	3.161	2.229	2.008	8.458	5.762	1.903	0.754	4.102	9.474	12.534	5.469	2.235	8.396	10.183	4.093	3.178	3.421	2.299	2.85	1.886	1.392	1.154	1.676	3.61	0.815	0.65	0.353	0.625
DNAJC16	ENSOARG00000009524	ENSOART00000010372.1, XM_004013797, XM_012187492, XM_012187493	DnaJ (Hsp40) homolog, subfamily C, member 16	12:50022549-50053664:-1	11.359	5.334	5.74	8.047	6.316	11.228	5.528	6.017	9.877	9.327	12.535	5.365	3.976	8.597	6.708	10.802	5.96	5.253	10.02	5.889	11.282	6.13	6.478	9.312	7.46	12.392	5.608	4.964	8.758	7.479
GRHPR	ENSOARG00000011482	ENSOART00000012487.1, XM_004004247, XM_012120947, XM_012120962	glyoxylate reductase/hydroxypyruvate reductase	2:51002027-51023908:-1	9.11	8.212	6.05	5.333	11.804	8.61	7.236	5.044	3.961	11.866	9.04	8.364	4.895	4.739	11.295	7.957	9.106	6.556	5.76	12.535	7.696	8.475	6.518	6.238	12.261	7.771	7.602	5.343	4.498	9.709
RERE	101114630	XM_012187940	arginine-glutamic acid dipeptide (RE) repeats	12:42854379-43162202:1	1.445	4	1.891	0.707	7.018	1.318	3.324	4.561	0.607	12.535	0.956	5.169	2.621	0.609	6.79	0.941	4.594	3.725	1.128	7.579	0.946	4.37	5.86	0.777	7.165	0.648	4.56	3.042	0.407	7.759
ENSOARG00000001119	ENSOARG00000001119	ENSOART00000001194.1	no description available	13:37722535-37788425:1	9.397	5.293	3.381	4.029	3.289	12.543	7.313	11.196	8.114	6.798	10.029	8.113	4.176	5.811	5.157	12.144	10.227	6.693	9.019	9.005	11.551	10.634	9.332	10.822	10.951	9.17	10.374	8.119	7.678	8.525
FBXL19	ENSOARG00000008120	ENSOART00000008839.1, XM_012104808	F-box and leucine-rich repeat protein 19	24:27048303-27072045:1	6.997	5.098	2.677	7.932	6.354	7.191	4.488	2.53	3.276	12.558	9.242	6.528	2.444	4.652	6.785	5.396	3.406	3.696	4.46	6.271	7.562	5.713	5.165	6.09	7.664	6.677	5.33	2.417	3.557	7.303
TBC1D7	ENSOARG00000013658	ENSOART00000014863.1, XM_012101276	TBC1 domain family, member 7	20:42199673-42223637:1	12.292	6.329	5.104	5.509	9.168	9.218	6.216	6.121	5.833	6.248	10.496	5.696	2.719	4.971	5.853	9.952	6.466	6.05	6.853	10.151	11.65	6.92	6.356	9.341	10.817	12.561	7.797	5.765	6.543	11.915
DCP1A	ENSOARG00000016637	ENSOART00000018121.1, XM_004018383	decapping mRNA 1A	19:47638161-47681496:1	10.176	6.902	8.899	12.062	6.94	8.872	6.777	9.38	12.024	7.349	9.972	5.808	10.519	12.566	6.479	9.573	7.247	9.369	11.468	6.218	8.554	7.141	8.659	9.457	6.284	10.969	6.721	8.2	11.179	7.526
ENSOARG00000008512	ENSOARG00000008512	ENSOART00000009260.1	no description available	2:72323448-72323624:-1	5.409	0.841	1.796	12.569	1.576	5.315	3.641	0	8.03	1.391	5.758	7.212	9.767	10.17	1.634	7.729	4.846	1.026	5.242	0.951	5.035	1.675	2.123	2.752	1.593	7.243	1.619	3.984	8.572	1.622
ZBTB41	ENSOARG00000015070	ENSOART00000016403.1, XM_004013928	zinc finger and BTB domain containing 41	12:74203720-74247187:-1	12.571	7.724	9.477	11.593	5.627	10.384	6.114	6.424	10.547	6.27	10.604	5.04	6.709	10.25	4.512	9.687	6.172	6.104	11.472	5.693	10.897	5.806	6.362	10.436	6.877	10.313	5.46	5.768	8.988	8.459
ENSOARG00000001552	ENSOARG00000001552	ENSOART00000001668.1	no description available	3:863763-880511:-1	7.772	11.308	8.087	6.169	9.495	5.965	9.556	7.429	5.022	11.696	7.56	7.524	5.492	3.864	5.598	8.07	7.687	9.66	5.927	10.082	8.96	12.354	12.572	7.508	12.083	6.564	9.769	7.051	5.453	8.308
C2orf49	ENSOARG00000012959	ENSOART00000014083.1	chromosome 2 open reading frame 49	3:97149831-97158060:-1	11.893	6.589	5.541	7.91	6.651	11.581	5.264	6.244	10.031	10.928	12.58	5.76	7.345	9.43	5.438	9.427	3.654	5.812	9.169	7.14	10.829	4.814	7.051	9.748	7.586	11.139	5.141	6.592	8.69	7.436
MOSMO	ENSOARG00000015198	ENSOART00000016535.1	modulator of smoothened	24:19799028-19804269:1	1.29	6.15	3.658	3.148	5.557	3.26	6.984	9.273	4.748	9.13	2.8	8.171	12.582	5.476	6.169	1.993	6.412	6.664	3.99	4.047	2.252	6.932	8.949	5.395	8.845	4.059	5.748	7.632	4.746	7.931
UBE2E2	100187550	NM_001134307	ubiquitin-conjugating enzyme E2E 2	26:40847344-41196586:-1	3.585	5.785	3.975	1.763	6.754	6.7	10.09	6.223	4.135	12.216	7.158	7.88	6.685	3.103	8.686	5.696	7.28	5.86	3.823	9.532	5.445	6.113	7.654	3.544	6.835	7.578	12.601	6.165	4.658	11.278
ELK1	ENSOARG00000012819	ENSOART00000013933.1	ETS transcription factor ELK1	X:53769961-53775402:1	8.487	11.336	9.298	6.365	12.604	6.578	9.702	8.386	4.444	12.421	8.956	11.744	4.717	4.735	9.36	6.869	8.747	8.976	4.393	10.818	7.301	10.337	9.889	6.954	10.099	7.738	10.991	10.949	5.413	11.968
ZSWIM4	ENSOARG00000008103	ENSOART00000008823.1, XM_012177812, XM_012177815, XM_012177816, XM_012177817	zinc finger, SWIM-type containing 4	5:9941429-9961460:-1	1.456	11.951	8.807	5.77	2.54	1.957	9.886	4.174	2.989	1.575	1.945	12.613	9.811	9.675	3.344	3.077	7.993	6.015	6.096	2.819	3.337	10.791	7.039	5.299	3.229	2.022	9.368	6.279	4.343	2.033
MOCS1	ENSOARG00000000480	ENSOART00000000512.1, XM_012100604, XM_012100605, XM_012100606, XM_012100607, XM_012100608, XM_012100609, XM_012100610, XM_012100611, XM_012100612, XM_012100613, XM_012100614, XM_012100615	molybdenum cofactor synthesis 1	20:13879085-13905770:-1	11.869	5.615	4.508	6.698	12.614	8.234	3.391	6.191	4.8	9.046	10.046	4.589	2.353	4.303	5.474	9.987	6.768	8.55	9.222	11.592	6.676	4.31	5.186	5.571	8.2	7.011	3.858	4.073	5.376	8.266
TRIM35	ENSOARG00000009726	ENSOART00000010585.1, XM_004005249	tripartite motif containing 35	2:38292376-38316371:1	9.604	5.405	5.986	6.629	7.303	8.454	6.136	10.651	9.255	12.615	10.924	2.961	4.671	5.849	6.106	9.662	4.377	7.529	8.149	8.461	9.816	8.262	11.89	9.29	8.875	9.891	6.943	7.848	7.854	8.245
ARL15	ENSOARG00000008076	ENSOART00000008786.1, XM_004016996, XM_012096942	ADP-ribosylation factor-like 15	16:24832048-25295908:1	10.457	6.217	6.306	5.847	7.175	10.756	6.013	3.796	4.623	11.482	12.629	10.276	3.57	3.485	4.255	11.654	6.666	4.395	7.717	11.371	9.535	8.239	4.259	7.254	9.354	11.04	7.063	5.852	6.085	9.021
ENSOARG00000018574	ENSOARG00000018574	ENSOART00000020215.1	NTF2-related export protein 2	JH922398.1:25020-25508:-1	4.515	7.591	2.952	6.745	3.838	8.047	2.215	7.2	12.091	7.047	6.915	8.297	4.235	9.953	2.61	11.579	8.451	2.066	10.023	9.685	8.776	2.926	9.694	10.302	5.717	7.703	8.492	8.469	12.629	7.519
ENSOARG00000010550	ENSOARG00000010550	ENSOART00000011479.1	no description available	12:69270759-69273680:-1	10.003	8.818	8.011	7.514	5.573	12.63	12.475	8.209	3.75	6.8	9.964	6.487	4.314	1.699	4.328	8.381	3.016	3.766	5.142	3.71	8.736	10.114	7.558	6.146	7.015	7.526	6.792	3.569	5.445	7.208
ADM	ENSOARG00000011444	ENSOART00000012442.1, XM_004016162, XM_012095784, XM_012095785, XM_012095786	adrenomedullin	15:41940394-41942719:-1	0.285	0.246	0.175	0.289	3.599	8.416	2.735	2.001	0.514	3.022	1.338	1.142	0.428	0.403	3.822	12.636	7.433	8.637	2.662	4.808	5.506	2.91	1.555	2.969	6.621	1.897	2.59	1.166	2.074	6.433
ENSOARG00000012282	ENSOARG00000012282	ENSOART00000013354.1	no description available	22:32412544-32413702:1	12.64	6.429	6.515	9.929	8.52	8.618	4.436	6.312	7.385	7.442	8.205	6.465	7.228	7.056	7.332	7.759	7.526	5.53	7.172	6.078	7.391	4.817	6.17	7.665	6.263	7.77	7.675	5.63	7.619	7.195
GNG8	ENSOARG00000010648	ENSOART00000011584.1, XM_012190571	guanine nucleotide binding protein (G protein), gamma 8	14:52840115-52846422:-1	5.583	9.517	11.606	6.386	11.899	1.694	6.444	7.39	3.886	3.107	0.923	4.043	1.281	1.805	12.65	4.151	3.562	10.701	5.055	2.639	2.598	6.538	7.234	2.136	10.523	3.016	5.166	2.921	3.706	3.696
LIMK2	ENSOARG00000009784	ENSOART00000010652.1, XM_004017491, XM_012098072	LIM domain kinase 2	17:69525221-69546122:1	9.128	5.816	4.221	7.855	10.012	8.874	5.776	4.364	6.338	8.952	10.606	5.453	2.5	5.515	9.336	9.863	12.65	6.528	7.555	8.35	8.465	5.748	5.266	7.668	7.388	10.385	4.008	4.298	7.226	9.297
ZNF689	ENSOARG00000006773	ENSOART00000007363.1, ENSOART00000007364.1, XM_004020908	zinc finger protein 689	24:26770390-26777105:-1	11.742	6.746	6.182	8.208	7.682	10.871	7.237	8.123	10.364	9.714	12.653	5.323	4.884	8.511	5.657	9.638	6.498	6.223	9.363	7.676	12.286	8.786	8.895	11.341	9.916	11.274	6.667	6.203	8.206	9.193
ENSOARG00000001048	ENSOARG00000001048	ENSOART00000001119.1	no description available	7:77168860-77169162:1	12.654	5.356	6.041	8.752	5.161	0.103	0	0	0	0	3.902	1.832	2.63	4.733	3.01	0.429	0	0.335	0.518	0	0.432	0	0	0.476	0	11.052	7.145	8.453	9.422	8.067
TRIO	ENSOARG00000013279	ENSOART00000014452.1, XM_012097223	trio Rho guanine nucleotide exchange factor	16:58522691-58767037:-1	7.847	6.525	8.929	8.42	9.096	9.117	7.767	11.149	10.683	10.983	11.241	7.466	10.865	9.187	9.657	10.376	9.17	9.971	9.585	7.38	9.34	8.709	12.656	11.124	7.014	8.08	7.357	9.686	8.182	7.39
ZNF7	ENSOARG00000012655	ENSOART00000013755.1, XM_012183412, XM_012183413, XM_012183414	zinc finger protein 7	9:13292920-13302542:1	9.065	4.886	6.017	8.928	6.059	8.835	5.379	8.72	12.656	8.307	9.035	3.534	4.607	8.664	5.194	7.741	6.473	7.078	11.187	6.365	8.524	5.537	6.149	9.739	5.804	9.984	4.659	6.947	9.977	6.8
CIAO2B	ENSOARG00000002536	ENSOART00000002742.1	cytosolic iron-sulfur assembly component 2B	14:33983660-33985397:-1	4.837	8.786	6.552	4.384	1.965	5.711	10.097	12.66	10.511	2.986	4.533	7.149	6.076	8.842	2.478	7.508	5.264	10.441	6.754	6.768	5.336	7.422	6.92	5.668	3.085	4.809	9.095	7.571	5.465	3.609
E2F2	ENSOARG00000007334	ENSOART00000007979.1, XM_012157247	E2F transcription factor 2	2:242209710-242232665:1	10.867	6.649	2.582	3.501	5.348	6.73	4.074	1.796	2.684	8.31	12.66	3.37	1.164	2.792	3.063	4.485	3.706	2.903	4.255	4.069	6.79	4.834	3.112	4.287	6.234	11.339	4.779	3.693	3.734	7.011
IGFBP6	ENSOARG00000016699	ENSOART00000018189.1, NM_001134308	insulin-like growth factor binding protein 6	3:133213326-133216912:-1	6.191	5.779	5.968	9.073	12.663	4.276	3.624	4.75	5.165	7.904	4.08	3.549	2.513	3.454	4.19	3.701	4.814	4.545	5.302	7.417	8.842	8.539	8.272	11.044	11.866	9.557	9.544	10.452	12.591	11.256
RINT1	ENSOARG00000003444	ENSOART00000003747.1, XM_012176684, XM_012176685, XM_012176686	RAD50 interactor 1	4:46662635-46690517:1	11.101	5.298	6.063	8.084	7.201	9.379	5.134	7.49	11.557	9.652	11.289	5.201	4.405	6.693	4.561	8.243	7.633	7.61	10.076	7.728	11.794	6.673	7.364	12.272	8.243	12.672	5.722	6.305	12.001	8.921
ZBTB11	ENSOARG00000018474	ENSOART00000020110.1, XM_004003773	zinc finger and BTB domain containing 11	1:164442906-164471490:-1	12.004	4.393	4.995	9.76	6.26	11.371	5.091	8.53	9.409	7.565	10.534	3.585	4.376	8.895	4.79	8.745	8.548	6.529	9.686	5.698	12.672	6.181	6.387	9.811	6.382	11.572	3.964	6.606	9.124	6.533
ENSOARG00000004057	ENSOARG00000004057	ENSOART00000004410.1	no description available	14:39596692-39604540:-1	7.281	6.748	6.516	5.545	12.679	8.046	4.873	8.161	8.63	7.785	7.379	5.798	4.476	6.155	8.529	7.791	6.954	5.453	6.805	7.353	9.543	10.379	10.889	8.382	10.592	9.046	6.417	5.985	8.31	11.488
TCF7L2	ENSOARG00000012352	ENSOART00000013433.1, XM_012103193	transcription factor 7-like 2 (T-cell specific, HMG-box)	22:32412550-32614736:1	3.155	4.916	10.962	7.502	11.87	2.226	5.023	10.413	4.504	9.195	5.127	8.025	11.906	5.083	12.679	2.887	6.092	6.419	4.908	11.167	2.64	5.129	10.135	4.918	9.8	2.464	6.548	9.817	4.274	7.598
GAT	ENSOARG00000011446	ENSOART00000012444.1, ENSOART00000012447.1, ENSOART00000012449.1, ENSOART00000012450.1	glycine-N-acyltransferase-like [Source:NCBI gene;Acc:280801] (assigned to orthologue: ENSBTAG00000052095)	15:79226138-79261515:-1	11.953	7.147	5.98	10.251	6.202	9.741	6.556	8.598	10.284	8.712	9.834	8.303	7.565	10.293	5.852	8.559	8.709	8.84	12.687	6.963	9.949	8.196	6.922	10.102	8.609	9.933	7.235	6.598	10.096	6.851
MBIP	ENSOARG00000007986	ENSOART00000008695.1, XM_012098826	MAP3K12 binding inhibitory protein 1	18:45369456-45388679:-1	12.687	4.558	3.898	6.367	5.367	11.715	4.527	7.763	10.812	7.755	12.49	3.438	2.615	6.637	4.118	9.309	5.433	4.52	8.759	7.281	10.361	4.814	5.473	9.058	7.584	12.397	3.457	4.972	8.93	7.762
ATG10	ENSOARG00000015475	ENSOART00000016832.1, XM_012178917	autophagy related 10	5:79247125-79500503:1	8.843	7.352	5.621	3.811	7.301	12.352	11.096	8.402	6.77	11.508	8.554	7.46	5.875	2.85	5.13	10.528	7.592	7.211	6.41	6.971	11.51	9.77	7.345	7.101	12.254	12.379	11.118	11.815	7.353	12.689
ICK	ENSOARG00000015160	ENSOART00000016502.1, XM_012100858, XM_012100859	intestinal cell (MAK-like) kinase	20:25018609-25050108:-1	12.692	4.053	3.3	4.664	8.086	5.214	2.451	1.685	3.429	8.174	10.646	5.543	1.826	4.062	7.163	4.013	2.678	1.729	4.312	6.878	6.202	3.362	2.604	5.125	7.034	5.367	3.915	2.025	1.586	5.106
PMVK	ENSOARG00000003056	ENSOART00000003310.1, XM_012182536	phosphomevalonate kinase	1:103717082-103728437:-1	4.399	10.11	7.621	4.957	6.116	9.147	11.089	12.693	10.74	9.953	6.94	7.987	4.228	6.229	5.465	8.695	8.258	8.888	8.966	6.004	8.761	12.113	12.406	9.629	9.654	10.322	12.273	11.218	9.719	9.601
AMN1	ENSOARG00000019402	ENSOART00000021128.1, ENSOART00000021129.1, XM_012175065	antagonist of mitotic exit network 1 homolog (S. cerevisiae)	3:182897534-182976165:1	4.262	3.63	3.901	3.954	3.253	6.641	4.751	6.915	7.842	4.818	4.486	2.808	3.362	6.847	3.704	9.808	8.43	9.763	12.698	5.379	7.827	5.694	6.566	9.25	6.488	7.406	6.056	5.571	7.975	6.302
NDOR1	101108823	XM_012175843	NADPH dependent diflavin oxidoreductase 1	3:1785079-1793028:1	7.365	9.139	6.623	7.926	11.294	8.52	10.543	10.572	9.046	12.474	7.198	7.616	6.332	6.804	11.013	7.654	6.861	11.543	8.378	8.951	9.098	10.752	12.699	10.363	11.868	7.655	10.236	8.002	8.686	10.848
PHRF1	ENSOARG00000006765	ENSOART00000007359.1, XM_012102419	PHD and ring finger domains 1	21:49464084-49493115:-1	5.235	6.875	8.583	6.583	10.545	4.96	8.029	10.994	5.691	11.503	6.601	5.38	6.884	5.808	11.322	5.842	7.534	10.988	6.537	8.98	5.763	8.72	12.699	7.244	10.02	5.301	6.484	8.511	5.801	9.062
TROAP	ENSOARG00000018842	ENSOART00000020522.1, XM_012174344	trophinin associated protein	3:136738878-136746287:-1	4.468	9.433	7.582	4.345	6.012	3.276	8.632	6.208	3.216	6.701	7.103	8.342	7.252	7.33	3.808	2.669	9.265	5.627	2.899	4.811	3.705	11.32	10.651	4.245	6.498	5.712	12.708	11.978	4.584	9.245
ENSOARG00000001997	ENSOARG00000001997	ENSOART00000002147.1	no description available	JH922441.1:21-2150:1	4.582	7.519	5.804	3.328	5.474	4.409	6.929	6.931	3.803	6.967	4.214	7.56	5.484	3.001	3.313	3.686	8.462	6.746	3.35	5.976	5.535	12.711	10.877	4.874	8.537	4.863	8.02	6.66	3.307	5.765
EEF1D/101112908	101112908	XM_012183467	eukaryotic translation elongation factor 1 delta (guanine nucleotide exchange protein)	9:14063515-14072000:1	12.091	12.569	10.823	9.44	7.388	10.387	11.058	10.746	11.52	9.049	10.603	10.127	8.05	5.703	4.731	11.837	9.479	12.002	9.416	7.994	10.375	10.73	12.712	10.093	10.519	10.755	10.524	10.329	10.901	10.95
RPAP2	ENSOARG00000016310	ENSOART00000017764.1, XM_004002195, XM_012176144, XM_012176151, XM_012176161, XM_012176171, XM_012176178, XM_012176185, XM_012176196, XM_012176203, XM_012176208, XM_012176211	RNA polymerase II associated protein 2	1:68746463-68789154:1	11.963	2.291	2.941	9.585	4.217	10.594	3.256	3.729	11.861	4.915	11.729	2.786	2.54	8.577	2.789	9.791	3.202	3.266	11.057	4.696	10.495	3.246	4.59	12.292	4.717	12.713	2.71	3.775	10.539	4.702
GMEB2	ENSOARG00000010596	ENSOART00000011525.1, XM_004014741	glucocorticoid modulatory element binding protein 2	13:53421063-53437834:1	6.047	9.849	8.842	6.872	7.025	9.12	12.717	10.181	7.503	8.597	8.004	10.688	9.387	7.984	7.02	8.031	9.265	8.682	7.235	6.658	6.396	8.97	8.591	5.58	5.315	6.888	10.581	9.315	5.716	6.353
UBXN2B	ENSOARG00000015346	ENSOART00000016701.1, ENSOART00000016705.1, XM_004011965	UBX domain protein 2B	9:37417390-37453099:1	5.476	5.923	6.839	5.696	8.296	6.459	8.052	10.382	9.434	12.719	4.687	6.112	5.157	6.042	6.715	3.475	5.68	7.226	7.884	7.963	6.219	8.808	8.703	7.989	10.131	7.081	9.057	9.375	8.182	11.653
CCDC97	ENSOARG00000007508	ENSOART00000008174.1, XM_004015277	coiled-coil domain containing 97	14:49680479-49692206:-1	3.66	9.986	8.303	3.524	9.287	3.725	11.531	11.28	3.644	12.723	3.57	8.68	6.358	2.883	7.402	3.643	9.928	11.499	3.609	10.624	3.588	11.259	12.502	3.948	12.003	3.697	8.237	8.417	3.126	10.154
QRSL1	ENSOARG00000011094	ENSOART00000012061.1, XM_004011235, XM_012182691, XM_012182692, XM_012182693, XM_012182694	glutaminyl-tRNA synthase (glutamine-hydrolyzing)-like 1	8:30386913-30415930:-1	11.02	4.799	4.655	6.267	4.045	11.235	4.57	6.894	11.014	8.356	11.073	4.092	4.22	6.012	3.14	10.297	4.617	5.203	9.664	5.082	10.407	5.839	6.379	10.143	6.543	12.723	5.31	6.342	9.111	7.043
CLEC10A	ENSOARG00000009867	ENSOART00000010744.1	C-type lectin domain containing 10A	11:26457911-26460684:-1	0.194	1.357	1.326	0.906	0.704	0.213	1.39	1.665	2.348	1.472	0.415	0	2.629	2.705	0	1.117	1.846	7.787	12.726	5.165	1.206	0.861	2.156	4.75	5.852	0.746	0	0.563	2.042	2.9
SEC16A	ENSOARG00000003941	ENSOART00000004292.1, XM_012175868	SEC16 homolog A (S. cerevisiae)	3:2921141-2947326:1	4.248	9.192	8.398	3.986	10.523	3.21	9.864	10.542	3.59	12.253	4.336	8.438	7.57	4.906	10.222	3.324	9.902	12.73	4.432	8.368	3.872	9.909	11.59	5.02	8.908	3.526	8.861	8.009	3.438	10.359
ADD3	ENSOARG00000009304	ENSOART00000010124.1, XM_004020184, XM_012102903, XM_012102904, XM_012102905, XM_012102906, XM_012102909, XM_012102910	adducin 3 (gamma)	22:29623841-29652197:1	7.106	2.777	2.392	4.665	6.508	6.337	3.342	1.98	3.024	9.278	9.463	3.329	1.602	3.166	6.283	4.761	2.969	2.788	5.691	5.318	6.966	3.265	2.319	6.063	8.606	9.653	4.978	4.352	7.712	12.742
GAN	ENSOARG00000008689	ENSOART00000009462.1, ENSOART00000009463.1, XM_012189601	gigaxonin	14:7377796-7397751:1	9.476	4.845	5.19	9.571	5.589	9.347	6.404	5.877	11.83	6.505	9.728	4.197	3.237	6.599	4.631	8.025	7.725	8.05	12.742	4.057	10.226	4.472	6.892	9.307	5.825	12.097	5.795	5.357	10.145	7.816
ENSOARG00000019465	ENSOARG00000019465	ENSOART00000021198.1	no description available	7:22208404-22208994:-1	0.254	0.426	1.6	2.702	1.214	1.207	2.585	3.642	12.743	1.081	0	0	1.548	3.955	0.408	0.105	0	0	0.191	0.461	0	0.222	0	0.159	0.274	0	0.216	0	0	0
TBC1D10A	ENSOARG00000006570	ENSOART00000007139.1, ENSOART00000007141.1, XM_012098049, XM_012098050, XM_012098051	TBC1 domain family, member 10A	17:68846042-68857148:-1	8.562	8.213	3.92	4.901	7.387	11.81	12.746	5.477	7.448	9.569	9.017	6.019	2.52	4.94	8.293	9.562	7.093	3.81	8.553	7.243	10.06	9.003	5.507	8.935	8.499	9.017	8.071	4.902	7.603	7.427
ACAD11	ENSOARG00000008905	ENSOART00000009707.1	acyl-CoA dehydrogenase family member 11	1:255027458-255141792:1	11.91	5.26	3.361	6.129	5.612	11.901	4.725	4.492	8.618	7.455	11.744	4.32	2.635	6.151	4.215	11.221	7.015	5.208	10.164	6.534	12.648	5.803	3.899	10.034	7.398	12.75	5.74	4.122	8.636	8.358
ENSOARG00000005976	ENSOARG00000005976	ENSOART00000006495.1	no description available	X:77499324-77510112:1	2.766	8.634	8.061	2.216	6.58	1.916	7.894	7.888	1.458	12.755	3.083	8.712	4.952	1.789	4.956	2.159	6.201	5.89	1.857	6.007	2.278	7.134	7.903	3.075	6.488	1.996	7.575	6.651	1.729	9.597
ENSOARG00000009922	ENSOARG00000009922	ENSOART00000010801.1	chromosome 3 C12orf4 homolog	3:209562723-209603814:1	10.654	4.389	4.001	7.109	5.481	11.47	6.799	6.35	9.729	8.373	11.258	5.186	3.317	8.829	4.808	10.689	6.488	6.213	11.35	7.81	11.777	6.589	5.774	10.135	7.035	12.769	5.918	5.482	9.616	8.862
ENSOARG00000013827	ENSOARG00000013827	ENSOART00000015044.1	solute carrier family 52 member 2	9:13539321-13541509:-1	5.846	8.115	5.283	4.039	8.473	6.981	9.034	6.099	4.92	12.771	7.152	7.094	4.253	4.571	5.931	6.923	6.049	7.499	6.63	8.999	6.685	9.315	8.731	7.041	8.842	6.769	9.319	6.381	4.516	9.459
C3orf70	ENSOARG00000002245	ENSOART00000002428.1	chromosome 3 open reading frame 70	1:200317271-200317807:1	12.214	1.776	0.995	3.201	5.085	10.918	1.799	1.57	4.31	6.691	12.773	3.512	1.268	2.324	5.149	11.665	4.648	1.524	5.657	8.669	6.2	1.558	1.885	4.48	4.926	9.233	1.892	0.483	4.313	7.969
ENSOARG00000005384	ENSOARG00000005384	ENSOART00000005875.1	no description available	5:15434573-15465862:1	9.881	6.749	6.407	7.575	5.976	10.952	7.651	6.961	8.15	7.259	10.511	7.679	6.822	8.414	6.071	11.345	12.773	10.72	11.269	6.688	10.046	7.913	7.485	8.933	8.301	8.446	5.733	5.749	7.392	6.821
DCAF16/ENSOARG00000000470	ENSOARG00000000470	ENSOART00000000499.1	DDB1 and CUL4 associated factor 16	6:37278639-37279289:-1	8.962	4.413	3.046	4.881	6.26	7.139	3.39	3.069	5.7	8.339	10.197	5.102	3.16	4.668	4.098	7.932	4.311	3.498	5.436	7.16	12.588	5.268	5.726	8.277	9.533	12.779	4.463	5.953	7.713	11.823
WIPF3	ENSOARG00000008806	ENSOART00000009585.1, XM_012177431	WAS/WASL interacting protein family, member 3	4:66382159-66410518:-1	0.563	3.873	3.365	0.418	6.833	0.072	1.664	2.571	0.174	2.598	0.217	3.62	2.995	0.552	3.978	0.433	9.996	8.375	0.448	7.44	0.645	7.822	10.769	0.917	9.123	0.538	8.337	12.785	1.112	9.041
ZNF830	ENSOARG00000003942	ENSOART00000004282.1	zinc finger protein 830	11:14709592-14710713:-1	12.787	9.881	9.298	9.389	8.012	10.328	9.427	9.707	11.195	9.633	12.183	8.107	8.451	10.208	5.872	8.762	7.722	8.476	9.761	6.897	9.899	7.941	9.466	10.793	7.901	11.137	8.801	9.758	10.886	10.092
ENSOARG00000011061	ENSOARG00000011061	ENSOART00000012031.1	no description available	JH922873.1:21-361:-1	0	2.36	0.389	0.319	0	1.835	12.789	1.384	0	2.485	0	1.508	0	0	0	4.084	0	0	0	6.379	0	4.303	0.5	0	0	1.637	8.67	0	0	5.254
RASAL2	ENSOARG00000015973	ENSOART00000017396.1, ENSOART00000017398.1, XM_004013826, XM_004013827	RAS protein activator like 2	12:57584009-57975036:1	8.869	5.159	2.64	2.972	3.611	12.793	7.507	4.305	3.451	8.306	7.893	4.786	1.718	1.779	1.961	8.305	7.456	1.862	2.778	3.738	8.583	6.24	6.001	5.053	7.174	8.858	6.971	5.513	4.906	5.791
ANKRD32	101108386	XM_004009082	ankyrin repeat domain 32	5:91294160-91367104:1	11.055	4.785	3.304	5.69	6.06	9.245	4.077	5.054	8.361	8.586	12.794	5.419	3.47	9.079	5.515	7.774	4.231	4.298	7.732	6.803	9.026	4.648	4.382	7.306	5.877	11.358	5.082	4.329	7.775	6.742
MED9	ENSOARG00000001828	ENSOART00000001963.1, XM_012186743	mediator complex subunit 9	11:34365549-34377333:-1	9.938	6.736	6.964	11.984	8.511	9.523	10.007	10.769	10.266	11.322	10.209	8.83	4.437	7.061	5.421	7.995	7.257	8.645	8.561	7.592	10.607	9.384	11.638	11.165	8.706	12.797	7.919	11.33	11.491	7.786
ERI3	ENSOARG00000000823	ENSOART00000000882.1, XM_004001901, XM_012120995, XM_012121058, XM_012121196, XM_012121260, XM_012121325, XM_012121405, XM_012121483, XM_012121548	ERI1 exoribonuclease family member 3	1:18694160-18777545:-1	10.965	8.182	5.756	4.192	7.224	10.095	9.514	8.257	7.092	9.792	10.516	8.229	5.279	3.781	3.697	11.689	8.613	7.714	7.511	10.244	12.804	9.237	8.685	9.312	11.252	12.789	11.368	9.146	7.317	10.655
LOC101122819	101122819	XM_012100138	15 kDa protein B-like	19:52214730-52228070:1	0.374	1.019	0.8	0.69	0.172	12.811	12.742	11.074	6.88	3.811	2.056	0.815	1.506	0.88	0.698	12.133	10.143	9.502	11.686	3.851	2.481	2.312	1.532	1.504	1.336	4.69	4.341	7.526	3.076	1.142
LRR1	ENSOARG00000020599	ENSOART00000022442.1, XM_004010995	leucine rich repeat protein 1	7:39735889-39746003:1	12.819	6.063	6.166	8.443	6.934	8.957	5.819	7.043	9.884	8.465	12.235	4.231	4.939	8.795	3.626	7.105	3.331	5.669	7.767	6.212	9.662	6.488	6.197	8.782	7.408	11.201	6.517	6.694	10.197	8.498
MBTD1	ENSOARG00000002872	ENSOART00000003113.1, XM_012185842, XM_012185843, XM_012185844, XM_012185846, XM_012185847, XM_012185848, XM_012185849, XM_012185850, XM_012185851, XM_012185852, XM_012185853, XM_012185854, XM_012185855, XM_012185856, XM_012185857	mbt domain containing 1	11:35081130-35115807:1	10.922	2.445	2.563	4.672	2.852	12.823	2.262	2.284	5.64	4.613	11.221	2.762	1.101	4.763	2.799	12.224	3.565	2.516	7.868	5.298	9.307	3.219	3.498	6.855	4.839	8.07	2.183	3.257	5.858	4.171
NOC4L	ENSOARG00000011688	ENSOART00000012713.1	nucleolar complex associated 4 homolog	17:44600540-44605161:-1	3.868	6.61	7.477	5.167	3.695	3.354	5.382	11.338	8.38	6.44	4.633	4.129	4.47	1.974	1.232	3.579	5.419	5.085	3.478	5.371	4.085	7.168	12.826	6.616	5.167	5.37	7.072	9.9	6.856	6.72
TRIM33	ENSOARG00000019960	ENSOART00000021730.1, XM_004002354	tripartite motif containing 33	1:90870704-91024292:-1	9.809	5.332	6.348	8.725	5.593	8.429	5.75	9.453	12.826	7.804	10.825	4.929	6.185	10.859	6.028	7.972	4.137	6.571	10.018	5.581	9.094	6.726	7.685	9.433	6.387	9.865	4.6	7.534	9.175	7.46
LOC101102509	101102509	XM_012094790, XM_012094791	killer cell immunoglobulin-like receptor 3DS1	14:59799056-59806785:-1	6.606	6.242	5.899	7.105	5.531	7.594	6.447	9.473	12.84	5.394	6.815	4.568	5.771	5.598	3.434	2.976	2.142	3.3	3.982	3.13	4.424	4.516	5.593	6.728	5.193	9.992	9.138	8.692	11.759	8.325
TAB1	ENSOARG00000016603	ENSOART00000018086.1	TGF-beta activated kinase 1 (MAP3K7) binding protein 1	3:214825403-214837410:1	10.531	3.259	2.742	4.9	6.116	9.919	4.053	5.216	8.661	8.681	12.846	3.083	1.766	5.39	5.146	8.419	3.632	4.924	7.302	6.355	8.899	4.586	5.484	7.828	7.105	10.518	4.388	3.617	7.478	7.134
RIOK1	ENSOARG00000017747	ENSOART00000019312.1, XM_012101333, XM_012101334	RIO kinase 1	20:46898345-46910717:-1	6.17	5.897	8.733	9.671	4.105	5.662	5.918	12.847	12.614	4.914	6.744	3.544	5.413	4.856	3.138	5.054	5.454	3.607	5.352	3.732	6.919	7.239	11.249	8.311	4.383	7.605	5.868	9.711	11.59	5.661
CDK13	ENSOARG00000017590	ENSOART00000019143.1, XM_012177003	cyclin-dependent kinase 13	4:80990229-81081618:-1	12.152	6.849	7.282	10.005	8.122	11.185	7.514	9.961	9.9	9.694	12.849	6.474	6.924	9.416	7.759	10.226	7.265	8.682	10.634	7.106	10.189	7.764	9.936	10.387	7.26	10.922	5.782	7.833	9.703	8.259
MLLT4	101115800	XM_012183349	myeloid/lymphoid or mixed-lineage leukemia (trithorax homolog, Drosophila); translocated to, 4	8:88919370-88999533:1	4.633	4.007	4.183	7.046	11.3	3.529	2.972	5.293	7.095	6.026	6.121	3.718	4.549	7.683	12.861	2.936	3.048	3.464	4.792	4.638	4.602	5.805	7.255	8.804	4.46	4.496	5.511	6.058	8.376	5.355
INTS4	ENSOARG00000006741	ENSOART00000007331.1	integrator complex subunit 4	21:17425508-17537448:1	9.922	5.296	5.285	7.805	5.576	9.999	5.059	7.628	12.862	8.38	10.912	5.988	4.884	9.561	5.157	8.552	4.905	6.309	11.794	5.82	9.253	5.822	6.797	10.478	6.547	11.326	6.482	5.765	9.909	7.268
GYG2	ENSOARG00000008304	ENSOART00000009038.1, XM_012106158, XM_012106159, XM_012106160, XM_012106161, XM_012106162	glycogenin 2	X:1270637-1286275:1	6.367	10.772	7.617	5.995	7.053	7.902	12.864	6.627	6.651	11.456	5.851	5.293	2.81	2.062	3.832	7.018	5.964	4.954	5.28	6.789	10.712	11.689	11.91	8.501	7.065	7.613	9.421	7.381	5.035	6.709
DENND1C	ENSOARG00000005599	ENSOART00000006103.1, XM_004008573	DENN/MADD domain containing 1C	5:15613142-15622941:1	7.088	10.395	8.699	5.58	11.815	7.102	9.398	6.495	2.799	12.357	9.78	11.805	8.363	3.614	6.492	6.187	8.754	8.282	4.108	10.218	9.664	12.644	9.892	7.496	12.867	7.561	10.346	7.765	4.282	12.392
PHACTR1	ENSOARG00000013835	ENSOART00000015057.1, XM_012101278	phosphatase and actin regulator 1	20:42249219-42485512:-1	7.671	4.928	2.247	2.694	5.014	10.23	7.155	1.689	2.664	12.869	8.465	5.978	1.864	2.768	5.094	6.493	9.819	3.216	3.315	5.963	5.349	5.469	2.5	2.702	4.235	7.823	5.076	2.425	1.825	8.592
GPM6A	ENSOARG00000006518	ENSOART00000007083.1, XM_004021679, XM_012105681, XM_012105682	glycoprotein M6A	26:6097721-6215956:-1	3.254	2.923	1.493	1.395	0.796	5.792	3.087	1.133	2.543	1.337	8.933	5.743	4.777	4.297	2.583	12.877	3.752	2.589	4.805	2.603	6.607	3.688	3.95	5.013	3.309	7.964	2.825	2.477	2.9	2.759
PUS7L	ENSOARG00000019691	ENSOART00000021441.1	pseudouridine synthase 7 like	3:142772206-142789364:1	8.917	5.488	6.061	9.297	4.709	6.606	5.712	7.233	10.345	3.866	6.739	3.144	2.911	5.588	2.947	7.675	7.27	8.175	12.878	5.052	7.368	6.278	7.08	10.925	4.237	7.227	5.221	5.74	10.373	5.765
LAMA5	ENSOARG00000013521	ENSOART00000014721.1, XM_012189430	laminin, alpha 5	13:54199750-54247637:1	1.256	3.556	2.8	2.251	12.88	0.557	1.772	1.375	0.618	2.915	1.041	3.132	1.864	0.522	4.489	0.422	1.211	1.092	0.427	2.28	0.746	2.48	2.306	1.814	3.492	0.342	1.181	1.02	1.206	3.957
CTPS2	ENSOARG00000012945	ENSOART00000014076.1	CTP synthase 2	X:14077624-14181617:-1	9.645	7.045	4.504	6.483	9.404	10.677	6.497	6.048	8.053	8.2	11.438	5.844	5.158	6.162	7.604	11.438	9.438	6.741	7.674	8.668	11.898	5.934	5.385	8.026	7.308	12.883	7.819	6.242	8.793	9.805
FAM185A	ENSOARG00000018729	ENSOART00000020391.1, XM_012176630, XM_012176631, XM_012176632, XM_012176633	family with sequence similarity 185, member A	4:44059556-44105920:1	8.773	4.347	2.487	4.032	4.614	9.192	3.955	3.007	5.624	6.916	8.891	5.495	1.298	2.683	2.523	7.45	2.599	2.52	5.504	3.881	10.742	5.562	4.713	8.307	6.6	12.888	5.115	3.407	8.094	7.678
GCN1L1	101117194	XM_012097906	GCN1 general control of amino-acid synthesis 1-like 1 (yeast)	17:62130818-62185548:-1	9.682	7.595	6.789	8.036	9.736	7.927	6.655	7.701	8.006	11.477	12.891	7.037	6.155	6.23	6.819	9.239	7.283	6.443	7.298	8.235	8.321	8.765	9.624	8.442	8.409	10.858	8.58	7.135	7.393	9.299
SLC16A7	ENSOARG00000004681	ENSOART00000005094.1, XM_004006510	solute carrier family 16 (monocarboxylate transporter), member 7	3:159525069-159650348:-1	1.283	1.129	0.94	1.007	0.57	0.535	0.416	0.936	1.581	0.418	0.867	0.743	0.374	1.743	0.986	5.738	4.072	4.231	12.895	4.428	1.314	0.765	0.569	0.899	0.728	3.884	3.53	3.317	3.707	1.512
ENSOARG00000008500	ENSOARG00000008500	ENSOART00000009249.1	no description available	15:76531240-76532756:1	10.463	0.067	0.071	6.434	0.062	12.896	0	0	9.289	0	8.338	0	0	7.13	0	10.933	0.127	0	10.641	0	8.009	0.072	0	7.574	0	7.23	0	0.076	8.711	0.061
LOC101120607	101120607	XM_012098255	protein HIRA	17:71830543-71874359:-1	11.376	11.328	7.464	6.681	8.061	9.951	9.349	7.8	7.818	12.139	12.896	9.793	6.478	5.026	5.536	9.294	6.96	5.841	6.015	7.652	9.111	9.498	10.133	7.604	7.291	9.709	9.384	7.274	7.231	9.219
UPF3B	101101868	XM_004022388, XM_004022389, XM_012107457, XM_012107458, XM_012107459, XM_012107460, XM_012107461	UPF3 regulator of nonsense transcripts homolog B (yeast)	X:109013940-109030230:1	10.403	8.377	6.407	7.603	9.775	9.372	9.054	10.117	10.998	12.588	9.065	8.203	6.192	8.798	6.761	9.45	9.093	12.607	12.905	11.357	9.582	9.621	11.463	9.516	9.948	11.038	10.386	9.401	10.717	11.816
GRB10	ENSOARG00000013819	ENSOART00000015043.1, XM_012177410	growth factor receptor-bound protein 10	4:5114412-5296196:1	8.288	6.841	5.449	5.236	12.692	3.01	2.355	2.369	2.8	4.353	8.53	3.914	4.755	5.048	10.591	9.736	7.229	7.044	5.747	11.875	10.213	9.432	9.596	10.784	9.225	12.907	9.678	8.117	9.045	12.794
LMBR1	ENSOARG00000007063	ENSOART00000007692.1, XM_012177400	limb development membrane protein 1	4:117583386-117710453:-1	12.909	10.263	6.541	6.129	7.948	10.939	7.134	6.567	7.242	9.616	11.978	6.708	4.388	4.641	4.713	12.201	10.43	9.602	9.589	7.919	8.982	7.178	7.807	6.353	6.482	11.227	9.215	6.484	7.343	10.21
USP46	ENSOARG00000018560	ENSOART00000020202.1, XM_012179968	ubiquitin specific peptidase 46	6:68273683-68350968:-1	10.324	6.092	6.215	8.092	8.942	11.878	4.527	5.355	10.197	11.957	12.918	5.097	3.331	7.394	6.939	8.83	4.802	4.077	9.192	7.142	10.964	5.147	7.387	9.393	7.899	12.622	5.848	5.344	8.989	8.323
LPCAT4	ENSOARG00000019872	ENSOART00000021635.1	lysophosphatidylcholine acyltransferase 4	7:25263546-25270541:1	5.913	6.577	3.983	2.807	7.962	2.926	3.441	3.157	2.095	9.701	6.99	8.744	3.416	1.074	3.044	2.205	2.55	2.081	1.227	5.85	6.871	8.787	6.325	4.224	12.927	4.831	9.503	5.151	3.074	12.725
AKAP8L	ENSOARG00000003411	ENSOART00000003707.1, ENSOART00000003708.1, XM_004008461, XM_012177757, XM_012177758, XM_012177759, XM_012177760, XM_012177761	A kinase (PRKA) anchor protein 8-like	5:7513770-7531274:1	11.354	6.541	7.856	9.166	6.748	12.785	7.322	8.832	11.079	10.243	11.343	4.994	5.986	6.973	4.46	12.933	7.571	8.449	10.964	8.688	12.799	8.421	10.1	9.167	7.732	10.85	6.719	8.047	9.125	7.892
LOC101109643	101109643	XM_012095884	interferon-induced very large GTPase 1-like	15:45747325-45754080:1	12.942	4.696	3.957	9.485	2.728	4.483	4.562	4.706	2.927	3.792	7.41	7.462	6.749	6.746	2.449	3.859	5.757	3.116	10.208	3.62	4.614	5.683	1.965	5.55	4.222	6.591	5.923	5.505	8.297	4.737
ARHGEF12	ENSOARG00000017361	ENSOART00000018910.1, ENSOART00000018915.1, XM_004016575, XM_012095611, XM_012095612, XM_012095613, XM_012095614	Rho guanine nucleotide exchange factor (GEF) 12	15:30480790-30607955:1	12.079	4.517	4.126	6.586	4.744	12.595	5.708	4.712	7.086	11.195	12.943	6.147	4.082	6.158	3.848	10.391	4.728	3.979	7.518	6.29	10.733	6.151	5.377	8.414	6.453	10.757	4.749	3.378	6.037	6.55
ENSOARG00000010310	ENSOARG00000010310	ENSOART00000011218.1	no description available	AMGL01123746.1:95-1582:1	12.954	1.109	1.924	9.628	0.954	4.577	1.718	1.165	4.744	1.734	5.33	2.149	1.673	3.833	1.331	4.65	1.304	1.965	4.673	1.972	4.779	1.266	1.352	4.567	1.714	4.17	2.226	2.124	3.392	1.861
ANKRD16	ENSOARG00000007810	ENSOART00000008507.1	ankyrin repeat domain 16	13:41989254-42002372:1	9.77	5.492	3.479	3.69	5.061	11.323	6.33	5.566	7.603	12.957	11.075	6.125	2.373	2.449	4.663	10.605	4.56	4.746	5.876	9.07	10.713	7.506	7.212	7.697	9.086	12.794	7.703	3.822	5.621	10.326
MBTPS2	ENSOARG00000016142	ENSOART00000017578.1	membrane bound transcription factor peptidase, site 2	X:19090997-19134512:1	7.629	6.036	5.947	5.084	7.953	8.713	8.292	8.109	7.92	12.957	8.987	7.153	4.005	4.789	6.058	7.729	7.776	6.921	8.198	9.524	10.601	9.394	8.872	9.217	10.777	10.375	8.45	7.372	7.985	10.521
RBFOX2	ENSOARG00000018669	ENSOART00000020323.1, XM_012174982, XM_012174983, XM_012174984, XM_012174985, XM_012174987, XM_012174988, XM_012174989, XM_012174990, XM_012174991, XM_012174992, XM_012174993, XM_012174994, XM_012174995, XM_012174996, XM_012174998, XM_012174999, XM_012175000, XM_012175001, XM_012175002, XM_012175003, XM_012175004	RNA binding protein, fox-1 homolog (C. elegans) 2	3:178979478-179189195:-1	12.96	6.632	5.658	11.836	10.351	6.751	5.952	5.625	6.596	6.783	10.743	7.793	5.882	7.607	9.311	6.287	5.319	6.634	8.446	7.108	9.769	7.125	8.607	11.297	7.934	9.294	7.011	7.624	10.584	10.166
TADA1	ENSOARG00000011859	ENSOART00000012901.1	transcriptional adaptor 1	1:116919706-116934016:-1	11.589	5.132	6.175	6.529	6.383	11.756	7.26	8.539	12.322	9.165	12.964	3.523	5.187	6.561	4.517	12.418	6.586	7.077	9.573	8.439	9.745	4.85	8.16	9.108	7.989	12.189	4.742	6.359	9.673	9.714
KIF3C	ENSOARG00000018463	ENSOART00000020097.1, ENSOART00000020098.1, XM_012175941	kinesin family member 3C	3:33098874-33144719:-1	2.836	6.231	4.8	2.802	4.946	2.447	12.973	12.425	6.396	5.341	2.626	5.986	8.098	6.455	5.231	2.406	8.055	10.847	5.826	3.458	3.113	8.146	4.902	3.837	3.864	2.582	5.283	4.821	3.304	3.552
HMGN4	ENSOARG00000000137	ENSOART00000000141.1, XM_004019063	high mobility group nucleosomal binding domain 4	20:30503133-30510640:-1	10.747	5.199	4.017	8.053	5.677	7.954	4.118	4.971	8.101	7.602	11.508	5.155	5.434	7.561	4.596	7.19	3.925	4.158	7.752	4.866	11.266	7.523	7.299	12.631	7.561	12.989	7.511	5.594	10.074	7.06
MYCBP2	ENSOARG00000016305	ENSOART00000017799.1, XM_012184802	MYC binding protein 2, E3 ubiquitin protein ligase	10:52632130-52906099:-1	11.675	6.597	3.35	5.088	6.719	10.016	5.572	3.141	4.126	7.721	12.989	8.842	2.943	4.374	6.561	10.36	7.426	4.106	5.384	5.567	8.538	5.433	4.212	5.056	5.706	9.361	6.491	3.314	4.442	7.676
ENSOARG00000014981	ENSOARG00000014981	ENSOART00000016302.1	no description available	5:12346143-12352990:1	6.4	7.081	8.614	8.631	5.917	4.343	5.243	11.526	12.991	3.707	6.417	2.499	5.313	3.348	0.909	4.257	7.388	4.333	6.555	4.93	5.88	7.005	9.278	8.591	3.234	7.385	5.251	11.981	10.546	3.76
ENSOARG00000013905	ENSOARG00000013905	ENSOART00000015139.1	sel1-repeat-containing protein YbeT-like	6:24764224-24769326:-1	3.661	1.299	0.401	0.883	0.351	2.589	0.808	1.354	1.363	0.93	2.042	0.691	1.123	0.384	0.878	11.779	12.999	7.332	7.182	5.541	12.267	6.841	6.976	6.462	7.521	4.137	4.011	3.604	2.7	2.995
SWSAP1	ENSOARG00000018243	ENSOART00000019849.1	SWIM-type zinc finger 7 associated protein 1	5:13441360-13442647:1	7.329	4.676	4.349	6.856	10.718	6.721	2.927	4.862	7.333	10.24	5.143	3.499	2.807	5.566	11.419	4.775	4.977	6.612	7.982	9.729	6.928	5.292	5.358	7.961	12.999	7.397	4.289	4.975	7.867	8.692
CDK19	ENSOARG00000009968	ENSOART00000010849.1, XM_012182597, XM_012182598, XM_012182599, XM_012182600, XM_012182601, XM_012182602, XM_012182603, XM_012182604	cyclin-dependent kinase 19	8:26640998-26762067:1	12.932	5.551	3.463	4.524	4.5	10.464	4.774	3.101	4.341	8.357	13.002	7.384	3.97	5.705	4.965	7.055	3.98	3.588	6.858	5.724	9.609	5.353	3.928	5.433	5.694	11.449	5.563	3.486	3.971	8.095
SCAF1	ENSOARG00000013297	ENSOART00000014464.1, XM_012095125	SR-related CTD-associated factor 1	14:55078761-55090474:1	3.047	6.446	6.879	3.552	10.299	2.706	6.514	8.126	3.277	13.011	3.417	6.118	5.759	3.367	9.883	2.641	6.445	8.028	3.17	8.685	3.537	8.553	11.095	4.75	10.043	3.027	6.857	6.957	3.003	9.41
2010-09-01	101109873	XM_012170601, XM_012170610, XM_012170619	septin 10	3:62298706-62333215:-1	11.41	5.511	4.869	8.708	5.413	10.543	4.395	3.924	6.49	11.424	10.925	6.68	4.659	6.009	5.101	8.677	5.609	2.649	5.466	5.544	13.011	8.483	4.627	9.401	6.952	11.006	7.679	8.307	7.466	9.275
ATG4A	ENSOARG00000018450	ENSOART00000020081.1, XM_004022431, XM_012107571, XM_012107572, XM_012107573, XM_012107574	autophagy related 4A, cysteine peptidase	X:120079085-120119947:-1	13.019	6.397	5.373	8.158	8.667	10.408	5.759	5.038	10.223	8.878	10.94	6.913	3.955	7.34	5.929	9.451	5.683	6.139	11.599	8.03	12.405	7.462	5.537	10.778	8.692	11.533	6.459	5.548	9.542	9.152
COMTD1	101103946	XM_004021503	catechol-O-methyltransferase domain containing 1	25:30861835-30864078:-1	8.156	11.507	7.817	5.837	4.359	12.043	13.022	9.016	10.08	12.032	8.615	7.475	5.082	4.656	2.736	12.586	11.474	10.581	8.568	10.9	11.706	11.591	11.617	9.553	12.832	10.839	11.931	7.974	8.473	10.768
TRMT10A	ENSOARG00000015119	ENSOART00000016456.1, XM_004009677, XM_012179626, XM_012179627	tRNA methyltransferase 10 homolog A (S. cerevisiae)	6:25149319-25183470:1	12.203	6.356	6.85	12.213	5.382	9.115	6.29	6.989	10.883	5.846	13.025	5.899	6.596	12.318	4.761	7.774	4.158	5.964	8.585	4.992	9.246	6.431	7.918	10.687	4.859	9.377	5.572	6.221	11.759	5.759
OPHN1	ENSOARG00000014600	ENSOART00000015900.1, XM_012106830, XM_012106831, XM_012106832, XM_012106833, XM_012106834, XM_012106835, XM_012106836, XM_012106837, XM_012106838	oligophrenin 1	X:57298829-57906217:-1	6.165	4.128	2.832	3.586	2.625	11.456	5.969	5.604	6.108	5.194	7.404	3.617	2.983	3.818	2.899	13.03	7.494	6.121	8.006	4.946	9.061	5.855	4.668	6.107	4.271	9.36	5.61	4.884	5.727	5.061
CDKN2D	ENSOARG00000016628	ENSOART00000018107.1, XM_004009297	cyclin-dependent kinase inhibitor 2D (p19, inhibits CDK4)	5:12754376-12757211:-1	8.931	7.433	3.595	5.301	13.036	7.428	4.44	1.968	4.457	5.046	7.882	5.443	2.275	6.875	8.106	5.074	3.618	2.523	3.982	5.906	7.541	4.842	3.65	4.901	7.876	9.82	6.596	4.417	4.931	8.794
GID4	ENSOARG00000001139	ENSOART00000001219.1, XM_012186738	GID complex subunit 4	11:34047242-34061854:-1	12.353	5.645	6.069	12.532	9.415	11.473	5.063	8.653	11.736	12.689	10.502	4.079	2.907	6.986	6.369	10.21	6.265	5.606	9.58	8.539	9.895	6.283	10.148	13.038	9.854	10.27	5.444	5.376	10.313	10.195
FAM135A	ENSOARG00000011336	ENSOART00000012327.1, XM_004011576, XM_004011577, XM_012183395, XM_012183396, XM_012183397, XM_012183398	family with sequence similarity 135, member A	9:3679601-3762561:-1	11.392	7.419	5.636	10.987	10.84	10.568	6.509	6.245	9.677	11.732	7.9	5.391	3.282	8.194	8.045	13.04	10.075	8.341	11.256	11.088	10.23	7.205	7.453	7.931	8.106	8.727	5.307	4.472	6.681	7.79
AHSA2	101119030	XM_012168789	AHA1, activator of heat shock 90kDa protein ATPase homolog 2 (yeast)	3:46739565-46758244:-1	13.045	5.911	3.981	5.886	5.227	8.198	6.632	3.947	5.606	8.37	7.057	5.062	2.94	5.301	4.033	6.447	4.713	2.31	6.412	4.721	9.37	6.005	3.661	7.928	7.189	9.996	8.151	4.202	7.359	6.835
TPK1	ENSOARG00000018504	ENSOART00000020141.1, XM_012177322, XM_012177323	thiamin pyrophosphokinase 1	4:107175791-107472313:-1	7.036	6.555	4.687	4.159	5.529	8.729	9.3	5.399	7.632	10.384	8.148	6.573	5.903	4.248	3.306	11.03	8.246	6.283	8.6	13.047	9.088	10.061	6.899	9.277	10.302	10.02	8.704	7.663	6.435	10.482
ENSOARG00000018552	ENSOARG00000018552	ENSOART00000020193.1	no description available	JH922687.1:8-6073:-1	1.997	7.496	7.516	1.798	7.424	1.427	7.817	8.528	1.349	13.05	2.908	8.048	5.933	1.251	5.857	1.63	6.085	5.376	1.539	7.119	2.083	8.207	10.338	2.554	7.149	1.564	9.096	7.413	1.273	9.803
DCAF4	ENSOARG00000000227	ENSOART00000000246.1, XM_012181991	DDB1 and CUL4 associated factor 4	7:81359116-81390631:1	9.633	6.771	8.102	8.47	6.684	7.657	6.117	9.689	13.059	7.773	11.008	7.579	7.731	8.2	4.901	10.308	6.967	8.713	10.907	8.278	10.46	7.938	12.05	11.611	8.067	10.932	7.08	9.635	11.364	10.012
DUSP23	ENSOARG00000007833	ENSOART00000008526.1, XM_004002652	dual specificity phosphatase 23	1:109113201-109115361:1	10.904	7.043	7.212	5.785	8.111	12.315	13.059	6.41	9.333	11.351	11.864	7.903	4.778	3.878	6.319	9.717	4.191	5.283	4.552	10.437	9.414	10.942	7.762	7.14	11.011	10.943	11.087	7.029	6.857	11.209
DTWD1	ENSOARG00000020998	ENSOART00000022876.1, XM_012181606, XM_012181607	DTW domain containing 1	7:57672940-57688757:-1	12.343	3.904	3.208	7.053	3.674	9.659	4.546	9.244	12.38	7.358	13.063	5.139	3.501	6.297	2.533	10.253	6.695	7.861	11.241	8.489	12.625	4.991	7.326	10.634	7.162	11.872	3.691	5.576	10.737	6.904
ENSOARG00000015927	ENSOARG00000015927	ENSOART00000017345.1	no description available	JH923097.1:15-14441:-1	10.951	9.492	7.791	8.27	9.628	10.69	10.158	8.877	9.28	12.378	13.022	8.695	6.049	6.031	5.484	10.173	6.793	7.86	8.043	10.714	13.063	12.495	10.627	11.807	11.883	12.421	10.587	6.977	8.58	12.594
SLC25A37	ENSOARG00000010083	ENSOART00000010971.1, NM_001127287	solute carrier family 25 (mitochondrial iron transporter), member 37	2:41987138-42043433:-1	10.563	7.555	5.791	6.973	7.908	11.04	8.192	6.286	6.812	11.343	13.064	11.957	5.952	4.076	5.194	7.709	5.277	4.207	3.961	8.053	9.128	5.986	6.657	6.158	6.882	11.611	10.243	4.815	7.217	11.183
ENSOARG00000002197	ENSOARG00000002197	ENSOART00000002369.1	no description available	AMGL01122942.1:21-3672:1	7.154	11.366	10.567	9.979	4.448	7.973	10.588	9.747	9.075	5.956	9.17	11.845	11.493	9.304	5.034	6.94	8.264	9.594	13.067	5.175	6.112	7.403	7.804	9.016	5.146	8.51	9.12	8.752	9.883	6.195
GMEB1	ENSOARG00000002809	ENSOART00000003046.1	glucocorticoid modulatory element binding protein 1	2:237636957-237661896:-1	6.236	10.702	11.683	7.55	7.556	6.947	10.816	12.746	7.322	7.919	8.254	11.431	12.809	8.247	7.053	7.249	8.598	11.732	7.848	6.858	7.008	11.171	10.978	7.634	6.989	7.84	11.371	13.068	7.755	9.047
C24H7orf26	101106388	XM_012104646	chromosome 24 open reading frame, human C7orf26	24:38295957-38306877:1	7.546	6.954	5.935	4.831	8.538	7.174	5.833	5.436	5.977	13.072	10.095	7.768	5.197	4.936	6.957	6.316	7.267	4.554	5.11	8.465	8.314	6.587	8.355	6.838	6.541	8.164	6.722	5.664	4.606	9.102
PHF21B	ENSOARG00000019312	ENSOART00000021031.1, XM_012176177	PHD finger protein 21B	3:219384702-219466427:-1	5.361	0.049	0.052	13.079	0.045	0.192	0.227	0.16	0.196	0.043	0.135	0.093	0.093	0.099	0.162	0.118	0.048	0.059	0.155	0.026	0.109	0.053	0.031	0.162	0.081	0.05	0.074	0.114	0.11	0.089
ACTG2	ENSOARG00000012108	ENSOART00000013168.1	actin gamma 2, smooth muscle	3:95660587-95675679:1	0.854	1.167	0.517	0.852	3.275	3.556	4.878	7.235	6.805	3.822	0.917	0.656	0.984	1.241	2.32	6.661	13.089	12.986	12.166	4.929	9.968	11.51	12.713	12.234	4.5	5.761	8.185	6.743	5.79	1.906
TIFA	ENSOARG00000000306	ENSOART00000000325.1	TRAF interacting protein with forkhead associated domain	6:13372584-13373144:1	2.554	1.032	1.872	0.72	0.683	4.657	2.824	5.07	1.597	4.617	2.043	1.917	13.094	2.92	0.478	1.392	1.957	5.674	1.838	1.773	2.247	1.215	1.472	1.132	1.269	1.727	0.52	1.654	1.203	0.948
ENSOARG00000008307	ENSOARG00000008307	ENSOART00000009039.1	no description available	4:47824556-47824774:-1	0	1.486	3.906	0	6.59	0.313	1.594	3	0	5.715	0.743	0	0	0	1.846	0.428	0	0	0	0	0.842	1.537	13.109	0	0.113	0	1.892	0	0.594	0
TMEM52	ENSOARG00000001656	ENSOART00000001783.1, XM_012187436	transmembrane protein 52	12:48886797-48888296:1	5.584	5.126	5.038	5.184	6.892	8.57	7.961	3.892	4.42	9.812	7.161	7.973	3.866	2.576	6.605	6.585	6.195	3.092	3.858	13.11	7.325	8.47	8.174	6.214	9.915	7.739	9.354	4.753	3.153	9.292
PGF	ENSOARG00000001545	ENSOART00000001660.1, XM_012182055	placental growth factor	7:83106667-83119573:-1	0.143	0.961	2.044	1.797	5.142	0.358	1.818	2.92	13.111	0.184	0.051	0.272	0.398	1.598	0	0.712	0.422	2.294	2.889	0.114	0.342	0.907	3.858	6.194	1.094	0.052	0.533	2.401	4.491	0.405
ENSOARG00000002935	ENSOARG00000002935	ENSOART00000003174.1	no description available	JH924666.1:560-1828:-1	9.163	8.796	6.273	6.742	10.622	3.565	11.432	10.288	2.722	13.132	3.653	9.96	6.661	3.186	11.486	3.217	8.981	8.555	2.583	11.61	3.713	10.729	11.366	3.422	8.743	2.3	8.525	7.17	2.385	11.743
FECH	ENSOARG00000005202	ENSOART00000005676.1, XM_012103782	ferrochelatase	23:57001984-57032732:-1	9.846	11.758	8.338	5.643	8.399	9.311	10.672	9.036	6.547	10.402	8.443	8.809	6.567	4.833	5.19	9.883	11.136	10.054	8.856	10.663	10.841	13.142	10.521	7.071	12.186	10.614	11.235	11.127	7.257	10.012
TUBGCP4	ENSOARG00000009985	ENSOART00000010869.1, XM_004017929, XM_012098888	tubulin, gamma complex associated protein 4	18:54079006-54120839:1	11.27	5.228	2.877	3.77	6.943	10.951	5.211	4.26	5.682	10.781	13.142	6.698	2.383	4.66	4.679	9.42	5.638	3.257	5.958	8.882	9.623	6.26	5.043	5.785	7.871	11.283	5.796	3.29	4.653	8.238
CD96	ENSOARG00000019179	ENSOART00000020885.1, XM_004002903	CD96 molecule	1:174690599-174793852:1	6.352	3.561	1.739	2.071	2.637	10.162	3.624	1.65	1.89	3.549	7.459	3.252	1.191	1.64	3.604	13.162	4.109	1.708	3.509	3.431	4.608	2.357	1.336	1.714	1.354	3.868	1.459	1.152	0.911	1.853
RANBP10	ENSOARG00000003145	ENSOART00000003409.1, XM_012189974	RAN binding protein 10	14:34608928-34663664:-1	6.822	7.623	7.043	7.236	8.159	7.358	9.096	12.256	10.378	8.717	6.824	4.187	5.739	9.178	6.886	8.503	8.269	10.138	13.162	7.217	9.549	10.445	12.495	10.702	8.405	9.749	11.048	11.341	9.735	8.048
SCYL3	ENSOARG00000011451	ENSOART00000012454.1, XM_004013679, XM_012187247, XM_012187249	SCY1-like 3 (S. cerevisiae)	12:35655866-35686385:-1	10.207	6.231	7.06	7.562	7.342	13.166	9.022	9.947	11.53	10.098	11.668	5.866	5.568	7.425	6.917	11.406	5.936	7.12	10.022	7.488	11.999	8.051	8.264	9.989	8.802	11.088	7.119	7.035	9.516	8.186
ADRB2	ENSOARG00000014352	ENSOART00000015626.1, NM_001130154	adrenoceptor beta 2, surface	5:57750722-57751970:1	4.012	13.172	10.103	6.529	5.206	4.93	8.309	5.462	9.492	3.772	3.328	12.072	6.378	5.374	2.888	4.831	3.213	1.119	4.086	4.709	5.277	7.884	3.511	4.177	5.829	6.824	11.742	7.912	9.14	3.73
CASP8AP2	ENSOARG00000012409	ENSOART00000013495.1, ENSOART00000013497.1	caspase 8 associated protein 2	8:47506669-47526850:-1	11.584	2.665	2.424	5.648	4.406	9.336	2.97	3.792	7.653	6.67	13.172	2.028	2.175	7.034	3.466	7.279	2.691	3.025	6.733	4.501	9.266	3.211	3.659	6.739	4.771	11.122	2.381	3.521	6.542	6.27
ZNF45	ENSOARG00000008991	ENSOART00000009793.1	zinc finger protein 45	14:51173004-51178094:1	9.573	4.492	6.286	9.002	4.302	9.984	7.14	9.399	13.184	7.029	10.202	4.291	5.722	11.002	4.023	7.46	5.061	6.14	10.731	4.42	8.856	5.791	6.894	9.235	4.801	10.119	3.86	5.166	10.03	5.041
RETSAT	ENSOARG00000020479	ENSOART00000022304.1	retinol saturase	3:57047396-57061814:-1	13.186	10.314	9.015	8.328	6.947	11.236	9.477	7.534	7.743	9.2	12.912	10.523	9.431	8.449	5.044	9.21	6.199	7.12	8.8	8.183	9.676	8.94	7.772	7.594	7.213	10.452	9.194	7.623	6.558	8.34
CEP70	ENSOARG00000007346	ENSOART00000007996.1, ENSOART00000007998.1, XM_012102549, XM_012102556, XM_012102560, XM_012102567, XM_012102573, XM_012102581, XM_012102592, XM_012102599, XM_012102605, XM_012102611	centrosomal protein 70kDa	1:248621969-248685659:1	10.252	4.741	2.865	6.491	4.578	10.62	3.359	3.048	7.38	6.546	13.082	5.857	2.919	9.198	3.376	7.457	3.008	2.745	7.2	4.811	11.61	6.208	4.143	10.103	6.766	13.19	6.513	3.3	8.599	7.713
NLE1	ENSOARG00000007227	ENSOART00000007863.1, XM_012185317	notchless homolog 1 (Drosophila)	11:14546259-14555039:1	2.895	3.458	4.632	5.856	2.57	3.478	4.802	7.3	13.2	4.231	3.999	2.977	2.091	3.041	1.186	3.701	1.701	2.523	4.838	3.737	3.989	4.127	7.85	7.091	3.424	5.933	5.237	4.405	7.438	5.229
HDAC8	ENSOARG00000017776	ENSOART00000019341.1, XM_012106917, XM_012106918	histone deacetylase 8	X:61691910-61804456:-1	5.264	3.451	4.967	7.796	4.606	5.198	4.161	6.255	11.158	6.913	5.553	3.73	5.865	13.203	4.185	3.786	3.089	4.149	8.091	3.392	5.568	4.579	5.641	7.089	4.486	5.282	3.979	5.764	6.972	3.973
CASC3	ENSOARG00000013239	ENSOART00000014396.1, ENSOART00000014397.1	CASC3 exon junction complex subunit	11:40011265-40030969:1	7.534	9.747	9.389	6.26	8.307	6.62	10.423	13.205	7.929	12.467	8.861	10.162	8.932	6.498	7.808	6.427	9.513	9.592	6.236	9.427	7.057	10.468	12.652	8.735	10.402	7.62	8.22	11.68	7.307	11.228
ZRANB1	ENSOARG00000010740	ENSOART00000011685.1, XM_004020257, XM_004020258, XM_012103113, XM_012103114	zinc finger, RAN-binding domain containing 1	22:43383750-43423178:1	13.205	6.193	7.903	10.786	9.47	12.82	5.666	7.225	11.261	8.531	11.917	5.212	5.115	10.348	6.373	11.415	9.233	8.735	12.046	8.059	10.388	6.162	7.8	11.162	6.917	11.412	7.401	8.809	11.486	9.439
INO80B	ENSOARG00000012669	ENSOART00000013769.1, XM_012173677	INO80 complex subunit B	3:96252473-96255177:1	7.715	8.978	5.06	5.616	10.585	8.391	7.907	6.866	6.319	12.131	9.956	7.409	4.762	5.149	8.981	7.916	8.309	8.113	5.288	11.903	7.382	9.535	9.685	6.424	13.208	6.876	9.37	5.342	5.138	11.163
TAF6	ENSOARG00000017656	ENSOART00000019216.1, XM_012104559	TAF6 RNA polymerase II, TATA box binding protein (TBP)-associated factor, 80kDa	24:36257900-36262393:1	4.193	8.304	5.045	2.274	8.547	3.933	8.082	5.483	3.218	13.213	5.366	10.156	4.223	2.784	6.064	3.879	7.561	7.034	3.321	9.134	4.153	8.936	8.596	4	10.374	4.296	9.588	6.603	2.615	10.475
SNTB1	101117171	XM_012184306	syntrophin, beta 1 (dystrophin-associated protein A1, 59kDa, basic component 1)	9:94348740-94490832:-1	9.66	5.915	2.664	2.557	4.318	11.158	5.618	2.403	2.292	10.155	13.215	8.66	3.272	3.617	10.752	7.587	5.762	3.381	2.987	5.548	2.833	2.383	1.991	1.69	2.456	7.105	6.367	2.454	3.126	6.92
RNF8	ENSOARG00000014556	ENSOART00000015847.1, ENSOART00000015849.1, XM_012100580, XM_012100581	ring finger protein 8, E3 ubiquitin protein ligase	20:11319241-11345230:1	12.67	2.929	5.347	10.06	6.442	8.97	3.629	8.883	12.181	8.77	13.217	4.159	5.154	8.637	4.668	7.786	4.612	7.582	11.186	9.249	9.658	4.339	6.327	9.721	8.551	11.289	4.05	6.92	10.923	8.807
DMAC2	ENSOARG00000007321	ENSOART00000007964.1	distal membrane arm assembly complex 2	14:49597675-49600878:1	9.036	5.775	7.855	7.078	4.898	8.347	9.513	10.499	9.514	7.797	10.486	7.062	6.05	6.145	4.045	10.322	13.218	8.708	10.31	8.646	10.399	10.229	3.812	7.894	5.668	13.079	9.126	8.093	7.833	7.584
KLF5	ENSOARG00000015505	ENSOART00000016867.1, ENSOART00000016868.1, XM_004012185, XM_004012186	Kruppel-like factor 5 (intestinal)	10:48247065-48265731:1	0.3	3.207	3.357	1.561	4.071	0.487	4.171	6.872	1.511	1.097	1.517	7.63	10.935	4.449	13.22	0.371	8.557	7.004	2.277	2.767	0.532	6.977	3.341	1.491	4.174	0.388	8.098	7.494	1.777	2.86
AP4E1	ENSOARG00000020979	ENSOART00000022857.1, ENSOART00000022858.1, XM_004010615	adaptor-related protein complex 4, epsilon 1 subunit	7:56402350-56472990:-1	13.221	5.695	6.258	9.426	8.249	11.665	6.5	8.266	12.504	9.508	12.653	6.808	6.246	10.538	7.443	10.078	6.951	6.6	12.301	8.117	11.623	7.508	8.378	11.975	7.852	12.967	6.76	7.096	11.871	10.309
HS2ST1	101117803	XM_012175327, XM_012175332, XM_012175335	heparan sulfate 2-O-sulfotransferase 1	1:63425307-63578707:1	1.905	2.169	3.298	5.827	2.66	4.773	3.843	8.124	13.223	4.939	3.962	1.739	6.137	9.283	2.715	3.969	3.092	5.445	9.422	2.736	2.802	2.635	4.023	5.272	4.067	5.084	1.817	3.857	6.964	4.141
ZNF414	ENSOARG00000004095	ENSOART00000004453.1, XM_004008570	zinc finger protein 414	5:14796774-14800925:-1	5.282	10.067	7.456	4.214	11.088	3.762	8.991	8.393	3.611	12.283	4.929	9.57	7.497	4.037	11.428	3.389	9.195	11.135	3.719	11.284	5.16	12.148	11.317	5.987	13.237	4.548	10.274	8.082	3.489	10.643
MAP11	ENSOARG00000017422	ENSOART00000018965.1	microtubule associated protein 11	24:36130220-36133391:1	8.39	10.057	9.029	8.1	12.587	8.332	8.889	9.545	8.392	13.24	9.506	9.653	8.148	8.116	12.332	8.233	8.498	10.131	7.896	10.922	7.191	11.254	12.15	9.32	11.305	7.145	9.834	9.396	7.389	9.34
MYLIP	ENSOARG00000012390	ENSOART00000013472.1, XM_004019124	myosin regulatory light chain interacting protein	20:39929921-39950723:-1	2.08	1.42	1.007	1.27	0.501	8.574	2.422	0.938	2.205	1.787	3.436	2.151	0.617	0.986	0.3	13.24	4.848	1.374	3.539	2.43	3.411	1.977	0.99	3.048	3.332	2.478	0.967	0.553	1.199	1.936
KIAA0319L	ENSOARG00000019494	ENSOART00000021232.1, XM_012095964	KIAA0319-like ortholog	1:10196368-10300600:-1	9.627	5.88	5.36	8.222	7.11	10.314	5.896	7.551	10.31	9.285	13.242	7.414	6.846	10.423	6.38	11.779	8.824	7.698	10.892	9.34	11.374	7.075	7.266	10.989	9.626	11.582	7.176	6.807	10.428	9.374
ENSOARG00000010924	ENSOARG00000010924	ENSOART00000011880.1	exosome component 6	14:1197240-1197629:1	12.622	7.961	3.245	12.781	5.242	6.602	12.603	5.538	4.928	13.243	6.099	4.667	2.006	2.695	5.94	7.151	2.654	3.631	3.001	5.042	4.355	5.367	7.236	3.737	6.271	7.264	6.789	1.454	5.475	7.291
ATG13	ENSOARG00000003799	ENSOART00000004130.1, XM_004016441, XM_004016443, XM_012096347, XM_012096348, XM_012096349, XM_012096350, XM_012096352	autophagy related 13	15:74812518-74857323:1	10.784	7.716	6.402	6.78	10.693	10.543	9.384	7.741	7.499	13.245	10.378	8.734	5.187	6.798	9.801	9.572	12.359	10.855	8.676	11.401	9.547	10.053	7.889	8.698	10.324	10.418	10.431	7.397	7.514	9.978
NIPBL	ENSOARG00000010580	ENSOART00000011529.1, XM_004017042, XM_012097044, XM_012097045, XM_012097046	Nipped-B homolog (Drosophila)	16:37087127-37283828:-1	9.933	7.84	8.682	7.378	9.371	9.694	7.876	11.247	8.003	13.246	9.929	9.332	10.147	8.406	9.133	8.465	9.048	9.698	8.804	9.712	7.575	8.243	9.015	6.838	8.875	8.618	7.666	9.068	6.85	11.414
LRRC42	ENSOARG00000006742	ENSOART00000007330.1	leucine rich repeat containing 42	1:28241431-28255637:1	9.183	5.504	5.157	5.212	10.625	10.182	5.511	5.926	8.115	13.25	10.075	4.752	2.045	5.923	6.878	8.631	4.857	4.205	8.293	9.549	10.397	5.623	7.295	8.878	10.236	10.014	7.035	7.056	8.289	12.383
LOC105614729	105614729	XM_012174353, XM_012174354, XM_012174355, XM_012174356	proline-rich protein 36-like	3:137061714-137064521:1	2.693	2.263	2.317	1.626	2.83	7.47	13.251	6.815	4.208	11.056	3.513	4.784	3.936	2.619	2.744	8.494	10.867	9.705	5.703	9.267	4.322	7.035	7.228	5.124	6.035	3.901	5.223	3.338	3.535	4.365
DET1	ENSOARG00000010954	ENSOART00000011913.1, XM_012098440	de-etiolated homolog 1 (Arabidopsis)	18:18702712-18728030:-1	12.86	10.816	8.51	7.621	8.441	8.814	7.871	12.163	10.324	11.457	13.117	8.109	6.655	5.905	4.369	11.41	8.128	8.065	8.764	11.031	11.721	11.964	13.253	10.322	12.052	11.072	9.127	8.825	7.773	11.883
NAT9	ENSOARG00000012163	ENSOART00000013228.1, XM_004013513, XM_012186557, XM_012186558, XM_012186559, XM_012186560, XM_012186561, XM_012186562, XM_012186563, XM_012186564	N-acetyltransferase 9 (GCN5-related, putative)	11:55632493-55635604:1	7.408	4.746	2.507	6.309	6.97	11.217	5.793	5.997	9.635	10.048	11.977	5.699	2.829	8.676	7.128	10.734	6.96	6.31	7.865	11.572	6.863	3.659	4.187	7.863	8.333	13.256	5.688	3.989	6.741	10.669
FBXO45	ENSOARG00000020347	ENSOART00000022157.1, XM_012108033	F-box protein 45	1:189337476-189352654:1	9.617	8.446	9.916	11.944	4.067	13.259	7.833	7.903	8.886	4.959	8.834	8.125	8.88	6.484	2.439	10.657	8.705	5.765	8.177	4.003	8.805	8.221	8.92	11.008	6.199	10.28	8.537	8.718	12.744	5.618
DNAL4	ENSOARG00000016073	ENSOART00000017505.1, XM_004006998	dynein, axonemal, light chain 4	3:214381411-214392764:-1	10.896	7.282	10.18	6.942	10.591	6.457	12.027	9.15	6.469	7.219	9.401	8.305	4.506	7.319	9.427	6.849	8.25	12.156	11.486	8.781	12.519	11.123	12.187	9.222	11.025	13.263	7.995	9.545	6.306	12.128
KLHL8	ENSOARG00000004639	ENSOART00000005051.1, XM_004009978	kelch-like family member 8	6:101680651-101717294:-1	9.611	4.339	2.666	4.212	7.211	8.768	4.82	3.879	5.166	11.027	8.049	4.991	1.653	3.765	6.409	9.071	10.297	4.995	6.77	12.464	7.141	5.809	4.35	6.163	13.265	6.315	3.557	2.613	4.425	9.35
TAF5L	101102368	XM_004023688	TAF5-like RNA polymerase II, p300/CBP-associated factor (PCAF)-associated factor, 65kDa	25:914331-948790:-1	10.891	13.27	12.053	9.166	9.205	10.693	11.246	12.181	10.432	11.939	13.132	12.746	7.673	8.649	8.006	9.113	6.55	7.42	8.854	8.26	10.885	12.705	10.854	9.073	8.515	12.025	12.603	11.036	8.141	10.184
PDP2	ENSOARG00000011098	ENSOART00000012071.1	pyruvate dehyrogenase phosphatase catalytic subunit 2	14:33942190-33943785:1	8.741	3.058	4.951	5.402	4.885	12.951	5.424	8.156	9.337	5.693	10.963	1.889	4.687	5.138	1.019	11.623	1.778	4.32	5.904	4.783	11.219	6.434	9.94	9.663	7.633	12.952	4.075	9.928	13.272	6.914
FRMD8	ENSOARG00000014654	ENSOART00000015953.1, XM_012102348	FERM domain containing 8	21:42893639-42915194:1	8.44	7.1	6.166	6.319	7.886	8.322	6.824	6.456	7.268	13.275	10.608	5.926	3.65	5.773	6.89	7.756	6.335	7.323	7.879	8.422	8.643	7.486	9.538	7.945	7.606	10.022	8.313	6.218	8.165	9.252
LIMD2	ENSOARG00000013388	ENSOART00000014558.1	LIM domain containing 2	11:47401902-47402623:-1	9.638	5.841	4.499	6.411	5.285	7.844	4.453	5.228	2.654	8.586	13.28	7.538	3.954	3.03	11.647	7.765	4.386	3.681	2.842	6.619	5.738	4.238	4.044	2.724	5.184	6.772	7.69	3.842	3.229	8.197
AUH	ENSOARG00000007832	ENSOART00000008524.1, XM_012115692	AU RNA binding protein/enoyl-CoA hydratase	2:26050457-26248179:-1	13.282	9.884	5.441	7.448	6.294	11.031	6.943	6.617	9.684	5.328	9.032	5.338	3.767	3.819	2.205	10.387	8.992	6.616	9.374	6.391	7.479	5.331	4.237	6.49	5.678	9.779	8.863	6.752	6.705	6.641
CWF19L2	ENSOARG00000010043	ENSOART00000010937.1, XM_012095380	CWF19-like 2, cell cycle control (S. pombe)	15:15552861-15704633:1	13.286	4.388	3.009	6.636	5.243	11.396	3.449	4.709	8.2	7.308	11.882	4.571	3.323	7.539	5.044	9.562	3.457	5.183	8.759	5.906	12.958	6.092	6.062	11.331	7.205	12.59	4.289	3.622	8.85	7.68
LOC101108152	101108152	XM_012189240	sorting nexin-10-like	13:73105696-73108651:-1	2.377	5.079	7.467	5.253	0.495	1.956	3.164	6.846	7.73	0	0.514	7.048	13.286	9.803	1.933	3.81	10.937	13.16	7.688	2.561	0.311	1.647	0.713	3.924	1.755	2.697	3.166	7.737	5.86	0.758
LOC105602050	105602050	XM_012094942	ATP-dependent RNA helicase DDX19B	14:1145249-1167066:-1	9.066	11.642	12.075	10.037	11.448	8.27	11.648	12.844	13.286	8.729	9.016	11.912	11.338	10.613	10.924	7.343	10.498	10.096	9.424	8.484	7.967	11.651	10.851	8.054	7.531	7.664	9.93	9.404	9.805	10.195
PLXDC1	ENSOARG00000010290	ENSOART00000011193.1, XM_004012833, XM_012186021, XM_012186023	plexin domain containing 1	11:39166703-39210696:-1	0.763	0.833	0.906	0.464	0.772	0.588	0.288	0.326	0.341	2.782	5.829	1.398	0.829	0.564	1.041	0.94	0.241	0.418	2.152	4.857	1.465	1.036	0.68	1.872	3.431	3.885	0.918	0.503	1.134	13.297
MINPP1	ENSOARG00000013967	ENSOART00000015206.1, XM_004020010, XM_012102485, XM_012102486	multiple inositol-polyphosphate phosphatase 1	22:8934771-8969814:1	9.277	3.323	4.115	7.647	6.329	5.662	3.727	7.141	11.054	8.546	8.901	5.296	3.365	4.61	3.96	6.145	5.316	4.845	8.23	7.508	8.857	5.856	9.576	13.315	8.453	9.196	5.666	4.266	9.567	8.537
CNN3	101108091	XM_004002212	calponin 3, acidic	1:71196919-71226368:-1	5.85	2.456	2.664	2.002	7.259	2.096	0	0.683	1.112	6.487	9.003	3.932	3.32	3.906	13.317	0.328	0.657	0.716	1.171	3.75	4.756	2.692	1.839	2.724	5.078	6.805	4.401	2.793	3.219	6.766
LOC101121080	101121080	XM_012108199	sodium- and chloride-dependent glycine transporter 1-like	JH923143.1:9441-15293:1	12.683	5.467	13.318	6.377	0	7.858	7.539	8.064	9.781	0	12.444	5.037	10.549	6.614	4.586	9.757	0	8.568	5.684	4.704	5.131	2.831	3.368	2.438	10.739	4.332	7.339	10.238	7.345	1.895
TRMT1	ENSOARG00000009397	ENSOART00000010233.1, XM_012179153	tRNA methyltransferase 1 homolog (S. cerevisiae)	5:10545220-10554294:1	8.531	8.432	8.337	9.333	5.671	7.39	7.686	10.332	13.32	8.37	9.688	7.45	6.302	5.077	2.54	7.758	5.829	6.056	5.958	6.485	8.322	9.061	10.805	9.836	6.514	9.85	8.671	9.562	11.109	8.118
TRIM39	ENSOARG00000013795	ENSOART00000015011.1	tripartite motif containing 39	20:27531825-27542124:-1	9.98	12.476	12.227	12.699	12.229	8.815	10.507	10.768	10.194	11.085	9.626	11.202	9.464	10.494	9.902	9.396	9.832	9.58	10.133	9.163	11.187	11.063	12.478	13.322	8.836	8.072	10.062	11.133	12.579	8.488
DTX2	ENSOARG00000013982	ENSOART00000015229.1, XM_012104488	deltex 2, E3 ubiquitin ligase	24:34370801-34404016:1	5.666	7.678	7.89	4.012	9.132	5.747	9.142	8.696	4.794	13.332	5.851	7.395	6.961	4.475	7.744	5.06	6.82	7.954	4.724	10.635	6.337	8.333	10.906	5.536	10.451	5.062	7.598	8.075	4.631	10.327
ENSOARG00000012079	ENSOARG00000012079	ENSOART00000013136.1	no description available	3:8633742-8637580:1	5.221	6.677	2.341	3.945	9.588	5.286	4.637	9.106	4.72	4.276	5.306	2.279	0.462	1.905	1.903	6.053	6.827	3.535	6.408	5.515	5.732	6.467	13.351	8.842	6.151	3.065	2.541	2.142	2.051	4.28
ZNF576	ENSOARG00000008799	ENSOART00000009580.1, XM_012190491	zinc finger protein 576	14:50895072-50899291:1	10.183	5.96	4.756	6.321	8.544	12.524	9.65	8.56	11.54	11.136	13.353	7.184	3.828	8.791	5.576	12.826	8.714	9.498	10.406	11.733	13.224	11.628	12.89	12.638	11.68	10.557	7.25	6.754	9.408	9.939
LOC101121151	101121151	XM_012106991, XM_012106992	putative small nuclear ribonucleoprotein polypeptide E-like protein 1	X:70595111-70604946:-1	0	0	0	0	13.358	0	0	0	6.218	0	0	0	0	0	0	0	0	0	0	0	0	0	0	0	0	0	0	0	0	0
RPUSD2	ENSOARG00000020235	ENSOART00000022033.1	RNA pseudouridine synthase domain containing 2	7:33182683-33186686:1	11.352	5.299	6.237	6.175	10.164	10.165	5.492	8.076	9.137	11.441	13.364	3.41	5.034	4.518	6.468	9.755	4.906	6.747	7.758	10.734	9.424	8.187	8.211	8.447	9.907	11.796	6.026	7.854	8.782	9.774
EPC2	ENSOARG00000009618	ENSOART00000010472.1, XM_012137999	enhancer of polycomb homolog 2 (Drosophila)	2:159601650-159730860:-1	12.139	6.54	6.009	8.229	5.715	13.366	6.398	8.66	11.359	7.637	12.169	6.685	7.202	10.535	6.921	12.243	4.39	6.507	11.444	5.826	7.86	5.725	5.357	7.972	4.977	10.955	4.708	5.723	8.828	6.225
EEF1AKNMT	ENSOARG00000013736	ENSOART00000014949.1	eEF1A lysine and N-terminal methyltransferase	12:37342916-37359117:1	6.335	7.783	9.237	6.703	5.05	5.007	6.278	11.463	10.015	6.599	7.409	7.489	7.585	4.864	1.605	6.661	5.545	4.958	5.434	6.555	6.513	9.73	12.583	9.221	6.859	8.563	11.079	13.367	10.11	7.557
SC5	ENSOARG00000002154	ENSOART00000002325.1, NM_001009406	cathelin-related prepropeptide	19:51587771-51589754:-1	0.982	1.016	0.122	0.621	0	12.901	10.548	9.773	8.632	3.525	5.679	1.568	3.626	2.935	0.108	13.374	7.814	6.262	12.832	2.683	2.922	2.066	1.301	2.226	0.661	6.185	4.043	6.787	5.314	1.072
BCL2L12	ENSOARG00000013342	ENSOART00000014513.1, XM_012190706, XM_012190707, XM_012190708	BCL2-like 12 (proline rich)	14:55097685-55104315:1	7.241	7.091	5.246	5.471	7.557	7.866	6.752	8.784	8.637	8.645	8.241	6.937	11.764	13.384	6.354	6.041	6.238	5.996	6.788	7.524	9.393	7.606	6.158	7.86	8.235	8.061	7.803	5.259	5.999	9.429
ACTR8	ENSOARG00000015777	ENSOART00000017177.1, ENSOART00000017179.1	actin related protein 8	19:47025797-47041312:1	11.1	6.008	6.233	7.929	9.446	13.388	6.036	7.759	12.102	10.694	12.549	6.752	4.841	9.818	7.437	12.196	8.496	6.937	9.016	8.63	10.387	6.229	7.906	9.768	8.996	12.756	6.91	6.344	9.448	10.712
FER	ENSOARG00000018799	ENSOART00000020478.1, XM_012179031, XM_012179032, XM_012179033, XM_012179034, XM_012179035, XM_012179036	fer (fps/fes related) tyrosine kinase	5:105085746-105465460:1	10.984	5.962	3.797	4.354	6.693	12.345	5.958	4.288	6.313	11.095	12.877	7.01	3.359	5.111	5.287	10.404	4.746	3.479	7.153	7.39	12.175	7.39	4.373	6.743	7.18	13.388	7.384	4.336	6.141	8.922
C12orf65	ENSOARG00000005214	ENSOART00000005684.1	chromosome 12 open reading frame 65	17:51912906-51915607:-1	11.262	5.389	5.684	6.806	11.332	11.193	6.741	6.011	7.728	9.363	12.774	4.861	3.284	6.322	6.674	9.323	3.336	3.238	7.504	10.385	11.808	8.004	6.389	11.029	13.389	13.369	7.366	5.993	9.618	11.24
LOC105616331	105616331	XM_012185680	chromodomain-helicase-DNA-binding protein 3-like	11:27149930-27152117:1	0	6.528	1.74	1.691	5.35	0	13.392	4.717	0	5.039	0	3.939	4.382	0	6.187	0	0.255	6.283	0	7.31	0	10.196	2.865	0	2.212	0	6.831	3.861	0	5.215
ENSOARG00000001165	ENSOARG00000001165	ENSOART00000001246.1	no description available	JH923009.1:14579-17408:1	1.416	2.029	2.29	1.291	2.954	2.971	3.58	3.324	2.434	3.601	9.808	10.778	12.755	13.4	9.882	5.003	2.414	4.274	5.459	4.538	1.128	1.219	2.16	1.621	1.463	1.722	1.644	2.328	2.097	2.097
TARBP1	ENSOARG00000003434	ENSOART00000003754.1, XM_012105601	TAR (HIV-1) RNA binding protein 1	25:7258989-7324294:-1	12.918	5.068	3.052	4.329	7.372	11.821	4.698	3.925	5.523	11.061	13.401	5.911	2.607	3.079	4.814	9.441	4.488	2.592	4.955	8.055	11.302	5.542	4.471	6.573	8.969	9.898	5.098	3.37	4.892	9.177
AWAT1	ENSOARG00000015193	ENSOART00000016536.1, XM_012106859	acyl-CoA wax alcohol acyltransferase 1	X:59698055-59705015:1	0.086	4.752	7.357	6.434	3.231	0.165	2.465	5.842	3.063	0.382	0.211	4.168	13.402	7.354	10.272	0.183	3.774	3.514	1.686	0.79	0.187	2.763	1.952	0.539	0.146	0.107	2.357	3.143	1.833	0.2
SFR1	ENSOARG00000006415	ENSOART00000006968.1, XM_004020170, XM_012102883	SWI5-dependent recombination repair 1	22:23767253-23771229:1	10.834	3.638	2.392	3.48	2.7	9.303	2.504	2.799	5.524	4.265	8.341	2.561	1.526	4.297	1.927	11.075	3.004	2.287	6.084	5.765	13.404	3.775	2.719	7.58	7.888	9.297	1.642	2.412	6.138	5.047
KLHL36	ENSOARG00000010970	ENSOART00000011930.1, XM_004014945	kelch-like family member 36	14:10315844-10326220:1	12.428	10.518	8.073	10.071	10.386	13.355	10.046	8.469	8.743	11.083	13.406	9.959	6.973	7.587	6.895	12.079	7.027	6.97	8.185	7.888	11.072	8.927	7.541	7.636	7.49	11.178	8.561	6.608	7.453	8.8
TRAM2	ENSOARG00000014535	ENSOART00000015824.1, XM_012101447	translocation associated membrane protein 2	20:24671697-24722198:-1	8.039	8.399	3.641	2.627	8.239	8.432	9.235	4.468	3.293	13.419	10.257	8.47	3.598	2.497	6.997	6.389	6.44	3.407	4.027	9.213	6.743	6.643	4.864	4.32	10.265	8.37	6.305	2.395	2.373	11.418
PLCXD3	ENSOARG00000008952	ENSOART00000009749.1, ENSOART00000009750.1, XM_012096991	phosphatidylinositol-specific phospholipase C, X domain containing 3	16:33089749-33162632:1	5.265	8.008	6.679	4.865	2.605	2.684	3.813	3.264	2.724	0.78	3.431	13.427	10.795	7.427	3.325	1.949	2.124	2.282	2.1	0.855	2.366	3.885	3.003	2.42	0.993	2.418	3.277	3.269	2.26	0.944
BAZ2A	ENSOARG00000008407	ENSOART00000009154.1, XM_004006574, XM_012174735, XM_012174736, XM_012174738, XM_012174739	bromodomain adjacent to zinc finger domain, 2A	3:162744678-162761716:1	4.452	5.134	6.625	3.656	11.164	4.271	6.569	7.42	3.044	13.439	5.758	5.988	6.326	4.133	10.086	4.284	7.112	7.389	3.922	11.38	4.489	6.392	8.634	4.67	10.2	4.036	5.257	7.114	2.742	10.26
TCTN2	ENSOARG00000002876	ENSOART00000003116.1, XM_012097691	tectonic family member 2	17:51588988-51617226:-1	13.039	7.533	5.648	5.182	5.004	11.572	7.384	5.112	5.339	8.073	11.459	7.169	4.719	3.985	2.377	9.927	6.178	4.682	6.308	7.827	13.439	7.778	5.702	7.115	8.574	9.037	5.703	3.658	3.695	5.627
FANCA	ENSOARG00000014579	ENSOART00000015878.1	FA complementation group A	14:14134148-14171224:-1	9.041	11.525	9.477	6.947	9.353	9.274	11.586	10.282	8.265	13.441	11.009	10.734	8.293	7.574	7.118	8.818	10.2	9.802	8.102	9.889	8.031	10.869	10.329	7.526	9.778	9.537	11.228	9.736	6.963	11.432
NOV	101113859	XM_004011765	nephroblastoma overexpressed	9:57699877-57708388:-1	1.134	4.382	3.006	4.27	12.141	2.316	4.862	6.579	9.452	4.74	1.73	1.372	1.295	2.064	4.662	2.258	2.668	3.433	5.055	3.922	4.584	5.261	7.68	13.442	8.234	5.228	9.195	6.886	11.145	6.073
ZNF462	ENSOARG00000007213	ENSOART00000007848.1, XM_012114291	zinc finger protein 462	2:16037770-16192583:-1	2.081	4.621	4.985	3.144	3.979	2.502	8.22	13.449	5.337	5.5	4.044	5.362	11.979	6.969	4.801	3.057	3.584	8.24	4.459	4.158	2.551	6.377	7.46	4.226	4.115	2.182	4	5.614	2.306	3.534
ATP9B	ENSOARG00000004295	ENSOART00000004689.1, XM_012103260	ATPase, class II, type 9B	23:824796-980140:-1	10.612	9.1	7.202	5.99	8.364	10.25	10.827	7.929	6.506	13.451	11.584	9.962	7.23	6.777	6.691	10.923	10.467	11.025	9.712	9.675	11.4	11.722	9.943	9.011	11.124	10.079	10.525	7.456	6.599	9.942
ENSOARG00000004810	ENSOARG00000004810	ENSOART00000005242.1	no description available	23:7100287-7101698:-1	13.464	3.076	3.066	7.963	5.089	6.723	2.726	1.928	6.891	5.975	10.973	1.792	1.38	5.347	4.534	7.137	2.279	3.631	11.416	3.427	4.852	2.541	4.007	7.934	3.711	6.303	1.893	2.04	6.057	3.351
TNRC6A	ENSOARG00000017950	ENSOART00000019537.1, ENSOART00000019539.1	trinucleotide repeat containing adaptor 6A	24:22384968-22479794:1	13.475	5.9	4.783	13.255	7.622	11.697	7.319	8.877	11.75	12.146	12.008	5.661	4.138	9.293	6.291	9.687	7.881	8.284	11.365	7.941	12.126	7.858	8.871	10.847	9.062	12.28	5.759	6.417	9.839	10.449
SULT1C4	ENSOARG00000000191	ENSOART00000000200.1	sulfotransferase family 1C member 4	3:61762112-61769403:1	3.153	8.655	2.551	0.577	7.956	4.736	7.044	5.429	2.095	8.672	3.173	6.477	2.049	0.617	3.036	5.325	8.585	7.683	2.519	9.326	5.485	10.174	8.327	2.739	12.643	4.946	8.407	3.873	2.207	13.479
RRNAD1	ENSOARG00000006252	ENSOART00000006804.1, XM_004002630	ribosomal RNA adenine dimethylase domain containing 1	1:105265254-105272364:1	9.902	10.367	7.86	8.82	9.074	11.428	13.481	10.046	11.518	10.485	11.703	11.53	8.06	8.565	6.787	9.537	8.312	9.688	8.775	8.192	10.682	11.45	9.481	8.531	8.675	11.204	9.38	7.884	8.471	10.593
KANSL1	ENSOARG00000011438	ENSOART00000012441.1, XM_004013006, XM_012186242, XM_012186243, XM_012186244, XM_012186245, XM_012186246	KAT8 regulatory NSL complex subunit 1	11:45439216-45580016:-1	13.294	9.698	8.27	9.417	7.542	12.843	9.195	9.579	9.272	10.416	13.485	7.592	7.201	10.323	8.97	11.753	9.021	7.733	9.993	7.492	10.455	10.231	8.948	9.691	7.324	10.403	8.938	8.493	9.036	8.12
ENSOARG00000014186	ENSOARG00000014186	ENSOART00000015454.1	no description available	9:13577626-13595333:-1	3.385	7.364	10.485	4.588	6.95	4.401	9.268	12.273	4.164	12.997	5.99	7.289	8.533	1.885	6.235	4.597	6.806	6.039	3.233	8.883	4.614	9.805	13.493	5.447	9.591	3.932	9.068	9.363	3.244	9.214
ARMC12	ENSOARG00000012346	ENSOART00000013426.1, XM_012100528, XM_012100531	armadillo repeat containing 12	20:9853735-9863090:1	1.433	7.763	2.814	1.737	4.949	2.803	12.172	4.387	2.415	1.339	0.786	3.612	1.069	1.216	1.68	1.992	11.808	4.962	2.617	0.731	3.082	13.497	8.004	5.702	2.008	1.616	8.128	5.806	3.305	1.713
TCTN3	ENSOARG00000006497	ENSOART00000007067.1, XM_012102636	tectonic family member 3	22:16384343-16405127:-1	9.754	6.915	4.063	3.788	4.749	10.367	8.485	6.621	6.235	9.49	9.761	7.474	3.577	3.452	3.694	9.451	6.81	5.069	6.993	7.79	11.5	6.762	6.596	7.048	7.807	13.497	9.274	6.969	6.244	9.95
ENSOARG00000003679	ENSOARG00000003679	ENSOART00000003992.1	no description available	X:41734097-41734689:-1	3.226	4.821	3.11	4.803	2.511	5.263	3.102	3.948	5.399	3.6	4.928	2.383	2.457	3.625	1.062	6.03	2.231	1.738	4.439	2.119	11.449	5.183	2.681	8.688	3.39	13.506	7.051	6.316	10.248	3.819
RPIA	ENSOARG00000020781	ENSOART00000022641.1	ribose 5-phosphate isomerase A	3:59227317-59261897:1	8.813	7.321	6.162	6.281	4.639	6.988	12.127	13.518	12.282	5.564	9.58	6.085	6.413	5.594	3.27	7.983	7.524	7.109	7.671	5.569	6.42	7.121	9.562	7.681	5.323	7.487	6.475	9.171	8.745	5.496
NOTCH1	ENSOARG00000003820	ENSOART00000004157.1, XM_012175867	notch 1	3:2871491-2903492:1	4.524	12.182	11.258	4.577	11.568	3.55	13.529	13.409	3.848	12.494	4.44	9.295	7.736	3.916	10.944	2.968	7.708	10.204	4.81	9.111	3.887	9.095	12.418	4.566	8.62	3.347	7.926	9.917	3.367	9.542
LOC101116576	101116576	XM_004010744, XM_012181890	sentrin-specific protease 8-like	7:76678706-76680828:1	10.095	5.614	4.073	8.356	8.442	10.711	4.952	7.375	12.808	8.42	9.329	4.821	4.839	7.52	5.354	10.308	4.992	6.77	11.876	7.664	11.831	4.631	5.696	13.532	10.02	13.032	3.488	6.72	11.721	9.611
MFSD6	ENSOARG00000016246	ENSOART00000017692.1, XM_004004496, XM_012130893, XM_012130904, XM_012130924	major facilitator superfamily domain containing 6	2:117679652-117741626:-1	10.03	4.616	3.588	4.227	7.147	9.143	5.851	4.339	5.833	11.233	9.038	5.401	2.062	4.012	7.485	7.695	5.32	4.478	8.195	6.034	10.347	7.405	5.011	6.944	6.898	13.532	10.107	5.542	5.668	9.724
ENSOARG00000010372	ENSOARG00000010372	ENSOART00000011282.1	RNA polymerase III subunit D	2:43106214-43114254:-1	9.202	4.136	5.357	13.538	3.046	3.153	3.846	6.148	6.191	2.426	3.831	4.23	4.575	3.932	2.237	3.665	3.925	4.646	4.561	1.913	3.699	4.525	7.009	5.01	2.891	3.782	4.853	4.101	5.784	2.908
ENSOARG00000011664	ENSOARG00000011664	ENSOART00000012683.1	SUMO peptidase family member, NEDD8 specific	7:18728768-18729436:1	6.3	5.468	4.524	8.167	9.319	11.004	5.541	7.945	11.414	9.579	9.151	4.971	3.452	7.724	6.074	8.011	4.346	8.111	11.202	8.482	11.968	6.659	11.09	12.431	13.544	10.809	4.455	4.203	9.74	8.989
NRD1	101111671	XM_004001969, XM_004001970	nardilysin (N-arginine dibasic convertase)	1:25975251-26086777:-1	2.723	3.756	3.912	2.001	3.568	2.687	7.259	6.904	2.581	5.948	2.205	5.678	4.286	1.216	2.669	2.264	9.965	13.559	4.325	4.348	1.402	6.351	4.889	2.063	4.097	1.239	3.632	4.396	1.793	4.327
DOCK1	ENSOARG00000013080	ENSOART00000014233.1, ENSOART00000014234.1, XM_004020265	dedicator of cytokinesis 1	22:45363869-45876573:1	11.957	9.232	8.449	8.26	9.553	9.085	9.488	8.812	8.214	11.912	12.096	9.586	7.956	6.929	6.997	8.518	8.666	8.134	8.482	9.878	12.666	12.85	11.521	11.27	13.399	13.276	12.811	10.806	10.245	13.562
TRAPPC9	ENSOARG00000004022	ENSOART00000004377.1, XM_004011625, XM_012183493, XM_012183495, XM_012183496, XM_012183497, XM_012183498	trafficking protein particle complex 9	9:16069503-16379846:1	7.758	12.922	8.88	4.7	8.578	8.468	13.369	8.691	4.983	13.563	8.434	11.103	7.724	4.47	4.889	6.658	9.334	8.493	5.157	9.164	6.904	10.219	7.876	5.792	7.758	6.161	11.282	8.178	3.776	9.453
SPATA5L1	ENSOARG00000021043	ENSOART00000022927.1, XM_012182325	spermatogenesis associated 5-like 1	7:62019570-62038684:-1	8.264	5.36	7.365	8.581	3.572	8.688	6.354	11.45	13.566	4.753	7.769	4.879	4.766	5.911	1.907	6.349	4.983	4.492	8.523	3.713	8.294	7.467	9.978	9.718	4.121	7.357	6.104	8.109	13.336	4.434
HDAC9	ENSOARG00000009641	ENSOART00000010499.1, NM_001246262	histone deacetylase 9	4:27257275-27354592:1	1.531	1.468	0.467	0.847	0.179	10.659	3.857	2.431	3.115	0.994	1.758	0.919	0.563	0.425	0.253	13.571	7.625	1.812	2.062	2.183	13.568	4.931	2.699	3.138	2.446	9.667	5.696	2.681	3.38	1.792
NDUFAF1	ENSOARG00000020352	ENSOART00000022163.1	NADH:ubiquinone oxidoreductase complex assembly factor 1	7:33839644-33853457:-1	9.35	6.301	4.201	6.107	6.808	9.682	6.854	7.094	12.066	9.261	8.121	3.933	3.231	7.011	3.592	11.239	8.558	7.346	13.573	9.23	12.778	8.502	8.597	13.027	10.828	9.807	5.495	5.495	9.253	7.893
ZC3HAV1L	ENSOARG00000010842	ENSOART00000011787.1, XM_012177465	zinc finger CCCH-type, antiviral 1-like	4:102427599-102442315:-1	9.489	4.715	3.708	4.24	9.727	8.605	5.193	3.058	5.185	12.127	9.385	5.168	1.449	1.642	8.103	8.179	6.345	5.035	4.333	10.912	11.24	6.796	6.143	6.907	11.247	11.697	8.337	4.223	6.661	13.578
DGKD	ENSOARG00000019293	ENSOART00000021009.1, XM_012106169	diacylglycerol kinase, delta 130kDa	1:7292256-7376833:-1	3.972	8.192	7.444	7.259	3.77	3.411	8.814	13.579	6.528	3.288	4.617	8.714	10.809	9.116	3.01	4.208	9.036	12.708	6.102	3.123	3.457	5.877	5.378	3.755	3.282	2.739	4.977	5.37	3.68	2.419
LMBR1L	ENSOARG00000018920	ENSOART00000020600.1, XM_004006383, XM_012174348, XM_012174349, XM_012174350	limb development membrane protein 1-like	3:136942405-136954530:1	11.069	7.858	6.091	6.614	12.452	9.921	6.811	5.819	8.592	9.767	11.546	5.775	4.493	10.57	11.586	11.017	9.412	7.106	13.58	13.079	12.117	7.473	7.33	10.66	12.256	13.069	8.746	6.062	8.477	12.405
CCDC86	ENSOARG00000015563	ENSOART00000016931.1, XM_004019557	coiled-coil domain containing 86	21:36362035-36369949:1	9.162	5.699	7.78	7.521	5.185	7.249	6.208	9.507	13.586	7.292	10.108	4.403	4.468	4.287	2.965	7.495	5.197	5.346	6.611	5.456	10.811	9.542	12.312	10.854	7.067	11.592	8.052	9.559	12.106	7.762
RASL11A	ENSOARG00000012603	ENSOART00000013702.1, XM_012185010	RAS-like, family 11, member A	10:32831942-32834432:-1	0.305	2.289	0.694	0.104	0.058	0.473	13.588	2.137	3.292	2.838	0.81	3.033	4.712	3.929	0.877	0.261	3.042	0.959	0.375	0.067	0.453	3.206	0.378	0.537	0.353	0.551	3.012	0.624	0.41	0.632
KIF18A	ENSOARG00000015211	ENSOART00000016556.1, XM_004016360, XM_012096138	kinesin family member 18A	15:56873562-56953466:-1	11.838	2.71	2.477	6.381	3.645	9.424	2.424	3.691	7.271	5.892	13.591	2.549	2.318	10.459	2.184	5.843	2.31	1.324	4.511	4.631	10.754	3.881	4.867	8.459	5.045	12.995	2.416	3.443	8.926	6.981
LGALSL	101118687	XM_012168398	lectin, galactoside-binding-like	3:43708996-43716840:-1	5.973	3.901	3.916	7.344	7.872	12.692	11.506	11.029	12.171	11.673	7.726	5.888	4.02	6.726	4.553	7.441	6.379	5.343	9.101	5.52	10.34	4.631	6.636	7.269	6.42	13.591	8.259	5.568	7.141	11.415
CLCN6	ENSOARG00000018297	ENSOART00000019913.1, XM_012187317, XM_012187318, XM_012187319, XM_012187320	chloride channel, voltage-sensitive 6	12:39981962-40007097:-1	9.045	12.31	5.804	3.317	6.254	13.592	12.738	7.377	4.021	13.319	10.786	7.683	4.443	3.169	4.097	12.271	7.911	4.314	4.468	7.971	7.657	7.94	5.502	4.335	6.269	9.055	7.594	4.83	3.273	8.998
SMC5	101104964	XM_004004322, XM_012123325, XM_012123335, XM_012123349	structural maintenance of chromosomes 5	2:65817522-65886558:-1	9.248	1.254	2.814	8.749	2.575	9.202	2.302	2.955	13.595	4.507	9.778	1.734	2.181	8.341	1.495	6.831	1.625	1.908	8.138	2.297	8.731	1.992	3.349	8.385	2.675	8.855	1.99	2.529	9.235	2.886
TEFM	ENSOARG00000012067	ENSOART00000013126.1	transcription elongation factor, mitochondrial	11:17683036-17687287:1	8.749	3.161	3.287	5.904	4.571	7.232	3.92	6.281	13.597	7.734	7.477	2.053	2.711	5.703	2.911	6.106	2.723	4.638	9.549	4.958	9.457	4.128	5.586	11.21	5.954	10.929	3.081	5.216	10.231	7.688
ENSOARG00000017053	ENSOARG00000017053	ENSOART00000018566.1	syntaxin 16	13:57008000-57030619:-1	7.398	8.169	5.859	7.814	7.805	7.191	11.939	7.582	5.856	13.6	5.325	5.363	3.824	3.642	5.075	7.141	6.911	8.316	6.076	8.677	6.347	7.545	9.599	5.627	7.686	6.297	8.404	3.732	7.089	9.291
ENSOARG00000001736	ENSOARG00000001736	ENSOART00000001863.1	no description available	1:221473296-221473942:-1	2.974	6.632	5.844	4.943	3.751	3.778	7.482	8.287	6.635	3.868	3.5	7.129	4.127	4.348	3.203	2.975	10.35	6.136	5.613	2.411	5.762	13.601	7.437	5.57	4.746	3.992	12.837	6.609	6.644	3.803
GSG2	105610737	XM_012186646	germ cell associated 2 (haspin)	11:24008187-24011325:1	9.965	4.727	5.006	5.671	5.966	7.617	4.231	4.584	5.643	9.48	13.601	4.831	4.654	8.84	4.151	4.92	2.091	2.59	3.325	5.509	8.005	4.987	4.823	5.892	6.965	11.532	5.114	5.436	6.958	9.489
ENSOARG00000000244	ENSOARG00000000244	ENSOART00000000258.1	no description available	2:234395541-234403556:1	11.567	8.673	5.001	6.671	5.622	13.104	7.584	6.173	7.43	8.559	13.613	7.622	4.551	4.569	3.73	12.968	6.861	4.787	6.876	6.118	10.898	8.425	6.204	7.597	7.63	11.106	6.826	4.756	7.036	7.236
ENSOARG00000006641	ENSOARG00000006641	ENSOART00000007217.1	no description available	10:7450054-7547626:-1	9.089	3.184	4.032	10.087	3.168	9.899	3.41	5.168	8.478	2.429	11.886	5.09	5.074	9.091	3.242	8.135	2.987	2.437	6.983	3.057	10.441	4.602	5.375	11.827	3.04	12.646	4.642	4.918	13.614	3.866
LOC101115838	101115838	XM_012172418	uncharacterized LOC101115838	1:43033013-43090828:-1	6.326	5.212	5.178	6.086	4.828	13.619	9.995	8.729	7.531	8.009	8.752	4.24	5.709	5.322	2.714	12.461	7.346	5.324	9.618	6.497	9.557	5.729	5.397	7.33	6.734	11.433	7.295	5.617	7.235	4.519
ENSOARG00000004572	ENSOARG00000004572	ENSOART00000004972.1	no description available	4:14338474-14340585:1	10.787	11.804	8.638	4.624	12.536	7.728	7.36	6.248	9.227	13.623	6.274	3.621	8.552	1.153	5.105	2.752	10.281	8.408	8.641	11.322	0	0	8.133	6.033	6.285	5.844	2.459	5.221	8.581	5.044
SFXN4	ENSOARG00000001599	ENSOART00000001716.1, XM_012103009	sideroflexin 4	22:38275688-38291824:-1	13.623	5.02	5.006	6.35	4.41	8.857	2.938	8.068	12.844	8.377	11.845	6.131	4.83	5.533	2.166	9.372	3.912	4.251	6.98	7.649	8.69	4.865	5.417	7.255	7.679	9.972	4.163	4.331	8.452	7.892
C5orf30	ENSOARG00000018607	ENSOART00000020251.1	chromosome 5 open reading frame 30	5:99509492-99557151:1	5.323	5.444	4	7.27	6.247	7.345	7.068	11.504	13.626	5.728	7.542	3.696	6.108	9.996	6.229	6.327	2.699	4.758	5.818	4.516	5.644	3.587	5.746	4.687	4.139	6.516	2.364	2.72	3.888	4.219
ENSOARG00000016253	ENSOARG00000016253	ENSOART00000017699.1	no description available	X:19210795-19238228:1	8.535	4.587	6.035	5.905	1.396	12.868	9.401	7.58	9.171	9.695	7.799	4.238	3.623	3.25	2.988	13.031	8.27	2.942	10.593	9.462	12.95	7.321	8.21	13.634	12.357	9.488	5.471	6.013	12.452	8.069
PDE4DIP	ENSOARG00000020482	ENSOART00000022309.1, ENSOART00000022310.1, XM_004002395, XM_012179684, XM_012179690, XM_012179696, XM_012179700	phosphodiesterase 4D interacting protein	1:96897719-96978986:1	5.792	3.349	0.945	1.476	3.195	11.172	5.436	4.675	5.593	7.03	4.6	2.082	0.811	1.499	1.634	9.655	13.637	5.067	4.832	7.37	11.851	7.827	5.261	6.123	8.845	9.893	6.749	3.483	4.437	6.243
BPI	ENSOARG00000018736	ENSOART00000020401.1, XM_004014565	bactericidal/permeability-increasing protein	13:66754420-66786117:1	7.575	7.486	6.864	4.613	6.374	5.634	5.466	3.618	3.756	4.714	8.02	7.483	7.568	4.786	8.154	12.553	12.053	10.569	10.491	13.641	6.49	7.001	6.238	6.594	9.744	5.935	4.881	5.12	3.575	7.453
MMP13	ENSOARG00000004790	ENSOART00000005220.1, ENSOART00000005222.1, NM_001166179	matrix metallopeptidase 13	15:5258838-5269618:1	1.529	2.07	2.607	2.571	2.01	0.298	0.158	0.239	0.599	0.174	0.884	1.845	2.895	13.642	11.126	0.033	0.111	0.124	0.542	0.016	0.536	0.084	0.088	0.344	0.142	0.154	0	0.342	0.398	0.479
DHTKD1	ENSOARG00000014833	ENSOART00000016153.1, ENSOART00000016159.1, XM_012188198, XM_012188199, XM_012188200, XM_012188201	dehydrogenase E1 and transketolase domain containing 1	13:15772122-15804792:1	9.925	8.938	8.434	7.987	8.582	9.592	10.083	9.453	10.434	9.614	11.239	10.484	6.92	8.667	8.077	13.651	9.433	9.987	11.541	9.983	12.332	10.978	10.308	12.031	10.69	13.116	9.931	8.126	12.01	11.287
LOC101102526	101102526	XM_004003356	keratin-associated protein 10-8-like	1:259929426-259932354:1	0.493	1.509	3.552	2.428	3.336	0.308	2.932	7.339	4.753	2.089	0.391	1.474	3.107	2.7	1.621	0.706	2.532	5.78	4.581	2.738	2.307	6.575	11.709	8.292	6.284	1.741	7.561	13.652	6.864	3.207
SRFBP1	ENSOARG00000000329	ENSOART00000000346.1, XM_004008682	serum response factor binding protein 1	5:29267106-29334646:-1	11.593	4.476	5.366	9.32	4.642	10.069	4.548	6.956	12.86	4.873	13.086	4.217	4.693	6.689	2.683	9.69	5.286	5.341	8.856	5.277	11.671	6.031	8.609	12.213	4.132	13.652	4.33	7.61	13.044	7.07
FRS2	ENSOARG00000020339	ENSOART00000022148.1	fibroblast growth factor receptor substrate 2	3:149939391-149951546:-1	8.587	5.009	4.232	7.004	3.946	13.656	5.931	6.755	11.099	6.677	9.339	4.26	5.291	9.692	3.756	11.941	4.797	6.312	10.243	4.917	8.898	6.963	4.89	9.572	4.404	10.215	4.303	5.257	8.325	6.024
ATF7IP	ENSOARG00000020787	ENSOART00000022648.1, XM_004006840, XM_012175323, XM_012175324, XM_012175325, XM_012175326, XM_012175328	activating transcription factor 7 interacting protein	3:200220881-200295275:-1	11.067	3.976	5.298	8.955	6.076	13.031	4.284	10.139	11.376	8.57	11.217	3.159	4.238	9.793	4.692	11.075	2.035	5.759	11.631	5.699	13.66	4.58	7.795	11.292	8.669	12.559	3.695	4.785	8.22	9.305
TRDMT1	ENSOARG00000011090	ENSOART00000012063.1, XM_004014246, XM_012188437, XM_012188438, XM_012188439, XM_012188440, XM_012188441, XM_012188442, XM_012188443, XM_012188444, XM_012188445	tRNA aspartic acid methyltransferase 1	13:30653417-30689993:-1	13.092	6.452	6.663	11.05	8.469	10.193	5.05	6.573	12.661	8.626	13.66	10.232	5.053	11.63	7.422	7.541	5.652	3.927	10.331	6.068	9.539	6.881	8.737	10.011	6.754	11.697	6.749	7.304	9.367	8.981
RABGGTA	ENSOARG00000019139	ENSOART00000020844.1, XM_004010300, XM_012180922	Rab geranylgeranyltransferase, alpha subunit	7:20515674-20521604:1	8.13	8.118	5.476	5.357	12.683	9.381	6.715	6.931	9.914	13.234	10.413	7.34	4.31	5.321	7.074	8.802	5.963	7.218	7.026	11.1	11.946	11.174	10.507	12.624	13.661	12.575	10.934	7.161	8.503	12.023
ARPC1A	101113818	XM_012104617	actin related protein 2/3 complex, subunit 1A, 41kDa	24:36902699-36926273:-1	10.5	7.825	7.4	8.779	8.076	8.747	7.096	7.286	8.647	10.92	8.966	8.954	6.021	8.721	8.839	7.731	7.024	5.929	9.849	8.101	9.802	9.26	8.224	9.362	10.319	13.664	10.879	9.715	12.389	13.413
GNAL	ENSOARG00000001613	ENSOART00000001742.1	G protein subunit alpha L	23:43042712-43087998:1	10.547	10.019	8.697	10.371	7.826	13.052	9.193	12.057	10.351	11.204	11.31	10.295	9.627	8.199	6.444	13.668	11.093	9.892	10.161	8.013	11.352	11.176	9.595	9.262	11.87	10.088	9.033	6.759	7.784	6.726
PPM1D	ENSOARG00000017048	ENSOART00000018560.1, XM_012185245	protein phosphatase, Mg2+/Mn2+ dependent, 1D	11:11880154-11939415:-1	9.73	8.913	8.189	8.035	6.244	11.392	9.688	11.484	13.671	5.661	11.421	9.891	8.47	9.237	4.808	11.902	10.585	7.553	11.806	7.004	8.626	7.389	7.597	9.574	7.494	8.398	7.093	9.608	10.659	6.281
TFF2	ENSOARG00000010688	ENSOART00000011629.1	trefoil factor 2	1:260685063-260688375:-1	0.095	0	0.164	0.497	0.142	10.855	13.145	13.676	5.837	3.649	0.92	0.581	0.561	0.442	0	7.186	7.658	7.158	6.517	3.938	0.779	0.96	2.509	0.807	0.785	2.859	3.704	5.387	2.297	2.958
HLA-DMA	ENSOARG00000007972	ENSOART00000008679.1	major histocompatibility complex, class II, DM alpha	20:7367386-7372035:-1	13.68	6.365	5.794	8.97	3.229	8.584	6.377	8.864	4.962	0.65	7.069	0	4.447	2.647	0	10.356	11.771	3.228	5.582	2.521	2.227	4.385	4.744	3.273	7.387	1.51	1.441	0	3.112	4.319
LOC101114239	101114239	XM_012113829, XM_012113838, XM_012113849, XM_012113859, XM_012113867, XM_012113877, XM_012113888, XM_012113895	A-kinase anchor protein 2	2:13111259-13157691:-1	1.519	0.738	2.516	6.186	2.236	0.965	2.782	13.68	10.384	2.071	2.713	0.777	7.8	9.864	6.597	0.921	0.447	4.835	6.13	1.008	2.09	1.529	5.424	6.991	2.308	1.66	0.832	3.33	4.945	1.668
PHLDB1	ENSOARG00000010885	ENSOART00000011846.1, XM_012095544	pleckstrin homology-like domain, family B, member 1	15:28755693-28799941:1	3.515	7.649	3.267	2.943	4.687	5.187	13.68	3.952	2.808	6.755	3.615	4.213	1.99	1.795	3.394	3.247	3.585	2.493	2.713	3.627	3.996	6.15	3.401	2.919	3.565	4.61	6.676	4.621	2.937	4.616
KIAA0513	ENSOARG00000011232	ENSOART00000012212.1, XM_004014947	KIAA0513 ortholog	14:10651467-10672828:1	11.76	4.143	3.678	6.708	13.683	5.174	2.917	2.063	3.854	8.437	9.173	3.234	1.563	3.439	13.485	6.036	4.197	3.473	6.777	8.755	4.272	3.191	3.221	6.045	10.814	6.666	2.481	2.323	4.136	9.591
BMP6	ENSOARG00000017264	ENSOART00000018791.1, XM_012101319, XM_012101320	bone morphogenetic protein 6	20:46486155-46520964:-1	0	0.193	1.072	5.651	1.229	0.016	0.723	3.039	13.7	0.169	0	0.441	1.156	9.344	1.707	0	0.491	0.58	1.195	0.052	0.026	0.227	0.836	2.617	0.064	0.024	0.084	0.732	1.655	0.114
PRMT6	ENSOARG00000011289	ENSOART00000012275.1	protein arginine methyltransferase 6	1:83572329-83573456:1	7.69	4.175	3.373	6.692	5.783	6.792	4.669	7.412	13.708	9.436	8.754	4.318	2.64	5.849	3.639	6.524	6.389	6.078	9.631	6.049	10.455	6.762	8.501	10.66	7.698	9.794	6.439	4.899	10.47	8.702
PLPP1	ENSOARG00000007720	ENSOART00000008403.1, ENSOART00000008406.1	phospholipid phosphatase 1	16:23684862-23797861:1	12.917	9.124	5.203	8.083	9.984	8.426	4.809	4.47	9.543	10.781	13.713	7.271	5.586	5.612	8.72	9.725	11.064	6.974	8.472	10.696	12.147	7.041	5.244	10.767	13.005	11.644	8.881	5.114	10.541	11.012
HYLS1	ENSOARG00000011905	ENSOART00000012946.1	HYLS1 centriolar and ciliogenesis associated	21:28491352-28495960:1	8.652	4.435	5.042	4.947	7.919	11.382	5.194	6.792	8.87	9.866	10.546	4.225	3.672	4.812	3.021	7.654	1.655	2.906	5.078	7.876	12.086	8.51	10.424	9.07	10.655	13.716	5.866	8.782	10.228	10.728
ENSOARG00000004878	ENSOARG00000004878	ENSOART00000005312.1	no description available	17:71731264-71731449:-1	1.318	3.734	1.597	1.125	1.4	4.007	8.129	3.533	2.681	2.468	3.404	13.719	8.696	3.621	0.728	2.171	7.141	4.53	3.323	0.845	1.861	2.972	0	1.363	0.941	1.694	3.597	2.655	3.005	0.721
GAS1	101114683	XM_012154829	growth arrest-specific 1	2:32671495-32673740:1	9.207	3.202	2.61	5.083	4.543	11.004	3.788	6.969	12.881	8.553	8.986	2.504	3.668	6.857	3.401	13.723	2.605	5.098	8.339	5.943	5.51	3.346	5.402	5.585	3.854	6.623	2.792	1.506	3.553	5.474
KDM5B	ENSOARG00000018421	ENSOART00000020050.1, XM_012188005	lysine (K)-specific demethylase 5B	12:78076199-78117790:1	6.803	3.696	5.199	6.936	12.339	8.792	6.684	7.111	9.681	10.143	8.957	4.193	4.669	9.985	13.723	9.225	7.553	5.706	10.567	9.573	11.027	6.754	9.256	11.637	11.915	7.676	6.152	7.498	8.836	10.015
PHTF1	ENSOARG00000019841	ENSOART00000021605.1, XM_012178904, XM_012178911, XM_012178919, XM_012178923, XM_012178924, XM_012178931	putative homeodomain transcription factor 1	1:90144676-90195825:-1	10.229	5.734	6.467	8.48	4.647	7.724	5.272	6.891	9.621	5.777	9.886	6.627	4.961	8.841	4.916	6.881	5.641	7.659	13.733	4.516	8.712	5.191	5.172	9.722	4.968	9.719	5.814	5.253	8.538	4.821
ENSOARG00000015072	ENSOARG00000015072	ENSOART00000016407.1	no description available	1:65625202-65634761:-1	0.1	0.205	0.43	0.665	0.024	0.223	0.374	1.593	2.052	0.044	0.203	0.787	8.951	13.734	0.118	0.477	0.293	3.464	8.777	0.188	0.656	0.529	1.166	1.671	0.56	0.272	0.154	0.549	1.279	0.311
HMGB3	101107173	XM_012107806	high mobility group box 3	X:79762786-79872492:-1	7.531	11.405	8.154	2.799	6.895	4.947	8.111	7.215	4.644	11.821	9.507	13.734	7.568	4.727	3.871	5.137	4.746	5.629	2.272	5.907	7.906	10.364	10.4	6.453	10.474	7.864	9.095	9.108	2.678	13.271
XYLT2	ENSOARG00000004687	ENSOART00000005103.1, XM_004012770, XM_012185908, XM_012185909, XM_012185910, XM_012185911, XM_012185912	xylosyltransferase II	11:35850203-35864629:-1	6.576	4.146	2.304	3.333	10.168	5.707	5.246	2.904	4.022	13.736	7.151	4.833	1.265	2.765	5.893	5.428	4.847	3.167	4.242	11.001	8.612	7.775	4.849	6.659	12.215	7.332	5.97	2.889	3.586	12.068
CPSF1	101108319	XM_012184238	cleavage and polyadenylation specific factor 1, 160kDa	9:13502675-13517998:1	5.54	10.494	8.37	4.786	9.136	5.412	11.031	10.369	5.384	13.737	8.072	13.189	8.319	4.353	5.106	5.744	9.812	9.414	4.436	10.816	5.91	12.515	10.656	5.52	11.039	5.479	12.629	10.588	4.916	12.671
ME1	ENSOARG00000007496	ENSOART00000008163.1, NM_001135220	malic enzyme 1, NADP(+)-dependent, cytosolic	8:10275434-10461247:-1	4.197	2.163	4.398	4.847	3.281	3.861	5.778	10.332	9.368	13.737	6.785	6.643	7.927	6.441	9.057	2.627	3.067	5.26	5.653	6.169	8.334	9.159	12.21	11.71	11.952	6.155	7.47	8.561	6.806	8.137
GCC1	ENSOARG00000001814	ENSOART00000001949.1, XM_012177087	GRIP and coiled-coil domain containing 1	4:91882741-91888353:-1	12.962	8.14	6.988	9.497	10.414	12.592	9.001	10.275	9.327	9.68	12.409	8.853	8.81	8.448	9.371	13.558	13.739	11.552	10.946	11.249	10.455	12.106	11.008	8.718	11.41	12.678	13.592	11.505	11.344	12.548
SEPN1	101117829	XM_012157179	selenoprotein N, 1	2:240145635-240161903:-1	2.725	10.735	8.592	2.508	7.304	3.044	13.742	7.932	2.003	13.697	3.279	9.947	5.725	2.03	6.367	2.957	10.452	6.324	1.974	11.854	4.303	13.208	12.041	3.01	10.098	3.119	13.167	8.451	2.259	12.223
SLC2A8	ENSOARG00000012161	ENSOART00000013227.1, XM_012162546	solute carrier family 2 (facilitated glucose transporter), member 8	3:8658036-8667830:-1	5.321	4.143	1.76	1.599	2.539	10.441	6.754	3	2.961	7.043	7.451	4.572	1.904	1.411	1.532	13.451	13.743	7.591	5.646	8.527	9.278	7.885	6.617	5.407	9.282	6.119	5.745	2.875	2.992	4.682
DPY19L3	ENSOARG00000004168	ENSOART00000004542.1, XM_004015134, XM_012190103	dpy-19-like 3 (C. elegans)	14:42201767-42282874:1	13.744	4.699	4.049	6.734	4.489	12.796	4.726	3.725	7.331	6.89	13.745	4.918	2.509	3.511	4.58	9.152	4.311	3.46	6.201	4.641	10.053	4.671	4.73	7.477	4.833	11.438	4.514	3.767	7.305	7.274
HSF4	ENSOARG00000002740	ENSOART00000002970.1, XM_004015057, XM_012189906, XM_012189907	heat shock transcription factor 4	14:34151662-34156560:1	6.442	8.743	5.203	2.287	3.453	12.244	10.363	6.617	3.401	9.259	6.792	7.266	4.404	2.223	2.868	13.749	10.686	10.6	6.168	8.164	8.842	8.636	6.785	4.361	8.598	7.939	7.071	5.311	3.241	6.718
PITPNM2	ENSOARG00000006283	ENSOART00000006847.1, XM_012097717	phosphatidylinositol transfer protein, membrane-associated 2	17:52108267-52145207:1	4.867	7.943	4.71	4.172	8.716	4.657	11.326	10.26	5.324	9.103	4.846	5.547	3.078	2.489	7.572	4.949	9.801	6.875	4.967	7.317	6.96	12.538	13.749	8.143	7.101	5.458	13.105	10.998	5.378	7.575
KIAA0141	101108385	XM_004008905, XM_012178656	KIAA0141 ortholog	5:50369330-50383988:1	12.276	8.855	8.559	6.743	8.787	13.587	9.728	8.07	9.682	11.014	11.56	7.11	7.054	6.985	2.993	12.536	12.7	9.804	8.921	8.299	10.626	8.782	13.755	8.846	9.583	11.364	10.39	8.825	8.252	9.561
CUL7	ENSOARG00000005094	ENSOART00000005556.1, XM_012100689	cullin 7	20:16726468-16741668:-1	12.171	8.826	6.673	6.113	9.204	9.258	6.939	4.419	5.252	10.745	13.761	9.794	5.569	7.639	7.629	9.991	8.137	7.335	7.727	9.439	11.838	10.265	7.243	8.142	10.177	10.581	8.194	5.448	5.043	10.488
SNIP1	ENSOARG00000019769	ENSOART00000021526.1, XM_004001808	Smad nuclear interacting protein 1	1:12130062-12146891:-1	10.554	10.227	8.295	10.22	7.467	11.232	9.989	11.194	13.765	9.709	13.471	8.724	8.809	11.799	6.502	10.171	10.512	9.38	11.521	6.276	9.073	8.947	7.707	10.584	6.651	12.098	7.245	7.555	10.205	6.662
LOC105605864	105605864	XM_012108030	PAX-interacting protein 1-like	JH922429.1:9043-12606:-1	6.48	5.593	7.104	2.717	7.928	7.777	10.729	7.7	6.985	13.187	13.205	5.627	2.243	5.987	6.319	5.15	2.86	8.453	4.523	6.561	9.322	6.304	7.068	5.759	9.31	9.705	11.996	8.074	3.802	13.767
OVCA2	ENSOARG00000014808	ENSOART00000016116.1	OVCA2 serine hydrolase domain containing	11:22682974-22683961:1	5.783	9.615	3.735	4.146	7.955	7.952	10.593	5.709	6.039	13.771	9.312	8.314	4.115	4.379	6.874	7.975	8.435	6.759	7.354	9.628	10.235	12.043	8.803	8.16	13.597	9.713	9.087	5.009	5.151	9.859
ENSOARG00000012314	ENSOARG00000012314	ENSOART00000013385.1	no description available	2:183092365-183097217:-1	13.785	5.538	4.787	9.801	3.755	1.851	7.802	6.438	2.132	6.259	1.521	4.49	3.84	1.3	4.807	2.762	5.45	7.044	2.161	3.894	2.223	8.033	7.844	2.031	6.299	2.459	4.981	3.278	2.311	4.524
XPO4	ENSOARG00000013784	ENSOART00000015002.1, XM_012184699, XM_012184700, XM_012184701, XM_012184702, XM_012184703, XM_012184704	exportin 4	10:35914011-35989441:1	10.649	7.826	7.123	8.146	9.133	11.491	6.275	8.605	12.276	11.802	13.613	7.028	6.325	8.846	6.527	10.95	7.531	7.308	10.008	9.204	11.219	7.487	9.349	10.835	8.402	13.785	9.356	7.904	10.685	9.851
TMEM71	ENSOARG00000006277	ENSOART00000006827.1, ENSOART00000006829.1, XM_012183547	transmembrane protein 71	9:21540291-21568112:1	7.377	5.912	3.847	3.469	4.726	4.685	3.54	2.322	3.823	4.526	13.791	8.021	3.637	4.42	1.557	4.722	8.35	6.044	7.654	2.581	10.344	8.372	4.876	8.492	8.038	9.597	4.915	2.984	3.551	10.335
FUT11	ENSOARG00000008100	ENSOART00000008822.1	fucosyltransferase 11	25:29542318-29545150:1	9.488	4.673	2.869	5.731	12.855	12.232	4.957	3.841	5.282	13.542	13.536	5.826	2.435	4.103	13.799	10.842	5.784	3.167	4.68	8.115	9.239	3.858	3.867	6.784	8.636	9.732	5.235	2.954	5.722	11.178
ENSOARG00000020912	ENSOARG00000020912	ENSOART00000022783.1	no description available	7:52384734-52388303:1	11.424	5.101	4.539	6.83	5.2	11.872	6.588	5.35	9.142	7.44	6.373	3.321	2.635	4.497	2.54	13.806	7.683	5.446	11.158	8.183	11.163	6.187	6.686	10.139	4.853	11.558	5.537	4.567	7.825	6.193
ENSOARG00000006835	ENSOARG00000006835	ENSOART00000007429.1	no description available	13:28248959-28266487:-1	8.076	4.224	1.493	1.802	1.914	2.389	2.93	1.495	0.985	2.178	13.811	6.335	2.25	4.54	6.603	4.016	2.421	2.054	4.53	3.242	2.495	1.28	0.508	1.562	2.076	2.105	1.502	1.277	1.022	1.246
MTMR3	ENSOARG00000005890	ENSOART00000006418.1, XM_004017468, XM_004017469, XM_012098035, XM_012098036, XM_012098037, XM_012098038, XM_012098039, XM_012098040, XM_012098041, XM_012098042	myotubularin related protein 3	17:68590781-68641266:1	12.475	4.318	4.182	6.927	7.653	10.129	3.733	5.125	8.009	10.523	13.811	3.812	3.055	8.318	7.685	11.588	6.029	5.744	9.66	9.783	9.098	4.525	5.579	8.647	8.819	10.434	4.338	4.43	6.928	9.522
BLM	ENSOARG00000012875	ENSOART00000014005.1, XM_004017761	Bloom syndrome, RecQ helicase-like	18:20943557-21034496:-1	10.306	2.42	1.724	3.543	4.74	9.05	3.013	3.703	6.086	9.592	9.477	2.254	1.829	4.373	2.33	6.536	2.515	2.188	6.33	5.894	12.517	5.253	5.96	9.121	7.866	13.823	5.089	5.802	8.732	9.965
KCNJ9	ENSOARG00000008135	ENSOART00000008852.1, XM_004003714	potassium channel, inwardly rectifying subfamily J, member 9	1:109433444-109441149:1	7.205	10.923	8.523	7.501	10.865	7.485	11.884	13.684	8.758	11.392	6.551	9.157	9.48	6.198	8.476	7.124	10.049	12.401	7.931	10.349	7.955	12.489	13.826	7.61	12.031	7.84	12.537	11.707	5.312	8.186
TMTC1	ENSOARG00000019564	ENSOART00000021307.1, XM_004006752, XM_012175092, XM_012175093, XM_012175094	transmembrane and tetratricopeptide repeat containing 1	3:184510218-184839473:1	1.073	1.012	0.479	0.707	0.262	2.416	2.141	1.687	1.62	4.406	1.135	1.171	0.585	1.162	0.124	8.642	6.48	5.007	6.781	5.157	13.833	12.496	10.88	9.235	6.037	5.031	4.613	4.074	2.643	2.962
FTO	ENSOARG00000017939	ENSOART00000019523.1, NM_001104931, XM_012189508, XM_012189509	fat mass and obesity associated	14:21581194-21954105:1	10.886	7.519	5.666	4.746	8.269	11.314	8.539	6.137	6.904	13.834	13.796	9.548	5.578	4.676	5.924	10.994	8.15	7.148	7.081	10.375	12.976	10.294	7.515	8.486	10.664	13.671	11.316	9.178	7.674	11.962
ISCA2	105606505	XM_012182050	iron-sulfur cluster assembly 2	7:82697454-82699528:1	6.789	8.888	8.104	8.795	10.29	8.799	11.767	12.558	10.418	7.476	9.229	6.419	8.093	9.087	4.987	7.83	7.171	10.569	9.889	8.466	9.449	8.948	13.834	11.004	9.582	10.918	10.49	12.584	10.314	9.016
2003-03-01	ENSOARG00000018055	ENSOART00000019653.1, XM_004008661	membrane-associated ring finger (C3HC4) 3, E3 ubiquitin protein ligase	5:24451984-24607162:1	2.21	1.796	4.602	3.893	1.673	2.05	5.958	13.691	10.579	1.819	2.395	5.844	12.515	11.887	3.1	3.066	6.111	13.835	8.975	3.213	2.101	2.088	2.386	2.394	2.041	1.69	4.838	7.395	5.568	2.326
MARK4	ENSOARG00000009757	ENSOART00000010618.1, XM_012095081	MAP/microtubule affinity-regulating kinase 4	14:51994141-52023491:1	6.314	11.915	8.091	5.303	6.686	8.808	13.847	10.089	6.092	9.446	7.426	10.799	7.439	5.389	7.608	6.77	10.62	8.412	6.652	6.443	6.633	7.632	6.973	5.359	5.695	6.496	11.255	9.727	5.44	6.692
SLC35C1	ENSOARG00000002331	ENSOART00000002523.1, XM_004016429, XM_004016430, XM_012096306, XM_012096308	solute carrier family 35 (GDP-fucose transporter), member C1	15:74067217-74074604:1	7.231	3.895	5.612	6.316	11.847	4.443	2.904	5.418	3.972	13.847	9.395	4.22	4.934	4.201	7.062	5.379	4.409	5.076	3.865	9.066	5.933	4.536	7.539	6.22	10.999	5.764	3.445	4.204	4.043	12.143
NCAPD3	ENSOARG00000013282	ENSOART00000014445.1, XM_012096666	non-SMC condensin II complex, subunit D3	15:80422261-80484172:-1	9.854	9.168	5.45	4.282	6.279	8.773	7.059	5.148	4.234	11.044	11.818	10.311	5.988	4.631	2.939	5.284	4.316	4.037	2.945	6.681	7.836	8.433	6.628	4.813	8.099	13.861	10.841	7.608	6.118	11.289
ENSOARG00000015098	ENSOARG00000015098	ENSOART00000016431.1	no description available	10:44186251-44188129:-1	2.818	9.915	4.728	3.394	3.482	1.681	10.256	6.797	4.181	1.931	1.38	10.004	5.895	3.674	2.577	1.541	13.871	7.712	5.207	2.352	3.53	11.367	7.102	4.268	2.941	2.219	13.419	8.008	5.495	2.897
FARP1	ENSOARG00000003037	ENSOART00000003297.1, XM_012184877	FERM, RhoGEF (ARHGEF) and pleckstrin domain protein 1 (chondrocyte-derived)	10:74563318-74800906:1	9.13	8.762	6.428	5.008	8.039	9.928	10.087	10.098	5.709	13.879	11.442	11.144	6.959	4.549	9.322	7.781	9.133	5.97	4.464	7.726	8.372	9.073	7.176	5.267	7.455	7.89	8.628	5.854	4.29	7.395
PIGS	ENSOARG00000000048	ENSOART00000000049.1, XM_012185392	phosphatidylinositol glycan anchor biosynthesis, class S	11:19639625-19651360:-1	9.648	12.049	8.493	6.403	8.391	7.752	8.736	7.464	6.039	8.767	11.329	13.246	10.833	7.589	7.371	11.793	11.335	13.878	8.448	13.879	8.701	12.113	10.721	7.599	13.25	8.927	10.753	10.057	5.987	12.062
KCTD5	ENSOARG00000018685	ENSOART00000020337.1	potassium channel tetramerization domain containing 5	24:2085032-2099728:1	9.392	8.187	8.048	13.205	7.763	6.023	9.771	12.363	13.027	7.453	8.875	5.85	6.693	11.165	6.306	7.577	7.266	11.578	10.424	8.882	8.149	8.569	11.991	10.944	7.645	9.419	8.448	9.338	13.889	8.467
NUFIP1	ENSOARG00000007556	ENSOART00000008225.1	nuclear FMR1 interacting protein 1	10:15496124-15528699:-1	9.158	11.302	11.216	9.883	6.555	7.872	11.481	13.889	11.799	8.959	9.605	12.643	8.602	7.323	4.588	6.679	11.885	7.694	6.858	5.781	7.485	8.249	10.331	9.292	6.368	8.738	9.717	9.18	10.005	8.41
LONRF1	ENSOARG00000009872	ENSOART00000010746.1, XM_012105843	LON peptidase N-terminal domain and ring finger 1	26:22954320-22980753:1	11.021	7.336	8.124	12.392	8.873	13.636	4.776	5.918	12.402	7.377	11.07	4.737	3.11	12.394	6.826	13.898	5.128	3.063	11.329	5.255	11.045	5.298	5.982	11.608	5.601	11.541	3.257	6.616	10.398	6.416
PRRG1	ENSOARG00000018910	ENSOART00000020592.1	proline rich and Gla domain 1	X:34507040-34573242:-1	6.657	4.732	7.123	13.018	7.049	6.6	5.272	9.089	13.903	4.094	9.086	5.244	6.989	10	6.888	7.815	5.278	5.663	7.936	4.232	6.304	5	7.629	12.2	6.256	4.823	3.447	4.268	10.182	4.808
TTC39C	ENSOARG00000007567	ENSOART00000008240.1, ENSOART00000008244.1, XM_012103472	tetratricopeptide repeat domain 39C	23:32856545-32899175:-1	2.641	3.421	7.044	10.168	6.464	1.677	5.423	10.291	13.908	1.96	2.693	3.865	10.138	12.274	3.581	2.816	4.484	4.296	4.783	2.835	2.013	2.705	2.886	4.026	2.249	3.284	4.168	7.153	11.35	3.446
ATG4B	ENSOARG00000017628	ENSOART00000019185.1, XM_012105921	autophagy related 4B, cysteine peptidase	1:193952-206502:-1	7.351	10.867	9.284	7.565	10.146	7.644	11.595	12.732	10.589	13.259	8.346	8.516	6.511	6.123	8.033	7.819	10.386	11.588	8.932	9.955	8.568	13.507	13.909	9.929	9.678	9.348	13.076	11.343	9.59	10.664
HERC1	ENSOARG00000020775	ENSOART00000022636.1, XM_004010540, XM_012181377, XM_012181378, XM_012181379, XM_012181381, XM_012181382, XM_012181383, XM_012181384, XM_012181385, XM_012181386, XM_012181387, XM_012181388	HECT and RLD domain containing E3 ubiquitin protein ligase family member 1	7:43272270-43433335:1	11.424	3.824	1.687	3.407	4.826	12.314	3.515	2.131	4.406	6.782	13.909	5.157	2.02	4.441	3.538	12.334	4.839	3.195	6.843	5.193	13.344	4.789	3.165	6.296	6.473	11.29	4.261	2.194	4.613	6.818
CLOCK	ENSOARG00000001602	ENSOART00000001733.1, NM_001130932, XM_012179337, XM_012179339, XM_012179340, XM_012179341	clock circadian regulator	6:70873036-70930701:-1	11.541	4.369	4.221	10.052	7.6	12.384	4.569	5.143	13.91	8.391	13.649	4.149	3.375	9.843	8.918	10.488	5.814	4.361	12.788	6.343	10.657	6.293	5.844	11.732	7.073	12.811	5.307	5.931	11.883	8.653
RESF1	ENSOARG00000019391	ENSOART00000021117.1	retroelement silencing factor 1	3:182637046-182646738:-1	9.528	3.78	2.722	5.883	2.185	12.8	3.661	4.463	8.36	4.192	10.54	5.202	4.126	8.614	2.652	12.051	9.277	5.574	13.914	4.464	9.726	6.482	4.915	9.252	3.162	10.187	5.558	3.066	8.42	3.002
SAV1	ENSOARG00000020654	ENSOART00000022502.1	salvador family WW domain containing protein 1	7:40594745-40621621:-1	8.302	4.848	8.504	7.714	7.618	6.999	7.157	13.921	8.622	10.252	7.084	4.668	11.328	8.055	7.25	5.955	10.784	12.953	8.366	5.529	6.504	6.9	7.387	7.143	6.636	6.758	5.625	10.113	8.759	6.956
PIAS3	ENSOARG00000020605	ENSOART00000022448.1, XM_012179957	protein inhibitor of activated STAT, 3	1:98211933-98219345:-1	6.124	5.765	5.189	5.122	13.929	5.869	4.798	5.605	6.219	13.515	6.606	5.398	3.342	5.454	12.438	5.602	7.034	6.375	6.327	9.91	6.943	6.597	7.561	7.572	12.61	7.228	6.886	5.695	6.234	13.538
VPS52	ENSOARG00000008970	ENSOART00000009777.1, XM_012100478, XM_012100479, XM_012100481, XM_012100482	vacuolar protein sorting 52 homolog (S. cerevisiae)	20:7529532-7544135:-1	9.891	8.899	6.641	6.444	9.527	10.118	10.092	8.943	9.769	13.93	13.043	9.493	6.397	7.2	8.12	9.973	8.997	8.444	10.118	11.033	11.404	10.56	11.89	11.256	11.574	11.307	9.706	7.558	8.026	10.47
PHYKPL	ENSOARG00000006386	ENSOART00000006947.1, XM_012178325, XM_012178326, XM_012178327	5-phosphohydroxy-L-lysine phospho-lyase	5:36771073-36794528:-1	10.247	9.611	6.96	5.868	8.724	11.78	10.017	8.064	6.883	11.981	13.933	9.212	6.304	5.154	6.976	13.149	10.26	9.092	8.421	12.47	9.814	7.888	7.091	5.801	6.697	10.362	9.271	7.777	6.618	9.474
APBA3	ENSOARG00000011823	ENSOART00000012859.1, XM_004008607	amyloid beta (A4) precursor protein-binding, family A, member 3	5:17776573-17783984:1	7.699	7.283	5.564	5.222	11.325	7.777	7.912	7.509	7.11	13.936	9.707	7.641	4.936	6.73	11.351	6.863	6.104	6.941	6.91	10.025	8.487	8.802	7.801	10.282	11.025	8.412	7.754	6.405	7.355	10.63
MAP1S	ENSOARG00000015551	ENSOART00000016919.1, XM_012179098	microtubule-associated protein 1S	5:5136389-5172323:-1	4.394	4.897	3.737	2.853	12.436	3.82	5.373	5.163	2.706	13.941	5.29	3.59	2.203	2.397	10.393	3.956	4.696	3.928	2.735	9.796	4.949	6.461	9.643	3.945	10.451	4.354	5.103	5.972	2.814	11.252
ENSOARG00000008725	ENSOARG00000008725	ENSOART00000009505.1	ligand dependent nuclear receptor corepressor	22:17461260-17469074:1	7.009	3.501	6.078	11.903	4.241	7.82	4.566	8.102	12.562	5.339	7.823	2.414	6.423	13.944	5.853	6.472	3.475	5.91	12.068	3.419	7.383	3.179	5.355	8.751	4.683	8.595	2.937	5.541	10.455	5.761
PBRM1	ENSOARG00000002751	ENSOART00000002985.1, ENSOART00000002987.1, XM_004018396, XM_004018398, XM_012099937, XM_012099938, XM_012099939, XM_012099941, XM_012099942, XM_012099943, XM_012099944, XM_012099945, XM_012099946, XM_012099947, XM_012099948, XM_012099949, XM_012099950, XM_012099951	polybromo 1	19:48156541-48254203:1	12.34	9.848	8.121	9.281	9.808	11.221	9.649	9.699	11.248	13.72	13.944	12.493	8.245	9.748	8.769	10.022	9.008	8.25	10.439	9.644	10.28	9.772	10.722	8.826	9.642	12.613	10.69	9.766	9.62	13.048
TBC1D22A	101112129	XM_012176189	TBC1 domain family, member 22A	3:221152277-221345635:1	12.877	11.935	8.267	9.131	12.102	12.631	11.583	9.442	8.304	13.944	13.22	11.063	7.324	8.855	8.662	12.579	12.04	12.163	13.38	11.304	12.172	11.287	11.647	10.98	12.063	11.137	9.019	8.615	8.57	10.37
CHAMP1	ENSOARG00000009132	ENSOART00000009939.1, XM_004012243, XM_012184979, XM_012184980	chromosome alignment maintaining phosphoprotein 1	10:86428726-86438214:1	9.186	6.562	7.494	6.091	8.859	8.833	7.571	11.05	7.392	13.949	12.448	9.789	8.761	7.515	8.881	9.105	7.323	8.465	7.112	10.003	8.307	7.807	8.367	7.38	10.075	10.557	7.314	8.601	6.804	12.525
CLCN4	ENSOARG00000010254	ENSOART00000011153.1	chloride voltage-gated channel 4	X:7147216-7215572:-1	10.633	5.514	4.294	5.489	10.548	8.957	4.877	2.991	4.85	10.258	13.95	8.593	5.002	5.924	13.804	4.826	3.779	2.977	3.521	5.122	5.612	3.298	3.207	4.601	5.197	10.499	5.856	3.635	5.626	8.685
ACYP2	105608759	XM_012171554	acylphosphatase 2, muscle type	3:69650608-69835314:-1	11.837	7.943	9.215	9.709	9.831	12.34	10.049	7.993	6.013	10.973	13.164	13.524	10.703	7.491	11.489	13.307	8.792	10.202	9.525	13.142	10.395	12.231	6.775	12.059	11.504	13.005	6.602	8.446	9.165	13.952
ENSOARG00000011847	ENSOARG00000011847	ENSOART00000012888.1	no description available	6:113502984-114772068:-1	4.025	4.449	4.746	2.802	5.429	4.331	5.879	7.803	4.717	7.493	3.841	4.388	9.88	6.496	13.952	3.511	2.32	6.634	5.029	4.959	3.254	2.192	2.613	3.084	2.638	4.642	2.748	2.872	2.306	3.723
MEGF9	ENSOARG00000005705	ENSOART00000006215.1	multiple EGF like domains 9	2:2775352-2853981:1	13.964	6.017	4.821	7.312	9.472	7.133	4.744	5.784	6.063	8.02	8.791	5.691	3.649	5.742	9.379	8.537	8.649	7.136	9.839	6.762	9.304	5.72	7.869	9.34	7.841	7.733	4.876	5.046	6.652	7.605
P4HA3	ENSOARG00000009683	ENSOART00000010542.1	prolyl 4-hydroxylase subunit alpha 3	15:51819063-51859671:-1	6.45	6.741	4.712	5.762	11.531	9.89	6.219	5.709	5.2	13.964	7.854	4.133	2.583	2.21	2.554	3.161	1.457	0.853	1.874	4.927	6.161	4.073	3.831	5.976	5.187	6.409	3.663	2.296	3.471	9.471
TMEM245	ENSOARG00000007057	ENSOART00000007681.1, XM_012114042, XM_012114047, XM_012114055	transmembrane protein 245	2:14156048-14222224:1	8.203	3.258	1.729	2.875	1.984	10.017	3.545	2.974	5.88	3.985	10.016	3.905	1.598	2.574	0.578	13.991	7.392	3.971	6.391	4.055	11.867	5.197	4.158	6.392	5.072	10.965	4.494	2.788	5.277	5.008
IDI1	ENSOARG00000014785	ENSOART00000016093.1	isopentenyl-diphosphate delta isomerase 1	13:45500106-45502962:1	8.423	11.774	9.562	9.379	7.586	7.45	10.921	7.518	6.015	9.847	7.438	12.113	10.02	4.834	2.881	10.608	12.111	14	8.225	6.875	5.441	9.95	11.56	6.225	7.427	8.801	10.436	6.858	7.761	9.548
LOC101116597	101116597	XM_012094883, XM_012094884, XM_012094885, XM_012094886, XM_012094887, XM_012094888, XM_012094889	zinc finger protein OZF-like	14:61937065-61944796:-1	13.019	5.194	6.637	6.786	6.225	11.701	5.003	6.779	10.212	9.709	14.009	4.217	4.791	8.07	5.444	9.525	5.657	5.558	9.814	5.886	9.813	4.973	5.387	9.042	7.073	9.336	3.883	4.153	7.386	6.093
POFUT1	ENSOARG00000003311	ENSOART00000003591.1, XM_012189026, XM_012189028	protein O-fucosyltransferase 1	13:61006498-61020298:1	10.691	9.225	6.171	7.347	9.978	9.17	8.41	9.865	10.072	10.945	12.406	8.902	7.833	5.875	5.684	9.462	8.47	8.045	8.29	10.445	12.767	10.81	9.099	10.541	12.244	11.039	10.54	9.385	8.678	14.011
ORAI2	ENSOARG00000014445	ENSOART00000015726.1, XM_004020984, XM_012104491, XM_012104492, XM_012104493, XM_012104494, XM_012104495, XM_012104496, XM_012104497	ORAI calcium release-activated calcium modulator 2	24:34500687-34509676:-1	7.07	7.222	6.595	4.337	7.174	7.01	9.432	6.662	4.051	11.803	8.725	7.534	5.056	3.519	7.319	6.523	8.543	9.521	6.863	7.976	5.585	9.123	8.926	6.521	14.02	6.557	9.869	7.497	5.219	8.493
SARM1	ENSOARG00000018123	ENSOART00000019725.1, XM_012185388	sterile alpha and TIR motif containing 1	11:19483885-19505994:1	6.689	8.836	4.065	3.096	5.023	7.623	9.929	4.718	2.468	11.177	8.706	8.746	3.78	1.997	2.999	6.996	8.226	5.591	5.057	7.686	10.126	10.502	8.555	6.798	14.02	8.807	9.404	4.656	3.905	12.317
WRN	ENSOARG00000000163	ENSOART00000000167.1, XM_012105886, XM_012105887, XM_012105888, XM_012105889, XM_012105890, XM_012105891	Werner syndrome, RecQ helicase-like	26:25835749-25925600:1	12.52	4.93	3.689	6.27	4.661	13.702	5.618	4.622	8.42	8.544	12.597	5.78	2.735	4.659	3.605	13.751	5.97	4.528	9.08	7.571	13.45	5.867	5.605	9.928	8.698	14.026	5.426	4.948	8.8	9.32
SLC25A12	ENSOARG00000001611	ENSOART00000001740.1, ENSOART00000001743.1, XM_004004597, XM_012133795, XM_012133814, XM_012133822	solute carrier family 25 (aspartate/glutamate carrier), member 12	2:136802932-136868011:1	9.472	6.04	4.194	4.311	8.127	7.795	5.578	4.45	8.191	10.412	12.694	6.328	3.458	3.278	5.034	6.207	5.87	4.274	6.387	7.703	11.645	7.58	7.795	9.016	8.76	14.043	8.753	6.799	8.036	10.681
TRAPPC10	ENSOARG00000011590	ENSOART00000012609.1, ENSOART00000012616.1, XM_004003376, XM_012104309, XM_012104321, XM_012104328	trafficking protein particle complex 10	1:262163238-262220875:1	12.785	7.848	6.476	7.523	10.185	13.059	7.524	7.077	8.29	12.93	14.044	7.589	4.969	8.605	8.113	10.86	8.247	7.237	8.855	8.855	11.898	8.634	7.492	8.708	8.657	13.35	10.383	8.658	8.489	10.518
AKR1E2	ENSOARG00000012747	ENSOART00000013863.1, XM_012188628, XM_012188629, XM_012188630, XM_012188631, XM_012188632, XM_012188633, XM_012188634, XM_012188635, XM_012188636, XM_012188637	aldo-keto reductase family 1, member E2	13:43029849-43042349:-1	12.463	9.751	6.903	10.931	10.163	11.644	11.643	11.424	9.821	9.244	8.744	8.45	7.58	7.325	7.6	9.938	12.311	14.045	9.328	11.596	9.652	10.673	11.278	9.25	10.651	10.777	12.763	11.304	9.472	11.368
ARID5B	ENSOARG00000004403	ENSOART00000004794.1, XM_004021392, XM_004021393, XM_012105121, XM_012105122, XM_012105123	AT rich interactive domain 5B (MRF1-like)	25:17931071-17988979:1	8.651	2.76	2.501	6.211	6.343	14.048	3.22	6.816	13.924	5.181	8.7	2.777	3.333	10.882	4.663	13.381	2.767	4.422	11.616	4.512	12.107	3.353	5.239	10.64	4.789	9.903	3.941	4.439	7.919	4.777
VPS4A	101112669	XM_012095004	vacuolar protein sorting 4 homolog A (S. cerevisiae)	14:35797231-35805818:1	13.568	9.9	3.838	11.537	6.94	14.05	9.856	9.816	9.753	12.779	14.009	6.634	5.428	8.772	9.98	12.307	2.395	7.876	13.639	4.905	7.838	7.183	10.989	9.852	7.772	10.728	5.239	11.161	7.952	11.33
WDR20	ENSOARG00000003998	ENSOART00000004343.1, XM_004017996, XM_004017997, XM_004017998, XM_004018000, XM_012099062, XM_012099064, XM_012099065	WD repeat domain 20	18:65684323-65740888:1	12.027	5.54	8.345	11.861	7.685	11.601	7.066	10.547	11.351	11.395	14.05	5.755	7.595	10.948	7.723	10.942	8.25	14.022	11.75	10.789	10.488	9.205	11.168	11.356	8.156	11.601	7.164	7.558	9.572	9.068
APC	ENSOARG00000016130	ENSOART00000017570.1, XM_012180614, XM_012180615, XM_012180616, XM_012180617, XM_012180618	adenomatous polyposis coli	7:887181-969776:-1	13.397	5.786	4.84	8.862	7.85	11.644	5.898	8.675	14.055	9.425	13.121	4.458	5.077	8.837	6.469	11.34	5.297	5.556	11.86	6.324	10.887	5.378	6.248	9.232	5.743	13.658	5.048	5.683	10.933	9.533
EEF1AKMT3	ENSOARG00000005186	ENSOART00000005645.1	EEF1A lysine methyltransferase 3	3:161590355-161596353:-1	2.27	4.163	3.995	3.882	4.48	2.829	9.2	14.067	10.976	3.785	2.4	2.403	6.907	5.264	3.139	3.251	9.412	9.579	5.903	3.807	3.67	7.265	8.938	6.454	3.842	3.072	5.378	6.651	7.011	2.891
C12H1orf112	101109467	XM_012187250, XM_012187251	chromosome 12 open reading frame, human C1orf112	12:35606459-35656912:1	8.089	3.899	2.759	2.887	2.819	8.778	3.443	2.546	3.732	6.173	10.456	4.089	1.938	2.933	1.277	6.85	3.052	1.785	2.923	4.835	11.309	6.166	3.989	5.867	7.406	14.08	6.673	4.27	5.333	8.408
ENSOARG00000003627	ENSOARG00000003627	ENSOART00000003936.1	no description available	16:3634928-3639851:1	1.601	5.034	14.089	7.854	5.249	0	1.82	2.516	4.72	0.48	0.239	3.818	6.526	9.427	1.217	0.173	3.253	5.569	5.967	3.517	1.143	4.283	5.52	6.137	3.487	0.61	1.409	5.064	5.11	0.365
ALG3	ENSOARG00000020606	ENSOART00000022449.1, XM_004003094	ALG3, alpha-1,3- mannosyltransferase	1:201135230-201140774:1	5.313	6.777	5.818	4.336	8.775	5.447	7.485	9.784	6.75	14.117	7.221	8.228	7.18	4.061	6.302	5.027	7.298	6.192	4.833	10.883	7.467	10.828	10.473	7.679	12.526	7.807	10.488	9.704	6.77	12.642
TTF1	ENSOARG00000006189	ENSOART00000006733.1, XM_004023583	transcription termination factor, RNA polymerase I	3:4379958-4408585:1	13.464	7.736	7.357	9.653	7.727	14.117	6.907	9.251	12.115	10.06	11.567	7.109	7.771	10.338	6.672	11.92	8.551	8.566	11.519	9.306	13.628	8.413	7.574	10.6	10.136	13.012	6.81	7.384	10.86	10.084
NEK1	ENSOARG00000015519	ENSOART00000016889.1, XM_012129608, XM_012129611, XM_012129622, XM_012129631, XM_012129642, XM_012129647, XM_012129651	NIMA-related kinase 1	2:110414143-110526612:1	12.414	6.109	3.643	4.471	6.92	11.744	6.084	3.997	5.566	9.612	14.12	8.494	3.732	4.715	5.279	9.255	4.983	3.732	5.863	6.346	11.971	7.026	4.667	6.965	7.85	14.077	7.691	5.337	7.585	10.903
TNK2	101122917	XM_012096268	tyrosine kinase, non-receptor, 2	1:188864164-188885248:-1	11.778	8.767	5.862	3.049	8.398	6.529	6.99	4.535	3.047	14.122	9.853	10.379	3.582	2.175	4.903	7.024	8.615	5.393	5.242	8.237	6.505	8.526	6.259	4.268	8.794	8.336	8.155	3.309	2.854	13.501
NAT10	ENSOARG00000018290	ENSOART00000019907.1, ENSOART00000019908.1, XM_012096202	N-acetyltransferase 10 (GCN5-related)	15:62892758-62931212:1	5.712	5.141	6.787	5.914	2.834	4.872	5.794	14.123	10.246	6.492	8.149	4.732	7.064	3.73	2.107	6.002	6.227	6.021	6.35	5.431	5.902	7.759	12.895	8.487	6.636	7.643	6.481	9.517	9.758	6.114
ENSOARG00000020100	ENSOARG00000020100	ENSOART00000021883.1	no description available	JH924806.1:1030-1761:-1	0.001	0	0	0	1.945	2.357	0	0	1.826	14.124	0	0.001	0.179	0	0	0	0.008	0	0.474	0	0	0	0.001	0.707	0	0	0	0	0	0.082
PIAS4	ENSOARG00000010988	ENSOART00000011955.1	protein inhibitor of activated STAT 4	5:17547009-17565129:-1	10.584	9.553	9.878	8.699	11.125	10.111	8.302	12.345	10.825	13.745	11.948	7.355	5.737	9.787	9.152	10.58	8.861	9.566	11.083	10.953	11.079	10.802	14.132	13.267	13.196	12.349	10.114	12.187	10.075	13.281
RSC1A1	ENSOARG00000005234	ENSOART00000005704.1	regulator of solute carriers 1	12:49944185-49946038:-1	2.81	2.271	6.626	8.66	0.518	5.075	4.863	14.132	7.768	0	1.805	0.158	5.788	3.357	3.383	4.863	0.217	6.622	7.827	0.029	3.485	0	0.008	4.172	0.255	0.136	0	7.617	6.796	5.337
DUSP16	ENSOARG00000020857	ENSOART00000022723.1, XM_012176114	dual specificity phosphatase 16	3:202122394-202213673:1	5.969	5.887	5.424	6.437	3.968	3.982	4.345	2.777	3.986	3.447	6.93	7.632	7.409	6.268	5.06	3.295	14.136	5.648	7.73	3.04	3.807	5.462	4.291	5.041	3.709	3.952	4.206	3.783	4.176	4.024
LOC105602975	105602975	XM_012098123	U3 small nucleolar ribonucleoprotein protein IMP3-like	17:69872322-69873336:-1	9.152	5.878	7.541	10.563	8.477	9.148	7.254	10.54	14.137	9.51	11.133	4.708	4.871	9.038	4.125	9.236	4.684	8.903	10.229	6.826	8.765	6.777	12.778	12.394	7.574	9.55	5.638	9.026	11.196	5.282
INPP5K	ENSOARG00000012783	ENSOART00000013899.1, XM_012185454, XM_012185455	inositol polyphosphate-5-phosphatase K	11:22245407-22264608:-1	12.942	10.481	6.398	5.838	8.114	14.141	11.243	7.2	5.825	12.567	13.886	10.01	6.286	6.896	6.89	12.229	10.936	9.78	9.365	10.549	11.529	10.019	8.678	6.631	10.475	12.481	10.008	6.533	5.89	10.291
PRKCI	ENSOARG00000000320	ENSOART00000000347.1, XM_012099411, XM_012099417	protein kinase C, iota	1:215136819-215206323:-1	7.128	3.056	2.48	4.445	1.832	10.504	4.092	3.814	7.367	5.441	14.149	5.346	3.707	6.092	2.254	8.827	3.986	4.413	8.885	3.941	11.406	4.932	3.979	7.855	4.68	13.027	4.552	3.991	7.539	6.806
FBXW7	ENSOARG00000004146	ENSOART00000004512.1, ENSOART00000004513.1, XM_004017195, XM_004017196, XM_004017197, XM_012097357, XM_012097358, XM_012097359, XM_012097360, XM_012097361, XM_012097362	F-box and WD repeat domain containing 7, E3 ubiquitin protein ligase	17:5148871-5187342:1	11.457	5.429	6.916	11.364	7.536	13.007	5.497	8.061	14.091	8.969	10.548	5.628	5.393	9.685	5.476	13.144	8.764	5.985	11.984	8.171	11.59	5.616	8.895	14.152	6.505	12.057	6.429	8.464	13.384	8.233
GGA3	ENSOARG00000010913	ENSOART00000011871.1, XM_004013129	golgi-associated, gamma adaptin ear containing, ARF binding protein 3	11:55233061-55247018:1	7.613	10.6	8.969	7.156	10.66	8.31	11.265	11.773	7.878	14.166	8.836	8.13	8.835	7.711	9.932	7.045	10.511	12.217	8.602	10.978	7.692	11.26	13.756	9.638	11.639	7.289	10.813	10.632	7.731	11.514
ENSOARG00000014791	ENSOARG00000014791	ENSOART00000016098.1	no description available	17:26659473-26660796:-1	8.903	7.538	4.822	4.912	8.033	6.998	7.056	4.321	5.51	14.171	10.881	8.983	4.919	6.679	5.462	5.707	4.932	5.39	5.804	8.675	8.198	8.909	8.897	8.036	9.491	9.472	9.978	7.024	6.268	9.816
FNBP1L	ENSOARG00000016857	ENSOART00000018359.1, ENSOART00000018362.1, XM_012176492, XM_012176503, XM_012176510	formin binding protein 1-like	1:69861388-69917650:1	5.239	4.641	5.694	4.983	4.808	4.598	12.699	14.171	11.055	7.128	4.58	7.79	10.105	11.852	5.58	3.198	8.833	12.545	10.738	4.438	4.784	5.073	4.868	5.074	4.755	4.35	4.598	4.802	4.451	5.211
HDAC6	ENSOARG00000011812	ENSOART00000012864.1, ENSOART00000012866.1, XM_012106749, XM_012106750, XM_012106751, XM_012106752, XM_012106753, XM_012106754, XM_012106755, XM_012106757	histone deacetylase 6	X:52974706-52992531:-1	12.29	10.182	6.189	5.092	6.71	13.529	9.359	6.202	5.162	12.653	14.178	10.391	5.686	4.421	5.169	10.93	7.112	5.342	5.153	7.553	13.749	10.388	6.632	7.528	9.255	13.677	10.563	6.763	5.218	11.607
SART3	ENSOARG00000018082	ENSOART00000019681.1, XM_012097955, XM_012097956, XM_012097957	squamous cell carcinoma antigen recognized by T cells 3	17:64053337-64082127:1	9.247	9.228	9.934	8.055	8.765	8.171	9.797	12.423	10.291	12.417	12.166	8.205	9.902	10.071	8.363	7.745	8.941	11.783	9.256	9.705	9.007	11.178	14.179	9.451	10.319	9.048	9.33	11.368	8.104	11.331
VSTM5	ENSOARG00000002023	ENSOART00000002177.1, XM_012102261	V-set and transmembrane domain containing 5	21:386757-485724:1	9.985	10.792	5.646	6.314	14.041	10.963	9.264	8.241	9.202	13.766	9.758	4.753	4.514	7.138	8.592	10.881	7.547	11.853	12.937	13.592	14.183	9.845	8.566	10.111	12.972	10.781	7.365	5.959	6.918	11.303
TIAM1	ENSOARG00000014016	ENSOART00000015270.1, XM_004002771	T-cell lymphoma invasion and metastasis 1	1:122442025-122678875:1	6.564	5.336	1.925	2.324	7.513	6.29	6.438	6.967	5.184	4.199	5.532	4.129	1.966	1.925	3.976	10.446	14.185	7.51	6.817	7.401	9.273	9.065	11.015	8.737	10.527	8.481	7.273	8.685	9.012	10.779
ZC3HC1	ENSOARG00000004907	ENSOART00000005344.1, XM_004008059, XM_012177115	zinc finger, C3HC-type containing 1	4:93860101-93876333:-1	11.569	10.244	8.41	6.853	10.942	10.74	11.059	10.617	9.932	14.185	11.849	8.625	7.072	8.361	6.804	9.382	9.5	10.646	8.549	11.347	11.092	11.566	12.445	9.205	11.918	11.909	11.084	9.557	8.57	13.279
TRAPPC11	ENSOARG00000007276	ENSOART00000007929.1, XM_004021689	trafficking protein particle complex 11	26:13111501-13148525:1	12.431	5.06	4.83	6.062	8.663	9.894	4.594	6.732	7.896	11.208	13.968	6.36	5.145	10.145	8.267	10.118	6.747	6.307	9.56	10.029	13.814	6.882	7.207	11.359	12.276	14.193	6.646	5.26	8.697	12.944
TIMELESS	ENSOARG00000008907	ENSOART00000009716.1, NM_001128153	timeless circadian clock	3:162884010-162897249:1	9.184	4.838	1.86	2.466	5.682	8.278	3.774	1.783	1.985	10.362	14.199	4.908	2.22	2.517	3.979	6.669	3.165	1.893	2.025	7.118	8.01	4.242	3.141	3.315	8.203	10.559	4.225	2.68	2.803	7.99
EDC3	ENSOARG00000003476	ENSOART00000003774.1, XM_004017852, XM_012098695	enhancer of mRNA decapping 3	18:32888291-32943291:1	8.96	10.999	11.156	8.993	10.443	8.075	12.444	14.19	10.808	13.998	11.425	12.388	12.558	10.677	9.513	7.243	9.209	13.54	11.405	10.674	9.896	12.642	14.207	10.47	11.634	11.156	11.436	12.246	10.431	11.135
KDM4B	ENSOARG00000008388	ENSOART00000009136.1, XM_012178057	lysine (K)-specific demethylase 4B	5:16685990-16788046:-1	6.799	8.124	6.17	4.946	13.197	8.647	8.716	6.386	5.779	14.208	8.921	7.941	6.413	5.823	13.153	9.986	10.783	6.856	6.082	11.788	8.353	8.848	8.511	8.752	13.194	6.736	7.211	6.647	6.28	13.101
MPPE1	ENSOARG00000001718	ENSOART00000001850.1, XM_012103590	metallophosphoesterase 1	23:43089851-43104160:-1	13.676	10.453	6.328	6.654	10.955	10.999	6.551	4.625	6.871	12.665	11.969	8.309	3.263	3.858	7.801	12.732	11.329	8.116	11.179	11.429	14.209	11.377	9.753	10.904	11.835	10.466	7.032	4.317	5.56	9.449
DLGAP4	ENSOARG00000015685	ENSOART00000017072.1, XM_012189145	discs, large (Drosophila) homolog-associated protein 4	13:65056026-65202208:1	3.791	9.806	9.534	5.319	10.085	4.367	12.516	11.623	5.161	9.003	4.372	8.382	6.041	4.072	11.285	4.961	10.712	12.85	6.772	10.179	5.09	9.958	10.937	7.596	9.096	5.11	12.831	14.213	7.133	9.041
SNTB2	ENSOARG00000003518	ENSOART00000003828.1, XM_012095003	syntrophin, beta 2 (dystrophin-associated protein A1, 59kDa, basic component 2)	14:35721279-35793085:1	8.927	7.899	5.815	7.954	7.725	10.376	9.241	12.42	12.5	10.216	9.439	5.957	8.292	11.23	8.28	8.424	6.269	9.744	14.213	6.236	10.697	7.609	9.337	10.418	7.615	11.995	7.285	8.706	11.251	8.52
LOC105616842	105616842	XM_012189662	piezo-type mechanosensitive ion channel component 1-like	14:13481711-13484645:-1	4.042	10.229	10.536	4.671	11.982	4.74	14.214	12.894	2.775	11.95	4.599	13.554	9.649	3.122	9.37	5.017	10.317	11.175	3.022	6.782	3.05	12.254	11.645	4.7	9.615	2.679	13.338	11.782	3.148	10.217
PRMT7	ENSOARG00000003409	ENSOART00000003706.1	protein arginine methyltransferase 7	14:35021593-35056800:1	12.481	8.446	6.672	9.32	8.424	11.049	6.658	8.037	13.515	9.869	13.884	7.044	4.81	7.239	4.171	10.861	7.041	6.378	9.213	6.775	14.217	9.097	11.635	14.04	10.425	14.13	8.557	8.129	12.888	9.774
POLD1	ENSOARG00000013923	ENSOART00000015166.1, XM_012095138	polymerase (DNA directed), delta 1, catalytic subunit	14:55588762-55613029:1	6.912	9.147	3.351	2.017	7.477	6.225	8.297	3.471	1.426	14.226	9.123	10.038	3.282	1.468	4.013	5.569	5.35	3.425	1.757	9.786	6.948	8.703	5.033	2.531	11.394	7.053	8.73	3.865	2.011	10.983
SLC20A2	ENSOARG00000003451	ENSOART00000003757.1, XM_012106090	solute carrier family 20 (phosphate transporter), member 2	26:35743212-35853736:-1	9.247	9.08	8.512	14.237	14.045	8.154	8.897	7.916	9.922	7.778	8.301	6.96	6.948	9.082	8.234	8.536	10.221	7.134	6.608	8.056	8.553	8.8	9.386	12.768	8.266	9.632	9.128	8.884	11.708	10.242
ENSOARG00000015810	ENSOARG00000015810	ENSOART00000017212.1	coiled-coil domain containing 115	2:113092848-113095824:-1	5.226	5.208	3.652	2.269	2.26	14.241	14.047	10.637	9.278	12.466	11.806	8.259	5.138	5.561	4.113	12.112	8.993	6.098	6.846	8.035	4.555	7.023	6.86	4.483	4.003	6.246	4.536	5.077	4.952	3.734
TTLL7	ENSOARG00000013727	ENSOART00000014947.1, XM_012174667, XM_012174675, XM_012174686, XM_012174694, XM_012174699	tubulin tyrosine ligase-like family member 7	1:60240594-60388705:-1	7.338	2.482	1.759	3.618	4.354	11.187	4.025	4.625	10.823	6.865	6.436	2.039	0.97	2.3	2.54	9.199	4.543	4.402	10.575	6.065	12.407	4.622	5.725	14.244	8.538	13.166	4.727	4.213	12.4	8.729
CDC25C	ENSOARG00000016166	ENSOART00000017608.1, ENSOART00000017612.1, XM_012178576, XM_012178577	cell division cycle 25C	5:47083705-47121605:-1	9.51	5.511	4.74	6.725	4.275	7.552	4.293	3.984	7.203	7.731	14.246	7.698	4.917	7.581	2.707	6.172	2.771	2.678	4.398	4.854	11.028	7.483	6.367	9.725	8.247	11.765	6.784	6.615	10.547	7.947
LOC101111082	101111082	XM_012157663	chloride channel protein ClC-Ka	2:248884834-248897749:1	6.611	0.12	0.022	14.248	0.018	1.032	0.086	0.078	0.899	0	0.905	0	0.034	0.663	0.018	1.721	0.038	0.03	1.242	0.021	1.142	0	0	1.119	0	0.875	0.134	0.041	1.205	0
NHLRC2	ENSOARG00000013687	ENSOART00000014894.1, XM_012102958	NHL repeat containing 2	22:33262529-33320436:1	11.528	6.383	5.491	12.309	6.685	11.782	5.53	7.676	13.376	6.511	11.048	5.182	4.944	11.906	5.379	11.529	5.738	6.327	13.705	6.116	13.098	6.72	7.884	11.919	6.912	14.252	6.485	6.447	11.3	8.343
SYNJ1	ENSOARG00000013414	ENSOART00000014616.1, XM_012186317	synaptojanin 1	1:121075883-121170348:1	10.8	6.776	5.497	5.288	7.132	14.257	5.602	7.797	4.809	12.766	13.482	8.668	7.494	6.455	7.672	13.439	8.323	9.049	8.317	12.593	11.098	6.792	9.009	8.554	12.21	11.252	5.147	4.688	5.513	12.519
CDK5RAP1	ENSOARG00000007566	ENSOART00000008238.1, XM_012189072	CDK5 regulatory subunit associated protein 1	13:62283545-62322055:-1	12.386	8.366	7.036	7.951	8.019	12.973	8.278	10.091	14.264	11.565	12.709	7.247	5.928	10.084	4.894	11.83	8.711	8.22	11.113	8.787	14.022	8.841	9.875	11.399	8.802	14.127	8.138	9.482	10.475	8.794
ATG4D	ENSOARG00000016386	ENSOART00000017847.1, XM_012177888	autophagy related 4D, cysteine peptidase	5:12736715-12744918:1	9.181	7.264	6.993	9.693	14.27	7.576	7.387	5.881	7.771	11.175	10.841	7.103	5.991	9.916	12.607	7.138	6.964	9.588	10.167	8.457	8.763	9.365	8.888	9.962	7.687	10.917	10.485	7.47	8.706	9.851
PLCG2	ENSOARG00000008988	ENSOART00000009806.1, XM_012189603, XM_012189604	phospholipase C, gamma 2 (phosphatidylinositol-specific)	14:7742660-7885808:1	12.373	11.271	6.509	6.841	8.614	13.828	10.301	5.349	6.689	11.964	13.414	8.619	3.94	3.726	7.555	13.616	12.986	6.293	6.479	8.521	10.993	10.664	6.893	7.048	9.022	14.273	10.671	6.941	7.256	11.718
XRCC5	ENSOARG00000019366	ENSOART00000021091.1	X-ray repair cross complementing 5	2:217109475-217195146:1	10.176	5.221	3.424	3.812	5.581	10.007	5.384	4.7	5.698	9.161	11.592	6.337	3.227	3.794	3.231	10.051	6.143	4.745	7.623	7.91	14.274	8.333	5.634	7.941	9.842	13.705	7.809	5.386	6.203	8.542
WAPAL	101114585	XM_012105452, XM_012105453, XM_012105454, XM_012105455	wings apart-like homolog (Drosophila)	25:40750871-40825702:-1	11.014	4.812	5.115	6.1	3.83	14.283	5.657	9.082	11.564	10.61	11.261	4.428	2.37	8.239	3.703	6.174	4.821	5.865	7.741	4.011	8.752	4.387	6.139	8.028	3.999	10.647	5.869	4.37	6.357	4.218
ST3GAL3	ENSOARG00000000515	ENSOART00000000553.1, XM_004001884, XM_004001885, XM_012119300, XM_012119457	ST3 beta-galactoside alpha-2,3-sialyltransferase 3	1:18149206-18332726:1	10.237	13.117	10.112	4.383	14.287	4.826	6.582	3.765	1.933	8.517	7.793	7.559	4.794	1.3	4.488	4.227	5.904	5.149	2.208	6.372	4.814	7.745	4.713	3.024	6.968	6.17	9.918	6.524	3.372	11.459
TRAF6	ENSOARG00000019079	ENSOART00000020775.1, XM_004016410	TNF receptor-associated factor 6, E3 ubiquitin protein ligase	15:65153306-65167464:-1	12.266	7.227	7.285	9.282	7.889	12.484	9.862	10.89	11.677	10.924	14.287	7.164	8.928	12.387	8.721	13.18	11.382	13.751	13.101	9.637	10.004	9.586	9.4	9.921	8.277	11.346	9.731	9.264	8.334	9.437
AASDH	ENSOARG00000003597	ENSOART00000003908.1, XM_012179989, XM_012179990, XM_012179991, XM_012179992, XM_012179994, XM_012179995, XM_012179996, XM_012179997, XM_012179998, XM_012179999	aminoadipate-semialdehyde dehydrogenase	6:71762618-71775358:-1	11.382	4.385	4.305	6.402	5.072	10.25	4.527	5.378	8.772	8.08	14.29	5.613	4.632	8.096	4.621	7.185	3.645	4.612	6.198	5.703	8.942	4.395	4.764	8.37	6.212	12.422	5.257	5.841	9.88	9.519
UBR4	ENSOARG00000010202	ENSOART00000011127.1, XM_012157465	ubiquitin protein ligase E3 component n-recognin 4	2:246278174-246421791:1	5.271	10.237	8.903	4.648	12.345	4.839	10.475	9.696	4.005	14.294	7.234	10.799	9.871	6.274	14.044	4.843	11.845	11.58	5.326	10.021	5.189	10.519	10.821	5.538	10.556	5.091	11.258	9.923	3.746	11.968
E2F8	ENSOARG00000008807	ENSOART00000009591.1, XM_004019453	E2F transcription factor 8	21:25035014-25052584:1	9.168	4.276	2.927	2.169	5.535	6.702	3.388	2.884	2.872	9.083	14.296	3.759	1.895	5.228	2.4	4.116	1.507	1.154	1.591	5.571	6.94	3.005	3.291	3.601	6.154	11.415	3.984	3.476	3.236	10.416
ENSOARG00000020561	ENSOARG00000020561	ENSOART00000022399.1, ENSOART00000022400.1	no description available	3:57392202-57396283:1	10.607	9.365	8.292	12.187	5.685	11.055	14.316	9.65	12.42	6.038	8.996	10.516	12.854	13.631	4.497	9.818	8.568	6.403	11.983	4.314	9.489	5.63	4.13	9.422	5.046	9.601	8.258	5.487	9.584	5.261
ZBTB17	ENSOARG00000008244	ENSOART00000008968.1, XM_012187970	zinc finger and BTB domain containing 17	12:49684299-49705562:1	6.377	9.823	7.434	7.132	4.514	6.597	14.316	11.982	9.987	5.141	6.932	6.688	7.79	8.671	3.49	7.038	8.512	11.679	10.467	4.582	7.372	10.921	7.227	6.637	4.801	6.424	11.371	8.096	7.794	5.013
PCGF1	ENSOARG00000012749	ENSOART00000013860.1	polycomb group ring finger 1	3:96294161-96296296:-1	10.283	8.115	6.436	10.508	6.565	11.552	7.428	11.226	14.318	6.973	10.703	6.935	7.944	13.392	4.965	12.116	8.97	7.344	11.961	6.915	11.149	6.869	8.338	11.854	7.849	10.47	6.586	7.492	11.97	7.719
DHRS7B	ENSOARG00000002423	ENSOART00000002625.1, XM_012185827, XM_012185828, XM_012185829, XM_012185830	dehydrogenase/reductase (SDR family) member 7B	11:34734987-34748987:1	11.309	7.729	4.044	4.503	7.587	10.272	8.141	6.275	8.791	9.681	13.105	8.824	3.319	5.204	6.326	9.731	7.691	8.512	10.824	9.406	11.093	9.313	7.953	9.689	9.104	14.32	9.086	6.473	8.164	9.492
MED19	ENSOARG00000010282	ENSOART00000011183.1, XM_012096655	mediator complex subunit 19	15:78137061-78145460:-1	10.129	10.42	8.959	10.441	7.941	10.478	11.939	13.579	14.32	11.675	9.907	7.711	8.523	9.871	7.496	11.229	12.282	14.091	13.865	8.537	10.048	11.295	12.047	12.015	10.038	10.308	11.12	9.531	10.424	10.34
MMGT1	101105307	XM_004022317, XM_012107274	membrane magnesium transporter 1	X:94119809-94129071:1	7.219	4.234	3.716	9.05	4.657	12.061	7.935	10.494	14.322	5.891	9.601	4.274	3.786	8.54	2.724	10.203	6.068	7.025	12.069	5.59	12.12	6.746	7.609	12.107	6.055	10.938	6.451	10.372	9.863	8.689
COQ7	ENSOARG00000011543	ENSOART00000012553.1, XM_004020798, XM_004020799, XM_012104165	coenzyme Q7 homolog, ubiquinone (yeast)	24:16856134-16869385:-1	8.704	6.349	3.155	5.763	6.231	9.259	7.391	6.507	10.828	12.338	7.367	6.679	4.494	6.264	4.033	9.04	9.213	6.923	12.239	11.351	14.005	10.794	9.387	12.433	14.328	13.54	10.659	8.317	8.855	11.739
ENSOARG00000000596	ENSOARG00000000596	ENSOART00000000640.1	coiled-coil domain-containing protein 25-like	26:30153939-30157645:-1	12.043	6.798	6.379	9.742	5.621	12.177	7.561	8.502	13.484	7.613	11.761	6.902	6.452	10.745	4.763	10.958	7.541	8.711	14.331	6.606	11.689	8.061	7.749	11.963	7.504	13.13	7.64	7.959	11.87	7.847
BRMS1L	ENSOARG00000007853	ENSOART00000008552.1, XM_004017898, XM_012098823, XM_012098824	breast cancer metastasis-suppressor 1-like	18:44895770-44939325:1	11.475	5.465	3.027	5.217	7.215	11.19	5.814	5.066	7.793	11.95	14.351	7.665	3.738	5.279	4.497	11.04	6.164	4.157	8.121	9.816	13.175	6.742	7.97	8.507	10.569	12.791	8.192	5.201	6.836	11.565
NELFB	101103711	XM_012175823	negative elongation factor complex member B	3:637224-644315:-1	6.337	6.833	3.563	3.219	8.799	7.671	7.927	4.556	3.341	14.351	8.205	6.488	2.442	2.368	6.277	5.994	6.646	5.866	4.436	7.954	7.818	8.838	7.59	5.804	8.113	7.556	8.359	5.358	3.72	10.52
PRR14	ENSOARG00000006854	ENSOART00000007453.1, XM_012104391	proline rich 14	24:26794395-26798534:1	7.611	9.546	8.201	5.054	13.756	7.52	8.6	9.319	5.058	14.355	8.968	8.196	6.099	4.592	10.509	6.66	6.921	7.624	5.595	11.898	7.042	8.593	11.175	6.874	11.712	6.923	9.366	8.684	5.338	13.708
ECSCR	101115456	XM_004008854, XM_012178593, XM_012178594	endothelial cell surface expressed chemotaxis and apoptosis regulator	5:48108123-48116242:-1	3.675	4.933	1.311	2.91	2.554	10.915	7.25	5.83	5.121	3.621	4.082	2.427	2.435	2.561	1.761	14.358	8.221	6.671	6.355	3.751	4.676	4.413	3.19	2.671	2.807	4.477	3.495	2.378	3.14	3.365
PRDM2	ENSOARG00000010675	ENSOART00000011614.1, XM_012187508	PR domain containing 2, with ZNF domain	12:51830241-51891715:-1	3.944	8.731	9.307	5.31	6.896	3.643	8.388	10.448	5.229	7.7	5.263	10.582	14.365	7.092	9.308	3.707	10.386	10	4.685	6.156	3.883	8.294	7.636	4.338	6.648	4.141	7.502	8.04	3.978	6.478
AEN	ENSOARG00000010957	ENSOART00000011918.1, XM_004018035, XM_012098441	apoptosis enhancing nuclease	18:18773505-18782585:1	8.924	8.237	10.266	6.916	4.408	8.272	9.135	14.367	12.181	7.618	10.759	4.956	8.893	4.414	2.013	8.906	3.825	6.12	5.27	5.049	10.351	8.765	13.579	7.75	6.39	7.875	5.923	9.191	8.345	5.513
SRGAP1	ENSOARG00000003915	ENSOART00000004259.1, ENSOART00000004261.1, XM_004006501	SLIT-ROBO Rho GTPase activating protein 1	3:155473497-155773009:-1	3.523	3.479	3.627	3.23	6.679	2.726	3.191	3.84	3.062	14.373	5.352	8.376	3.832	2.312	11.359	2.605	4.35	2.539	4.284	9.894	3.286	4.625	6.654	4.864	8.157	3.362	4.082	4.779	3.704	9.421
SAMD4A	ENSOARG00000021076	ENSOART00000022962.1, XM_012181684	sterile alpha motif domain containing 4A	7:64001396-64227192:1	7.726	7.279	1.831	1.75	3.863	9.169	14.374	3.163	2.207	9.947	12.041	12.654	4.572	2.518	2.952	10.846	10.12	7.152	4.621	7.45	7.099	8.49	2.897	3.896	5.531	10.199	7.117	2.299	2.639	7.972
IQGAP3	ENSOARG00000006003	ENSOART00000006538.1, XM_012183383	IQ motif containing GTPase activating protein 3	1:105074278-105119617:-1	8.583	9.848	5.83	4.912	6.73	5.958	6.722	2.965	2.481	9.052	14.376	12.251	6.249	6.249	4.115	5.234	5.053	2.473	2.483	7.418	9.137	9.694	7.287	6.358	9.258	13.433	11.353	7.691	5.849	12.782
RAVER1	ENSOARG00000015886	ENSOART00000017293.1, XM_004008516	ribonucleoprotein, PTB-binding 1	5:12531976-12546122:-1	3.638	11.486	11.408	4.308	12.317	2.327	13.705	12.927	3.093	12.464	3.633	12.822	10.119	2.932	10.333	2.139	9.264	13.089	3.412	9.909	2.668	13.552	14.379	3.953	11.178	3.012	12.414	11.533	2.82	12.243
RTN4IP1	ENSOARG00000011132	ENSOART00000012106.1, XM_012182690	reticulon 4 interacting protein 1	8:30415991-30467554:1	11.944	9.116	5.849	5.489	5.525	11.886	8.565	6.882	8.282	11.039	11.815	7.713	3.118	3.89	3.376	11.407	9.037	7.781	7.926	8.451	14.388	11.244	8.646	9.396	10.043	13.722	9.457	7.951	8.889	9.677
MCOLN3	ENSOARG00000014101	ENSOART00000015361.1	mucolipin 3	1:61405472-61434315:-1	8.378	2.804	4.384	8.234	9.243	2.417	1.243	1.494	2.154	1.769	3.229	2.502	1.622	2.314	4.846	6.816	8.212	6.274	7.111	7.106	2.321	1.279	2.526	4.479	14.401	1.436	1.25	2.411	4.322	2.451
RBM34	ENSOARG00000003469	ENSOART00000003771.1, XM_012104993	RNA binding motif protein 34	25:7943966-7964292:-1	13.852	6.733	6.551	9.296	5.152	13.459	6.836	8.563	13.747	9.568	14.403	5.31	4.59	5.521	2.956	12.194	5.976	4.06	8.065	7.085	13.462	7.168	8.292	12.364	7.744	14.025	7.619	8.48	12.257	9.444
MYO18A	ENSOARG00000006006	ENSOART00000006547.1, XM_012186683	myosin XVIIIA	11:20058419-20162756:-1	11.112	7.685	3.118	2.44	7.14	8.379	6.364	2.08	2.388	14.407	11.568	9.3	1.869	1.357	5.166	8.614	6.99	2.75	3.954	8.229	7.426	6.86	3.705	4.544	7.465	8.303	8.235	3.049	2.635	8.68
LOC101108953	101108953	XM_012097210	cAMP-specific 3',5'-cyclic phosphodiesterase 4D	16:19409871-20384072:1	0	0	0	0.05	0.598	0.932	0	0	0.292	0.407	14.413	0.934	0	2.193	2.629	0.072	0	0	2.544	0.195	0.383	0	0	0.111	0	0.077	0	0	0	0
ISOC2	ENSOARG00000001349	ENSOART00000001449.1, XM_012094764	isochorismatase domain containing 2	14:59324872-59330025:1	5.431	7.317	4.18	3.635	6.251	8.612	10.008	5.894	6.349	6.929	5.883	5.038	3.588	2.779	2.343	8.606	6.41	5.857	6.392	7.854	10.211	9.625	8.92	6.676	8.666	9.983	14.418	7.957	7.522	8.731
SGOL2	101104300	XM_012142023	shugoshin-like 2 (S. pombe)	2:201764140-201793671:1	13.797	3.387	3.055	7.008	3.11	9.626	2.417	2.836	7.507	5.639	12.127	3.9	2.296	7.935	1.895	6.869	2.583	2.531	7.932	3.907	12.911	5.205	5.372	11.993	4.886	14.418	3.951	4.23	8.335	7.808
HINFP	ENSOARG00000013643	ENSOART00000014849.1, XM_004016097	histone H4 transcription factor	15:29190679-29196729:1	10.935	4.471	4.162	5.896	9.523	10.019	3.914	5.615	8.345	11.352	14.419	3.414	3.614	6.362	6.481	8.794	4.894	4.475	7.441	10.138	9.58	5.607	6.202	8.612	12.133	9.854	3.569	4.85	6.992	8.519
RBM27	ENSOARG00000002840	ENSOART00000003086.1, ENSOART00000003088.1, XM_004008925, XM_012178689, XM_012178690, XM_012178691	RNA binding motif protein 27	5:54895514-54951937:1	13.728	7.273	8.882	12.815	6.998	12.725	8.189	11.964	14.429	9.592	13.95	6.656	9.135	13.653	5.823	11.329	7.017	8.904	12.495	7.723	13.099	7.936	9.008	12.47	7.448	14.009	6.401	9.374	12.434	10.012
SIRT3	ENSOARG00000008832	ENSOART00000009613.1, XM_004019744	sirtuin 3	21:49839434-49863896:1	8.463	7.365	3.581	3.459	3.94	11.473	8.311	4.081	3.882	8.702	7.744	7.069	2.835	2.16	2.914	14.437	10.779	8.274	6.565	11.897	11.193	9.901	7.202	5.687	10.679	10.808	9.668	5.131	3.919	9.967
LOC101112188	101112188	XM_012104579, XM_012104581, XM_012104582	uncharacterized LOC101112188	24:36704186-36713296:-1	8.089	6.062	7.123	6.289	13.309	9.055	7.092	8.003	6.677	10.668	12.083	5.023	7.652	8.861	6.489	7.463	5.461	7.24	7.763	8.244	8.23	6.195	9.201	8.773	10.717	8.9	5.518	8.138	6.537	14.44
SMIM10	105605711	XM_012107822	small integral membrane protein 10	X:94609397-94726269:1	14.21	10.132	7.622	8.506	8.724	11.508	9.581	10.223	9.219	11.469	14.441	9.323	6.112	8.173	7.243	12.078	8.874	9.676	10.991	9.169	12.901	10.229	9.812	10.677	8.861	11.35	9.705	8.661	8.06	10.418
LOC101112162	101112162	XM_004016883, XM_012096752	beta-hexosaminidase subunit beta-like	16:6875291-6908790:1	8.182	7.75	6.865	3.994	5.17	11.477	9.49	6.031	4.476	6.783	6.759	6.091	5.443	4.147	2.371	14.442	11.99	7.613	7.815	9.507	6.476	5.924	8.561	3.413	4.014	7.477	4.119	3.252	4.274	6.425
LZTS2	ENSOARG00000016108	ENSOART00000017541.1, XM_012102805	leucine zipper, putative tumor suppressor 2	22:20981787-20988786:1	8.412	2.245	2.06	4.465	9.905	9.72	2.805	2.919	5.162	14.442	9.1	1.497	1.039	2.104	7.563	8.023	3.582	2.072	4.952	10.678	9.12	3.717	6.14	7.054	11.723	8.045	2.037	2.1	4.066	10.939
TMEM255A	ENSOARG00000013031	ENSOART00000014164.1, ENSOART00000014165.1, XM_004022346, XM_012107345, XM_012107346	transmembrane protein 255A	X:98982678-99028629:-1	1.272	0.751	0.689	0.764	0.8	1.449	1.284	1.536	1.291	0.653	1.148	0.712	0.63	1.29	0.331	1.59	14.442	13.492	8.397	0.616	1.622	1.114	0.684	1.329	0.68	1.552	0.604	0.664	0.856	0.797
LOC101113264	101113264	XM_012094981	AFG3-like protein 1	14:14267343-14287625:1	9.709	8.863	8.967	6.042	6.275	8.645	7.733	6.012	5.495	9.965	14.443	13.404	8.401	7.212	5.134	8.419	6.415	5.374	5.8	8.094	9.21	9.462	9.363	8.454	8.581	8.969	9.579	8.604	6.432	9.842
ZFYVE27	ENSOARG00000011270	ENSOART00000012252.1, XM_012102719, XM_012102720, XM_012102721, XM_012102722, XM_012102723, XM_012102724	zinc finger, FYVE domain containing 27	22:18106706-18130031:1	8.823	10.853	9.937	12.393	11.05	9.912	11.005	10.946	14.168	11.209	8.341	9.852	8.729	13.587	12.073	9.763	9.366	14.443	13.198	9.921	10.6	11.396	10.702	11.717	9.155	11.471	10.221	10.227	12.759	9.638
METTL14	ENSOARG00000017247	ENSOART00000018774.1, XM_012179421	methyltransferase like 14	6:6805565-6847259:-1	12.156	4.842	3.637	7.369	5.557	11.078	4.785	7.604	14.462	8.677	13.68	3.764	4.746	9.643	4.05	9.603	4.172	5.573	10.453	5.64	12.748	5.673	7.8	12.477	7.155	12.225	3.234	4.306	11.844	6.837
SAAL1	ENSOARG00000000884	ENSOART00000000956.1	serum amyloid A like 1	15:33965672-33986443:1	10.151	5.879	4.533	5.799	5.769	10.239	5.247	5.236	9.466	9.781	14.232	7.394	5.276	6.457	3.276	7.553	5.384	5.749	8.154	8.76	11.193	7.038	6.622	9.268	9.418	14.463	6.872	6.374	8.067	9.811
WWC3	ENSOARG00000010415	ENSOART00000011342.1, ENSOART00000011344.1, XM_012106202, XM_012106203, XM_012106204, XM_012106205, XM_012106206	WWC family member 3	X:7233432-7298076:-1	9.22	10.276	8.804	9.047	14.463	9.059	9.167	7.451	6.664	12.859	9.847	9.64	5.984	6.076	10.011	8.777	12.04	8.428	7.223	9.452	11.747	13.285	11.466	10.688	12.018	11.974	13.606	10.984	9.322	14.16
ENSOARG00000010149	ENSOARG00000010149	ENSOART00000011051.1	no description available	24:14521443-14578119:1	11.987	9.709	8.008	8.938	12.156	8.969	10.387	13.776	9.03	14.464	11.998	9.584	9.814	6.91	6.392	9.169	10.055	8.792	8.875	12.521	9.598	9.765	9.69	12.536	12.252	10.248	11.317	10.269	9.807	13.707
NCAM1	ENSOARG00000016809	ENSOART00000018306.1, XM_004016028	neural cell adhesion molecule 1	15:22904311-23270985:1	1.033	1.26	0.87	0.458	0.239	2.403	2.268	1.351	1.247	1.138	7.346	4.161	2.733	2.046	0.721	2.658	1.287	1.017	1.05	0.403	7.296	6.168	4.304	3.13	2.464	13.068	14.464	10.013	6.227	2.887
TYW1	ENSOARG00000010673	ENSOART00000011613.1, XM_004020949, XM_012104431, XM_012104432	tRNA-yW synthesizing protein 1 homolog (S. cerevisiae)	24:28285304-28428531:1	11.703	6.163	2.986	5.737	6.465	9.829	4.881	4.373	8.656	9.986	14.467	7.087	2.126	4.731	3.757	9.716	4.941	4.289	7.034	9.03	10.514	5.692	4.769	8.296	8.086	12.779	5.925	3.229	8.218	8.75
C2CD2	ENSOARG00000010526	ENSOART00000011456.1	C2 calcium dependent domain containing 2	1:260207041-260266002:-1	4.518	4.513	3.491	3.814	2.723	3.768	7.819	4.689	6.509	3.901	5.243	5.794	3.204	5.386	3.117	3.035	14.474	6.848	7.217	2.417	2.847	5.466	3.798	4.339	2.44	4.648	3.962	2.983	3.368	2.827
TFDP2	ENSOARG00000006450	ENSOART00000007012.1, XM_004003288, XM_012102149, XM_012102154, XM_012102160, XM_012102166, XM_012102173, XM_012102177, XM_012102183, XM_012102189, XM_012102195, XM_012102202, XM_012102206, XM_012102208, XM_012102211, XM_012102216, XM_012102224	transcription factor Dp-2 (E2F dimerization partner 2)	1:244997250-245046750:1	12.335	5.737	1.486	2.495	3.954	14.451	4.511	2.806	4.684	8.906	14.48	6.905	1.749	3.654	2.843	14.236	7.45	2.917	6.346	7.906	13.347	6.181	2.725	6.003	6.608	10.473	4.829	1.685	3.874	6.281
INTS2	ENSOARG00000015532	ENSOART00000016906.1, XM_004012422	integrator complex subunit 2	11:10721974-10777626:1	12.546	6.672	6.392	10.766	6.609	9.883	5.688	8.451	14.481	6.815	12.404	5.359	5.666	11.204	4.962	10.174	5.065	6.474	12.496	5.748	12.276	7.03	7.582	12.72	6.852	11.897	5.456	6.099	11.586	8.279
CHM	ENSOARG00000002594	ENSOART00000002809.1, ENSOART00000002810.1, XM_004022232	choroideremia (Rab escort protein 1)	X:73665094-73911067:-1	13.111	4.327	4.068	7.711	4.337	13.693	3.458	5.208	10.602	6.547	12.522	5.138	3.527	8.407	3.62	12.805	6.018	5.647	12.074	5.785	14.486	6.408	6.62	12.91	6.988	12.737	5.181	4.929	10.839	6.928
LARGE	101120155	XM_012176096	like-glycosyltransferase	3:176865461-177196996:-1	7.07	6.252	3.486	2.325	5.217	8.971	5.778	3.387	2.081	9.358	6.427	6.59	2.144	2.37	3	14.489	9.582	9.582	5.923	5.257	4.222	4.015	2.569	2.368	3.429	5.675	5.338	2.757	2.611	4.955
CHAF1A	ENSOARG00000009704	ENSOART00000010566.1, XM_004008596	chromatin assembly factor 1, subunit A (p150)	5:17253898-17278528:-1	9.777	3.928	2.377	2.915	7.72	8.26	3.856	2.761	3.014	12.031	14.494	3.33	2.627	4.49	4.795	6.117	4.143	3.129	2.831	8.884	9.022	4.822	3.625	3.58	9.175	11.849	4.374	4.354	3.639	10.933
NXPH3	ENSOARG00000005971	ENSOART00000006490.1, XM_004012789	neurexophilin 3	11:36578335-36582465:-1	6.67	3.23	1.15	0.933	7.305	6.825	4.043	1.711	2.212	14.505	9.058	5.411	0.602	0.556	8.954	3.166	2.978	1.478	2.005	6.56	9.643	5.456	3.103	3.183	11.843	7.614	4.99	1.765	1.145	9.273
DCBLD2	ENSOARG00000017823	ENSOART00000019394.1, XM_004002870, XM_012188531	discoidin, CUB and LCCL domain containing 2	1:161576339-161636830:-1	14.508	7.416	8.951	11.723	5.882	6.804	4.579	5.4	6.398	5.207	12.705	8.513	9.625	13.334	10.004	7.252	3.527	4.33	6.618	3.345	6.151	4.652	4.426	5.793	4.669	6.039	5.481	6.168	6.728	4.501
ZNF32	ENSOARG00000002999	ENSOART00000003247.1, XM_012105584	zinc finger protein 32	25:45174228-45178783:1	14.509	2.336	1.695	3.2	6.796	11.911	2.557	2.202	5.983	8.547	12.765	2.409	1.503	3.268	2.245	9.282	6.431	3.603	5.844	8.952	13.328	4.509	3.114	7.172	11.3	12.018	3.461	2.424	4.942	9.06
RYK	ENSOARG00000008308	ENSOART00000009043.1	receptor like tyrosine kinase	1:253172088-253258070:1	8.096	3.857	4.294	7.374	6.508	3.744	2.871	4.316	7.172	4.002	9.975	4.585	2.561	6.566	8.538	5.471	3.872	4.856	11.674	5.674	8.385	5.459	7.532	11.687	5.551	11.335	6.463	6.856	14.511	7.509
RNF166	ENSOARG00000013194	ENSOART00000014349.1	ring finger protein 166	14:13448481-13455118:-1	7.781	11.409	6.448	4.866	6.307	6.127	11.161	7.217	5.127	6.663	6.688	7.648	4.459	2.538	3.95	6.264	14.518	10.396	5.097	7.553	7.035	9.683	9.026	4.517	6.924	6.711	10.242	6.416	5.208	7.454
C3H9orf9	101113214	XM_004005576, XM_012160807, XM_012160815, XM_012160825, XM_012160833	chromosome 3 open reading frame, human C9orf9	3:3934986-3951778:-1	10.453	9.609	9.239	5.715	11.123	11.89	10.396	10.119	5.958	14.524	10.863	4.948	5.888	4.992	6.7	10.35	10.395	11.956	9.117	12.402	10.811	10.639	8.545	8.137	11.948	12.398	11.486	9.484	8.365	12.084
ARHGAP27	101119739	XM_012186795	Rho GTPase activating protein 27	11:44467816-44504665:-1	9.751	4.443	3.325	5.519	13.861	6.979	3.58	2.39	3.241	11.63	12.498	6.559	1.748	3.656	14.532	5.861	3.183	2.887	3.481	8.131	6.657	4.01	3.298	5.585	5.626	8.308	3.778	2.542	3.84	8.807
EIF4ENIF1	ENSOARG00000010610	ENSOART00000011545.1, ENSOART00000011548.1, XM_004017497, XM_004017498, XM_012098074, XM_012098075, XM_012098076	eukaryotic translation initiation factor 4E nuclear import factor 1	17:69638264-69676900:-1	9.3	6.002	6.101	5.384	9.285	10.113	6.913	9.293	7.485	14.532	11.938	4.933	7.614	7.348	8.482	7.854	5.692	7.854	7.174	10.068	9.407	7.006	9.094	7.989	11.324	9.092	5.568	7.245	5.914	11.372
PSD4	ENSOARG00000020818	ENSOART00000022682.1, XM_012175969	pleckstrin and Sec7 domain containing 4	3:59642064-59672723:-1	10.117	8.055	6.769	8.7	12.281	12.821	11.651	10.421	10.32	14.536	14.252	8.356	4.631	10.621	13.957	12.232	10.151	8.181	10.506	10.922	13.201	11.173	11.446	11.096	12.518	14.064	10.111	8.27	9.217	12.654
TBC1D31	ENSOARG00000010832	ENSOART00000011783.1, ENSOART00000011785.1, XM_012183614, XM_012183616, XM_012183617, XM_012183618, XM_012183620, XM_012183621, XM_012183622	TBC1 domain family, member 31	9:29486800-29545613:-1	12.086	3.601	2.356	4.798	6.158	11.151	3.358	3.036	7.521	8.783	14.536	4.742	2.28	5.138	3.396	8.192	3.296	2.472	5.789	6.746	12.036	4.752	3.736	8.116	6.621	13.436	4.827	3.889	7.637	9.275
YARS2	ENSOARG00000019327	ENSOART00000021048.1	tyrosyl-tRNA synthetase 2	3:181836948-181847495:1	12.636	5.086	3.991	5.587	4.52	10.972	4.11	5.572	10.393	7.719	12.448	3.952	2.379	4.183	2	12.671	5.765	5.291	8.718	6.706	14.541	7.752	8.342	11.745	8.835	13.13	6.617	4.669	8.722	8.182
ENSOARG00000013758	ENSOARG00000013758	ENSOART00000014971.1	no description available	14:13736405-13773087:1	6.813	9.804	7.11	5.485	7.768	9.942	9.149	10.278	7.646	11.527	7.461	7.441	5.306	4.197	4.187	11.595	11.563	14.545	9.546	11.043	8.854	9.917	10.777	8.18	10.256	7.078	12.607	11.44	7.273	9.871
GABPB2	ENSOARG00000020927	ENSOART00000022799.1, XM_012180913, XM_012180921, XM_012180927	GA binding protein transcription factor, beta subunit 2	1:99910735-99931931:1	9.925	3.676	2.559	6.641	4.795	12.062	5.502	5.394	14.545	8.882	10.125	3.624	2.171	9.269	3.873	10.345	4.011	3.934	12.088	4.293	9.292	4.28	5.128	9.357	5.593	11.568	2.92	4.113	8.514	6.385
NAF1	ENSOARG00000013716	ENSOART00000014925.1, XM_004009579	nuclear assembly factor 1 ribonucleoprotein	6:2827879-2862077:1	3.46	7.12	8.121	4.466	4.776	3.201	8.723	14.549	6.129	6.156	3.44	6.289	7.063	3.203	2.633	3.399	7.002	7.114	3.92	5.924	3.395	8.737	11.679	4.516	6.33	3.513	7.652	10.925	4.802	6.398
FAM122A	ENSOARG00000008458	ENSOART00000009203.1	family with sequence similarity 122A	2:67426962-67427957:-1	12.623	6.13	8.451	11.523	11.287	12.45	7.284	12.944	14.472	14.551	13.365	5.157	7.821	9.643	10.433	13.169	10.347	12.521	12.532	12.152	10.138	7.904	10.741	11.87	12.155	11.787	6.554	8.517	12.645	12.783
PRRC1	ENSOARG00000017766	ENSOART00000019331.1, XM_004008657	proline-rich coiled-coil 1	5:23935326-23978769:-1	5.496	6.615	5.221	6.303	11.436	8.22	6.923	9.688	8.46	11.266	5.871	6.149	4.358	7.475	10.808	7.821	14.551	10.944	8.249	7.891	9.894	9.924	10.422	10.337	11.305	9.74	10.446	7.673	9.315	12.564
AGPAT9	101119394	XM_004009966, XM_012180287, XM_012180288, XM_012180289, XM_012180290	1-acylglycerol-3-phosphate O-acyltransferase 9	6:97908300-97960173:1	1.882	0.543	2.387	7.465	1.023	0.457	0.772	1.278	8.208	0.479	0.753	0.721	3.859	14.556	2.025	0.292	0.502	0.733	3.599	0.268	0.564	1.278	0.404	3.581	0.28	0	0.406	0.363	3.111	0.105
MLLT1	ENSOARG00000006297	ENSOART00000006846.1, XM_012178021	myeloid/lymphoid or mixed-lineage leukemia (trithorax homolog, Drosophila); translocated to, 1	5:15766498-15826761:1	7.479	9.969	14.56	10.665	12.491	7.111	10.702	13.194	9.382	9.57	7.688	7.516	8.624	8.514	7.508	6.467	6.303	7.768	5.83	7.625	7.297	10.133	13.565	7.901	7.725	7.679	9.734	12.113	8.007	9.376
ALG2	ENSOARG00000010960	ENSOART00000011920.1, XM_004004225	ALG2, alpha-1,3/1,6-mannosyltransferase	2:48313584-48318093:1	8.396	8.018	5.722	7.451	4.334	11.352	9.525	11.375	14.562	7.862	8.497	5.22	3.221	9.026	4.574	10.48	8.75	6.907	12.737	4.979	7.804	6.325	8.437	10.229	5.949	10.316	5.285	5.686	10.945	6.581
SPAG11B	101105976	XM_004021676	sperm associated antigen 11B	26:5968861-5971810:1	0	0	0.441	0	0	0	1.833	4.872	14.571	0	0	0	0.964	1.508	0	0	0	0	2.218	0	0	0.817	1.536	1.984	0.256	0.567	0	0.481	4.738	0
UBE4B	ENSOARG00000006405	ENSOART00000006972.1, XM_012187937	ubiquitination factor E4B	12:41522254-41641053:-1	13.545	6.049	3.551	5.105	7.713	11.372	5.881	3.914	4.823	12.231	14.575	7.221	2.742	4.316	8.018	11.263	6.523	4.058	5.89	8.002	11.049	6.724	5.472	7.43	9.204	11.81	7.459	4.269	4.865	10.782
ZNF367	ENSOARG00000008474	ENSOART00000009221.1, XM_012154778	zinc finger protein 367	2:29632575-29657775:1	10.943	4.458	2.067	3.133	5.139	11.697	4.202	1.822	2.46	7.082	13.2	3.186	1.152	4.422	2.767	8.417	2.687	1.386	2.844	5.348	9.36	3.823	2.744	3.279	5.59	14.577	4.154	2.84	2.597	7.77
NUBP2	ENSOARG00000016517	ENSOART00000017990.1, XM_004020707	nucleotide binding protein 2	24:1346572-1363461:1	6.598	7.975	6.732	6.701	6.862	7.152	8.869	10.294	11.765	10.755	7.231	6.068	4.959	5.121	4.87	7.758	6.212	6.935	6.352	7.642	10.267	11.602	14.579	12.359	11.814	9.674	8.351	7.979	8.88	9.042
MIPEP	ENSOARG00000013328	ENSOART00000014503.1, ENSOART00000014505.1, XM_012184683	mitochondrial intermediate peptidase	10:34492933-34573588:1	11.802	9.953	8.072	7.825	8.422	11.103	8.812	9.782	8.75	8.571	14.588	9.472	7.661	7.438	4.544	10.814	7.239	6.902	7.714	8.588	13.857	10.82	10.557	11.57	10.918	13.589	11.304	10.831	10.209	12.086
LOC101102413	101102413	XM_004015111	haptoglobin	14:38339866-38346371:-1	4.745	2.396	2.443	1.72	0.742	7.838	9.728	8.479	6.988	7.202	4.31	2.633	2.11	1.847	4.179	12.139	8.544	12.665	14.589	6.888	2.05	2.392	1.819	2.143	2.501	3.243	4.155	6.68	4.37	2.84
LOC101114610	101114610	XM_012178066	hepatoma-derived growth factor-related protein 2	5:17204585-17220194:-1	11.917	8.025	5.712	7.488	10.685	9.724	9.284	6.879	6.699	14.592	13.131	8.509	2.941	7.913	6.851	11.095	8.259	8.324	6.771	10.149	11.069	9.686	9.644	9.59	11.966	11.839	9.964	6.926	7.76	13.045
MECP2	ENSOARG00000005806	ENSOART00000006320.1, ENSOART00000006321.1, XM_012107079	methyl CpG binding protein 2	X:77404253-77459044:1	12.088	7.97	6.729	9.002	11.653	12.485	7.066	8.242	10.24	14.464	14.593	6.812	4.537	10.222	10.627	11.745	7.308	7.391	12.264	12.191	10.902	9.35	9	10.976	13.077	12.387	8.228	8.167	7.998	12.598
MED14	ENSOARG00000001621	ENSOART00000001753.1, XM_012106505	mediator complex subunit 14	X:37874662-37936674:-1	11.442	9.802	8.033	9.991	8.375	10.25	10.611	11.07	10.792	9.522	12.812	10.163	7.076	9.903	8.309	10.374	14.169	14.595	13.693	8.279	11.089	10.755	10.376	10.758	9.02	13.645	11.169	12.687	14.168	9.844
TRPS1	ENSOARG00000010810	ENSOART00000011753.1, XM_004011774, XM_004011775, XM_012183938, XM_012183939, XM_012183940, XM_012183941, XM_012183942, XM_012183943, XM_012183944, XM_012183945, XM_012183946	trichorhinophalangeal syndrome I	9:61511840-61758124:1	13.669	2.368	1.782	3.973	4.643	13.582	1.9	3.349	5.805	8.129	14.598	4.528	1.736	4.409	3.515	12.751	4.102	2.278	6.89	6.78	11.162	2.618	2.604	6.53	6.422	11.299	2.743	1.386	3.978	6.261
RNF150	ENSOARG00000012236	ENSOART00000013306.1, XM_004017233, XM_012097443	ring finger protein 150	17:16327808-16608706:1	9.02	7.89	5.319	8.289	11.407	8.819	7.004	6.203	5.641	10.361	9.035	5.883	4.55	3.752	8.416	12.124	9.322	5.359	7.27	9.008	9.766	8.191	7.312	14.604	11.232	9.9	8.338	6.342	11.484	11.188
B3GNT3	ENSOARG00000015019	ENSOART00000016346.1, XM_012179097	UDP-GlcNAc:betaGal beta-1,3-N-acetylglucosaminyltransferase 3	5:5075618-5094464:-1	3.228	1.284	2.279	4.022	8.159	2.854	1.828	4.253	6.228	2.065	2.89	1.012	2.965	4.639	4.439	3.052	2.583	4.906	7.273	5.001	3.755	1.757	4.876	9.64	6.224	4.102	2.752	7.283	14.605	8.095
SMIM8	ENSOARG00000013115	ENSOART00000014256.1, XM_012182809	small integral membrane protein 8	8:49694057-49704962:-1	14.606	6.688	4.217	4.956	9.184	7.881	2.799	3.567	5.631	10.272	13.488	5.542	3.353	4.105	5.892	6.458	6.379	2.004	4.23	7.973	13.885	9.21	8.034	9.776	9.308	12.189	8.535	7.861	9.893	7.882
PIGV	ENSOARG00000004157	ENSOART00000004517.1, ENSOART00000004518.1, XM_012151360, XM_012151374, XM_012151380	phosphatidylinositol glycan anchor biosynthesis, class V	2:239261645-239271225:-1	13.135	13.504	7.923	8.235	11.918	13.771	12.107	10.792	10.868	14.608	12.42	13.917	8.131	11.761	10.64	13.873	11.671	10.197	14.108	11.681	11.68	12.715	9.532	11.177	12.559	12.129	11.496	7.941	8.539	12.34
ASNS	ENSOARG00000004686	ENSOART00000005101.1	asparagine synthetase (glutamine-hydrolyzing)	4:14991159-15007966:-1	3.263	1.463	1.574	1.967	2.721	4.464	1.285	2.36	2.728	2.384	4.032	2.12	1.766	1.676	1.736	9.834	6.929	6.678	3.038	14.613	2.847	2.189	1.977	3.138	2.73	3.666	2.079	1.538	2.897	2.815
PGM2L1	ENSOARG00000009895	ENSOART00000010773.1	phosphoglucomutase 2 like 1	15:51885345-51940213:-1	11.358	3.151	1.057	2.392	4.914	14.62	3.207	0.96	3.159	7.926	13.163	2.742	0.217	1.763	3.75	11.408	2.731	1.11	4.097	4.824	14.558	3.95	1.968	6.116	5.965	12.741	3.5	1.6	3.844	6.609
CLP1	ENSOARG00000010145	ENSOART00000011035.1, XM_012096452	cleavage and polyadenylation factor I subunit 1	15:78106137-78109261:1	10.771	10.054	12.249	8.17	12.021	9.565	12.232	14.623	11.009	13.448	12.173	8.07	9.286	7.313	8.551	9.29	11.262	10.274	8.449	11.184	7.998	12.34	13.194	7.947	11.164	10.67	9.066	13.096	9.856	11.251
LOC101115410	101115410	XM_004019092	histone H2B type 1-A-like	20:31076991-31077498:1	2.758	9.766	6.585	4.83	0.949	1.614	5.076	3.311	3.35	0.865	1.91	14.625	7.61	5.057	2.857	1.343	4.833	4.841	4.233	2.18	1.28	4.915	2.348	3.307	1.402	1.757	6.866	3.564	4.025	0.798
LOC101111776	101111776	XM_004004583, XM_012133548	mitogen-activated protein kinase kinase kinase MLT	2:135573408-135690383:-1	7.333	3.356	3.827	7.424	6.443	9.868	3.954	8.079	14.628	12.728	11.496	4.444	4.75	10.127	10.841	9.373	3.825	4.339	9.224	9.19	7.346	3.446	4.247	6.817	5.595	8.628	3.295	4.52	8.307	8.046
CARS2	ENSOARG00000006892	ENSOART00000007500.1, XM_012185046	cysteinyl-tRNA synthetase 2, mitochondrial (putative)	10:84587994-84606335:-1	10.547	9.007	6.675	7.27	7.565	14.406	11.559	8.673	9.115	11.073	10.088	7.775	5.59	3.845	4.307	14.632	9.128	8.669	9.442	9.18	13.252	11.175	11.485	10.884	10.317	13.833	11.519	7.931	9.76	10.271
ENSOARG00000011096	ENSOARG00000011096	ENSOART00000012066.1	no description available	1:112857783-112861189:-1	12.073	2.082	1.305	11.734	1.424	11.226	4.009	2.29	9.303	2.099	11.33	2.478	2.24	7.333	1.184	7.974	2.778	2.206	11.252	1.894	11.22	2.495	2.207	10.967	2.029	14.633	1.744	1.808	10.768	3.969
SESTD1	ENSOARG00000016943	ENSOART00000018462.1, XM_004004540, XM_012132362	SEC14 and spectrin domains 1	2:129783500-129877452:1	14.309	12.221	12.136	11.784	11.956	9.187	9.303	9.301	8.409	13.89	14.641	13.273	9.495	9.67	11.785	9.033	11.25	8.945	8.765	12.872	9.294	9.065	8.365	8.107	9.311	10.182	11.531	8.676	7.578	13.376
DEAF1	ENSOARG00000006285	ENSOART00000006836.1, XM_012102246	DEAF1 transcription factor	21:49408946-49433036:1	9.056	7.492	6.691	7.087	13.935	13.405	10.883	8.896	10.481	14.644	9.83	8.027	6.516	6.296	7.015	13.133	8.976	8.54	9.206	10.467	11.298	10.295	10.549	12.041	12.263	9.816	8.799	6.682	9.259	14.253
RMDN2	101119968	XM_004006014, XM_012173541, XM_012173542, XM_012173543	regulator of microtubule dynamics 2	3:85999282-86065664:-1	14.65	4.056	2.896	5.793	3.45	10.894	3.995	3.745	6.781	5.86	10.988	6.012	2.008	4.751	2.709	10.512	3.838	3.189	7.286	4.805	9.453	2.327	3.242	5.578	5.341	9.824	3.157	3.293	5.954	5.361
ENSOARG00000002987	ENSOARG00000002987	ENSOART00000003236.1, ENSOART00000003238.1	no description available	X:75217690-75428320:1	6.92	7.552	3.758	5.244	8.761	8.18	8.9	7.872	5.921	12.558	8.686	5.967	3.852	3.335	6.753	7.944	10.761	10.933	6.267	14.651	8.193	9.294	9.231	7.326	10.941	6.31	11.634	8.526	5.525	11.208
MTMR10	ENSOARG00000016152	ENSOART00000017593.1, XM_004017803, XM_012098589	myotubularin related protein 10	18:26414864-26455478:-1	13.823	4.56	3.507	6.321	7.335	11.679	4.027	3.768	8.822	9.029	14.652	4.57	3.21	7.015	5.218	9.878	3.992	3.853	9.128	7.313	10.388	4.362	4.525	8.385	6.001	12.788	3.311	2.981	7.008	7.161
RPAIN	ENSOARG00000003539	ENSOART00000003844.1, XM_012185565	RPA interacting protein	11:25742163-25748797:-1	12.618	5.323	2.953	4.797	14.655	11.56	5.59	5.279	9.481	13.035	12.528	5.017	2.848	8.431	9.305	10.09	5.767	5.128	10.504	10.872	12.973	8.14	6.689	9.178	11.929	13.828	6.917	4.699	6.83	11.809
ENSOARG00000012275	ENSOARG00000012275	ENSOART00000013345.1	no description available	8:45307555-45359566:-1	13.933	5.584	5.169	11.486	8.198	13.614	6.16	4.552	10.489	2.585	12.299	3.521	4.785	11.464	5.137	14.66	6.076	5.917	11.997	4.572	12.168	4.142	6.358	10.752	4.162	12.627	3.703	4.093	10.385	4.462
CMTM8	ENSOARG00000015016	ENSOART00000016342.1	CKLF like MARVEL transmembrane domain containing 8	19:6716368-6723232:1	0.114	10.631	2.091	0.288	1.656	0.646	14.672	7.509	0.218	9.045	0.249	2.881	0.867	0.222	0.164	1.952	14.22	10.801	0.565	6.979	0.807	5.346	5.346	0.937	4.037	1.574	8.009	5.309	0.949	6.364
ENSOARG00000008096	ENSOARG00000008096	ENSOART00000008808.1	no description available	3:6330518-6338751:-1	2.543	6.664	5.933	3.121	11.526	2.666	7.258	5.412	2.685	4.6	4.512	6.098	3.584	2.584	14.681	4.035	5.796	3.657	2.802	4.49	5.556	10.842	10.994	6.127	4.18	6.297	10.66	11.324	5.021	4.203
PRAF2	ENSOARG00000011032	ENSOART00000011999.1, XM_012106723	PRA1 domain family, member 2	X:52759023-52762404:1	10.658	7.53	6.798	6.698	12.481	7.238	7.995	7.094	4.49	14.699	8.27	11.92	5.012	4.168	10.771	8.762	8.404	7.92	7.296	9.817	9.232	11.77	9.264	7.059	11.758	8.099	10.3	8.068	6.055	11.542
[truncated: 8,263 more rows]
